# Supplementary material for: Effects of changes on gut microbiota in children with acute Kawasaki disease
Source: PeerJ journal article supplement (doi:10.7717/peerj.9698), 2020-08-06
Supplement: Supplemental_File.zip [file Supplemental_File.zip]

k\_Bacteria;p\_Bacteroidetes;c\_Bacteroidia;o\_Bacteroidales;f\_Bacteroidaceae

k\_Bacteria;p\_Firmicutes;c\_Clostridia;o\_Clostridiales;f\_Lachnospiraceae

k\_Bacteria;p\_Firmicutes;c\_Bacilli;o\_Lactobacillales;f\_Enterococcaceae

k\_Bacteria;p\_Proteobacteria;c\_Gammaproteobacteria;o\_Enterobacteriales;f\_Enterobacteriaceae

k\_Bacteria;p\_Actinobacteria;c\_Actinobacteria;o\_Bifidobacteriales;f\_Bifidobacteriaceae

k\_Bacteria;p\_Firmicutes;c\_Clostridia;o\_Clostridiales;f\_Ruminococcaceae

k\_Bacteria;p\_Firmicutes;c\_Erysipelotrichi;o\_Erysipelotrichales;f\_Erysipelotrichaceae

k\_Bacteria;p\_Firmicutes;c\_Clostridia;o\_Clostridiales;f\_Veillonellaceae

k\_Bacteria;p\_Proteobacteria;c\_Betaproteobacteria;o\_Burkholderiales;f\_Oxalobacteraceae

k\_Bacteria;p\_Proteobacteria;c\_Gammaproteobacteria;o\_Pseudomonadales;f\_Moraxellaceae

k\_Bacteria;p\_Bacteroidetes;c\_Bacteroidia;o\_Bacteroidales;f\_Porphyromonadaceae

k\_Bacteria;p\_Firmicutes;c\_Clostridia;o\_Clostridiales;f\_Unclassified\_Clostridiales

k\_Bacteria;p\_Proteobacteria;c\_Betaproteobacteria;o\_Burkholderiales;f\_Alcaligenaceae

k\_Bacteria;p\_Firmicutes;c\_Bacilli;o\_Lactobacillales;f\_Streptococcaceae

k\_Bacteria;p\_Bacteroidetes;c\_Bacteroidia;o\_Bacteroidales;f\_Rikenellaceae

k\_Bacteria;p\_Firmicutes;c\_Clostridia;o\_Clostridiales;f\_Clostridiaceae

k\_Bacteria;p\_Actinobacteria;c\_Coriobacteriia;o\_Coriobacteriales;f\_Coriobacteriaceae

k\_Bacteria;p\_Actinobacteria;c\_Actinobacteria;o\_Actinomycetales;f\_Micrococcaceae

k\_Bacteria;p\_Firmicutes;c\_Bacilli;o\_Lactobacillales;f\_Unclassified\_Lactobacillales

k\_Bacteria;p\_Firmicutes;c\_Clostridia;o\_Clostridiales;f\_Peptostreptococcaceae

k\_Bacteria;p\_Firmicutes;c\_Bacilli;o\_Lactobacillales;f\_Aerococcaceae

k\_Bacteria;p\_Proteobacteria;c\_Deltaproteobacteria;o\_Desulfovibrionales;f\_Desulfovibrionaceae

k\_Bacteria;p\_Proteobacteria;c\_Gammaproteobacteria;o\_Xanthomonadales;f\_Xanthomonadaceae

k\_Bacteria;p\_Proteobacteria;c\_Betaproteobacteria;o\_Burkholderiales;f\_Burkholderiaceae

k\_Bacteria;p\_Actinobacteria;c\_Actinobacteria;o\_Actinomycetales;f\_Actinomycetaceae

k\_Bacteria;p\_Firmicutes;c\_Clostridia;o\_Clostridiales;f\_[Mogibacteriaceae]

k\_Bacteria;p\_Proteobacteria;c\_Betaproteobacteria;o\_Burkholderiales;f\_Unclassified\_Burkholderiales

k\_Bacteria;p\_Proteobacteria;c\_Betaproteobacteria;o\_Burkholderiales;f\_Comamonadaceae

k\_Bacteria;p\_TM7;c\_TM7-3;o\_Unclassified\_TM7-3;f\_Unclassified\_TM7-3

k\_Bacteria;p\_Cyanobacteria;c\_Chloroplast;o\_Streptophyta;f\_Unclassified\_Streptophyta

k\_Bacteria;p\_Firmicutes;c\_Bacilli;o\_Lactobacillales;f\_Carnobacteriaceae

k\_Bacteria;p\_Proteobacteria;c\_Gammaproteobacteria;o\_Pseudomonadales;f\_Pseudomonadaceae

k\_Bacteria;p\_Proteobacteria;c\_Alphaproteobacteria;o\_Rhizobiales;f\_Brucellaceae

k\_Bacteria;p\_Proteobacteria;c\_Alphaproteobacteria;o\_Caulobacterales;f\_Caulobacteraceae

k\_Bacteria;p\_Actinobacteria;c\_Actinobacteria;o\_Actinomycetales;f\_Microbacteriaceae

k\_Bacteria;p\_Proteobacteria;c\_Gammaproteobacteria;o\_Pasteurellales;f\_Pasteurellaceae

k\_Bacteria;p\_Firmicutes;c\_Clostridia;o\_Clostridiales;f\_[Tissierellaceae]

k\_Bacteria;p\_Proteobacteria;c\_Alphaproteobacteria;o\_Sphingomonadales;f\_Sphingomonadaceae

k\_Bacteria;p\_Proteobacteria;c\_Gammaproteobacteria;o\_Alteromonadales;f\_[Chromatiaceae]

k\_Bacteria;p\_Firmicutes;c\_Bacilli;o\_Bacillales;f\_Staphylococcaceae

k\_Bacteria;p\_[Thermi];c\_Deinococci;o\_Thermales;f\_Thermaceae

k\_Bacteria;p\_Firmicutes;c\_Bacilli;o\_Bacillales;f\_Bacillaceae

k\_Bacteria;p\_Proteobacteria;c\_Gammaproteobacteria;o\_Aeromonadales;f\_Aeromonadaceae

k\_Bacteria;p\_Proteobacteria;c\_Alphaproteobacteria;o\_RF32;f\_Unclassified\_RF32

k\_Bacteria;p\_Firmicutes;c\_Bacilli;o\_Lactobacillales;f\_Leuconostocaceae

k\_Bacteria;p\_Bacteroidetes;c\_[Saprospirae];o\_[Saprospirales];f\_Chitinophagaceae

k\_Bacteria;p\_Actinobacteria;c\_Actinobacteria;o\_Actinomycetales;f\_Corynebacteriaceae

k\_Bacteria;p\_Acidobacteria;c\_iii1-8;o\_SJA-36;f\_Unclassified\_SJA-36

k\_Bacteria;p\_Actinobacteria;c\_Acidimicrobiia;o\_Acidimicrobiales;f\_Unclassified\_Acidimicrobiales

k\_Bacteria;p\_Proteobacteria;c\_Alphaproteobacteria;o\_Rhizobiales;f\_Bradyrhizobiaceae

k\_Bacteria;p\_Acidobacteria;c\_Acidobacteria-6;o\_iii1-15;f\_Unclassified\_iii1-15

k\_Bacteria;p\_Proteobacteria;c\_Epsilonproteobacteria;o\_Campylobacterales;f\_Helicobacteraceae

k\_Bacteria;p\_Actinobacteria;c\_Actinobacteria;o\_Actinomycetales;f\_Streptomycetaceae

k\_Bacteria;p\_Proteobacteria;c\_Betaproteobacteria;o\_Rhodocyclales;f\_Rhodocyclaceae

k\_Bacteria;p\_Proteobacteria;c\_Alphaproteobacteria;o\_Rhizobiales;f\_Methylobacteriaceae

k\_Bacteria;p\_Bacteroidetes;c\_Sphingobacteriia;o\_Sphingobacteriales;f\_Sphingobacteriaceae

k\_Bacteria;p\_Proteobacteria;c\_Alphaproteobacteria;o\_Rhizobiales;f\_Phyllobacteriaceae

k\_Bacteria;p\_Firmicutes;c\_Bacilli;o\_Gemellales;f\_Gemellaceae

k\_Bacteria;p\_Bacteroidetes;c\_Bacteroidia;o\_Bacteroidales;f\_S24-7

k\_Bacteria;p\_Verrucomicrobia;c\_Verrucomicrobiae;o\_Verrucomicrobiales;f\_Verrucomicrobiaceae

k\_Bacteria;p\_Proteobacteria;c\_Gammaproteobacteria;o\_Alteromonadales;f\_OM60

k\_Bacteria;p\_Actinobacteria;c\_Actinobacteria;o\_Actinomycetales;f\_Pseudonocardiaceae

k\_Bacteria;p\_Firmicutes;c\_Clostridia;o\_Clostridiales;f\_Christensenellaceae

k\_Bacteria;p\_Proteobacteria;c\_Alphaproteobacteria;o\_Rhodobacterales;f\_Rhodobacteraceae

k\_Bacteria;p\_Actinobacteria;c\_Acidimicrobiia;o\_Acidimicrobiales;f\_C111

k\_Bacteria;p\_Actinobacteria;c\_Actinobacteria;o\_Actinomycetales;f\_Geodermatophilaceae

k\_Bacteria;p\_Firmicutes;c\_Bacilli;o\_Lactobacillales;f\_Lactobacillaceae

k\_Bacteria;p\_Fusobacteria;c\_Fusobacteriia;o\_Fusobacteriales;f\_Leptotrichiaceae

k\_Bacteria;p\_Gemmatimonadetes;c\_Gemm-1;o\_Unclassified\_Gemm-1;f\_Unclassified\_Gemm-1

k\_Bacteria;p\_Proteobacteria;c\_Deltaproteobacteria;o\_Syntrophobacteriales;f\_Syntrophobacteraceae

k\_Bacteria;p\_Cyanobacteria;c\_Chloroplast;o\_Stramenopiles;f\_Unclassified\_Stramenopiles

k\_Bacteria;p\_Firmicutes;c\_Clostridia;o\_Clostridiales;f\_Dehalobacteriaceae

k\_Bacteria;p\_Proteobacteria;c\_Alphaproteobacteria;o\_Rhizobiales;f\_Methylocystaceae

k\_Bacteria;p\_Cyanobacteria;c\_4C0d-2;o\_MLE1-12;f\_Unclassified\_MLE1-12

k\_Bacteria;p\_Fusobacteria;c\_Fusobacteriia;o\_Fusobacteriales;f\_Fusobacteriaceae

k\_Bacteria;p\_Proteobacteria;c\_Alphaproteobacteria;o\_Rhizobiales;f\_Rhizobiaceae

k\_Bacteria;p\_Proteobacteria;c\_Alphaproteobacteria;o\_Sphingomonadales;f\_Unclassified\_Sphingomonadales
