# Supplementary material for: Effects of changes on gut microbiota in children with acute Kawasaki disease
Source: PeerJ journal article supplement (doi:10.7717/peerj.9698), 2020-08-06
Supplement: Supplemental_File.zip [file Supplemental_File.zip]

-  k\_Bacteria;p\_Firmicutes;c\_Clostridia
-  k\_Bacteria;p\_Bacteroidetes;c\_Bacteroidia
-  k\_Bacteria;p\_Proteobacteria;c\_Gammaproteobacteria
-  k\_Bacteria;p\_Firmicutes;c\_Bacilli
-  k\_Bacteria;p\_Actinobacteria;c\_Actinobacteria
-  k\_Bacteria;p\_Firmicutes;c\_Erysipelotrichi
-  k\_Bacteria;p\_Proteobacteria;c\_Betaproteobacteria
-  k\_Bacteria;p\_Actinobacteria;c\_Coriobacteriia
-  k\_Bacteria;p\_Proteobacteria;c\_Deltaproteobacteria
-  k\_Bacteria;p\_Proteobacteria;c\_Alphaproteobacteria
-  k\_Bacteria;p\_Cyanobacteria;c\_Chloroplast
-  k\_Bacteria;p\_TM7;c\_TM7-3
-  k\_Bacteria;p\_[Thermi];c\_Deinococci
-  k\_Bacteria;p\_Actinobacteria;c\_Acidimicrobiia
-  k\_Bacteria;p\_Bacteroidetes;c\_[Saprospirae]
-  k\_Bacteria;p\_Acidobacteria;c\_iii1-8
-  k\_Bacteria;p\_Acidobacteria;c\_Acidobacteria-6
-  k\_Bacteria;p\_Proteobacteria;c\_Epsilonproteobacteria
-  k\_Bacteria;p\_Bacteroidetes;c\_Sphingobacteriia
-  k\_Bacteria;p\_Verrucomicrobia;c\_Verrucomicrobiae
-  k\_Bacteria;p\_Fusobacteria;c\_Fusobacteriia
-  k\_Bacteria;p\_Gemmatimonadetes;c\_Gemm-1
-  k\_Bacteria;p\_Cyanobacteria;c\_4C0d-2
