# Supplementary material for: Effects of changes on gut microbiota in children with acute Kawasaki disease
Source: PeerJ journal article supplement (doi:10.7717/peerj.9698), 2020-08-06
Supplement: Supplemental_File.zip [file Supplemental_File.zip]

k\_Bacteria;p\_Bacteroidetes;c\_Bacteroidia;o\_Bacteroidales;f\_Bacteroidaceae;g\_Bacteroides

k\_Bacteria;p\_Firmicutes;c\_Bacilli;o\_Lactobacillales;f\_Enterococcaceae;g\_Enterococcus

k\_Bacteria;p\_Actinobacteria;c\_Actinobacteria;o\_Bifidobacteriales;f\_Bifidobacteriaceae;g\_Bifidobacterium

k\_Bacteria;p\_Proteobacteria;c\_Gammaproteobacteria;o\_Enterobacteriales;f\_Enterobacteriaceae;g\_Unclassified\_Enterobacteriaceae

k\_Bacteria;p\_Firmicutes;c\_Clostridia;o\_Clostridiales;f\_Lachnospiraceae;g\_[Ruminococcus]

k\_Bacteria;p\_Firmicutes;c\_Clostridia;o\_Clostridiales;f\_Lachnospiraceae;g\_Unclassified\_Lachnospiraceae

k\_Bacteria;p\_Firmicutes;c\_Clostridia;o\_Clostridiales;f\_Ruminococcaceae;g\_Faecalibacterium

k\_Bacteria;p\_Firmicutes;c\_Erysipelotrichi;o\_Erysipelotrichales;f\_Erysipelotrichaceae;g\_Unclassified\_Erysipelotrichaceae

k\_Bacteria;p\_Firmicutes;c\_Clostridia;o\_Clostridiales;f\_Ruminococcaceae;g\_Unclassified\_Ruminococcaceae

k\_Bacteria;p\_Proteobacteria;c\_Betaproteobacteria;o\_Burkholderiales;f\_Oxalobacteraceae;g\_Herbaspirillum

k\_Bacteria;p\_Proteobacteria;c\_Gammaproteobacteria;o\_Pseudomonadales;f\_Moraxellaceae;g\_Enhydrobacter

k\_Bacteria;p\_Firmicutes;c\_Clostridia;o\_Clostridiales;f\_Veillonellaceae;g\_Megamonas

k\_Bacteria;p\_Bacteroidetes;c\_Bacteroidia;o\_Bacteroidales;f\_Porphyromonadaceae;g\_Parabacteroides

k\_Bacteria;p\_Firmicutes;c\_Clostridia;o\_Clostridiales;f\_Unclassified\_Clostridiales;g\_Unclassified\_Clostridiales

k\_Bacteria;p\_Firmicutes;c\_Clostridia;o\_Clostridiales;f\_Lachnospiraceae;g\_Dorea

k\_Bacteria;p\_Firmicutes;c\_Clostridia;o\_Clostridiales;f\_Ruminococcaceae;g\_Oscillospira

k\_Bacteria;p\_Firmicutes;c\_Clostridia;o\_Clostridiales;f\_Ruminococcaceae;g\_Ruminococcus

k\_Bacteria;p\_Firmicutes;c\_Clostridia;o\_Clostridiales;f\_Veillonellaceae;g\_Veillonella

k\_Bacteria;p\_Proteobacteria;c\_Gammaproteobacteria;o\_Enterobacteriales;f\_Enterobacteriaceae;g\_Klebsiella

k\_Bacteria;p\_Firmicutes;c\_Clostridia;o\_Clostridiales;f\_Lachnospiraceae;g\_Blautia

k\_Bacteria;p\_Proteobacteria;c\_Betaproteobacteria;o\_Burkholderiales;f\_Alcaligenaceae;g\_Sutterella

k\_Bacteria;p\_Firmicutes;c\_Bacilli;o\_Lactobacillales;f\_Streptococcaceae;g\_Streptococcus

k\_Bacteria;p\_Bacteroidetes;c\_Bacteroidia;o\_Bacteroidales;f\_Rikenellaceae;g\_Unclassified\_Rikenellaceae

k\_Bacteria;p\_Firmicutes;c\_Clostridia;o\_Clostridiales;f\_Veillonellaceae;g\_Phascolartcobacterium

k\_Bacteria;p\_Firmicutes;c\_Clostridia;o\_Clostridiales;f\_Clostridiaceae;g\_Unclassified\_Clostridiaceae

k\_Bacteria;p\_Firmicutes;c\_Erysipelotrichi;o\_Erysipelotrichales;f\_Erysipelotrichaceae;g\_[Eubacterium]

k\_Bacteria;p\_Proteobacteria;c\_Gammaproteobacteria;o\_Enterobacteriales;f\_Enterobacteriaceae;g\_Citrobacter

k\_Bacteria;p\_Proteobacteria;c\_Gammaproteobacteria;o\_Pseudomonadales;f\_Moraxellaceae;g\_Unclassified\_Moraxellaceae

k\_Bacteria;p\_Actinobacteria;c\_Coriobacteria;o\_Coriobacteriales;f\_Coriobacteriaceae;g\_Eggerthella

k\_Bacteria;p\_Firmicutes;c\_Bacilli;o\_Lactobacillales;f\_Unclassified\_Lactobacillales;g\_Unclassified\_Lactobacillales

k\_Bacteria;p\_Firmicutes;c\_Clostridia;o\_Clostridiales;f\_Lachnospiraceae;g\_Clostridium

k\_Bacteria;p\_Actinobacteria;c\_Actinobacteria;o\_Actinomycetales;f\_Micrococcaceae;g\_Rothia

k\_Bacteria;p\_Firmicutes;c\_Clostridia;o\_Clostridiales;f\_Lachnospiraceae;g\_Robinsoniella

k\_Bacteria;p\_Firmicutes;c\_Bacilli;o\_Lactobacillales;f\_Aerococcaceae;g\_Unclassified\_Aerococcaceae

k\_Bacteria;p\_Proteobacteria;c\_Gammaproteobacteria;o\_Enterobacteriales;f\_Enterobacteriaceae;g\_Enterobacter

k\_Bacteria;p\_Firmicutes;c\_Clostridia;o\_Clostridiales;f\_Peptostreptococcaceae;g\_[Clostridium]

k\_Bacteria;p\_Firmicutes;c\_Clostridia;o\_Clostridiales;f\_Lachnospiraceae;g\_Coproccoccus

k\_Bacteria;p\_Actinobacteria;c\_Actinobacteria;o\_Actinomycetales;f\_Micrococcaceae;g\_Unclassified\_Micrococcaceae

k\_Bacteria;p\_Proteobacteria;c\_Deltaproteobacteria;o\_Desulfovibrionales;f\_Desulfovibrionaceae;g\_Bilophila

k\_Bacteria;p\_Firmicutes;c\_Clostridia;o\_Clostridiales;f\_Lachnospiraceae;g\_Roseburia

k\_Bacteria;p\_Firmicutes;c\_Clostridia;o\_Clostridiales;f\_Lachnospiraceae;g\_Lachnobacterium

k\_Bacteria;p\_Proteobacteria;c\_Gammaproteobacteria;o\_Xanthomonadales;f\_Xanthomonadaceae;g\_Stenotrophomonas

k\_Bacteria;p\_Firmicutes;c\_Clostridia;o\_Clostridiales;f\_Lachnospiraceae;g\_Lachnospira

k\_Bacteria;p\_Proteobacteria;c\_Betaproteobacteria;o\_Burkholderiales;f\_Burkholderiaceae;g\_Burkholderia

k\_Bacteria;p\_Actinobacteria;c\_Actinobacteria;o\_Actinomycetales;f\_Actinomycetaceae;g\_Actinomycetes

k\_Bacteria;p\_Firmicutes;c\_Clostridia;o\_Clostridiales;f\_[Moglibacteriaceae];g\_Unclassified\_[Moglibacteriaceae]

k\_Bacteria;p\_Firmicutes;c\_Erysipelotrichi;o\_Erysipelotrichales;f\_Erysipelotrichaceae;g\_Holdemania

k\_Bacteria;p\_Proteobacteria;c\_Betaproteobacteria;o\_Burkholderiales;f\_Unclassified\_Burkholderiales;g\_Unclassified\_Burkholderiales

k\_Bacteria;p\_Actinobacteria;c\_Coriobacteria;o\_Coriobacteriales;f\_Coriobacteriaceae;g\_Collinsella

k\_Bacteria;p\_Proteobacteria;c\_Betaproteobacteria;o\_Burkholderiales;f\_Comamonadaceae;g\_Unclassified\_Comamonadaceae

k\_Bacteria;p\_TM7;c\_TM7-3;o\_Unclassified\_TM7-3;f\_Unclassified\_TM7-3;g\_Unclassified\_TM7-3

k\_Bacteria;p\_Actinobacteria;c\_Coriobacteria;o\_Coriobacteriales;f\_Coriobacteriaceae;g\_Unclassified\_Coriobacteriaceae

k\_Bacteria;p\_Cyanobacteria;c\_Chloroplast;o\_Streptophyta;f\_Unclassified\_Streptophyta;g\_Unclassified\_Streptophyta

k\_Bacteria;p\_Firmicutes;c\_Bacilli;o\_Lactobacillales;f\_Carnobacteriaceae;g\_Granulicatella

k\_Bacteria;p\_Proteobacteria;c\_Betaproteobacteria;o\_Burkholderiales;f\_Oxalobacteriaceae;g\_Cupriavidus

k\_Bacteria;p\_Proteobacteria;o\_Rhizobiales;f\_Brucellaceae;g\_Ochrobactrum

k\_Bacteria;p\_Proteobacteria;c\_Gammaproteobacteria;o\_Pseudomonadales;f\_Pseudomonadaceae;g\_Unclassified\_Pseudomonadaceae

k\_Bacteria;p\_Actinobacteria;c\_Actinobacteria;o\_Actinomycetales;f\_Microbacteriaceae;g\_Mycetocola

k\_Bacteria;p\_Proteobacteria;c\_Gammaproteobacteria;o\_Pseudomonadales;f\_Moraxellaceae;g\_Acinetobacter

k\_Bacteria;p\_Proteobacteria;c\_Betaproteobacteria;o\_Burkholderiales;f\_Oxalobacteraceae;g\_Unclassified\_Oxalobacteraceae

k\_Bacteria;p\_Proteobacteria;c\_Alphaproteobacteria;o\_Caulobacteriales;f\_Caulobacteraceae;g\_Unclassified\_Caulobacteraceae

k\_Bacteria;p\_Proteobacteria;c\_Gammaproteobacteria;o\_Pasteurellales;f\_Pasteurellaceae;g\_Haemophilus

k\_Bacteria;p\_Proteobacteria;c\_Betaproteobacteria;o\_Burkholderiales;f\_Oxalobacteraceae;g\_Ralstonia

k\_Bacteria;p\_Firmicutes;c\_Clostridia;o\_Clostridiales;f\_Clostridiaceae;g\_Clostridium

k\_Bacteria;p\_Proteobacteria;c\_Gammaproteobacteria;o\_Alteromonadales;f\_[Chromatiaceae];g\_Unclassified\_[Chromatiaceae]

k\_Bacteria;p\_Firmicutes;c\_Clostridia;o\_Clostridiales;f\_[Tissierellaceae];g\_WAL\_1855D

k\_Bacteria;p\_Firmicutes;c\_Bacilli;o\_Lactobacillales;f\_Streptococcaceae;g\_Lactococcus

k\_Bacteria;p\_[Thermi];c\_Deinococcio\_Thermales;f\_Thermaceae;g\_Thermus

k\_Bacteria;p\_Firmicutes;c\_Clostridia;o\_Clostridiales;f\_Lachnospiraceae;g\_Epulisipiscium

k\_Bacteria;p\_Firmicutes;c\_Bacilli;o\_Bacillales;f\_Staphylococcaceae;g\_Staphylococcus

k\_Bacteria;p\_Proteobacteria;c\_Gammaproteobacteria;o\_Enterobacteriales;f\_Enterobacteriaceae;g\_Trabulsella

k\_Bacteria;p\_Firmicutes;c\_Bacilli;o\_Bacillales;f\_Bacillaceae;g\_Anaerobacillus

k\_Bacteria;p\_Proteobacteria;c\_Gammaproteobacteria;o\_Aeromonadales;f\_Aeromonadaceae;g\_Unclassified\_Aeromonadaceae

k\_Bacteria;p\_Proteobacteria;c\_Gammaproteobacteria;o\_Pseudomonadales;f\_Pseudomonadaceae;g\_Pseudomonas

k\_Bacteria;p\_Proteobacteria;c\_Alphaproteobacteria;o\_RF32;f\_Unclassified\_RF32;g\_Unclassified\_RF32

k\_Bacteria;p\_Firmicutes;c\_Clostridia;o\_Clostridiales;f\_Veillonellaceae;g\_Dialister

k\_Bacteria;p\_Proteobacteria;c\_Gammaproteobacteria;o\_Enterobacteriales;f\_Enterobacteriaceae;g\_Erwinia

k\_Bacteria;p\_Bacteroidetes;c\_[Saprosirae];o\_[Saprosirales];f\_Chitinophagaceae;g\_Sediminibacterium

k\_Bacteria;p\_Actinobacteria;c\_Actinobacteria;o\_Actinomycetales;f\_Corynebacteriaceae;g\_Corynebacterium

k\_Bacteria;p\_Firmicutes;c\_Bacilli;o\_Lactobacillales;f\_Leuconostaceae;g\_Unclassified\_Leuconostaceae

k\_Bacteria;p\_Firmicutes;c\_Clostridia;o\_Clostridiales;f\_Veillonellaceae;g\_Unclassified\_Veillonellaceae

k\_Bacteria;p\_Proteobacteria;c\_Alphaproteobacteria;o\_Sphingomonadales;f\_Sphingomonadaceae;g\_Unclassified\_Sphingomonadaceae

k\_Bacteria;p\_Firmicutes;c\_Clostridia;o\_Clostridiales;f\_Ruminococcaceae;g\_Clostridium

k\_Bacteria;p\_Acidobacteria;c\_iii1-8;o\_SJA-36;f\_Unclassified\_SJA-36;g\_Unclassified\_SJA-36

k\_Bacteria;p\_Actinobacteria;c\_Acidimicrobia;o\_Acidimicrobiales;f\_Unclassified\_Acidimicrobiales;g\_Unclassified\_Acidimicrobiales

k\_Bacteria;p\_Bacteroidetes;c\_Bacteroidia;o\_Bacteroidales;f\_Rikenellaceae;g\_Alistipes

k\_Bacteria;p\_Firmicutes;c\_Clostridia;o\_Clostridiales;f\_Ruminococcaceae;g\_Anaerotruncus

k\_Bacteria;p\_Proteobacteria;c\_Epsilonproteobacteria;o\_Campylobacterales;f\_Helicobacteraceae;g\_Wolinella

k\_Bacteria;p\_Firmicutes;c\_Bacilli;o\_Lactobacillales;f\_Streptococcaceae;g\_Unclassified\_Streptococcaceae

k\_Bacteria;p\_Proteobacteria;c\_Alphaproteobacteria;o\_Caulobacteriales;f\_Caulobacteraceae;g\_Mycoplasma

k\_Bacteria;p\_Firmicutes;c\_Bacilli;o\_Lactobacillales;f\_Enterococcaceae;g\_Vagococcus

k\_Bacteria;p\_Acidobacteria;c\_Acidobacteria-6;o\_iii1-15;f\_Unclassified\_iii1-15;g\_Unclassified\_iii1-15

k\_Bacteria;p\_Firmicutes;c\_Clostridia;o\_Clostridiales;f\_Peptostreptococcaceae;g\_Unclassified\_Peptostreptococcaceae

k\_Bacteria;p\_Actinobacteria;c\_Actinobacteria;o\_Actinomycetales;f\_Streptomycetaceae;g\_Streptomyces

k\_Bacteria;p\_Proteobacteria;c\_Alphaproteobacteria;o\_Sphingomonadales;f\_Sphingomonadaceae;g\_Sphingobium

k\_Bacteria;p\_Proteobacteria;c\_Deltaproteobacteria;o\_Desulfovibrionales;f\_Desulfovibrionaceae;g\_Unclassified\_Desulfovibrionaceae

k\_Bacteria;p\_Proteobacteria;c\_Betaproteobacteria;o\_Rhodocyclales;f\_Rhodocyclaceae;g\_Unclassified\_Rhodocyclaceae

k\_Bacteria;p\_Firmicutes;c\_Bacilli;o\_Gemellales;f\_Gemellaceae;g\_Unclassified\_Gemellaceae

k\_Bacteria;p\_Firmicutes;c\_Bacilli;o\_Lactobacillales;f\_Enterococcaceae;g\_Unclassified\_Enterococcaceae

k\_Bacteria;p\_Firmicutes;c\_Clostridia;o\_Clostridiales;f\_[Tissierellaceae];g\_Peptoniphilus

k\_Bacteria;p\_Proteobacteria;c\_Alphaproteobacteria;o\_Rhizobiales;f\_Bradyrhizobiaceae;g\_Unclassified\_Bradyrhizobiaceae

k\_Bacteria;p\_Proteobacteria;c\_Alphaproteobacteria;o\_Rhizobiales;f\_Methylobacteriaceae;g\_Methylobacterium

k\_Bacteria;p\_Actinobacteria;c\_Coriobacteriales;f\_Coriobacteriaceae;g\_Enterococcus

k\_Bacteria;p\_Bacteroidetes;c\_Sphingobacteria;o\_Sphingobacteriales;f\_Sphingobacteriaceae;g\_Sphingobacterium

k\_Bacteria;p\_Proteobacteria;c\_Betaproteobacteria;o\_Burkholderiales;f\_Comamonadaceae;g\_Ramlibacter

k\_Bacteria;p\_Proteobacteria;c\_Deltaproteobacteria;o\_Desulfovibrionales;f\_Desulfovibrionaceae;g\_Desulfovibrio

k\_Bacteria;p\_Proteobacteria;c\_Alphaproteobacteria;o\_Rhizobiales;f\_Phyllobacteriaceae;g\_Phyllobacterium

k\_Bacteria;p\_Actinobacteria;c\_Actinobacteria;o\_Actinomycetales;f\_Micrococcaceae;g\_Micrococcus

k\_Bacteria;p\_Actinobacteria;c\_Actinobacteria;o\_Actinomycetales;f\_Pseudonocardiaceae;g\_Amycolatopsis

k\_Bacteria;p\_Actinobacteria;c\_Actinobacteria;o\_Bifidobacteriales;f\_Bifidobacteriaceae;g\_Scardovia

k\_Bacteria;p\_Firmicutes;c\_Clostridia;o\_Clostridiales;f\_Christensenellaceae;g\_Christensenella

k\_Bacteria;p\_Proteobacteria;c\_Alphaproteobacteria;o\_Rhizobiales;f\_Bradyrhizobiaceae;g\_Bradyrhizobium

k\_Bacteria;p\_Proteobacteria;c\_Alphaproteobacteria;o\_Rhodobacterales;f\_Rhodobacteraceae;g\_Paracoccus

k\_Bacteria;p\_Bacteroidetes;c\_Bacteroidia;o\_Bacteroidales;f\_S24-7;g\_Unclassified\_S24-7

k\_Bacteria;p\_Proteobacteria;c\_Alphaproteobacteria;o\_Sphingomonadales;f\_Sphingomonadaceae;g\_Novosphingobium

k\_Bacteria;p\_Verrucomicrobia;c\_Verrucomicrobiae;o\_Verrucomicrobiales;f\_Verrucomicrobiaceae;g\_Akkermansia

k\_Bacteria;p\_Proteobacteria;c\_Gammaproteobacteria;o\_Alteromonadales;f\_OM60;g\_Unclassified\_OM60

k\_Bacteria;p\_Firmicutes;c\_Clostridia;o\_Clostridiales;f\_Dehalobacteriaceae;g\_Dehalobacterium

k\_Bacteria;p\_Firmicutes;c\_Clostridia;o\_Clostridiales;f\_Lachnospiraceae;g\_Oribacterium

k\_Bacteria;p\_Fusobacteria;c\_Fusobacteria;o\_Fusobacteriales;f\_Leptotrichiaceae;g\_Leptotrichia

k\_Bacteria;p\_Proteobacteria;c\_Alphaproteobacteria;o\_Rhizobiales;f\_Methylocystaceae;g\_Pleomorphomonas

k\_Bacteria;p\_Proteobacteria;c\_Betaproteobacteria;o\_Burkholderiales;f\_Burkholderiaceae;g\_Lautropia

k\_Bacteria;p\_Actinobacteria;c\_Acidimicrobia;o\_Acidimicrobiales;f\_C111;g\_Unclassified\_C111

k\_Bacteria;p\_Actinobacteria;c\_Actinobacteria;o\_Actinomycetales;f\_Geodermatophilaceae;g\_Unclassified\_Geodermatophilaceae

k\_Bacteria;p\_Actinobacteria;c\_Actinobacteria;o\_Actinomycetales;f\_Micrococcaceae;g\_Kocuria

k\_Bacteria;p\_Firmicutes;c\_Bacilli;o\_Lactobacillales;f\_Lactobacillaceae;g\_Lactobacillus

k\_Bacteria;p\_Firmicutes;c\_Clostridia;o\_Clostridiales;f\_Lachnospiraceae;g\_Anaerostipes

k\_Bacteria;p\_Gemmatimonadetes;c\_Gemm-1;o\_Unclassified\_Gemm-1;f\_Unclassified\_Gemm-1;g\_Unclassified\_Gemm-1

k\_Bacteria;p\_Proteobacteria;c\_Deltaproteobacteria;o\_Syntrophobacteriales;f\_Syntrophobacteraceae;g\_Unclassified\_Syntrophobacteraceae

k\_Bacteria;p\_Cyanobacteria;c\_Chloroplast;o\_Stramenopiles;f\_Unclassified\_Stramenopiles;g\_Unclassified\_Stramenopiles

k\_Bacteria;p\_Proteobacteria;c\_Betaproteobacteria;o\_Burkholderiales;f\_Comamonadaceae;g\_Delftia

k\_Bacteria;p\_Cyanobacteria;c\_4C0d-2;o\_MLE1-12;f\_Unclassified\_MLE1-12;g\_Unclassified\_MLE1-12

k\_Bacteria;p\_Fusobacteria;c\_Fusobacteria;o\_Fusobacteriales;f\_Fusobacteriaceae;g\_Fusobacterium

k\_Bacteria;p\_Proteobacteria;c\_Alphaproteobacteria;o\_Rhizobiales;f\_Methylobacteriaceae;g\_Unclassified\_Methylobacteriaceae

k\_Bacteria;p\_Proteobacteria;c\_Alphaproteobacteria;o\_Rhizobiales;f\_Rhizobiaceae;g\_Agrobacterium

k\_Bacteria;p\_Proteobacteria;c\_Alphaproteobacteria;o\_Sphingomonadales;f\_Unclassified\_Sphingomonadales;g\_Unclassified\_Sphingomonadales

k\_Bacteria;p\_Proteobacteria;c\_Gammaproteobacteria;o\_Enterobacteriales;f\_Enterobacteriaceae;g\_Serratia
