# Supplementary material for: Effects of changes on gut microbiota in children with acute Kawasaki disease
Source: PeerJ journal article supplement (doi:10.7717/peerj.9698), 2020-08-06
Supplement: Supplemental_File.zip [file Supplemental_File.zip]

# Constructed from biom file
#OTU ID	A662548	A661741	A657028	A623163	A623030	A618553	A611942	A508296	taxonomy
otu748	1086.0	6403.0	2656.0	0.0	86.0	12.0	10611.0	11264.0	k__Bacteria; p__Firmicutes; c__Bacilli; o__Lactobacillales; f__Enterococcaceae; g__Enterococcus; s__Unclassified_Enterococcus
otu3832	22748.0	426.0	162.0	0.0	0.0	0.0	484.0	1.0	k__Bacteria; p__Actinobacteria; c__Actinobacteria; o__Bifidobacteriales; f__Bifidobacteriaceae; g__Bifidobacterium; s__Unclassified_Bifidobacterium
otu4259	4039.0	13381.0	0.0	15.0	1.0	166.0	21.0	2.0	k__Bacteria; p__Firmicutes; c__Bacilli; o__Lactobacillales; f__Streptococcaceae; g__Streptococcus; s__Unclassified_Streptococcus
otu2370	226.0	5.0	13623.0	21.0	0.0	196.0	629.0	3.0	k__Bacteria; p__Actinobacteria; c__Actinobacteria; o__Bifidobacteriales; f__Bifidobacteriaceae; g__Bifidobacterium; s__Bifidobacterium_longum
otu5561	708.0	1130.0	498.0	7165.0	5.0	660.0	2622.0	1210.0	k__Bacteria; p__Firmicutes; c__Clostridia; o__Clostridiales; f__Lachnospiraceae; g__[Ruminococcus]; s__[Ruminococcus]_gnavus
otu201	234.0	170.0	0.0	0.0	0.0	1836.0	11347.0	0.0	k__Bacteria; p__Proteobacteria; c__Gammaproteobacteria; o__Enterobacteriales; f__Enterobacteriaceae; g__Unclassified_Enterobacteriaceae; s__Unclassified_Enterobacteriaceae
otu1635	5867.0	11.0	0.0	0.0	0.0	1.0	0.0	7016.0	k__Bacteria; p__Bacteroidetes; c__Bacteroidia; o__Bacteroidales; f__Bacteroidaceae; g__Bacteroides; s__Bacteroides_fragilis
otu2500	63.0	317.0	1.0	133.0	3420.0	392.0	4519.0	1535.0	k__Bacteria; p__Firmicutes; c__Clostridia; o__Clostridiales; f__Ruminococcaceae; g__Faecalibacterium; s__Faecalibacterium_prausnitzii
otu6812	256.0	0.0	20.0	343.0	6503.0	104.0	0.0	0.0	k__Bacteria; p__Bacteroidetes; c__Bacteroidia; o__Bacteroidales; f__Bacteroidaceae; g__Bacteroides; s__Unclassified_Bacteroides
otu5426	22.0	115.0	127.0	93.0	6008.0	114.0	614.0	83.0	k__Bacteria; p__Firmicutes; c__Erysipelotrichi; o__Erysipelotrichales; f__Erysipelotrichaceae; g__Unclassified_Erysipelotrichaceae; s__Unclassified_Erysipelotrichaceae
otu3183	45.0	10.0	0.0	1.0	5526.0	0.0	0.0	0.0	k__Bacteria; p__Proteobacteria; c__Gammaproteobacteria; o__Enterobacteriales; f__Enterobacteriaceae; g__Unclassified_Enterobacteriaceae; s__Unclassified_Enterobacteriaceae
otu7620	16.0	5.0	0.0	0.0	0.0	5491.0	8.0	0.0	k__Bacteria; p__Proteobacteria; c__Gammaproteobacteria; o__Pseudomonadales; f__Moraxellaceae; g__Enhydrobacter; s__Unclassified_Enhydrobacter
otu4333	890.0	69.0	348.0	1862.0	1.0	314.0	1132.0	0.0	k__Bacteria; p__Bacteroidetes; c__Bacteroidia; o__Bacteroidales; f__Bacteroidaceae; g__Bacteroides; s__Unclassified_Bacteroides
otu496	3.0	1.0	0.0	4156.0	1.0	0.0	0.0	0.0	k__Bacteria; p__Firmicutes; c__Clostridia; o__Clostridiales; f__Veillonellaceae; g__Megamonas; s__Unclassified_Megamonas
otu1933	0.0	12.0	3057.0	0.0	0.0	0.0	0.0	1073.0	k__Bacteria; p__Proteobacteria; c__Betaproteobacteria; o__Burkholderiales; f__Oxalobacteraceae; g__Herbaspirillum; s__Unclassified_Herbaspirillum
otu6768	3876.0	0.0	0.0	0.0	0.0	0.0	0.0	0.0	k__Bacteria; p__Actinobacteria; c__Actinobacteria; o__Bifidobacteriales; f__Bifidobacteriaceae; g__Bifidobacterium; s__Unclassified_Bifidobacterium
otu1532	2125.0	1582.0	3.0	0.0	0.0	34.0	9.0	2.0	k__Bacteria; p__Proteobacteria; c__Alphaproteobacteria; o__Rhizobiales; f__Brucellaceae; g__Ochrobactrum; s__Unclassified_Ochrobactrum
otu7568	376.0	7.0	2.0	98.0	0.0	1236.0	6.0	1696.0	k__Bacteria; p__Bacteroidetes; c__Bacteroidia; o__Bacteroidales; f__Bacteroidaceae; g__Bacteroides; s__Unclassified_Bacteroides
otu1245	408.0	2979.0	0.0	0.0	0.0	0.0	0.0	0.0	k__Bacteria; p__Firmicutes; c__Bacilli; o__Lactobacillales; f__Lactobacillaceae; g__Lactobacillus; s__Unclassified_Lactobacillus
otu235	105.0	3.0	0.0	24.0	0.0	293.0	2462.0	0.0	k__Bacteria; p__Bacteroidetes; c__Bacteroidia; o__Bacteroidales; f__Porphyromonadaceae; g__Parabacteroides; s__Parabacteroides_distasonis
otu187	36.0	58.0	0.0	541.0	40.0	765.0	1425.0	4.0	k__Bacteria; p__Firmicutes; c__Clostridia; o__Clostridiales; f__Lachnospiraceae; g__Unclassified_Lachnospiraceae; s__Unclassified_Lachnospiraceae
otu6262	352.0	2061.0	0.0	0.0	0.0	0.0	1.0	0.0	k__Bacteria; p__Firmicutes; c__Bacilli; o__Lactobacillales; f__Lactobacillaceae; g__Lactobacillus; s__Unclassified_Lactobacillus
otu1956	74.0	28.0	0.0	70.0	0.0	1689.0	223.0	0.0	k__Bacteria; p__Bacteroidetes; c__Bacteroidia; o__Bacteroidales; f__Bacteroidaceae; g__Bacteroides; s__Bacteroides_uniformis
otu206	482.0	3.0	2.0	138.0	0.0	1097.0	4.0	283.0	k__Bacteria; p__Bacteroidetes; c__Bacteroidia; o__Bacteroidales; f__Bacteroidaceae; g__Bacteroides; s__Unclassified_Bacteroides
otu4078	424.0	0.0	0.0	537.0	4.0	93.0	886.0	2.0	k__Bacteria; p__Firmicutes; c__Clostridia; o__Clostridiales; f__Lachnospiraceae; g__Unclassified_Lachnospiraceae; s__Unclassified_Lachnospiraceae
otu2037	154.0	5.0	0.0	0.0	0.0	856.0	5.0	863.0	k__Bacteria; p__Firmicutes; c__Clostridia; o__Clostridiales; f__Ruminococcaceae; g__Unclassified_Ruminococcaceae; s__Unclassified_Ruminococcaceae
otu4238	0.0	0.0	0.0	0.0	1780.0	0.0	0.0	0.0	k__Bacteria; p__Proteobacteria; c__Gammaproteobacteria; o__Enterobacteriales; f__Enterobacteriaceae; g__Unclassified_Enterobacteriaceae; s__Unclassified_Enterobacteriaceae
otu7208	609.0	963.0	2.0	0.0	0.0	35.0	3.0	0.0	k__Bacteria; p__Proteobacteria; c__Gammaproteobacteria; o__Pseudomonadales; f__Moraxellaceae; g__Acinetobacter; s__Unclassified_Acinetobacter
otu7572	0.0	5.0	0.0	561.0	0.0	505.0	277.0	217.0	k__Bacteria; p__Firmicutes; c__Clostridia; o__Clostridiales; f__Lachnospiraceae; g__Dorea; s__Unclassified_Dorea
otu2423	1.0	0.0	0.0	0.0	0.0	1544.0	1.0	0.0	k__Bacteria; p__Firmicutes; c__Clostridia; o__Clostridiales; f__Ruminococcaceae; g__Unclassified_Ruminococcaceae; s__Unclassified_Ruminococcaceae
otu39	1390.0	10.0	3.0	0.0	1.0	0.0	1.0	0.0	k__Bacteria; p__Firmicutes; c__Bacilli; o__Lactobacillales; f__Streptococcaceae; g__Lactococcus; s__Unclassified_Lactococcus
otu6093	2.0	0.0	0.0	0.0	0.0	0.0	0.0	1339.0	k__Bacteria; p__Bacteroidetes; c__Bacteroidia; o__Bacteroidales; f__Bacteroidaceae; g__Bacteroides; s__Bacteroides_fragilis
otu2271	0.0	0.0	0.0	21.0	1211.0	0.0	0.0	0.0	k__Bacteria; p__Bacteroidetes; c__Bacteroidia; o__Bacteroidales; f__Bacteroidaceae; g__Bacteroides; s__Bacteroides_ovatus
otu3532	6.0	0.0	0.0	0.0	0.0	19.0	1164.0	0.0	k__Bacteria; p__Firmicutes; c__Clostridia; o__Clostridiales; f__Veillonellaceae; g__Veillonella; s__Veillonella_dispar
otu927	687.0	460.0	2.0	0.0	0.0	10.0	1.0	1.0	k__Bacteria; p__Bacteroidetes; c__[Saprospirae]; o__[Saprospirales]; f__Chitinophagaceae; g__Sediminibacterium; s__Unclassified_Sediminibacterium
otu321	0.0	5.0	0.0	0.0	0.0	1.0	1150.0	0.0	k__Bacteria; p__Bacteroidetes; c__Bacteroidia; o__Bacteroidales; f__Bacteroidaceae; g__Bacteroides; s__Unclassified_Bacteroides
otu4893	9.0	0.0	0.0	308.0	596.0	53.0	151.0	0.0	k__Bacteria; p__Firmicutes; c__Clostridia; o__Clostridiales; f__Ruminococcaceae; g__Oscillospira; s__Unclassified_Oscillospira
otu1387	0.0	0.0	0.0	0.0	0.0	1005.0	0.0	0.0	k__Bacteria; p__Firmicutes; c__Clostridia; o__Clostridiales; f__Ruminococcaceae; g__Ruminococcus; s__Unclassified_Ruminococcus
otu4436	5.0	34.0	0.0	0.0	0.0	922.0	2.0	0.0	k__Bacteria; p__Proteobacteria; c__Betaproteobacteria; o__Burkholderiales; f__Alcaligenaceae; g__Sutterella; s__Unclassified_Sutterella
otu2696	4.0	0.0	0.0	646.0	0.0	286.0	0.0	7.0	k__Bacteria; p__Bacteroidetes; c__Bacteroidia; o__Bacteroidales; f__Bacteroidaceae; g__Bacteroides; s__Unclassified_Bacteroides
otu4640	137.0	796.0	0.0	0.0	0.0	1.0	0.0	0.0	k__Bacteria; p__Firmicutes; c__Bacilli; o__Lactobacillales; f__Lactobacillaceae; g__Lactobacillus; s__Unclassified_Lactobacillus
otu6703	0.0	0.0	934.0	0.0	0.0	0.0	0.0	0.0	k__Bacteria; p__Bacteroidetes; c__Bacteroidia; o__Bacteroidales; f__Porphyromonadaceae; g__Parabacteroides; s__Unclassified_Parabacteroides
otu4012	0.0	2.0	0.0	489.0	0.0	44.0	78.0	304.0	k__Bacteria; p__Bacteroidetes; c__Bacteroidia; o__Bacteroidales; f__Bacteroidaceae; g__Bacteroides; s__Unclassified_Bacteroides
otu1125	683.0	199.0	0.0	0.0	0.0	0.0	1.0	0.0	k__Bacteria; p__Cyanobacteria; c__Chloroplast; o__Streptophyta; f__Unclassified_Streptophyta; g__Unclassified_Streptophyta; s__Unclassified_Streptophyta
otu498	50.0	821.0	0.0	0.0	0.0	0.0	0.0	0.0	k__Bacteria; p__Firmicutes; c__Clostridia; o__Clostridiales; f__Ruminococcaceae; g__Unclassified_Ruminococcaceae; s__Unclassified_Ruminococcaceae
otu2612	93.0	0.0	0.0	322.0	197.0	101.0	141.0	0.0	k__Bacteria; p__Firmicutes; c__Clostridia; o__Clostridiales; f__Lachnospiraceae; g__Unclassified_Lachnospiraceae; s__Unclassified_Lachnospiraceae
otu2735	66.0	770.0	0.0	0.0	0.0	0.0	0.0	0.0	k__Bacteria; p__Bacteroidetes; c__Bacteroidia; o__Bacteroidales; f__S24-7; g__Unclassified_S24-7; s__Unclassified_S24-7
otu5889	56.0	2.0	1.0	0.0	0.0	756.0	3.0	0.0	k__Bacteria; p__Firmicutes; c__Clostridia; o__Clostridiales; f__Lachnospiraceae; g__Unclassified_Lachnospiraceae; s__Unclassified_Lachnospiraceae
otu1404	98.0	441.0	0.0	0.0	0.0	272.0	2.0	0.0	k__Bacteria; p__Firmicutes; c__Clostridia; o__Clostridiales; f__Lachnospiraceae; g__Unclassified_Lachnospiraceae; s__Unclassified_Lachnospiraceae
otu5211	0.0	0.0	0.0	1.0	806.0	0.0	0.0	0.0	k__Bacteria; p__Proteobacteria; c__Gammaproteobacteria; o__Enterobacteriales; f__Enterobacteriaceae; g__Klebsiella; s__Unclassified_Klebsiella
otu7062	168.0	50.0	9.0	10.0	2.0	34.0	10.0	499.0	k__Bacteria; p__Firmicutes; c__Clostridia; o__Clostridiales; f__Clostridiaceae; g__Unclassified_Clostridiaceae; s__Unclassified_Clostridiaceae
otu1183	134.0	0.0	29.0	285.0	1.0	318.0	0.0	0.0	k__Bacteria; p__Bacteroidetes; c__Bacteroidia; o__Bacteroidales; f__Bacteroidaceae; g__Bacteroides; s__Bacteroides_ovatus
otu5994	0.0	0.0	0.0	748.0	0.0	0.0	0.0	0.0	k__Bacteria; p__Firmicutes; c__Clostridia; o__Clostridiales; f__Veillonellaceae; g__Megamonas; s__Unclassified_Megamonas
otu1852	1.0	0.0	0.0	0.0	0.0	1.0	0.0	744.0	k__Bacteria; p__Bacteroidetes; c__Bacteroidia; o__Bacteroidales; f__Bacteroidaceae; g__Bacteroides; s__Unclassified_Bacteroides
otu4547	84.0	628.0	0.0	0.0	0.0	0.0	0.0	0.0	k__Bacteria; p__Firmicutes; c__Clostridia; o__Clostridiales; f__Unclassified_Clostridiales; g__Unclassified_Clostridiales; s__Unclassified_Clostridiales
otu3063	0.0	0.0	0.0	559.0	0.0	3.0	128.0	0.0	k__Bacteria; p__Firmicutes; c__Clostridia; o__Clostridiales; f__Lachnospiraceae; g__[Ruminococcus]; s__[Ruminococcus]_gnavus
otu30	19.0	5.0	0.0	5.0	0.0	641.0	1.0	0.0	k__Bacteria; p__Firmicutes; c__Clostridia; o__Clostridiales; f__Veillonellaceae; g__Phascolarctobacterium; s__Unclassified_Phascolarctobacterium
otu7712	9.0	403.0	0.0	19.0	0.0	214.0	0.0	0.0	k__Bacteria; p__Firmicutes; c__Clostridia; o__Clostridiales; f__Lachnospiraceae; g__Blautia; s__Unclassified_Blautia
otu6401	191.0	153.0	0.0	15.0	113.0	148.0	23.0	1.0	k__Bacteria; p__Actinobacteria; c__Coriobacteriia; o__Coriobacteriales; f__Coriobacteriaceae; g__Eggerthella; s__Eggerthella_lenta
otu5845	0.0	0.0	0.0	412.0	0.0	38.0	180.0	1.0	k__Bacteria; p__Firmicutes; c__Clostridia; o__Clostridiales; f__Lachnospiraceae; g__Unclassified_Lachnospiraceae; s__Unclassified_Lachnospiraceae
otu5059	81.0	538.0	0.0	0.0	0.0	0.0	0.0	0.0	k__Bacteria; p__Firmicutes; c__Bacilli; o__Lactobacillales; f__Lactobacillaceae; g__Lactobacillus; s__Unclassified_Lactobacillus
otu7518	4.0	3.0	0.0	0.0	0.0	2.0	604.0	0.0	k__Bacteria; p__Firmicutes; c__Clostridia; o__Clostridiales; f__Veillonellaceae; g__Veillonella; s__Veillonella_dispar
otu7742	362.0	4.0	0.0	0.0	0.0	211.0	0.0	0.0	k__Bacteria; p__Bacteroidetes; c__Bacteroidia; o__Bacteroidales; f__Rikenellaceae; g__Unclassified_Rikenellaceae; s__Unclassified_Rikenellaceae
otu1000	4.0	0.0	0.0	0.0	0.0	566.0	0.0	0.0	k__Bacteria; p__Firmicutes; c__Clostridia; o__Clostridiales; f__Lachnospiraceae; g__Unclassified_Lachnospiraceae; s__Unclassified_Lachnospiraceae
otu6189	59.0	506.0	1.0	0.0	0.0	0.0	0.0	0.0	k__Bacteria; p__Actinobacteria; c__Actinobacteria; o__Actinomycetales; f__Microbacteriaceae; g__Cryocola; s__Unclassified_Cryocola
otu4047	0.0	0.0	0.0	0.0	0.0	554.0	0.0	0.0	k__Bacteria; p__Bacteroidetes; c__Bacteroidia; o__Bacteroidales; f__Bacteroidaceae; g__Bacteroides; s__Unclassified_Bacteroides
otu3259	0.0	3.0	0.0	436.0	1.0	32.0	68.0	0.0	k__Bacteria; p__Bacteroidetes; c__Bacteroidia; o__Bacteroidales; f__Bacteroidaceae; g__Bacteroides; s__Unclassified_Bacteroides
otu6368	0.0	0.0	0.0	0.0	0.0	522.0	0.0	0.0	k__Bacteria; p__Firmicutes; c__Clostridia; o__Clostridiales; f__Ruminococcaceae; g__Unclassified_Ruminococcaceae; s__Unclassified_Ruminococcaceae
otu4334	4.0	0.0	0.0	420.0	0.0	24.0	61.0	0.0	k__Bacteria; p__Bacteroidetes; c__Bacteroidia; o__Bacteroidales; f__Bacteroidaceae; g__Bacteroides; s__Unclassified_Bacteroides
otu3948	1.0	0.0	0.0	189.0	1.0	83.0	0.0	226.0	k__Bacteria; p__Bacteroidetes; c__Bacteroidia; o__Bacteroidales; f__Bacteroidaceae; g__Bacteroides; s__Unclassified_Bacteroides
otu415	39.0	455.0	0.0	0.0	0.0	0.0	0.0	0.0	k__Bacteria; p__Firmicutes; c__Bacilli; o__Lactobacillales; f__Lactobacillaceae; g__Lactobacillus; s__Unclassified_Lactobacillus
otu112	391.0	97.0	0.0	0.0	0.0	1.0	0.0	0.0	k__Bacteria; p__Actinobacteria; c__Actinobacteria; o__Actinomycetales; f__Microbacteriaceae; g__Microbacterium; s__Unclassified_Microbacterium
otu2660	0.0	0.0	0.0	193.0	2.0	60.0	225.0	0.0	k__Bacteria; p__Bacteroidetes; c__Bacteroidia; o__Bacteroidales; f__Bacteroidaceae; g__Bacteroides; s__Unclassified_Bacteroides
otu3702	28.0	16.0	0.0	2.0	1.0	392.0	22.0	0.0	k__Bacteria; p__Firmicutes; c__Clostridia; o__Clostridiales; f__Ruminococcaceae; g__Faecalibacterium; s__Faecalibacterium_prausnitzii
otu5264	1.0	0.0	0.0	400.0	0.0	44.0	1.0	0.0	k__Bacteria; p__Bacteroidetes; c__Bacteroidia; o__Bacteroidales; f__Bacteroidaceae; g__Bacteroides; s__Bacteroides_ovatus
otu7107	2.0	7.0	1.0	415.0	0.0	9.0	0.0	0.0	k__Bacteria; p__Bacteroidetes; c__Bacteroidia; o__Bacteroidales; f__Bacteroidaceae; g__Bacteroides; s__Unclassified_Bacteroides
otu4984	0.0	0.0	0.0	296.0	0.0	5.0	111.0	0.0	k__Bacteria; p__Firmicutes; c__Clostridia; o__Clostridiales; f__Lachnospiraceae; g__Unclassified_Lachnospiraceae; s__Unclassified_Lachnospiraceae
otu6623	73.0	332.0	0.0	0.0	0.0	0.0	0.0	0.0	k__Bacteria; p__Firmicutes; c__Clostridia; o__Clostridiales; f__Lachnospiraceae; g__Coprococcus; s__Unclassified_Coprococcus
otu6073	34.0	7.0	0.0	0.0	0.0	362.0	0.0	0.0	k__Bacteria; p__Firmicutes; c__Clostridia; o__Clostridiales; f__Lachnospiraceae; g__Blautia; s__Unclassified_Blautia
otu2741	0.0	3.0	0.0	319.0	3.0	55.0	21.0	0.0	k__Bacteria; p__Bacteroidetes; c__Bacteroidia; o__Bacteroidales; f__Bacteroidaceae; g__Bacteroides; s__Unclassified_Bacteroides
otu6586	8.0	4.0	0.0	0.0	0.0	388.0	0.0	0.0	k__Bacteria; p__Firmicutes; c__Clostridia; o__Clostridiales; f__Ruminococcaceae; g__Unclassified_Ruminococcaceae; s__Unclassified_Ruminococcaceae
otu2573	0.0	398.0	0.0	0.0	0.0	0.0	0.0	0.0	k__Bacteria; p__Actinobacteria; c__Actinobacteria; o__Actinomycetales; f__Nocardioidaceae; g__Unclassified_Nocardioidaceae; s__Unclassified_Nocardioidaceae
otu1356	201.0	185.0	1.0	0.0	0.0	5.0	1.0	0.0	k__Bacteria; p__Actinobacteria; c__Actinobacteria; o__Actinomycetales; f__Pseudonocardiaceae; g__Amycolatopsis; s__Unclassified_Amycolatopsis
otu2231	3.0	8.0	0.0	0.0	371.0	3.0	1.0	0.0	k__Bacteria; p__Proteobacteria; c__Gammaproteobacteria; o__Enterobacteriales; f__Enterobacteriaceae; g__Citrobacter; s__Unclassified_Citrobacter
otu5068	0.0	0.0	0.0	201.0	18.0	163.0	1.0	0.0	k__Bacteria; p__Firmicutes; c__Clostridia; o__Clostridiales; f__Unclassified_Clostridiales; g__Unclassified_Clostridiales; s__Unclassified_Clostridiales
otu6860	0.0	3.0	0.0	345.0	0.0	26.0	2.0	1.0	k__Bacteria; p__Bacteroidetes; c__Bacteroidia; o__Bacteroidales; f__Bacteroidaceae; g__Bacteroides; s__Unclassified_Bacteroides
otu4836	3.0	10.0	2.0	327.0	1.0	21.0	4.0	0.0	k__Bacteria; p__Bacteroidetes; c__Bacteroidia; o__Bacteroidales; f__Bacteroidaceae; g__Bacteroides; s__Unclassified_Bacteroides
otu6321	60.0	296.0	0.0	0.0	0.0	8.0	0.0	0.0	k__Bacteria; p__Firmicutes; c__Clostridia; o__Clostridiales; f__Peptostreptococcaceae; g__Unclassified_Peptostreptococcaceae; s__Unclassified_Peptostreptococcaceae
otu2376	4.0	0.0	0.0	249.0	0.0	105.0	0.0	2.0	k__Bacteria; p__Bacteroidetes; c__Bacteroidia; o__Bacteroidales; f__Bacteroidaceae; g__Bacteroides; s__Unclassified_Bacteroides
otu7419	0.0	7.0	0.0	341.0	0.0	2.0	0.0	0.0	k__Bacteria; p__Firmicutes; c__Clostridia; o__Clostridiales; f__Lachnospiraceae; g__Unclassified_Lachnospiraceae; s__Unclassified_Lachnospiraceae
otu6326	0.0	0.0	0.0	80.0	0.0	219.0	47.0	0.0	k__Bacteria; p__Bacteroidetes; c__Bacteroidia; o__Bacteroidales; f__Bacteroidaceae; g__Bacteroides; s__Bacteroides_uniformis
otu3717	163.0	154.0	0.0	1.0	0.0	21.0	5.0	0.0	k__Bacteria; p__Proteobacteria; c__Betaproteobacteria; o__Burkholderiales; f__Unclassified_Burkholderiales; g__Unclassified_Burkholderiales; s__Unclassified_Burkholderiales
otu1471	14.0	20.0	293.0	1.0	2.0	6.0	5.0	2.0	k__Bacteria; p__Firmicutes; c__Bacilli; o__Lactobacillales; f__Streptococcaceae; g__Streptococcus; s__Unclassified_Streptococcus
otu3589	0.0	2.0	0.0	277.0	0.0	18.0	44.0	0.0	k__Bacteria; p__Bacteroidetes; c__Bacteroidia; o__Bacteroidales; f__Bacteroidaceae; g__Bacteroides; s__Unclassified_Bacteroides
otu673	44.0	172.0	0.0	1.0	0.0	51.0	65.0	0.0	k__Bacteria; p__Proteobacteria; c__Betaproteobacteria; o__Burkholderiales; f__Burkholderiaceae; g__Burkholderia; s__Unclassified_Burkholderia
otu2771	184.0	142.0	0.0	0.0	0.0	0.0	1.0	0.0	k__Bacteria; p__Proteobacteria; c__Gammaproteobacteria; o__Pseudomonadales; f__Moraxellaceae; g__Acinetobacter; s__Unclassified_Acinetobacter
otu7236	1.0	0.0	0.0	0.0	0.0	0.0	0.0	323.0	k__Bacteria; p__Bacteroidetes; c__Bacteroidia; o__Bacteroidales; f__Bacteroidaceae; g__Bacteroides; s__Bacteroides_fragilis
otu1070	306.0	13.0	0.0	0.0	0.0	1.0	0.0	0.0	k__Bacteria; p__Actinobacteria; c__Actinobacteria; o__Actinomycetales; f__Brevibacteriaceae; g__Brevibacterium; s__Brevibacterium_aureum
otu6580	0.0	0.0	0.0	306.0	0.0	14.0	0.0	0.0	k__Bacteria; p__Firmicutes; c__Clostridia; o__Clostridiales; f__Unclassified_Clostridiales; g__Unclassified_Clostridiales; s__Unclassified_Clostridiales
otu1188	200.0	115.0	0.0	0.0	0.0	0.0	0.0	0.0	k__Bacteria; p__Actinobacteria; c__Actinobacteria; o__Actinomycetales; f__Nocardiaceae; g__Rhodococcus; s__Unclassified_Rhodococcus
otu4648	301.0	0.0	0.0	7.0	5.0	0.0	0.0	0.0	k__Bacteria; p__Bacteroidetes; c__Bacteroidia; o__Bacteroidales; f__Bacteroidaceae; g__Bacteroides; s__Bacteroides_ovatus
otu6177	0.0	3.0	0.0	2.0	0.0	306.0	0.0	0.0	k__Bacteria; p__Firmicutes; c__Clostridia; o__Clostridiales; f__Ruminococcaceae; g__Oscillospira; s__Unclassified_Oscillospira
otu5412	0.0	0.0	0.0	0.0	0.0	0.0	0.0	306.0	k__Bacteria; p__Bacteroidetes; c__Bacteroidia; o__Bacteroidales; f__Bacteroidaceae; g__Bacteroides; s__Bacteroides_fragilis
otu765	179.0	0.0	0.0	0.0	0.0	126.0	0.0	0.0	k__Bacteria; p__Firmicutes; c__Erysipelotrichi; o__Erysipelotrichales; f__Erysipelotrichaceae; g__Unclassified_Erysipelotrichaceae; s__Unclassified_Erysipelotrichaceae
otu2331	2.0	5.0	0.0	0.0	0.0	293.0	1.0	0.0	k__Bacteria; p__Bacteroidetes; c__Bacteroidia; o__Bacteroidales; f__Bacteroidaceae; g__Bacteroides; s__Unclassified_Bacteroides
otu6109	19.0	13.0	197.0	0.0	0.0	0.0	0.0	65.0	k__Bacteria; p__Proteobacteria; c__Gammaproteobacteria; o__Pseudomonadales; f__Moraxellaceae; g__Unclassified_Moraxellaceae; s__Unclassified_Moraxellaceae
otu7167	0.0	0.0	0.0	291.0	1.0	0.0	0.0	0.0	k__Bacteria; p__Firmicutes; c__Clostridia; o__Clostridiales; f__Lachnospiraceae; g__Unclassified_Lachnospiraceae; s__Unclassified_Lachnospiraceae
otu5652	136.0	154.0	0.0	0.0	1.0	0.0	0.0	0.0	k__Bacteria; p__Proteobacteria; c__Gammaproteobacteria; o__Pseudomonadales; f__Moraxellaceae; g__Unclassified_Moraxellaceae; s__Unclassified_Moraxellaceae
otu6256	0.0	1.0	75.0	206.0	1.0	1.0	3.0	0.0	k__Bacteria; p__Bacteroidetes; c__Bacteroidia; o__Bacteroidales; f__Bacteroidaceae; g__Bacteroides; s__Unclassified_Bacteroides
otu7320	0.0	0.0	15.0	124.0	35.0	1.0	8.0	99.0	k__Bacteria; p__Firmicutes; c__Erysipelotrichi; o__Erysipelotrichales; f__Erysipelotrichaceae; g__[Eubacterium]; s__[Eubacterium]_dolichum
otu792	47.0	229.0	0.0	0.0	0.0	0.0	0.0	0.0	k__Bacteria; p__Firmicutes; c__Bacilli; o__Lactobacillales; f__Lactobacillaceae; g__Lactobacillus; s__Unclassified_Lactobacillus
otu4497	13.0	256.0	3.0	0.0	1.0	0.0	0.0	0.0	k__Bacteria; p__Verrucomicrobia; c__Verrucomicrobiae; o__Verrucomicrobiales; f__Verrucomicrobiaceae; g__Akkermansia; s__Akkermansia_muciniphila
otu1637	116.0	89.0	2.0	0.0	0.0	46.0	17.0	2.0	k__Bacteria; p__Proteobacteria; c__Betaproteobacteria; o__Burkholderiales; f__Comamonadaceae; g__Unclassified_Comamonadaceae; s__Unclassified_Comamonadaceae
otu1619	1.0	0.0	0.0	251.0	0.0	0.0	11.0	0.0	k__Bacteria; p__Bacteroidetes; c__Bacteroidia; o__Bacteroidales; f__Bacteroidaceae; g__Bacteroides; s__Unclassified_Bacteroides
otu7180	79.0	16.0	118.0	0.0	0.0	20.0	7.0	18.0	k__Bacteria; p__Firmicutes; c__Bacilli; o__Lactobacillales; f__Aerococcaceae; g__Unclassified_Aerococcaceae; s__Unclassified_Aerococcaceae
otu6464	3.0	1.0	14.0	7.0	0.0	4.0	214.0	1.0	k__Bacteria; p__Actinobacteria; c__Actinobacteria; o__Actinomycetales; f__Micrococcaceae; g__Rothia; s__Rothia_mucilaginosa
otu7403	0.0	0.0	0.0	142.0	0.0	101.0	0.0	0.0	k__Bacteria; p__Bacteroidetes; c__Bacteroidia; o__Bacteroidales; f__Bacteroidaceae; g__Bacteroides; s__Unclassified_Bacteroides
otu2300	0.0	0.0	0.0	0.0	233.0	0.0	0.0	0.0	k__Bacteria; p__Proteobacteria; c__Gammaproteobacteria; o__Enterobacteriales; f__Enterobacteriaceae; g__Unclassified_Enterobacteriaceae; s__Unclassified_Enterobacteriaceae
otu5166	61.0	74.0	68.0	0.0	0.0	0.0	0.0	30.0	k__Bacteria; p__Proteobacteria; c__Gammaproteobacteria; o__Xanthomonadales; f__Xanthomonadaceae; g__Stenotrophomonas; s__Unclassified_Stenotrophomonas
otu3103	0.0	0.0	0.0	108.0	1.0	5.0	118.0	0.0	k__Bacteria; p__Firmicutes; c__Clostridia; o__Clostridiales; f__Lachnospiraceae; g__Unclassified_Lachnospiraceae; s__Unclassified_Lachnospiraceae
otu5655	25.0	203.0	0.0	0.0	0.0	0.0	0.0	0.0	k__Bacteria; p__Firmicutes; c__Bacilli; o__Lactobacillales; f__Lactobacillaceae; g__Lactobacillus; s__Unclassified_Lactobacillus
otu6569	2.0	9.0	0.0	0.0	0.0	214.0	0.0	0.0	k__Bacteria; p__Bacteroidetes; c__Bacteroidia; o__Bacteroidales; f__Rikenellaceae; g__Unclassified_Rikenellaceae; s__Unclassified_Rikenellaceae
otu4141	12.0	167.0	0.0	0.0	0.0	41.0	0.0	0.0	k__Bacteria; p__Firmicutes; c__Clostridia; o__Clostridiales; f__Lachnospiraceae; g__Blautia; s__Unclassified_Blautia
otu6206	5.0	187.0	0.0	27.0	0.0	1.0	0.0	0.0	k__Bacteria; p__Firmicutes; c__Clostridia; o__Clostridiales; f__Lachnospiraceae; g__Blautia; s__Unclassified_Blautia
otu5339	1.0	4.0	0.0	5.0	0.0	9.0	196.0	0.0	k__Bacteria; p__Firmicutes; c__Clostridia; o__Clostridiales; f__Lachnospiraceae; g__Blautia; s__Blautia_producta
otu5448	1.0	17.0	1.0	12.0	0.0	182.0	1.0	0.0	k__Bacteria; p__Proteobacteria; c__Deltaproteobacteria; o__Desulfovibrionales; f__Desulfovibrionaceae; g__Bilophila; s__Unclassified_Bilophila
otu7449	78.0	135.0	0.0	0.0	0.0	0.0	0.0	0.0	k__Bacteria; p__Proteobacteria; c__Gammaproteobacteria; o__Pseudomonadales; f__Moraxellaceae; g__Acinetobacter; s__Acinetobacter_johnsonii
otu1312	126.0	84.0	0.0	1.0	0.0	0.0	0.0	0.0	k__Bacteria; p__[Thermi]; c__Deinococci; o__Thermales; f__Thermaceae; g__Thermus; s__Unclassified_Thermus
otu5196	2.0	146.0	0.0	0.0	0.0	63.0	0.0	0.0	k__Bacteria; p__Firmicutes; c__Clostridia; o__Clostridiales; f__Lachnospiraceae; g__Blautia; s__Unclassified_Blautia
otu2764	0.0	0.0	0.0	0.0	209.0	1.0	0.0	0.0	k__Bacteria; p__Proteobacteria; c__Gammaproteobacteria; o__Enterobacteriales; f__Enterobacteriaceae; g__Enterobacter; s__Enterobacter_turicensis
otu2139	106.0	96.0	0.0	0.0	0.0	2.0	0.0	1.0	k__Bacteria; p__Proteobacteria; c__Alphaproteobacteria; o__Rhizobiales; f__Rhizobiaceae; g__Agrobacterium; s__Unclassified_Agrobacterium
otu6080	132.0	63.0	1.0	0.0	1.0	7.0	0.0	0.0	k__Bacteria; p__Proteobacteria; c__Alphaproteobacteria; o__Rhizobiales; f__Bradyrhizobiaceae; g__Unclassified_Bradyrhizobiaceae; s__Unclassified_Bradyrhizobiaceae
otu3773	1.0	0.0	0.0	189.0	0.0	11.0	0.0	2.0	k__Bacteria; p__Bacteroidetes; c__Bacteroidia; o__Bacteroidales; f__Bacteroidaceae; g__Bacteroides; s__Unclassified_Bacteroides
otu3995	0.0	0.0	0.0	201.0	0.0	0.0	0.0	0.0	k__Bacteria; p__Firmicutes; c__Clostridia; o__Clostridiales; f__Veillonellaceae; g__Megamonas; s__Unclassified_Megamonas
otu7469	2.0	5.0	0.0	1.0	0.0	192.0	0.0	0.0	k__Bacteria; p__Firmicutes; c__Clostridia; o__Clostridiales; f__Lachnospiraceae; g__Unclassified_Lachnospiraceae; s__Unclassified_Lachnospiraceae
otu1043	0.0	199.0	0.0	0.0	0.0	0.0	0.0	0.0	k__Bacteria; p__Firmicutes; c__Bacilli; o__Lactobacillales; f__Lactobacillaceae; g__Lactobacillus; s__Unclassified_Lactobacillus
otu1161	23.0	174.0	0.0	0.0	0.0	0.0	0.0	0.0	k__Bacteria; p__Firmicutes; c__Bacilli; o__Lactobacillales; f__Lactobacillaceae; g__Lactobacillus; s__Unclassified_Lactobacillus
otu7034	0.0	0.0	0.0	0.0	0.0	196.0	1.0	0.0	k__Bacteria; p__Actinobacteria; c__Actinobacteria; o__Actinomycetales; f__Micrococcaceae; g__Unclassified_Micrococcaceae; s__Unclassified_Micrococcaceae
otu7294	0.0	4.0	2.0	4.0	0.0	2.0	77.0	108.0	k__Bacteria; p__Firmicutes; c__Clostridia; o__Clostridiales; f__Lachnospiraceae; g__[Ruminococcus]; s__[Ruminococcus]_gnavus
otu3342	143.0	51.0	0.0	0.0	0.0	2.0	0.0	0.0	k__Bacteria; p__Proteobacteria; c__Alphaproteobacteria; o__Sphingomonadales; f__Unclassified_Sphingomonadales; g__Unclassified_Sphingomonadales; s__Unclassified_Sphingomonadales
otu3566	0.0	0.0	0.0	0.0	23.0	1.0	172.0	0.0	k__Bacteria; p__Firmicutes; c__Clostridia; o__Clostridiales; f__Peptostreptococcaceae; g__[Clostridium]; s__[Clostridium]_difficile
otu2694	0.0	3.0	0.0	7.0	124.0	2.0	48.0	10.0	k__Bacteria; p__Firmicutes; c__Erysipelotrichi; o__Erysipelotrichales; f__Erysipelotrichaceae; g__Unclassified_Erysipelotrichaceae; s__Unclassified_Erysipelotrichaceae
otu4128	0.0	0.0	0.0	53.0	0.0	14.0	127.0	0.0	k__Bacteria; p__Bacteroidetes; c__Bacteroidia; o__Bacteroidales; f__Bacteroidaceae; g__Bacteroides; s__Unclassified_Bacteroides
otu6891	23.0	170.0	0.0	0.0	0.0	0.0	0.0	0.0	k__Bacteria; p__Firmicutes; c__Bacilli; o__Lactobacillales; f__Lactobacillaceae; g__Lactobacillus; s__Unclassified_Lactobacillus
otu7749	39.0	154.0	0.0	0.0	0.0	0.0	0.0	0.0	k__Bacteria; p__Firmicutes; c__Clostridia; o__Clostridiales; f__Unclassified_Clostridiales; g__Unclassified_Clostridiales; s__Unclassified_Clostridiales
otu2642	0.0	192.0	0.0	0.0	0.0	0.0	0.0	0.0	k__Bacteria; p__Firmicutes; c__Clostridia; o__Clostridiales; f__Ruminococcaceae; g__Unclassified_Ruminococcaceae; s__Unclassified_Ruminococcaceae
otu1495	0.0	0.0	0.0	168.0	0.0	0.0	21.0	0.0	k__Bacteria; p__Firmicutes; c__Clostridia; o__Clostridiales; f__Lachnospiraceae; g__[Ruminococcus]; s__[Ruminococcus]_gnavus
otu637	0.0	0.0	0.0	163.0	0.0	5.0	15.0	4.0	k__Bacteria; p__Firmicutes; c__Clostridia; o__Clostridiales; f__Lachnospiraceae; g__[Ruminococcus]; s__[Ruminococcus]_gnavus
otu1583	141.0	46.0	0.0	0.0	0.0	0.0	0.0	0.0	k__Bacteria; p__Proteobacteria; c__Alphaproteobacteria; o__Sphingomonadales; f__Sphingomonadaceae; g__Sphingomonas; s__Unclassified_Sphingomonas
otu7138	0.0	0.0	0.0	187.0	0.0	0.0	0.0	0.0	k__Bacteria; p__Firmicutes; c__Clostridia; o__Clostridiales; f__Lachnospiraceae; g__[Ruminococcus]; s__[Ruminococcus]_gnavus
otu4311	0.0	0.0	0.0	0.0	0.0	186.0	0.0	0.0	k__Bacteria; p__Firmicutes; c__Clostridia; o__Clostridiales; f__Ruminococcaceae; g__Ruminococcus; s__Unclassified_Ruminococcus
otu1032	12.0	171.0	0.0	0.0	0.0	0.0	0.0	0.0	k__Bacteria; p__Bacteroidetes; c__Bacteroidia; o__Bacteroidales; f__Prevotellaceae; g__Unclassified_Prevotellaceae; s__Unclassified_Prevotellaceae
otu5668	0.0	0.0	0.0	2.0	0.0	178.0	0.0	1.0	k__Bacteria; p__Bacteroidetes; c__Bacteroidia; o__Bacteroidales; f__Bacteroidaceae; g__Bacteroides; s__Unclassified_Bacteroides
otu1890	0.0	0.0	0.0	138.0	0.0	0.0	42.0	0.0	k__Bacteria; p__Firmicutes; c__Clostridia; o__Clostridiales; f__Ruminococcaceae; g__Unclassified_Ruminococcaceae; s__Unclassified_Ruminococcaceae
otu526	14.0	158.0	0.0	0.0	0.0	0.0	0.0	0.0	k__Bacteria; p__Bacteroidetes; c__Bacteroidia; o__Bacteroidales; f__S24-7; g__Unclassified_S24-7; s__Unclassified_S24-7
otu6978	0.0	0.0	0.0	70.0	0.0	102.0	0.0	0.0	k__Bacteria; p__Bacteroidetes; c__Bacteroidia; o__Bacteroidales; f__Rikenellaceae; g__Unclassified_Rikenellaceae; s__Unclassified_Rikenellaceae
otu5257	74.0	96.0	0.0	0.0	0.0	0.0	0.0	0.0	k__Bacteria; p__Proteobacteria; c__Gammaproteobacteria; o__Pseudomonadales; f__Moraxellaceae; g__Acinetobacter; s__Acinetobacter_johnsonii
otu5042	8.0	160.0	0.0	0.0	0.0	0.0	0.0	0.0	k__Bacteria; p__Firmicutes; c__Clostridia; o__Clostridiales; f__Ruminococcaceae; g__Unclassified_Ruminococcaceae; s__Unclassified_Ruminococcaceae
otu2942	0.0	0.0	0.0	0.0	165.0	0.0	0.0	0.0	k__Bacteria; p__Proteobacteria; c__Gammaproteobacteria; o__Enterobacteriales; f__Enterobacteriaceae; g__Unclassified_Enterobacteriaceae; s__Unclassified_Enterobacteriaceae
otu3397	18.0	146.0	0.0	0.0	0.0	0.0	0.0	0.0	k__Bacteria; p__Firmicutes; c__Clostridia; o__Clostridiales; f__Unclassified_Clostridiales; g__Unclassified_Clostridiales; s__Unclassified_Clostridiales
otu4910	4.0	159.0	0.0	0.0	0.0	0.0	0.0	0.0	k__Bacteria; p__Firmicutes; c__Clostridia; o__Clostridiales; f__Christensenellaceae; g__Unclassified_Christensenellaceae; s__Unclassified_Christensenellaceae
otu7383	8.0	0.0	0.0	2.0	0.0	149.0	0.0	0.0	k__Bacteria; p__Firmicutes; c__Clostridia; o__Clostridiales; f__Lachnospiraceae; g__Roseburia; s__Unclassified_Roseburia
otu4689	11.0	15.0	0.0	0.0	0.0	130.0	0.0	0.0	k__Bacteria; p__Firmicutes; c__Clostridia; o__Clostridiales; f__Ruminococcaceae; g__Unclassified_Ruminococcaceae; s__Unclassified_Ruminococcaceae
otu3973	7.0	148.0	0.0	0.0	0.0	0.0	0.0	0.0	k__Bacteria; p__Firmicutes; c__Clostridia; o__Clostridiales; f__Veillonellaceae; g__Megasphaera; s__Unclassified_Megasphaera
otu6379	0.0	0.0	0.0	0.0	0.0	0.0	0.0	155.0	k__Bacteria; p__Bacteroidetes; c__Bacteroidia; o__Bacteroidales; f__Bacteroidaceae; g__Bacteroides; s__Unclassified_Bacteroides
otu2266	5.0	0.0	0.0	0.0	0.0	149.0	0.0	0.0	k__Bacteria; p__Firmicutes; c__Clostridia; o__Clostridiales; f__Unclassified_Clostridiales; g__Unclassified_Clostridiales; s__Unclassified_Clostridiales
otu2991	18.0	5.0	15.0	16.0	0.0	51.0	48.0	1.0	k__Bacteria; p__Firmicutes; c__Bacilli; o__Lactobacillales; f__Streptococcaceae; g__Streptococcus; s__Unclassified_Streptococcus
otu2160	92.0	31.0	0.0	0.0	0.0	29.0	1.0	0.0	k__Bacteria; p__Firmicutes; c__Clostridia; o__Clostridiales; f__Ruminococcaceae; g__Unclassified_Ruminococcaceae; s__Unclassified_Ruminococcaceae
otu1600	5.0	0.0	0.0	40.0	0.0	80.0	27.0	0.0	k__Bacteria; p__Bacteroidetes; c__Bacteroidia; o__Bacteroidales; f__Bacteroidaceae; g__Bacteroides; s__Unclassified_Bacteroides
otu2622	48.0	15.0	0.0	0.0	89.0	0.0	0.0	0.0	k__Bacteria; p__Proteobacteria; c__Gammaproteobacteria; o__Enterobacteriales; f__Enterobacteriaceae; g__Unclassified_Enterobacteriaceae; s__Unclassified_Enterobacteriaceae
otu4599	72.0	74.0	1.0	0.0	0.0	1.0	0.0	3.0	k__Bacteria; p__Proteobacteria; c__Betaproteobacteria; o__Burkholderiales; f__Comamonadaceae; g__Delftia; s__Unclassified_Delftia
otu4660	0.0	0.0	0.0	130.0	0.0	0.0	21.0	0.0	k__Bacteria; p__Firmicutes; c__Clostridia; o__Clostridiales; f__Lachnospiraceae; g__Clostridium; s__Clostridium_hathewayi
otu4670	0.0	0.0	0.0	45.0	0.0	88.0	17.0	0.0	k__Bacteria; p__Bacteroidetes; c__Bacteroidia; o__Bacteroidales; f__Bacteroidaceae; g__Bacteroides; s__Bacteroides_uniformis
otu1230	110.0	39.0	0.0	0.0	0.0	0.0	0.0	0.0	k__Bacteria; p__Proteobacteria; c__Gammaproteobacteria; o__Pseudomonadales; f__Moraxellaceae; g__Acinetobacter; s__Acinetobacter_guillouiae
otu6380	0.0	2.0	0.0	0.0	0.0	147.0	0.0	0.0	k__Bacteria; p__Firmicutes; c__Clostridia; o__Clostridiales; f__Lachnospiraceae; g__Lachnobacterium; s__Unclassified_Lachnobacterium
otu3169	77.0	71.0	0.0	0.0	0.0	0.0	0.0	0.0	k__Bacteria; p__Proteobacteria; c__Alphaproteobacteria; o__Rhizobiales; f__Phyllobacteriaceae; g__Unclassified_Phyllobacteriaceae; s__Unclassified_Phyllobacteriaceae
otu4896	0.0	0.0	0.0	142.0	0.0	2.0	3.0	0.0	k__Bacteria; p__Firmicutes; c__Clostridia; o__Clostridiales; f__Lachnospiraceae; g__[Ruminococcus]; s__[Ruminococcus]_gnavus
otu6454	101.0	42.0	1.0	0.0	0.0	2.0	0.0	0.0	k__Bacteria; p__Proteobacteria; c__Alphaproteobacteria; o__Caulobacterales; f__Caulobacteraceae; g__Unclassified_Caulobacteraceae; s__Unclassified_Caulobacteraceae
otu1877	0.0	0.0	0.0	0.0	4.0	0.0	140.0	0.0	k__Bacteria; p__Firmicutes; c__Bacilli; o__Lactobacillales; f__Enterococcaceae; g__Enterococcus; s__Unclassified_Enterococcus
otu2152	0.0	2.0	0.0	0.0	28.0	0.0	74.0	40.0	k__Bacteria; p__Firmicutes; c__Clostridia; o__Clostridiales; f__Ruminococcaceae; g__Unclassified_Ruminococcaceae; s__Unclassified_Ruminococcaceae
otu644	11.0	132.0	0.0	0.0	0.0	0.0	0.0	0.0	k__Bacteria; p__Firmicutes; c__Erysipelotrichi; o__Erysipelotrichales; f__Erysipelotrichaceae; g__Allobaculum; s__Unclassified_Allobaculum
otu6781	0.0	0.0	0.0	0.0	141.0	1.0	1.0	0.0	k__Bacteria; p__Firmicutes; c__Erysipelotrichi; o__Erysipelotrichales; f__Erysipelotrichaceae; g__Unclassified_Erysipelotrichaceae; s__Unclassified_Erysipelotrichaceae
otu451	0.0	0.0	0.0	30.0	0.0	102.0	10.0	0.0	k__Bacteria; p__Bacteroidetes; c__Bacteroidia; o__Bacteroidales; f__Bacteroidaceae; g__Bacteroides; s__Unclassified_Bacteroides
otu4382	0.0	0.0	0.0	0.0	0.0	142.0	0.0	0.0	k__Bacteria; p__Firmicutes; c__Clostridia; o__Clostridiales; f__Ruminococcaceae; g__Ruminococcus; s__Ruminococcus_bromii
otu3444	39.0	13.0	1.0	34.0	0.0	5.0	49.0	0.0	k__Bacteria; p__Cyanobacteria; c__Chloroplast; o__Streptophyta; f__Unclassified_Streptophyta; g__Unclassified_Streptophyta; s__Unclassified_Streptophyta
otu12	0.0	0.0	0.0	0.0	0.0	137.0	0.0	0.0	k__Bacteria; p__Firmicutes; c__Clostridia; o__Clostridiales; f__Lachnospiraceae; g__Unclassified_Lachnospiraceae; s__Unclassified_Lachnospiraceae
otu2112	20.0	115.0	0.0	0.0	0.0	0.0	0.0	0.0	k__Bacteria; p__Firmicutes; c__Bacilli; o__Lactobacillales; f__Lactobacillaceae; g__Lactobacillus; s__Unclassified_Lactobacillus
otu356	0.0	6.0	1.0	118.0	0.0	8.0	1.0	0.0	k__Bacteria; p__Bacteroidetes; c__Bacteroidia; o__Bacteroidales; f__Bacteroidaceae; g__Bacteroides; s__Unclassified_Bacteroides
otu7491	0.0	0.0	0.0	0.0	0.0	4.0	130.0	0.0	k__Bacteria; p__Proteobacteria; c__Gammaproteobacteria; o__Enterobacteriales; f__Enterobacteriaceae; g__Unclassified_Enterobacteriaceae; s__Unclassified_Enterobacteriaceae
otu4652	24.0	30.0	0.0	0.0	0.0	78.0	0.0	0.0	k__Bacteria; p__Firmicutes; c__Clostridia; o__Clostridiales; f__Lachnospiraceae; g__Dorea; s__Unclassified_Dorea
otu6387	0.0	0.0	0.0	126.0	0.0	3.0	3.0	0.0	k__Bacteria; p__Firmicutes; c__Clostridia; o__Clostridiales; f__Lachnospiraceae; g__Unclassified_Lachnospiraceae; s__Unclassified_Lachnospiraceae
otu5800	10.0	119.0	0.0	0.0	0.0	0.0	0.0	0.0	k__Bacteria; p__Firmicutes; c__Clostridia; o__Clostridiales; f__Lachnospiraceae; g__Unclassified_Lachnospiraceae; s__Unclassified_Lachnospiraceae
otu5918	0.0	0.0	0.0	125.0	0.0	0.0	3.0	0.0	k__Bacteria; p__Bacteroidetes; c__Bacteroidia; o__Bacteroidales; f__Bacteroidaceae; g__Bacteroides; s__Unclassified_Bacteroides
otu6449	74.0	51.0	1.0	0.0	0.0	2.0	0.0	0.0	k__Bacteria; p__Cyanobacteria; c__4C0d-2; o__MLE1-12; f__Unclassified_MLE1-12; g__Unclassified_MLE1-12; s__Unclassified_MLE1-12
otu4017	0.0	0.0	0.0	2.0	0.0	125.0	0.0	0.0	k__Bacteria; p__Bacteroidetes; c__Bacteroidia; o__Bacteroidales; f__Bacteroidaceae; g__Bacteroides; s__Unclassified_Bacteroides
otu6849	5.0	121.0	0.0	0.0	0.0	0.0	0.0	0.0	k__Bacteria; p__Firmicutes; c__Clostridia; o__Clostridiales; f__Lachnospiraceae; g__Dorea; s__Unclassified_Dorea
otu2256	0.0	0.0	0.0	0.0	118.0	0.0	2.0	4.0	k__Bacteria; p__Firmicutes; c__Clostridia; o__Clostridiales; f__Ruminococcaceae; g__Unclassified_Ruminococcaceae; s__Unclassified_Ruminococcaceae
otu3668	26.0	98.0	0.0	0.0	0.0	0.0	0.0	0.0	k__Bacteria; p__Firmicutes; c__Clostridia; o__Clostridiales; f__Lachnospiraceae; g__Blautia; s__Unclassified_Blautia
otu4776	1.0	0.0	0.0	4.0	0.0	6.0	0.0	111.0	k__Bacteria; p__Bacteroidetes; c__Bacteroidia; o__Bacteroidales; f__Bacteroidaceae; g__Bacteroides; s__Unclassified_Bacteroides
otu3733	51.0	17.0	5.0	2.0	1.0	24.0	21.0	0.0	k__Bacteria; p__Proteobacteria; c__Betaproteobacteria; o__Burkholderiales; f__Oxalobacteraceae; g__Cupriavidus; s__Unclassified_Cupriavidus
otu3780	0.0	0.0	0.0	0.0	112.0	1.0	7.0	0.0	k__Bacteria; p__Firmicutes; c__Erysipelotrichi; o__Erysipelotrichales; f__Erysipelotrichaceae; g__Unclassified_Erysipelotrichaceae; s__Unclassified_Erysipelotrichaceae
otu6758	0.0	0.0	0.0	113.0	0.0	0.0	4.0	0.0	k__Bacteria; p__Firmicutes; c__Clostridia; o__Clostridiales; f__Unclassified_Clostridiales; g__Unclassified_Clostridiales; s__Unclassified_Clostridiales
otu4401	81.0	35.0	0.0	0.0	0.0	0.0	0.0	0.0	k__Bacteria; p__[Thermi]; c__Deinococci; o__Deinococcales; f__Deinococcaceae; g__Deinococcus; s__Deinococcus_geothermalis
otu5895	4.0	112.0	0.0	0.0	0.0	0.0	0.0	0.0	k__Bacteria; p__Firmicutes; c__Clostridia; o__Clostridiales; f__Ruminococcaceae; g__Unclassified_Ruminococcaceae; s__Unclassified_Ruminococcaceae
otu634	22.0	93.0	0.0	0.0	0.0	0.0	0.0	0.0	k__Bacteria; p__Firmicutes; c__Clostridia; o__Clostridiales; f__Unclassified_Clostridiales; g__Unclassified_Clostridiales; s__Unclassified_Clostridiales
otu6614	0.0	1.0	1.0	0.0	30.0	0.0	69.0	14.0	k__Bacteria; p__Firmicutes; c__Bacilli; o__Lactobacillales; f__Unclassified_Lactobacillales; g__Unclassified_Lactobacillales; s__Unclassified_Lactobacillales
otu7081	6.0	1.0	107.0	0.0	0.0	1.0	0.0	0.0	k__Bacteria; p__Firmicutes; c__Bacilli; o__Lactobacillales; f__Unclassified_Lactobacillales; g__Unclassified_Lactobacillales; s__Unclassified_Lactobacillales
otu5194	3.0	1.0	0.0	0.0	2.0	0.0	33.0	75.0	k__Bacteria; p__Firmicutes; c__Bacilli; o__Lactobacillales; f__Enterococcaceae; g__Enterococcus; s__Unclassified_Enterococcus
otu7467	0.0	0.0	0.0	0.0	0.0	4.0	109.0	0.0	k__Bacteria; p__Bacteroidetes; c__Bacteroidia; o__Bacteroidales; f__Bacteroidaceae; g__Bacteroides; s__Bacteroides_plebeius
otu2876	80.0	31.0	0.0	0.0	0.0	0.0	0.0	0.0	k__Bacteria; p__Proteobacteria; c__Alphaproteobacteria; o__Sphingomonadales; f__Sphingomonadaceae; g__Unclassified_Sphingomonadaceae; s__Unclassified_Sphingomonadaceae
otu5677	0.0	0.0	0.0	0.0	77.0	0.0	34.0	0.0	k__Bacteria; p__Firmicutes; c__Clostridia; o__Clostridiales; f__Ruminococcaceae; g__Unclassified_Ruminococcaceae; s__Unclassified_Ruminococcaceae
otu1907	0.0	0.0	0.0	102.0	0.0	0.0	7.0	0.0	k__Bacteria; p__Bacteroidetes; c__Bacteroidia; o__Bacteroidales; f__Bacteroidaceae; g__Bacteroides; s__Unclassified_Bacteroides
otu3228	0.0	2.0	0.0	15.0	0.0	1.0	84.0	7.0	k__Bacteria; p__Firmicutes; c__Clostridia; o__Clostridiales; f__Lachnospiraceae; g__Coprococcus; s__Unclassified_Coprococcus
otu4373	0.0	0.0	0.0	102.0	0.0	3.0	4.0	0.0	k__Bacteria; p__Bacteroidetes; c__Bacteroidia; o__Bacteroidales; f__Bacteroidaceae; g__Bacteroides; s__Bacteroides_uniformis
otu1808	25.0	73.0	0.0	0.0	0.0	10.0	0.0	0.0	k__Bacteria; p__Firmicutes; c__Clostridia; o__Clostridiales; f__Clostridiaceae; g__Clostridium; s__Unclassified_Clostridium
otu2758	74.0	33.0	0.0	1.0	0.0	0.0	0.0	0.0	k__Bacteria; p__Proteobacteria; c__Alphaproteobacteria; o__Rhizobiales; f__Bradyrhizobiaceae; g__Unclassified_Bradyrhizobiaceae; s__Unclassified_Bradyrhizobiaceae
otu4011	12.0	95.0	0.0	0.0	0.0	0.0	0.0	0.0	k__Bacteria; p__Firmicutes; c__Bacilli; o__Lactobacillales; f__Lactobacillaceae; g__Lactobacillus; s__Unclassified_Lactobacillus
otu782	0.0	0.0	0.0	0.0	2.0	0.0	4.0	100.0	k__Bacteria; p__Firmicutes; c__Bacilli; o__Lactobacillales; f__Enterococcaceae; g__Enterococcus; s__Unclassified_Enterococcus
otu4107	71.0	33.0	0.0	0.0	0.0	2.0	0.0	0.0	k__Bacteria; p__Proteobacteria; c__Gammaproteobacteria; o__Enterobacteriales; f__Enterobacteriaceae; g__Serratia; s__Serratia_marcescens
otu6273	0.0	0.0	0.0	105.0	1.0	0.0	0.0	0.0	k__Bacteria; p__Firmicutes; c__Clostridia; o__Clostridiales; f__Lachnospiraceae; g__[Ruminococcus]; s__[Ruminococcus]_gnavus
otu908	9.0	96.0	0.0	0.0	0.0	0.0	0.0	0.0	k__Bacteria; p__Firmicutes; c__Clostridia; o__Clostridiales; f__Lachnospiraceae; g__Blautia; s__Unclassified_Blautia
otu4597	71.0	0.0	0.0	0.0	0.0	33.0	1.0	0.0	k__Bacteria; p__Firmicutes; c__Clostridia; o__Clostridiales; f__Lachnospiraceae; g__Unclassified_Lachnospiraceae; s__Unclassified_Lachnospiraceae
otu6818	47.0	58.0	0.0	0.0	0.0	0.0	0.0	0.0	k__Bacteria; p__Proteobacteria; c__Gammaproteobacteria; o__Pseudomonadales; f__Moraxellaceae; g__Acinetobacter; s__Unclassified_Acinetobacter
otu2278	3.0	1.0	0.0	0.0	0.0	0.0	71.0	29.0	k__Bacteria; p__Firmicutes; c__Bacilli; o__Lactobacillales; f__Enterococcaceae; g__Enterococcus; s__Unclassified_Enterococcus
otu4023	12.0	92.0	0.0	0.0	0.0	0.0	0.0	0.0	k__Bacteria; p__Firmicutes; c__Bacilli; o__Lactobacillales; f__Lactobacillaceae; g__Lactobacillus; s__Unclassified_Lactobacillus
otu6307	25.0	77.0	0.0	0.0	0.0	0.0	0.0	0.0	k__Bacteria; p__Firmicutes; c__Bacilli; o__Lactobacillales; f__Lactobacillaceae; g__Lactobacillus; s__Unclassified_Lactobacillus
otu139	28.0	51.0	13.0	0.0	0.0	0.0	0.0	9.0	k__Bacteria; p__Proteobacteria; c__Alphaproteobacteria; o__Caulobacterales; f__Caulobacteraceae; g__Unclassified_Caulobacteraceae; s__Unclassified_Caulobacteraceae
otu7298	0.0	0.0	0.0	0.0	0.0	99.0	2.0	0.0	k__Bacteria; p__Firmicutes; c__Clostridia; o__Clostridiales; f__Veillonellaceae; g__Veillonella; s__Unclassified_Veillonella
otu1917	0.0	0.0	0.0	52.0	0.0	24.0	24.0	0.0	k__Bacteria; p__Bacteroidetes; c__Bacteroidia; o__Bacteroidales; f__Bacteroidaceae; g__Bacteroides; s__Unclassified_Bacteroides
otu147	1.0	25.0	0.0	73.0	0.0	0.0	0.0	0.0	k__Bacteria; p__Actinobacteria; c__Coriobacteriia; o__Coriobacteriales; f__Coriobacteriaceae; g__Collinsella; s__Collinsella_aerofaciens
otu1262	2.0	0.0	0.0	0.0	0.0	97.0	0.0	0.0	k__Bacteria; p__Firmicutes; c__Erysipelotrichi; o__Erysipelotrichales; f__Erysipelotrichaceae; g__Holdemania; s__Unclassified_Holdemania
otu3639	27.0	71.0	0.0	1.0	0.0	0.0	0.0	0.0	k__Bacteria; p__Fusobacteria; c__Fusobacteriia; o__Fusobacteriales; f__Fusobacteriaceae; g__Fusobacterium; s__Unclassified_Fusobacterium
otu1127	0.0	0.0	0.0	86.0	0.0	2.0	6.0	4.0	k__Bacteria; p__Firmicutes; c__Clostridia; o__Clostridiales; f__Lachnospiraceae; g__Dorea; s__Unclassified_Dorea
otu5886	97.0	0.0	1.0	0.0	0.0	0.0	0.0	0.0	k__Bacteria; p__Firmicutes; c__Bacilli; o__Bacillales; f__Bacillaceae; g__Anoxybacillus; s__Anoxybacillus_kestanbolensis
otu6557	0.0	0.0	0.0	0.0	92.0	0.0	0.0	6.0	k__Bacteria; p__Firmicutes; c__Clostridia; o__Clostridiales; f__Ruminococcaceae; g__Unclassified_Ruminococcaceae; s__Unclassified_Ruminococcaceae
otu4771	57.0	40.0	0.0	0.0	0.0	0.0	0.0	0.0	k__Bacteria; p__Proteobacteria; c__Betaproteobacteria; o__Burkholderiales; f__Comamonadaceae; g__Unclassified_Comamonadaceae; s__Unclassified_Comamonadaceae
otu492	0.0	0.0	0.0	10.0	0.0	83.0	3.0	0.0	k__Bacteria; p__Bacteroidetes; c__Bacteroidia; o__Bacteroidales; f__Bacteroidaceae; g__Bacteroides; s__Unclassified_Bacteroides
otu4408	0.0	0.0	0.0	0.0	95.0	0.0	0.0	0.0	k__Bacteria; p__Proteobacteria; c__Gammaproteobacteria; o__Enterobacteriales; f__Enterobacteriaceae; g__Unclassified_Enterobacteriaceae; s__Unclassified_Enterobacteriaceae
otu5067	1.0	5.0	2.0	65.0	0.0	4.0	18.0	0.0	k__Bacteria; p__Bacteroidetes; c__Bacteroidia; o__Bacteroidales; f__Bacteroidaceae; g__Bacteroides; s__Unclassified_Bacteroides
otu2797	0.0	0.0	0.0	90.0	1.0	0.0	3.0	0.0	k__Bacteria; p__Firmicutes; c__Clostridia; o__Clostridiales; f__Unclassified_Clostridiales; g__Unclassified_Clostridiales; s__Unclassified_Clostridiales
otu4540	0.0	0.0	0.0	91.0	0.0	3.0	0.0	0.0	k__Bacteria; p__Bacteroidetes; c__Bacteroidia; o__Bacteroidales; f__Bacteroidaceae; g__Bacteroides; s__Unclassified_Bacteroides
otu5376	0.0	0.0	0.0	93.0	0.0	1.0	0.0	0.0	k__Bacteria; p__Firmicutes; c__Clostridia; o__Clostridiales; f__Lachnospiraceae; g__Clostridium; s__Clostridium_hathewayi
otu5867	18.0	75.0	1.0	0.0	0.0	0.0	0.0	0.0	k__Bacteria; p__Actinobacteria; c__Actinobacteria; o__Actinomycetales; f__Corynebacteriaceae; g__Corynebacterium; s__Corynebacterium_stationis
otu1114	30.0	63.0	0.0	0.0	0.0	0.0	0.0	0.0	k__Bacteria; p__Firmicutes; c__Bacilli; o__Lactobacillales; f__Lactobacillaceae; g__Lactobacillus; s__Unclassified_Lactobacillus
otu1571	0.0	0.0	0.0	53.0	1.0	7.0	32.0	0.0	k__Bacteria; p__Firmicutes; c__Clostridia; o__Clostridiales; f__Lachnospiraceae; g__Unclassified_Lachnospiraceae; s__Unclassified_Lachnospiraceae
otu1713	0.0	0.0	0.0	0.0	0.0	0.0	93.0	0.0	k__Bacteria; p__Bacteroidetes; c__Bacteroidia; o__Bacteroidales; f__Bacteroidaceae; g__Bacteroides; s__Unclassified_Bacteroides
otu4874	0.0	0.0	0.0	6.0	56.0	3.0	11.0	17.0	k__Bacteria; p__Firmicutes; c__Clostridia; o__Clostridiales; f__Ruminococcaceae; g__Unclassified_Ruminococcaceae; s__Unclassified_Ruminococcaceae
otu3399	0.0	5.0	0.0	9.0	12.0	3.0	53.0	10.0	k__Bacteria; p__Firmicutes; c__Clostridia; o__Clostridiales; f__Ruminococcaceae; g__Unclassified_Ruminococcaceae; s__Unclassified_Ruminococcaceae
otu106	0.0	0.0	0.0	0.0	0.0	91.0	0.0	0.0	k__Bacteria; p__Firmicutes; c__Clostridia; o__Clostridiales; f__Ruminococcaceae; g__Ruminococcus; s__Unclassified_Ruminococcus
otu154	0.0	0.0	0.0	0.0	90.0	0.0	0.0	0.0	k__Bacteria; p__Proteobacteria; c__Gammaproteobacteria; o__Enterobacteriales; f__Enterobacteriaceae; g__Unclassified_Enterobacteriaceae; s__Unclassified_Enterobacteriaceae
otu1147	7.0	83.0	0.0	0.0	0.0	0.0	0.0	0.0	k__Bacteria; p__Firmicutes; c__Erysipelotrichi; o__Erysipelotrichales; f__Erysipelotrichaceae; g__Allobaculum; s__Unclassified_Allobaculum
otu1898	0.0	0.0	0.0	85.0	0.0	0.0	5.0	0.0	k__Bacteria; p__Firmicutes; c__Clostridia; o__Clostridiales; f__Lachnospiraceae; g__Unclassified_Lachnospiraceae; s__Unclassified_Lachnospiraceae
otu6748	15.0	1.0	0.0	0.0	74.0	0.0	0.0	0.0	k__Bacteria; p__Proteobacteria; c__Gammaproteobacteria; o__Enterobacteriales; f__Enterobacteriaceae; g__Klebsiella; s__Unclassified_Klebsiella
otu4438	46.0	41.0	0.0	0.0	0.0	1.0	0.0	1.0	k__Bacteria; p__Proteobacteria; c__Gammaproteobacteria; o__Pseudomonadales; f__Moraxellaceae; g__Acinetobacter; s__Unclassified_Acinetobacter
otu6364	0.0	4.0	0.0	0.0	2.0	0.0	83.0	0.0	k__Bacteria; p__Firmicutes; c__Bacilli; o__Lactobacillales; f__Enterococcaceae; g__Enterococcus; s__Unclassified_Enterococcus
otu2973	0.0	0.0	0.0	10.0	78.0	0.0	0.0	0.0	k__Bacteria; p__Bacteroidetes; c__Bacteroidia; o__Bacteroidales; f__Bacteroidaceae; g__Bacteroides; s__Bacteroides_ovatus
otu6253	23.0	65.0	0.0	0.0	0.0	0.0	0.0	0.0	k__Bacteria; p__Firmicutes; c__Clostridia; o__Clostridiales; f__Ruminococcaceae; g__Unclassified_Ruminococcaceae; s__Unclassified_Ruminococcaceae
otu426	57.0	27.0	2.0	0.0	0.0	1.0	0.0	0.0	k__Bacteria; p__Proteobacteria; c__Alphaproteobacteria; o__Rhizobiales; f__Methylobacteriaceae; g__Methylobacterium; s__Unclassified_Methylobacterium
otu7188	2.0	2.0	0.0	0.0	0.0	83.0	0.0	0.0	k__Bacteria; p__Firmicutes; c__Clostridia; o__Clostridiales; f__Lachnospiraceae; g__[Ruminococcus]; s__Unclassified_[Ruminococcus]
otu3096	0.0	0.0	0.0	4.0	81.0	1.0	0.0	0.0	k__Bacteria; p__Firmicutes; c__Clostridia; o__Clostridiales; f__Ruminococcaceae; g__Oscillospira; s__Unclassified_Oscillospira
otu3451	19.0	0.0	0.0	0.0	0.0	66.0	0.0	0.0	k__Bacteria; p__Firmicutes; c__Clostridia; o__Clostridiales; f__Lachnospiraceae; g__Lachnospira; s__Unclassified_Lachnospira
otu5131	7.0	77.0	0.0	0.0	0.0	0.0	0.0	0.0	k__Bacteria; p__Bacteroidetes; c__Bacteroidia; o__Bacteroidales; f__Prevotellaceae; g__Prevotella; s__Unclassified_Prevotella
otu7481	0.0	0.0	0.0	72.0	0.0	0.0	12.0	0.0	k__Bacteria; p__Firmicutes; c__Clostridia; o__Clostridiales; f__Lachnospiraceae; g__[Ruminococcus]; s__[Ruminococcus]_gnavus
otu204	0.0	0.0	0.0	4.0	79.0	0.0	0.0	0.0	k__Bacteria; p__Firmicutes; c__Clostridia; o__Clostridiales; f__Lachnospiraceae; g__Robinsoniella; s__Robinsoniella_peoriensis
otu3237	0.0	0.0	0.0	1.0	82.0	0.0	0.0	0.0	k__Bacteria; p__Firmicutes; c__Erysipelotrichi; o__Erysipelotrichales; f__Erysipelotrichaceae; g__Unclassified_Erysipelotrichaceae; s__Unclassified_Erysipelotrichaceae
otu3251	0.0	16.0	0.0	7.0	0.0	60.0	0.0	0.0	k__Bacteria; p__Firmicutes; c__Clostridia; o__Clostridiales; f__Lachnospiraceae; g__[Ruminococcus]; s__Unclassified_[Ruminococcus]
otu5234	0.0	0.0	57.0	23.0	0.0	3.0	0.0	0.0	k__Bacteria; p__Bacteroidetes; c__Bacteroidia; o__Bacteroidales; f__Bacteroidaceae; g__Bacteroides; s__Unclassified_Bacteroides
otu5	0.0	0.0	0.0	71.0	0.0	9.0	0.0	2.0	k__Bacteria; p__Bacteroidetes; c__Bacteroidia; o__Bacteroidales; f__Bacteroidaceae; g__Bacteroides; s__Unclassified_Bacteroides
otu571	2.0	9.0	0.0	0.0	0.0	71.0	0.0	0.0	k__Bacteria; p__Firmicutes; c__Clostridia; o__Clostridiales; f__Lachnospiraceae; g__Lachnospira; s__Unclassified_Lachnospira
otu6954	0.0	0.0	0.0	0.0	0.0	82.0	0.0	0.0	k__Bacteria; p__Firmicutes; c__Clostridia; o__Clostridiales; f__[Mogibacteriaceae]; g__Unclassified_[Mogibacteriaceae]; s__Unclassified_[Mogibacteriaceae]
otu7773	0.0	0.0	0.0	82.0	0.0	0.0	0.0	0.0	k__Bacteria; p__Firmicutes; c__Clostridia; o__Clostridiales; f__Veillonellaceae; g__Megamonas; s__Unclassified_Megamonas
otu108	0.0	0.0	0.0	17.0	0.0	3.0	61.0	0.0	k__Bacteria; p__Firmicutes; c__Clostridia; o__Clostridiales; f__Lachnospiraceae; g__[Ruminococcus]; s__[Ruminococcus]_gnavus
otu2437	6.0	0.0	0.0	54.0	0.0	21.0	0.0	0.0	k__Bacteria; p__Firmicutes; c__Clostridia; o__Clostridiales; f__Lachnospiraceae; g__Unclassified_Lachnospiraceae; s__Unclassified_Lachnospiraceae
otu2906	0.0	0.0	0.0	20.0	0.0	3.0	25.0	30.0	k__Bacteria; p__Firmicutes; c__Clostridia; o__Clostridiales; f__Lachnospiraceae; g__Unclassified_Lachnospiraceae; s__Unclassified_Lachnospiraceae
otu5888	0.0	0.0	0.0	0.0	0.0	0.0	78.0	0.0	k__Bacteria; p__Firmicutes; c__Bacilli; o__Lactobacillales; f__Enterococcaceae; g__Enterococcus; s__Unclassified_Enterococcus
otu7195	2.0	0.0	0.0	0.0	0.0	0.0	0.0	76.0	k__Bacteria; p__Bacteroidetes; c__Bacteroidia; o__Bacteroidales; f__Bacteroidaceae; g__Bacteroides; s__Bacteroides_fragilis
otu1694	18.0	59.0	0.0	0.0	0.0	0.0	0.0	0.0	k__Bacteria; p__Firmicutes; c__Clostridia; o__Clostridiales; f__Unclassified_Clostridiales; g__Unclassified_Clostridiales; s__Unclassified_Clostridiales
otu3684	1.0	0.0	0.0	2.0	0.0	11.0	63.0	0.0	k__Bacteria; p__Bacteroidetes; c__Bacteroidia; o__Bacteroidales; f__Porphyromonadaceae; g__Parabacteroides; s__Parabacteroides_distasonis
otu7658	0.0	0.0	0.0	77.0	0.0	0.0	0.0	0.0	k__Bacteria; p__Firmicutes; c__Clostridia; o__Clostridiales; f__Lachnospiraceae; g__Unclassified_Lachnospiraceae; s__Unclassified_Lachnospiraceae
otu862	13.0	0.0	0.0	1.0	0.0	61.0	1.0	0.0	k__Bacteria; p__TM7; c__TM7-3; o__Unclassified_TM7-3; f__Unclassified_TM7-3; g__Unclassified_TM7-3; s__Unclassified_TM7-3
otu1724	0.0	0.0	0.0	63.0	0.0	3.0	6.0	4.0	k__Bacteria; p__Firmicutes; c__Clostridia; o__Clostridiales; f__Lachnospiraceae; g__[Ruminococcus]; s__[Ruminococcus]_gnavus
otu1814	0.0	0.0	0.0	0.0	0.0	0.0	0.0	76.0	k__Bacteria; p__Bacteroidetes; c__Bacteroidia; o__Bacteroidales; f__Bacteroidaceae; g__Bacteroides; s__Bacteroides_fragilis
otu7019	0.0	0.0	0.0	18.0	1.0	57.0	0.0	0.0	k__Bacteria; p__Bacteroidetes; c__Bacteroidia; o__Bacteroidales; f__Bacteroidaceae; g__Bacteroides; s__Unclassified_Bacteroides
otu7275	0.0	3.0	0.0	47.0	0.0	9.0	17.0	0.0	k__Bacteria; p__Firmicutes; c__Clostridia; o__Clostridiales; f__Lachnospiraceae; g__Unclassified_Lachnospiraceae; s__Unclassified_Lachnospiraceae
otu579	1.0	21.0	0.0	49.0	0.0	4.0	0.0	0.0	k__Bacteria; p__Firmicutes; c__Clostridia; o__Clostridiales; f__Ruminococcaceae; g__Unclassified_Ruminococcaceae; s__Unclassified_Ruminococcaceae
otu687	1.0	0.0	0.0	57.0	4.0	13.0	0.0	0.0	k__Bacteria; p__Bacteroidetes; c__Bacteroidia; o__Bacteroidales; f__Bacteroidaceae; g__Bacteroides; s__Unclassified_Bacteroides
otu1497	5.0	70.0	0.0	0.0	0.0	0.0	0.0	0.0	k__Bacteria; p__Firmicutes; c__Clostridia; o__Clostridiales; f__Ruminococcaceae; g__Unclassified_Ruminococcaceae; s__Unclassified_Ruminococcaceae
otu1574	17.0	57.0	0.0	0.0	0.0	0.0	1.0	0.0	k__Bacteria; p__Bacteroidetes; c__Bacteroidia; o__Bacteroidales; f__S24-7; g__Unclassified_S24-7; s__Unclassified_S24-7
otu1879	0.0	0.0	0.0	75.0	0.0	0.0	0.0	0.0	k__Bacteria; p__Firmicutes; c__Clostridia; o__Clostridiales; f__Veillonellaceae; g__Megamonas; s__Unclassified_Megamonas
otu2651	4.0	24.0	0.0	0.0	0.0	47.0	0.0	0.0	k__Bacteria; p__Firmicutes; c__Clostridia; o__Clostridiales; f__Unclassified_Clostridiales; g__Unclassified_Clostridiales; s__Unclassified_Clostridiales
otu5129	4.0	0.0	0.0	0.0	1.0	30.0	40.0	0.0	k__Bacteria; p__Proteobacteria; c__Gammaproteobacteria; o__Enterobacteriales; f__Enterobacteriaceae; g__Unclassified_Enterobacteriaceae; s__Unclassified_Enterobacteriaceae
otu3116	0.0	3.0	6.0	0.0	2.0	0.0	25.0	38.0	k__Bacteria; p__Firmicutes; c__Bacilli; o__Lactobacillales; f__Enterococcaceae; g__Enterococcus; s__Unclassified_Enterococcus
otu3953	0.0	0.0	0.0	0.0	0.0	73.0	1.0	0.0	k__Bacteria; p__Proteobacteria; c__Gammaproteobacteria; o__Enterobacteriales; f__Enterobacteriaceae; g__Unclassified_Enterobacteriaceae; s__Unclassified_Enterobacteriaceae
otu4964	46.0	27.0	0.0	0.0	0.0	1.0	0.0	0.0	k__Bacteria; p__Firmicutes; c__Clostridia; o__Clostridiales; f__Ruminococcaceae; g__Ruminococcus; s__Unclassified_Ruminococcus
otu6179	1.0	0.0	0.0	4.0	0.0	68.0	1.0	0.0	k__Bacteria; p__Bacteroidetes; c__Bacteroidia; o__Bacteroidales; f__Bacteroidaceae; g__Bacteroides; s__Unclassified_Bacteroides
otu6906	0.0	0.0	0.0	60.0	0.0	1.0	4.0	9.0	k__Bacteria; p__Firmicutes; c__Clostridia; o__Clostridiales; f__Lachnospiraceae; g__Unclassified_Lachnospiraceae; s__Unclassified_Lachnospiraceae
otu6910	0.0	0.0	0.0	0.0	0.0	0.0	74.0	0.0	k__Bacteria; p__Firmicutes; c__Bacilli; o__Lactobacillales; f__Enterococcaceae; g__Enterococcus; s__Unclassified_Enterococcus
otu4157	1.0	0.0	0.0	26.0	0.0	27.0	0.0	19.0	k__Bacteria; p__Bacteroidetes; c__Bacteroidia; o__Bacteroidales; f__Bacteroidaceae; g__Bacteroides; s__Unclassified_Bacteroides
otu6778	2.0	0.0	0.0	32.0	0.0	39.0	0.0	0.0	k__Bacteria; p__Bacteroidetes; c__Bacteroidia; o__Bacteroidales; f__Bacteroidaceae; g__Bacteroides; s__Unclassified_Bacteroides
otu7538	8.0	32.0	0.0	0.0	0.0	33.0	0.0	0.0	k__Bacteria; p__Firmicutes; c__Clostridia; o__Clostridiales; f__Lachnospiraceae; g__Unclassified_Lachnospiraceae; s__Unclassified_Lachnospiraceae
otu1925	0.0	0.0	0.0	7.0	0.0	64.0	1.0	0.0	k__Bacteria; p__Firmicutes; c__Clostridia; o__Clostridiales; f__Lachnospiraceae; g__Unclassified_Lachnospiraceae; s__Unclassified_Lachnospiraceae
otu1987	7.0	0.0	0.0	0.0	0.0	65.0	0.0	0.0	k__Bacteria; p__Bacteroidetes; c__Bacteroidia; o__Bacteroidales; f__Rikenellaceae; g__Unclassified_Rikenellaceae; s__Unclassified_Rikenellaceae
otu2065	10.0	62.0	0.0	0.0	0.0	0.0	0.0	0.0	k__Bacteria; p__Firmicutes; c__Clostridia; o__Clostridiales; f__Unclassified_Clostridiales; g__Unclassified_Clostridiales; s__Unclassified_Clostridiales
otu4529	67.0	5.0	0.0	0.0	0.0	0.0	0.0	0.0	k__Bacteria; p__Proteobacteria; c__Gammaproteobacteria; o__Xanthomonadales; f__Xanthomonadaceae; g__Unclassified_Xanthomonadaceae; s__Unclassified_Xanthomonadaceae
otu5432	44.0	28.0	0.0	0.0	0.0	0.0	0.0	0.0	k__Bacteria; p__Proteobacteria; c__Alphaproteobacteria; o__Sphingomonadales; f__Sphingomonadaceae; g__Sphingomonas; s__Sphingomonas_asaccharolytica
otu791	0.0	0.0	0.0	71.0	0.0	0.0	0.0	0.0	k__Bacteria; p__Firmicutes; c__Clostridia; o__Clostridiales; f__Ruminococcaceae; g__Unclassified_Ruminococcaceae; s__Unclassified_Ruminococcaceae
otu3954	0.0	0.0	0.0	0.0	0.0	71.0	0.0	0.0	k__Bacteria; p__Actinobacteria; c__Coriobacteriia; o__Coriobacteriales; f__Coriobacteriaceae; g__Unclassified_Coriobacteriaceae; s__Unclassified_Coriobacteriaceae
otu3643	0.0	0.0	0.0	0.0	0.0	0.0	0.0	70.0	k__Bacteria; p__Bacteroidetes; c__Bacteroidia; o__Bacteroidales; f__Bacteroidaceae; g__Bacteroides; s__Unclassified_Bacteroides
otu6123	0.0	0.0	0.0	0.0	0.0	0.0	70.0	0.0	k__Bacteria; p__Firmicutes; c__Bacilli; o__Lactobacillales; f__Enterococcaceae; g__Enterococcus; s__Unclassified_Enterococcus
otu6879	2.0	0.0	0.0	0.0	0.0	68.0	0.0	0.0	k__Bacteria; p__Firmicutes; c__Clostridia; o__Clostridiales; f__Unclassified_Clostridiales; g__Unclassified_Clostridiales; s__Unclassified_Clostridiales
otu1160	5.0	64.0	0.0	0.0	0.0	0.0	0.0	0.0	k__Bacteria; p__Firmicutes; c__Clostridia; o__Clostridiales; f__Lachnospiraceae; g__Unclassified_Lachnospiraceae; s__Unclassified_Lachnospiraceae
otu1611	37.0	30.0	0.0	0.0	0.0	1.0	1.0	0.0	k__Bacteria; p__Proteobacteria; c__Alphaproteobacteria; o__Sphingomonadales; f__Sphingomonadaceae; g__Sphingomonas; s__Sphingomonas_azotifigens
otu2662	0.0	0.0	6.0	3.0	0.0	52.0	8.0	0.0	k__Bacteria; p__Bacteroidetes; c__Bacteroidia; o__Bacteroidales; f__Bacteroidaceae; g__Bacteroides; s__Unclassified_Bacteroides
otu3198	13.0	56.0	0.0	0.0	0.0	0.0	0.0	0.0	k__Bacteria; p__Firmicutes; c__Clostridia; o__Clostridiales; f__Unclassified_Clostridiales; g__Unclassified_Clostridiales; s__Unclassified_Clostridiales
otu2817	0.0	0.0	0.0	35.0	0.0	4.0	29.0	0.0	k__Bacteria; p__Bacteroidetes; c__Bacteroidia; o__Bacteroidales; f__Bacteroidaceae; g__Bacteroides; s__Unclassified_Bacteroides
otu5092	0.0	0.0	0.0	0.0	62.0	1.0	4.0	1.0	k__Bacteria; p__Firmicutes; c__Erysipelotrichi; o__Erysipelotrichales; f__Erysipelotrichaceae; g__Unclassified_Erysipelotrichaceae; s__Unclassified_Erysipelotrichaceae
otu5222	0.0	59.0	9.0	0.0	0.0	0.0	0.0	0.0	k__Bacteria; p__Firmicutes; c__Bacilli; o__Lactobacillales; f__Leuconostocaceae; g__Unclassified_Leuconostocaceae; s__Unclassified_Leuconostocaceae
otu5905	0.0	0.0	0.0	62.0	0.0	6.0	0.0	0.0	k__Bacteria; p__Bacteroidetes; c__Bacteroidia; o__Bacteroidales; f__Bacteroidaceae; g__Bacteroides; s__Unclassified_Bacteroides
otu6062	0.0	0.0	0.0	8.0	0.0	29.0	31.0	0.0	k__Bacteria; p__Firmicutes; c__Clostridia; o__Clostridiales; f__Ruminococcaceae; g__Ruminococcus; s__Unclassified_Ruminococcus
otu6360	0.0	0.0	0.0	56.0	0.0	3.0	9.0	0.0	k__Bacteria; p__Firmicutes; c__Clostridia; o__Clostridiales; f__Lachnospiraceae; g__Unclassified_Lachnospiraceae; s__Unclassified_Lachnospiraceae
otu6530	2.0	65.0	0.0	0.0	0.0	1.0	0.0	0.0	k__Bacteria; p__Bacteroidetes; c__Bacteroidia; o__Bacteroidales; f__S24-7; g__Unclassified_S24-7; s__Unclassified_S24-7
otu714	0.0	0.0	0.0	2.0	0.0	64.0	1.0	0.0	k__Bacteria; p__Firmicutes; c__Clostridia; o__Clostridiales; f__Lachnospiraceae; g__Unclassified_Lachnospiraceae; s__Unclassified_Lachnospiraceae
otu904	4.0	62.0	0.0	0.0	0.0	0.0	0.0	0.0	k__Bacteria; p__Firmicutes; c__Bacilli; o__Lactobacillales; f__Lactobacillaceae; g__Lactobacillus; s__Unclassified_Lactobacillus
otu1974	0.0	0.0	0.0	52.0	0.0	2.0	12.0	0.0	k__Bacteria; p__Firmicutes; c__Clostridia; o__Clostridiales; f__Lachnospiraceae; g__Dorea; s__Unclassified_Dorea
otu2533	0.0	0.0	0.0	62.0	0.0	4.0	0.0	0.0	k__Bacteria; p__Firmicutes; c__Clostridia; o__Clostridiales; f__Unclassified_Clostridiales; g__Unclassified_Clostridiales; s__Unclassified_Clostridiales
otu2653	17.0	0.0	27.0	0.0	1.0	11.0	10.0	0.0	k__Bacteria; p__Firmicutes; c__Bacilli; o__Lactobacillales; f__Carnobacteriaceae; g__Granulicatella; s__Unclassified_Granulicatella
otu5417	1.0	65.0	0.0	0.0	0.0	0.0	0.0	0.0	k__Bacteria; p__Firmicutes; c__Bacilli; o__Lactobacillales; f__Lactobacillaceae; g__Lactobacillus; s__Unclassified_Lactobacillus
otu5716	0.0	15.0	0.0	0.0	0.0	51.0	0.0	0.0	k__Bacteria; p__Firmicutes; c__Clostridia; o__Clostridiales; f__Ruminococcaceae; g__Ruminococcus; s__Unclassified_Ruminococcus
otu1149	26.0	1.0	0.0	0.0	0.0	38.0	0.0	0.0	k__Bacteria; p__Firmicutes; c__Clostridia; o__Clostridiales; f__Lachnospiraceae; g__Coprococcus; s__Unclassified_Coprococcus
otu1215	11.0	54.0	0.0	0.0	0.0	0.0	0.0	0.0	k__Bacteria; p__Firmicutes; c__Clostridia; o__Clostridiales; f__Lachnospiraceae; g__Coprococcus; s__Unclassified_Coprococcus
otu2038	0.0	0.0	0.0	0.0	65.0	0.0	0.0	0.0	k__Bacteria; p__Proteobacteria; c__Gammaproteobacteria; o__Enterobacteriales; f__Enterobacteriaceae; g__Unclassified_Enterobacteriaceae; s__Unclassified_Enterobacteriaceae
otu7577	55.0	8.0	0.0	0.0	0.0	1.0	1.0	0.0	k__Bacteria; p__Proteobacteria; c__Alphaproteobacteria; o__Caulobacterales; f__Caulobacteraceae; g__Brevundimonas; s__Brevundimonas_diminuta
otu7722	0.0	0.0	0.0	0.0	65.0	0.0	0.0	0.0	k__Bacteria; p__Proteobacteria; c__Gammaproteobacteria; o__Enterobacteriales; f__Enterobacteriaceae; g__Unclassified_Enterobacteriaceae; s__Unclassified_Enterobacteriaceae
otu1549	6.0	58.0	0.0	0.0	0.0	0.0	0.0	0.0	k__Bacteria; p__Firmicutes; c__Bacilli; o__Lactobacillales; f__Lactobacillaceae; g__Lactobacillus; s__Unclassified_Lactobacillus
otu3098	0.0	0.0	0.0	1.0	0.0	62.0	0.0	0.0	k__Bacteria; p__Firmicutes; c__Clostridia; o__Clostridiales; f__Lachnospiraceae; g__Unclassified_Lachnospiraceae; s__Unclassified_Lachnospiraceae
otu3191	0.0	0.0	0.0	0.0	5.0	0.0	5.0	53.0	k__Bacteria; p__Firmicutes; c__Bacilli; o__Lactobacillales; f__Enterococcaceae; g__Enterococcus; s__Unclassified_Enterococcus
otu5441	0.0	0.0	0.0	8.0	0.0	5.0	50.0	0.0	k__Bacteria; p__Bacteroidetes; c__Bacteroidia; o__Bacteroidales; f__Porphyromonadaceae; g__Parabacteroides; s__Parabacteroides_distasonis
otu2571	15.0	47.0	0.0	0.0	0.0	0.0	0.0	0.0	k__Bacteria; p__Firmicutes; c__Bacilli; o__Lactobacillales; f__Lactobacillaceae; g__Lactobacillus; s__Unclassified_Lactobacillus
otu2970	0.0	0.0	0.0	0.0	2.0	0.0	2.0	57.0	k__Bacteria; p__Bacteroidetes; c__Bacteroidia; o__Bacteroidales; f__Bacteroidaceae; g__Bacteroides; s__Bacteroides_fragilis
otu3172	0.0	0.0	0.0	45.0	0.0	16.0	0.0	0.0	k__Bacteria; p__Bacteroidetes; c__Bacteroidia; o__Bacteroidales; f__Bacteroidaceae; g__Bacteroides; s__Unclassified_Bacteroides
otu3565	19.0	42.0	0.0	0.0	0.0	0.0	0.0	0.0	k__Bacteria; p__Bacteroidetes; c__Bacteroidia; o__Bacteroidales; f__S24-7; g__Unclassified_S24-7; s__Unclassified_S24-7
otu4735	0.0	0.0	0.0	0.0	47.0	0.0	14.0	0.0	k__Bacteria; p__Firmicutes; c__Clostridia; o__Clostridiales; f__Ruminococcaceae; g__Faecalibacterium; s__Faecalibacterium_prausnitzii
otu5868	0.0	0.0	0.0	0.0	0.0	61.0	0.0	0.0	k__Bacteria; p__Firmicutes; c__Clostridia; o__Clostridiales; f__Lachnospiraceae; g__Unclassified_Lachnospiraceae; s__Unclassified_Lachnospiraceae
otu517	0.0	13.0	0.0	2.0	0.0	45.0	0.0	0.0	k__Bacteria; p__Firmicutes; c__Clostridia; o__Clostridiales; f__Lachnospiraceae; g__Unclassified_Lachnospiraceae; s__Unclassified_Lachnospiraceae
otu2613	0.0	0.0	0.0	0.0	0.0	31.0	29.0	0.0	k__Bacteria; p__Bacteroidetes; c__Bacteroidia; o__Bacteroidales; f__Bacteroidaceae; g__Bacteroides; s__Bacteroides_uniformis
otu4406	0.0	0.0	0.0	57.0	0.0	0.0	3.0	0.0	k__Bacteria; p__Firmicutes; c__Clostridia; o__Clostridiales; f__Lachnospiraceae; g__[Ruminococcus]; s__[Ruminococcus]_gnavus
otu5085	0.0	0.0	0.0	0.0	0.0	0.0	60.0	0.0	k__Bacteria; p__Bacteroidetes; c__Bacteroidia; o__Bacteroidales; f__Bacteroidaceae; g__Bacteroides; s__Unclassified_Bacteroides
otu5496	0.0	0.0	0.0	47.0	0.0	2.0	11.0	0.0	k__Bacteria; p__Firmicutes; c__Clostridia; o__Clostridiales; f__Lachnospiraceae; g__Unclassified_Lachnospiraceae; s__Unclassified_Lachnospiraceae
otu6960	0.0	0.0	0.0	60.0	0.0	0.0	0.0	0.0	k__Bacteria; p__Firmicutes; c__Clostridia; o__Clostridiales; f__Unclassified_Clostridiales; g__Unclassified_Clostridiales; s__Unclassified_Clostridiales
otu7753	19.0	35.0	3.0	0.0	0.0	0.0	3.0	0.0	k__Bacteria; p__Proteobacteria; c__Gammaproteobacteria; o__Pseudomonadales; f__Pseudomonadaceae; g__Pseudomonas; s__Unclassified_Pseudomonas
otu476	0.0	0.0	0.0	59.0	0.0	0.0	0.0	0.0	k__Bacteria; p__Firmicutes; c__Clostridia; o__Clostridiales; f__Lachnospiraceae; g__[Ruminococcus]; s__[Ruminococcus]_gnavus
otu950	0.0	0.0	0.0	0.0	59.0	0.0	0.0	0.0	k__Bacteria; p__Proteobacteria; c__Gammaproteobacteria; o__Enterobacteriales; f__Enterobacteriaceae; g__Unclassified_Enterobacteriaceae; s__Unclassified_Enterobacteriaceae
otu1482	0.0	0.0	0.0	7.0	0.0	11.0	41.0	0.0	k__Bacteria; p__Bacteroidetes; c__Bacteroidia; o__Bacteroidales; f__Bacteroidaceae; g__Bacteroides; s__Unclassified_Bacteroides
otu2208	6.0	53.0	0.0	0.0	0.0	0.0	0.0	0.0	k__Bacteria; p__Firmicutes; c__Clostridia; o__Clostridiales; f__Lachnospiraceae; g__Unclassified_Lachnospiraceae; s__Unclassified_Lachnospiraceae
otu3369	0.0	0.0	0.0	0.0	0.0	0.0	0.0	59.0	k__Bacteria; p__Bacteroidetes; c__Bacteroidia; o__Bacteroidales; f__Bacteroidaceae; g__Bacteroides; s__Bacteroides_fragilis
otu3757	0.0	0.0	0.0	3.0	38.0	2.0	15.0	1.0	k__Bacteria; p__Firmicutes; c__Clostridia; o__Clostridiales; f__Ruminococcaceae; g__Unclassified_Ruminococcaceae; s__Unclassified_Ruminococcaceae
otu4785	14.0	45.0	0.0	0.0	0.0	0.0	0.0	0.0	k__Bacteria; p__Firmicutes; c__Clostridia; o__Clostridiales; f__Lachnospiraceae; g__Unclassified_Lachnospiraceae; s__Unclassified_Lachnospiraceae
otu6302	25.0	17.0	11.0	0.0	0.0	6.0	0.0	0.0	k__Bacteria; p__Firmicutes; c__Bacilli; o__Bacillales; f__Staphylococcaceae; g__Staphylococcus; s__Unclassified_Staphylococcus
otu1348	0.0	58.0	0.0	0.0	0.0	0.0	0.0	0.0	k__Bacteria; p__Firmicutes; c__Clostridia; o__Clostridiales; f__Unclassified_Clostridiales; g__Unclassified_Clostridiales; s__Unclassified_Clostridiales
otu1660	6.0	7.0	0.0	0.0	0.0	45.0	0.0	0.0	k__Bacteria; p__Firmicutes; c__Clostridia; o__Clostridiales; f__Ruminococcaceae; g__Oscillospira; s__Unclassified_Oscillospira
otu1848	4.0	47.0	6.0	0.0	0.0	0.0	0.0	1.0	k__Bacteria; p__Proteobacteria; c__Betaproteobacteria; o__Burkholderiales; f__Unclassified_Burkholderiales; g__Unclassified_Burkholderiales; s__Unclassified_Burkholderiales
otu5113	0.0	0.0	0.0	0.0	0.0	11.0	0.0	47.0	k__Bacteria; p__Firmicutes; c__Clostridia; o__Clostridiales; f__Ruminococcaceae; g__Unclassified_Ruminococcaceae; s__Unclassified_Ruminococcaceae
otu7060	4.0	54.0	0.0	0.0	0.0	0.0	0.0	0.0	k__Bacteria; p__Firmicutes; c__Bacilli; o__Lactobacillales; f__Lactobacillaceae; g__Lactobacillus; s__Unclassified_Lactobacillus
otu952	8.0	49.0	0.0	0.0	0.0	0.0	0.0	0.0	k__Bacteria; p__Firmicutes; c__Bacilli; o__Lactobacillales; f__Lactobacillaceae; g__Lactobacillus; s__Unclassified_Lactobacillus
otu2172	25.0	32.0	0.0	0.0	0.0	0.0	0.0	0.0	k__Bacteria; p__Firmicutes; c__Clostridia; o__Clostridiales; f__[Mogibacteriaceae]; g__Unclassified_[Mogibacteriaceae]; s__Unclassified_[Mogibacteriaceae]
otu3334	0.0	0.0	0.0	0.0	0.0	0.0	0.0	57.0	k__Bacteria; p__Bacteroidetes; c__Bacteroidia; o__Bacteroidales; f__Bacteroidaceae; g__Bacteroides; s__Bacteroides_fragilis
otu4337	21.0	20.0	0.0	0.0	16.0	0.0	0.0	0.0	k__Bacteria; p__Proteobacteria; c__Gammaproteobacteria; o__Enterobacteriales; f__Enterobacteriaceae; g__Unclassified_Enterobacteriaceae; s__Unclassified_Enterobacteriaceae
otu495	0.0	0.0	1.0	47.0	0.0	1.0	6.0	1.0	k__Bacteria; p__Firmicutes; c__Clostridia; o__Clostridiales; f__Lachnospiraceae; g__[Ruminococcus]; s__[Ruminococcus]_gnavus
otu6398	0.0	0.0	0.0	7.0	42.0	1.0	6.0	0.0	k__Bacteria; p__Firmicutes; c__Erysipelotrichi; o__Erysipelotrichales; f__Erysipelotrichaceae; g__Unclassified_Erysipelotrichaceae; s__Unclassified_Erysipelotrichaceae
otu1385	3.0	0.0	0.0	0.0	0.0	0.0	0.0	52.0	k__Bacteria; p__Bacteroidetes; c__Bacteroidia; o__Bacteroidales; f__Bacteroidaceae; g__Bacteroides; s__Bacteroides_fragilis
otu4211	0.0	0.0	0.0	0.0	45.0	1.0	9.0	0.0	k__Bacteria; p__Firmicutes; c__Clostridia; o__Clostridiales; f__Ruminococcaceae; g__Unclassified_Ruminococcaceae; s__Unclassified_Ruminococcaceae
otu7226	0.0	0.0	0.0	20.0	0.0	2.0	33.0	0.0	k__Bacteria; p__Firmicutes; c__Clostridia; o__Clostridiales; f__Lachnospiraceae; g__Blautia; s__Blautia_producta
otu7542	1.0	0.0	0.0	0.0	0.0	0.0	0.0	54.0	k__Bacteria; p__Bacteroidetes; c__Bacteroidia; o__Bacteroidales; f__Bacteroidaceae; g__Bacteroides; s__Bacteroides_fragilis
otu480	0.0	0.0	0.0	54.0	0.0	0.0	0.0	0.0	k__Bacteria; p__Firmicutes; c__Clostridia; o__Clostridiales; f__Lachnospiraceae; g__Unclassified_Lachnospiraceae; s__Unclassified_Lachnospiraceae
otu2934	0.0	9.0	0.0	0.0	0.0	45.0	0.0	0.0	k__Bacteria; p__Actinobacteria; c__Actinobacteria; o__Actinomycetales; f__Microbacteriaceae; g__Mycetocola; s__Unclassified_Mycetocola
otu3628	0.0	0.0	0.0	1.0	53.0	0.0	0.0	0.0	k__Bacteria; p__Firmicutes; c__Clostridia; o__Clostridiales; f__Ruminococcaceae; g__Oscillospira; s__Unclassified_Oscillospira
otu5602	1.0	4.0	0.0	0.0	0.0	49.0	0.0	0.0	k__Bacteria; p__Firmicutes; c__Clostridia; o__Clostridiales; f__Lachnospiraceae; g__[Ruminococcus]; s__[Ruminococcus]_gnavus
otu7099	0.0	1.0	0.0	0.0	3.0	0.0	50.0	0.0	k__Bacteria; p__Firmicutes; c__Bacilli; o__Lactobacillales; f__Enterococcaceae; g__Enterococcus; s__Unclassified_Enterococcus
otu7703	0.0	0.0	0.0	0.0	0.0	54.0	0.0	0.0	k__Bacteria; p__Bacteroidetes; c__Bacteroidia; o__Bacteroidales; f__Bacteroidaceae; g__Bacteroides; s__Unclassified_Bacteroides
otu5459	0.0	0.0	0.0	29.0	0.0	2.0	22.0	0.0	k__Bacteria; p__Firmicutes; c__Clostridia; o__Clostridiales; f__Lachnospiraceae; g__Unclassified_Lachnospiraceae; s__Unclassified_Lachnospiraceae
otu3452	0.0	0.0	0.0	48.0	0.0	1.0	3.0	0.0	k__Bacteria; p__Bacteroidetes; c__Bacteroidia; o__Bacteroidales; f__Bacteroidaceae; g__Bacteroides; s__Unclassified_Bacteroides
otu4738	0.0	0.0	0.0	0.0	0.0	51.0	1.0	0.0	k__Bacteria; p__Proteobacteria; c__Gammaproteobacteria; o__Pseudomonadales; f__Moraxellaceae; g__Enhydrobacter; s__Unclassified_Enhydrobacter
otu5005	0.0	0.0	2.0	19.0	0.0	19.0	6.0	6.0	k__Bacteria; p__Actinobacteria; c__Actinobacteria; o__Actinomycetales; f__Actinomycetaceae; g__Actinomyces; s__Unclassified_Actinomyces
otu6508	0.0	0.0	0.0	0.0	0.0	52.0	0.0	0.0	k__Bacteria; p__Firmicutes; c__Clostridia; o__Clostridiales; f__Ruminococcaceae; g__Unclassified_Ruminococcaceae; s__Unclassified_Ruminococcaceae
otu7306	0.0	0.0	0.0	40.0	0.0	2.0	10.0	0.0	k__Bacteria; p__Firmicutes; c__Clostridia; o__Clostridiales; f__Lachnospiraceae; g__Dorea; s__Unclassified_Dorea
otu1383	11.0	40.0	0.0	0.0	0.0	0.0	0.0	0.0	k__Bacteria; p__Firmicutes; c__Bacilli; o__Lactobacillales; f__Lactobacillaceae; g__Lactobacillus; s__Unclassified_Lactobacillus
otu2667	0.0	0.0	0.0	35.0	0.0	16.0	0.0	0.0	k__Bacteria; p__Bacteroidetes; c__Bacteroidia; o__Bacteroidales; f__Bacteroidaceae; g__Bacteroides; s__Unclassified_Bacteroides
otu656	33.0	16.0	0.0	0.0	0.0	1.0	0.0	0.0	k__Bacteria; p__Proteobacteria; c__Alphaproteobacteria; o__Rhizobiales; f__Methylobacteriaceae; g__Unclassified_Methylobacteriaceae; s__Unclassified_Methylobacteriaceae
otu1145	0.0	0.0	0.0	2.0	0.0	1.0	47.0	0.0	k__Bacteria; p__Firmicutes; c__Clostridia; o__Clostridiales; f__Lachnospiraceae; g__Unclassified_Lachnospiraceae; s__Unclassified_Lachnospiraceae
otu3143	0.0	0.0	0.0	6.0	44.0	0.0	0.0	0.0	k__Bacteria; p__Firmicutes; c__Erysipelotrichi; o__Erysipelotrichales; f__Erysipelotrichaceae; g__Unclassified_Erysipelotrichaceae; s__Unclassified_Erysipelotrichaceae
otu3680	10.0	40.0	0.0	0.0	0.0	0.0	0.0	0.0	k__Bacteria; p__Firmicutes; c__Clostridia; o__Clostridiales; f__Christensenellaceae; g__Unclassified_Christensenellaceae; s__Unclassified_Christensenellaceae
otu3889	5.0	0.0	0.0	37.0	0.0	6.0	2.0	0.0	k__Bacteria; p__Bacteroidetes; c__Bacteroidia; o__Bacteroidales; f__Bacteroidaceae; g__Bacteroides; s__Unclassified_Bacteroides
otu6878	0.0	0.0	0.0	50.0	0.0	0.0	0.0	0.0	k__Bacteria; p__Firmicutes; c__Clostridia; o__Clostridiales; f__Unclassified_Clostridiales; g__Unclassified_Clostridiales; s__Unclassified_Clostridiales
otu7755	41.0	6.0	0.0	0.0	0.0	3.0	0.0	0.0	k__Bacteria; p__Proteobacteria; c__Alphaproteobacteria; o__Rhizobiales; f__Methylobacteriaceae; g__Methylobacterium; s__Unclassified_Methylobacterium
otu173	34.0	14.0	0.0	0.0	0.0	1.0	0.0	0.0	k__Bacteria; p__Proteobacteria; c__Alphaproteobacteria; o__Sphingomonadales; f__Sphingomonadaceae; g__Sphingomonas; s__Unclassified_Sphingomonas
otu1822	0.0	49.0	0.0	0.0	0.0	0.0	0.0	0.0	k__Bacteria; p__Synergistetes; c__Synergistia; o__Synergistales; f__Synergistaceae; g__Synergistes; s__Unclassified_Synergistes
otu2132	0.0	0.0	0.0	8.0	41.0	0.0	0.0	0.0	k__Bacteria; p__Firmicutes; c__Clostridia; o__Clostridiales; f__Lachnospiraceae; g__Robinsoniella; s__Robinsoniella_peoriensis
otu3093	5.0	43.0	0.0	0.0	0.0	0.0	1.0	0.0	k__Bacteria; p__Firmicutes; c__Clostridia; o__Clostridiales; f__Unclassified_Clostridiales; g__Unclassified_Clostridiales; s__Unclassified_Clostridiales
otu6890	2.0	0.0	0.0	39.0	0.0	8.0	0.0	0.0	k__Bacteria; p__Bacteroidetes; c__Bacteroidia; o__Bacteroidales; f__Bacteroidaceae; g__Bacteroides; s__Unclassified_Bacteroides
otu330	0.0	0.0	0.0	0.0	0.0	48.0	0.0	0.0	k__Bacteria; p__Firmicutes; c__Clostridia; o__Clostridiales; f__Lachnospiraceae; g__Unclassified_Lachnospiraceae; s__Unclassified_Lachnospiraceae
otu2767	0.0	0.0	2.0	37.0	0.0	4.0	4.0	1.0	k__Bacteria; p__Firmicutes; c__Erysipelotrichi; o__Erysipelotrichales; f__Erysipelotrichaceae; g__[Eubacterium]; s__[Eubacterium]_dolichum
otu4971	27.0	21.0	0.0	0.0	0.0	0.0	0.0	0.0	k__Bacteria; p__Firmicutes; c__Clostridia; o__Clostridiales; f__Ruminococcaceae; g__Unclassified_Ruminococcaceae; s__Unclassified_Ruminococcaceae
otu223	31.0	15.0	0.0	0.0	0.0	1.0	0.0	0.0	k__Bacteria; p__Planctomycetes; c__Phycisphaerae; o__Phycisphaerales; f__Unclassified_Phycisphaerales; g__Unclassified_Phycisphaerales; s__Unclassified_Phycisphaerales
otu421	0.0	0.0	0.0	39.0	0.0	0.0	6.0	2.0	k__Bacteria; p__Firmicutes; c__Clostridia; o__Clostridiales; f__Lachnospiraceae; g__Dorea; s__Unclassified_Dorea
otu3068	9.0	38.0	0.0	0.0	0.0	0.0	0.0	0.0	k__Bacteria; p__Firmicutes; c__Clostridia; o__Clostridiales; f__Lachnospiraceae; g__Blautia; s__Unclassified_Blautia
otu4885	0.0	0.0	1.0	34.0	1.0	11.0	0.0	0.0	k__Bacteria; p__Bacteroidetes; c__Bacteroidia; o__Bacteroidales; f__Bacteroidaceae; g__Bacteroides; s__Unclassified_Bacteroides
otu6001	0.0	0.0	0.0	19.0	0.0	0.0	28.0	0.0	k__Bacteria; p__Firmicutes; c__Clostridia; o__Clostridiales; f__Lachnospiraceae; g__Unclassified_Lachnospiraceae; s__Unclassified_Lachnospiraceae
otu409	0.0	0.0	0.0	22.0	0.0	12.0	12.0	0.0	k__Bacteria; p__Bacteroidetes; c__Bacteroidia; o__Bacteroidales; f__Bacteroidaceae; g__Bacteroides; s__Unclassified_Bacteroides
otu2022	4.0	42.0	0.0	0.0	0.0	0.0	0.0	0.0	k__Bacteria; p__Firmicutes; c__Bacilli; o__Lactobacillales; f__Lactobacillaceae; g__Lactobacillus; s__Unclassified_Lactobacillus
otu2686	6.0	0.0	8.0	8.0	0.0	1.0	8.0	15.0	k__Bacteria; p__Actinobacteria; c__Actinobacteria; o__Actinomycetales; f__Micrococcaceae; g__Rothia; s__Rothia_mucilaginosa
otu5927	0.0	0.0	0.0	36.0	0.0	6.0	4.0	0.0	k__Bacteria; p__Firmicutes; c__Clostridia; o__Clostridiales; f__Lachnospiraceae; g__Unclassified_Lachnospiraceae; s__Unclassified_Lachnospiraceae
otu6308	0.0	46.0	0.0	0.0	0.0	0.0	0.0	0.0	k__Bacteria; p__Firmicutes; c__Bacilli; o__Lactobacillales; f__Lactobacillaceae; g__Lactobacillus; s__Unclassified_Lactobacillus
otu6979	0.0	0.0	0.0	46.0	0.0	0.0	0.0	0.0	k__Bacteria; p__Firmicutes; c__Clostridia; o__Clostridiales; f__Veillonellaceae; g__Megamonas; s__Unclassified_Megamonas
otu836	0.0	0.0	0.0	42.0	0.0	1.0	2.0	0.0	k__Bacteria; p__Firmicutes; c__Clostridia; o__Clostridiales; f__Ruminococcaceae; g__Oscillospira; s__Unclassified_Oscillospira
otu1273	29.0	16.0	0.0	0.0	0.0	0.0	0.0	0.0	k__Bacteria; p__Proteobacteria; c__Alphaproteobacteria; o__Caulobacterales; f__Caulobacteraceae; g__Unclassified_Caulobacteraceae; s__Unclassified_Caulobacteraceae
otu1451	11.0	34.0	0.0	0.0	0.0	0.0	0.0	0.0	k__Bacteria; p__Firmicutes; c__Clostridia; o__Clostridiales; f__Lachnospiraceae; g__Blautia; s__Unclassified_Blautia
otu2791	6.0	15.0	13.0	0.0	0.0	0.0	0.0	11.0	k__Bacteria; p__Proteobacteria; c__Betaproteobacteria; o__Burkholderiales; f__Oxalobacteraceae; g__Ralstonia; s__Unclassified_Ralstonia
otu4265	8.0	37.0	0.0	0.0	0.0	0.0	0.0	0.0	k__Bacteria; p__Firmicutes; c__Bacilli; o__Lactobacillales; f__Lactobacillaceae; g__Lactobacillus; s__Unclassified_Lactobacillus
otu5857	18.0	7.0	2.0	0.0	0.0	18.0	0.0	0.0	k__Bacteria; p__Firmicutes; c__Clostridia; o__Clostridiales; f__Ruminococcaceae; g__Unclassified_Ruminococcaceae; s__Unclassified_Ruminococcaceae
otu5922	0.0	0.0	0.0	31.0	1.0	13.0	0.0	0.0	k__Bacteria; p__Bacteroidetes; c__Bacteroidia; o__Bacteroidales; f__Bacteroidaceae; g__Bacteroides; s__Unclassified_Bacteroides
otu7451	11.0	34.0	0.0	0.0	0.0	0.0	0.0	0.0	k__Bacteria; p__Bacteroidetes; c__Sphingobacteriia; o__Sphingobacteriales; f__Unclassified_Sphingobacteriales; g__Unclassified_Sphingobacteriales; s__Unclassified_Sphingobacteriales
otu965	0.0	44.0	0.0	0.0	0.0	0.0	0.0	0.0	k__Bacteria; p__Firmicutes; c__Clostridia; o__Clostridiales; f__Clostridiaceae; g__Unclassified_Clostridiaceae; s__Unclassified_Clostridiaceae
otu2408	0.0	44.0	0.0	0.0	0.0	0.0	0.0	0.0	k__Bacteria; p__Firmicutes; c__Clostridia; o__Clostridiales; f__Unclassified_Clostridiales; g__Unclassified_Clostridiales; s__Unclassified_Clostridiales
otu3927	0.0	0.0	0.0	2.0	0.0	41.0	1.0	0.0	k__Bacteria; p__Bacteroidetes; c__Bacteroidia; o__Bacteroidales; f__Bacteroidaceae; g__Bacteroides; s__Unclassified_Bacteroides
otu5463	7.0	37.0	0.0	0.0	0.0	0.0	0.0	0.0	k__Bacteria; p__Firmicutes; c__Bacilli; o__Lactobacillales; f__Lactobacillaceae; g__Lactobacillus; s__Unclassified_Lactobacillus
otu5949	0.0	0.0	0.0	0.0	0.0	43.0	1.0	0.0	k__Bacteria; p__Firmicutes; c__Clostridia; o__Clostridiales; f__Lachnospiraceae; g__Coprococcus; s__Unclassified_Coprococcus
otu7205	0.0	0.0	0.0	0.0	41.0	1.0	2.0	0.0	k__Bacteria; p__Firmicutes; c__Erysipelotrichi; o__Erysipelotrichales; f__Erysipelotrichaceae; g__Unclassified_Erysipelotrichaceae; s__Unclassified_Erysipelotrichaceae
otu712	4.0	38.0	0.0	0.0	0.0	1.0	0.0	0.0	k__Bacteria; p__Firmicutes; c__Clostridia; o__Clostridiales; f__Lachnospiraceae; g__Unclassified_Lachnospiraceae; s__Unclassified_Lachnospiraceae
otu928	0.0	0.0	0.0	41.0	0.0	0.0	2.0	0.0	k__Bacteria; p__Firmicutes; c__Clostridia; o__Clostridiales; f__Lachnospiraceae; g__Dorea; s__Unclassified_Dorea
otu2609	0.0	0.0	0.0	15.0	0.0	15.0	13.0	0.0	k__Bacteria; p__Bacteroidetes; c__Bacteroidia; o__Bacteroidales; f__Bacteroidaceae; g__Bacteroides; s__Unclassified_Bacteroides
otu3155	0.0	0.0	0.0	41.0	0.0	2.0	0.0	0.0	k__Bacteria; p__Firmicutes; c__Clostridia; o__Clostridiales; f__Lachnospiraceae; g__Clostridium; s__Clostridium_hathewayi
otu3762	0.0	43.0	0.0	0.0	0.0	0.0	0.0	0.0	k__Bacteria; p__Bacteroidetes; c__Bacteroidia; o__Bacteroidales; f__Bacteroidaceae; g__Bacteroides; s__Unclassified_Bacteroides
otu6631	0.0	0.0	0.0	41.0	0.0	2.0	0.0	0.0	k__Bacteria; p__Bacteroidetes; c__Bacteroidia; o__Bacteroidales; f__Bacteroidaceae; g__Bacteroides; s__Unclassified_Bacteroides
otu7125	0.0	42.0	1.0	0.0	0.0	0.0	0.0	0.0	k__Bacteria; p__Firmicutes; c__Clostridia; o__Clostridiales; f__Unclassified_Clostridiales; g__Unclassified_Clostridiales; s__Unclassified_Clostridiales
otu7243	6.0	4.0	23.0	0.0	0.0	1.0	0.0	9.0	k__Bacteria; p__Proteobacteria; c__Gammaproteobacteria; o__Pseudomonadales; f__Pseudomonadaceae; g__Unclassified_Pseudomonadaceae; s__Unclassified_Pseudomonadaceae
otu1108	0.0	0.0	0.0	42.0	0.0	0.0	0.0	0.0	k__Bacteria; p__Firmicutes; c__Clostridia; o__Clostridiales; f__Veillonellaceae; g__Megamonas; s__Unclassified_Megamonas
otu1325	42.0	0.0	0.0	0.0	0.0	0.0	0.0	0.0	k__Bacteria; p__Proteobacteria; c__Alphaproteobacteria; o__Rhodobacterales; f__Rhodobacteraceae; g__Unclassified_Rhodobacteraceae; s__Unclassified_Rhodobacteraceae
otu3105	0.0	0.0	0.0	0.0	0.0	41.0	1.0	0.0	k__Bacteria; p__Firmicutes; c__Clostridia; o__Clostridiales; f__Ruminococcaceae; g__Ruminococcus; s__Unclassified_Ruminococcus
otu3136	4.0	38.0	0.0	0.0	0.0	0.0	0.0	0.0	k__Bacteria; p__Firmicutes; c__Bacilli; o__Lactobacillales; f__Lactobacillaceae; g__Lactobacillus; s__Unclassified_Lactobacillus
otu3161	0.0	40.0	1.0	0.0	0.0	0.0	0.0	1.0	k__Bacteria; p__Actinobacteria; c__Actinobacteria; o__Bifidobacteriales; f__Bifidobacteriaceae; g__Bifidobacterium; s__Bifidobacterium_animalis
otu4210	9.0	33.0	0.0	0.0	0.0	0.0	0.0	0.0	k__Bacteria; p__Firmicutes; c__Bacilli; o__Lactobacillales; f__Lactobacillaceae; g__Lactobacillus; s__Unclassified_Lactobacillus
otu4481	2.0	40.0	0.0	0.0	0.0	0.0	0.0	0.0	k__Bacteria; p__Firmicutes; c__Bacilli; o__Lactobacillales; f__Lactobacillaceae; g__Lactobacillus; s__Unclassified_Lactobacillus
otu4638	0.0	0.0	0.0	0.0	0.0	32.0	10.0	0.0	k__Bacteria; p__Proteobacteria; c__Gammaproteobacteria; o__Enterobacteriales; f__Enterobacteriaceae; g__Unclassified_Enterobacteriaceae; s__Unclassified_Enterobacteriaceae
otu21	33.0	8.0	0.0	0.0	0.0	0.0	0.0	0.0	k__Bacteria; p__Actinobacteria; c__Actinobacteria; o__Actinomycetales; f__Microbacteriaceae; g__Microbacterium; s__Unclassified_Microbacterium
otu528	5.0	36.0	0.0	0.0	0.0	0.0	0.0	0.0	k__Bacteria; p__Firmicutes; c__Bacilli; o__Lactobacillales; f__Lactobacillaceae; g__Lactobacillus; s__Unclassified_Lactobacillus
otu833	0.0	41.0	0.0	0.0	0.0	0.0	0.0	0.0	k__Bacteria; p__Firmicutes; c__Clostridia; o__Clostridiales; f__Lachnospiraceae; g__[Ruminococcus]; s__Unclassified_[Ruminococcus]
otu907	0.0	40.0	0.0	1.0	0.0	0.0	0.0	0.0	k__Bacteria; p__Firmicutes; c__Clostridia; o__Clostridiales; f__Lachnospiraceae; g__Blautia; s__Unclassified_Blautia
otu1922	5.0	0.0	0.0	0.0	0.0	35.0	1.0	0.0	k__Bacteria; p__Firmicutes; c__Clostridia; o__Clostridiales; f__Lachnospiraceae; g__Unclassified_Lachnospiraceae; s__Unclassified_Lachnospiraceae
otu2599	0.0	0.0	1.0	10.0	4.0	0.0	2.0	24.0	k__Bacteria; p__Firmicutes; c__Erysipelotrichi; o__Erysipelotrichales; f__Erysipelotrichaceae; g__[Eubacterium]; s__[Eubacterium]_dolichum
otu4416	0.0	1.0	0.0	32.0	0.0	0.0	7.0	1.0	k__Bacteria; p__Firmicutes; c__Clostridia; o__Clostridiales; f__Unclassified_Clostridiales; g__Unclassified_Clostridiales; s__Unclassified_Clostridiales
otu4998	29.0	12.0	0.0	0.0	0.0	0.0	0.0	0.0	k__Bacteria; p__Actinobacteria; c__Actinobacteria; o__Actinomycetales; f__Unclassified_Actinomycetales; g__Unclassified_Actinomycetales; s__Unclassified_Actinomycetales
otu5015	6.0	26.0	1.0	0.0	0.0	8.0	0.0	0.0	k__Bacteria; p__Firmicutes; c__Clostridia; o__Clostridiales; f__Ruminococcaceae; g__Oscillospira; s__Unclassified_Oscillospira
otu5137	8.0	2.0	6.0	14.0	0.0	3.0	8.0	0.0	k__Bacteria; p__Bacteroidetes; c__Bacteroidia; o__Bacteroidales; f__Bacteroidaceae; g__Bacteroides; s__Unclassified_Bacteroides
otu5206	0.0	0.0	0.0	4.0	0.0	0.0	0.0	37.0	k__Bacteria; p__Bacteroidetes; c__Bacteroidia; o__Bacteroidales; f__Bacteroidaceae; g__Bacteroides; s__Unclassified_Bacteroides
otu5715	0.0	0.0	0.0	20.0	0.0	12.0	9.0	0.0	k__Bacteria; p__Firmicutes; c__Clostridia; o__Clostridiales; f__Lachnospiraceae; g__Unclassified_Lachnospiraceae; s__Unclassified_Lachnospiraceae
otu713	22.0	12.0	3.0	0.0	0.0	0.0	0.0	3.0	k__Bacteria; p__Proteobacteria; c__Betaproteobacteria; o__Rhodocyclales; f__Rhodocyclaceae; g__Unclassified_Rhodocyclaceae; s__Unclassified_Rhodocyclaceae
otu1789	0.0	0.0	0.0	23.0	0.0	8.0	9.0	0.0	k__Bacteria; p__Bacteroidetes; c__Bacteroidia; o__Bacteroidales; f__Bacteroidaceae; g__Bacteroides; s__Bacteroides_uniformis
otu2171	0.0	0.0	0.0	1.0	0.0	39.0	0.0	0.0	k__Bacteria; p__Bacteroidetes; c__Bacteroidia; o__Bacteroidales; f__Bacteroidaceae; g__Bacteroides; s__Unclassified_Bacteroides
otu3730	28.0	7.0	3.0	0.0	0.0	0.0	0.0	2.0	k__Bacteria; p__Proteobacteria; c__Alphaproteobacteria; o__Rhizobiales; f__Phyllobacteriaceae; g__Phyllobacterium; s__Unclassified_Phyllobacterium
otu3785	0.0	0.0	0.0	33.0	0.0	3.0	4.0	0.0	k__Bacteria; p__Firmicutes; c__Clostridia; o__Clostridiales; f__Lachnospiraceae; g__Unclassified_Lachnospiraceae; s__Unclassified_Lachnospiraceae
otu3899	40.0	0.0	0.0	0.0	0.0	0.0	0.0	0.0	k__Bacteria; p__Bacteroidetes; c__Bacteroidia; o__Bacteroidales; f__Bacteroidaceae; g__Bacteroides; s__Bacteroides_barnesiae
otu4991	7.0	0.0	0.0	0.0	0.0	11.0	0.0	22.0	k__Bacteria; p__Bacteroidetes; c__Bacteroidia; o__Bacteroidales; f__Bacteroidaceae; g__Bacteroides; s__Unclassified_Bacteroides
otu5233	0.0	0.0	0.0	25.0	0.0	14.0	1.0	0.0	k__Bacteria; p__Bacteroidetes; c__Bacteroidia; o__Bacteroidales; f__Bacteroidaceae; g__Bacteroides; s__Unclassified_Bacteroides
otu6708	0.0	0.0	0.0	4.0	0.0	1.0	35.0	0.0	k__Bacteria; p__Firmicutes; c__Clostridia; o__Clostridiales; f__Lachnospiraceae; g__Blautia; s__Blautia_producta
otu7179	4.0	0.0	0.0	1.0	0.0	18.0	0.0	17.0	k__Bacteria; p__Bacteroidetes; c__Bacteroidia; o__Bacteroidales; f__Bacteroidaceae; g__Bacteroides; s__Unclassified_Bacteroides
otu7545	13.0	27.0	0.0	0.0	0.0	0.0	0.0	0.0	k__Bacteria; p__Firmicutes; c__Bacilli; o__Lactobacillales; f__Lactobacillaceae; g__Lactobacillus; s__Unclassified_Lactobacillus
otu795	6.0	33.0	0.0	0.0	0.0	0.0	0.0	0.0	k__Bacteria; p__Bacteroidetes; c__Bacteroidia; o__Bacteroidales; f__Prevotellaceae; g__Prevotella; s__Unclassified_Prevotella
otu1250	0.0	0.0	0.0	3.0	0.0	5.0	31.0	0.0	k__Bacteria; p__Firmicutes; c__Clostridia; o__Clostridiales; f__Lachnospiraceae; g__Unclassified_Lachnospiraceae; s__Unclassified_Lachnospiraceae
otu1593	10.0	0.0	0.0	0.0	0.0	29.0	0.0	0.0	k__Bacteria; p__Firmicutes; c__Clostridia; o__Clostridiales; f__Ruminococcaceae; g__Unclassified_Ruminococcaceae; s__Unclassified_Ruminococcaceae
otu2074	0.0	0.0	0.0	27.0	0.0	1.0	11.0	0.0	k__Bacteria; p__Firmicutes; c__Clostridia; o__Clostridiales; f__Ruminococcaceae; g__Unclassified_Ruminococcaceae; s__Unclassified_Ruminococcaceae
otu2641	3.0	36.0	0.0	0.0	0.0	0.0	0.0	0.0	k__Bacteria; p__Firmicutes; c__Clostridia; o__Clostridiales; f__Unclassified_Clostridiales; g__Unclassified_Clostridiales; s__Unclassified_Clostridiales
otu3167	6.0	33.0	0.0	0.0	0.0	0.0	0.0	0.0	k__Bacteria; p__Firmicutes; c__Bacilli; o__Lactobacillales; f__Lactobacillaceae; g__Lactobacillus; s__Unclassified_Lactobacillus
otu4088	0.0	0.0	0.0	39.0	0.0	0.0	0.0	0.0	k__Bacteria; p__Firmicutes; c__Clostridia; o__Clostridiales; f__Lachnospiraceae; g__Unclassified_Lachnospiraceae; s__Unclassified_Lachnospiraceae
otu5431	10.0	29.0	0.0	0.0	0.0	0.0	0.0	0.0	k__Bacteria; p__Firmicutes; c__Bacilli; o__Lactobacillales; f__Lactobacillaceae; g__Lactobacillus; s__Unclassified_Lactobacillus
otu5560	0.0	3.0	0.0	31.0	0.0	5.0	0.0	0.0	k__Bacteria; p__Bacteroidetes; c__Bacteroidia; o__Bacteroidales; f__Bacteroidaceae; g__Bacteroides; s__Unclassified_Bacteroides
otu5816	1.0	38.0	0.0	0.0	0.0	0.0	0.0	0.0	k__Bacteria; p__Firmicutes; c__Bacilli; o__Lactobacillales; f__Enterococcaceae; g__Enterococcus; s__Unclassified_Enterococcus
otu6242	19.0	17.0	0.0	0.0	0.0	1.0	1.0	1.0	k__Bacteria; p__Proteobacteria; c__Gammaproteobacteria; o__Pseudomonadales; f__Pseudomonadaceae; g__Pseudomonas; s__Unclassified_Pseudomonas
otu6402	7.0	32.0	0.0	0.0	0.0	0.0	0.0	0.0	k__Bacteria; p__Firmicutes; c__Bacilli; o__Lactobacillales; f__Lactobacillaceae; g__Lactobacillus; s__Unclassified_Lactobacillus
otu7083	7.0	1.0	0.0	30.0	0.0	1.0	0.0	0.0	k__Bacteria; p__Firmicutes; c__Clostridia; o__Clostridiales; f__Lachnospiraceae; g__Blautia; s__Unclassified_Blautia
otu7109	0.0	39.0	0.0	0.0	0.0	0.0	0.0	0.0	k__Bacteria; p__Firmicutes; c__Bacilli; o__Lactobacillales; f__Lactobacillaceae; g__Lactobacillus; s__Unclassified_Lactobacillus
otu974	2.0	36.0	0.0	0.0	0.0	0.0	0.0	0.0	k__Bacteria; p__Firmicutes; c__Clostridia; o__Clostridiales; f__Lachnospiraceae; g__Blautia; s__Unclassified_Blautia
otu2111	0.0	0.0	0.0	31.0	0.0	1.0	3.0	3.0	k__Bacteria; p__Firmicutes; c__Clostridia; o__Clostridiales; f__Lachnospiraceae; g__Unclassified_Lachnospiraceae; s__Unclassified_Lachnospiraceae
otu2468	0.0	7.0	2.0	3.0	0.0	26.0	0.0	0.0	k__Bacteria; p__Firmicutes; c__Clostridia; o__Clostridiales; f__Ruminococcaceae; g__Oscillospira; s__Unclassified_Oscillospira
otu5228	1.0	34.0	3.0	0.0	0.0	0.0	0.0	0.0	k__Bacteria; p__Bacteroidetes; c__Bacteroidia; o__Bacteroidales; f__S24-7; g__Unclassified_S24-7; s__Unclassified_S24-7
otu6541	1.0	7.0	0.0	3.0	0.0	24.0	2.0	1.0	k__Bacteria; p__Firmicutes; c__Clostridia; o__Clostridiales; f__Lachnospiraceae; g__Unclassified_Lachnospiraceae; s__Unclassified_Lachnospiraceae
otu6616	0.0	0.0	0.0	38.0	0.0	0.0	0.0	0.0	k__Bacteria; p__Firmicutes; c__Clostridia; o__Clostridiales; f__Lachnospiraceae; g__Unclassified_Lachnospiraceae; s__Unclassified_Lachnospiraceae
otu7667	0.0	0.0	0.0	28.0	0.0	0.0	0.0	10.0	k__Bacteria; p__Firmicutes; c__Clostridia; o__Clostridiales; f__Lachnospiraceae; g__Unclassified_Lachnospiraceae; s__Unclassified_Lachnospiraceae
otu2695	0.0	0.0	0.0	0.0	37.0	0.0	0.0	0.0	k__Bacteria; p__Proteobacteria; c__Gammaproteobacteria; o__Enterobacteriales; f__Enterobacteriaceae; g__Unclassified_Enterobacteriaceae; s__Unclassified_Enterobacteriaceae
otu3171	0.0	0.0	0.0	0.0	0.0	37.0	0.0	0.0	k__Bacteria; p__Bacteroidetes; c__Bacteroidia; o__Bacteroidales; f__Bacteroidaceae; g__Bacteroides; s__Unclassified_Bacteroides
otu4681	10.0	27.0	0.0	0.0	0.0	0.0	0.0	0.0	k__Bacteria; p__Actinobacteria; c__Coriobacteriia; o__Coriobacteriales; f__Coriobacteriaceae; g__Adlercreutzia; s__Unclassified_Adlercreutzia
otu4698	0.0	0.0	0.0	0.0	0.0	0.0	0.0	37.0	k__Bacteria; p__Bacteroidetes; c__Bacteroidia; o__Bacteroidales; f__Bacteroidaceae; g__Bacteroides; s__Bacteroides_fragilis
otu6146	0.0	0.0	0.0	0.0	0.0	37.0	0.0	0.0	k__Bacteria; p__Firmicutes; c__Clostridia; o__Clostridiales; f__Ruminococcaceae; g__Unclassified_Ruminococcaceae; s__Unclassified_Ruminococcaceae
otu6404	0.0	2.0	0.0	0.0	0.0	35.0	0.0	0.0	k__Bacteria; p__Bacteroidetes; c__Bacteroidia; o__Bacteroidales; f__Bacteroidaceae; g__Bacteroides; s__Bacteroides_ovatus
otu603	5.0	31.0	0.0	0.0	0.0	0.0	0.0	0.0	k__Bacteria; p__Bacteroidetes; c__Bacteroidia; o__Bacteroidales; f__Rikenellaceae; g__Unclassified_Rikenellaceae; s__Unclassified_Rikenellaceae
otu623	0.0	3.0	0.0	0.0	0.0	33.0	0.0	0.0	k__Bacteria; p__Firmicutes; c__Clostridia; o__Clostridiales; f__Unclassified_Clostridiales; g__Unclassified_Clostridiales; s__Unclassified_Clostridiales
otu1400	0.0	0.0	0.0	0.0	0.0	36.0	0.0	0.0	k__Bacteria; p__Firmicutes; c__Clostridia; o__Clostridiales; f__Ruminococcaceae; g__Oscillospira; s__Unclassified_Oscillospira
otu2108	0.0	0.0	0.0	0.0	0.0	36.0	0.0	0.0	k__Bacteria; p__Proteobacteria; c__Gammaproteobacteria; o__Pseudomonadales; f__Moraxellaceae; g__Enhydrobacter; s__Unclassified_Enhydrobacter
otu2986	0.0	8.0	0.0	2.0	0.0	16.0	10.0	0.0	k__Bacteria; p__[Thermi]; c__Deinococci; o__Thermales; f__Thermaceae; g__Thermus; s__Unclassified_Thermus
otu3756	24.0	12.0	0.0	0.0	0.0	0.0	0.0	0.0	k__Bacteria; p__Proteobacteria; c__Gammaproteobacteria; o__Xanthomonadales; f__Sinobacteraceae; g__Unclassified_Sinobacteraceae; s__Unclassified_Sinobacteraceae
otu4029	0.0	36.0	0.0	0.0	0.0	0.0	0.0	0.0	k__Bacteria; p__Firmicutes; c__Clostridia; o__Clostridiales; f__Unclassified_Clostridiales; g__Unclassified_Clostridiales; s__Unclassified_Clostridiales
otu4299	17.0	19.0	0.0	0.0	0.0	0.0	0.0	0.0	k__Bacteria; p__Proteobacteria; c__Alphaproteobacteria; o__Rhizobiales; f__Hyphomicrobiaceae; g__Rhodoplanes; s__Unclassified_Rhodoplanes
otu4902	0.0	36.0	0.0	0.0	0.0	0.0	0.0	0.0	k__Bacteria; p__Actinobacteria; c__Coriobacteriia; o__Coriobacteriales; f__Coriobacteriaceae; g__Adlercreutzia; s__Unclassified_Adlercreutzia
otu6218	0.0	0.0	1.0	22.0	5.0	0.0	1.0	7.0	k__Bacteria; p__Firmicutes; c__Erysipelotrichi; o__Erysipelotrichales; f__Erysipelotrichaceae; g__[Eubacterium]; s__[Eubacterium]_dolichum
otu6754	5.0	31.0	0.0	0.0	0.0	0.0	0.0	0.0	k__Bacteria; p__Firmicutes; c__Clostridia; o__Clostridiales; f__Ruminococcaceae; g__Unclassified_Ruminococcaceae; s__Unclassified_Ruminococcaceae
otu7316	0.0	0.0	0.0	1.0	0.0	3.0	32.0	0.0	k__Bacteria; p__Firmicutes; c__Clostridia; o__Clostridiales; f__Lachnospiraceae; g__[Ruminococcus]; s__[Ruminococcus]_gnavus
otu7543	0.0	3.0	0.0	0.0	0.0	32.0	1.0	0.0	k__Bacteria; p__Firmicutes; c__Clostridia; o__Clostridiales; f__Lachnospiraceae; g__Coprococcus; s__Unclassified_Coprococcus
otu489	0.0	0.0	0.0	23.0	0.0	0.0	12.0	0.0	k__Bacteria; p__Firmicutes; c__Clostridia; o__Clostridiales; f__Lachnospiraceae; g__Unclassified_Lachnospiraceae; s__Unclassified_Lachnospiraceae
otu613	1.0	34.0	0.0	0.0	0.0	0.0	0.0	0.0	k__Bacteria; p__Bacteroidetes; c__Bacteroidia; o__Bacteroidales; f__S24-7; g__Unclassified_S24-7; s__Unclassified_S24-7
otu1202	0.0	0.0	0.0	0.0	0.0	35.0	0.0	0.0	k__Bacteria; p__Proteobacteria; c__Gammaproteobacteria; o__Pseudomonadales; f__Moraxellaceae; g__Enhydrobacter; s__Unclassified_Enhydrobacter
otu2170	0.0	35.0	0.0	0.0	0.0	0.0	0.0	0.0	k__Bacteria; p__Firmicutes; c__Erysipelotrichi; o__Erysipelotrichales; f__Erysipelotrichaceae; g__Unclassified_Erysipelotrichaceae; s__Unclassified_Erysipelotrichaceae
otu3158	0.0	0.0	0.0	33.0	0.0	2.0	0.0	0.0	k__Bacteria; p__Firmicutes; c__Clostridia; o__Clostridiales; f__Lachnospiraceae; g__[Ruminococcus]; s__[Ruminococcus]_gnavus
otu3682	0.0	1.0	0.0	0.0	0.0	0.0	34.0	0.0	k__Bacteria; p__Firmicutes; c__Bacilli; o__Lactobacillales; f__Enterococcaceae; g__Enterococcus; s__Unclassified_Enterococcus
otu3736	0.0	0.0	1.0	23.0	0.0	0.0	4.0	7.0	k__Bacteria; p__Actinobacteria; c__Actinobacteria; o__Actinomycetales; f__Actinomycetaceae; g__Actinomyces; s__Unclassified_Actinomyces
otu3916	5.0	1.0	2.0	12.0	0.0	5.0	10.0	0.0	k__Bacteria; p__Bacteroidetes; c__Bacteroidia; o__Bacteroidales; f__Bacteroidaceae; g__Bacteroides; s__Unclassified_Bacteroides
otu5077	0.0	0.0	0.0	35.0	0.0	0.0	0.0	0.0	k__Bacteria; p__Firmicutes; c__Clostridia; o__Clostridiales; f__Lachnospiraceae; g__Unclassified_Lachnospiraceae; s__Unclassified_Lachnospiraceae
otu5476	0.0	0.0	0.0	2.0	0.0	4.0	0.0	29.0	k__Bacteria; p__Bacteroidetes; c__Bacteroidia; o__Bacteroidales; f__Bacteroidaceae; g__Bacteroides; s__Unclassified_Bacteroides
otu5847	0.0	35.0	0.0	0.0	0.0	0.0	0.0	0.0	k__Bacteria; p__Bacteroidetes; c__Bacteroidia; o__Bacteroidales; f__S24-7; g__Unclassified_S24-7; s__Unclassified_S24-7
otu6838	0.0	0.0	0.0	1.0	1.0	1.0	32.0	0.0	k__Bacteria; p__Firmicutes; c__Clostridia; o__Clostridiales; f__Lachnospiraceae; g__Unclassified_Lachnospiraceae; s__Unclassified_Lachnospiraceae
otu7650	0.0	0.0	0.0	33.0	0.0	1.0	1.0	0.0	k__Bacteria; p__Firmicutes; c__Clostridia; o__Clostridiales; f__Lachnospiraceae; g__Unclassified_Lachnospiraceae; s__Unclassified_Lachnospiraceae
otu567	0.0	0.0	5.0	0.0	0.0	0.0	2.0	27.0	k__Bacteria; p__Firmicutes; c__Bacilli; o__Lactobacillales; f__Enterococcaceae; g__Enterococcus; s__Unclassified_Enterococcus
otu1579	0.0	0.0	0.0	34.0	0.0	0.0	0.0	0.0	k__Bacteria; p__Bacteroidetes; c__Bacteroidia; o__Bacteroidales; f__Bacteroidaceae; g__Bacteroides; s__Unclassified_Bacteroides
otu1918	0.0	0.0	0.0	0.0	34.0	0.0	0.0	0.0	k__Bacteria; p__Firmicutes; c__Clostridia; o__Clostridiales; f__Ruminococcaceae; g__Faecalibacterium; s__Faecalibacterium_prausnitzii
otu3505	0.0	0.0	0.0	0.0	0.0	1.0	33.0	0.0	k__Bacteria; p__Firmicutes; c__Bacilli; o__Lactobacillales; f__Enterococcaceae; g__Enterococcus; s__Unclassified_Enterococcus
otu4223	0.0	0.0	0.0	0.0	0.0	34.0	0.0	0.0	k__Bacteria; p__Bacteroidetes; c__Bacteroidia; o__Bacteroidales; f__Bacteroidaceae; g__Bacteroides; s__Unclassified_Bacteroides
otu4306	10.0	24.0	0.0	0.0	0.0	0.0	0.0	0.0	k__Bacteria; p__Firmicutes; c__Clostridia; o__Clostridiales; f__Clostridiaceae; g__Unclassified_Clostridiaceae; s__Unclassified_Clostridiaceae
otu5168	11.0	23.0	0.0	0.0	0.0	0.0	0.0	0.0	k__Bacteria; p__Firmicutes; c__Bacilli; o__Lactobacillales; f__Lactobacillaceae; g__Lactobacillus; s__Unclassified_Lactobacillus
otu5218	0.0	0.0	0.0	22.0	0.0	0.0	9.0	3.0	k__Bacteria; p__Firmicutes; c__Clostridia; o__Clostridiales; f__Lachnospiraceae; g__[Ruminococcus]; s__[Ruminococcus]_gnavus
otu6118	0.0	34.0	0.0	0.0	0.0	0.0	0.0	0.0	k__Bacteria; p__Bacteroidetes; c__Bacteroidia; o__Bacteroidales; f__S24-7; g__Unclassified_S24-7; s__Unclassified_S24-7
otu6712	4.0	29.0	0.0	0.0	0.0	0.0	0.0	1.0	k__Bacteria; p__Firmicutes; c__Clostridia; o__Clostridiales; f__Ruminococcaceae; g__Unclassified_Ruminococcaceae; s__Unclassified_Ruminococcaceae
otu7622	0.0	30.0	1.0	0.0	0.0	0.0	3.0	0.0	k__Bacteria; p__Firmicutes; c__Bacilli; o__Lactobacillales; f__Streptococcaceae; g__Streptococcus; s__Unclassified_Streptococcus
otu1369	0.0	0.0	0.0	1.0	0.0	6.0	26.0	0.0	k__Bacteria; p__Bacteroidetes; c__Bacteroidia; o__Bacteroidales; f__Bacteroidaceae; g__Bacteroides; s__Unclassified_Bacteroides
otu1703	0.0	0.0	31.0	0.0	0.0	0.0	0.0	2.0	k__Bacteria; p__Actinobacteria; c__Actinobacteria; o__Actinomycetales; f__Micrococcaceae; g__Rothia; s__Rothia_mucilaginosa
otu4180	0.0	0.0	0.0	33.0	0.0	0.0	0.0	0.0	k__Bacteria; p__Bacteroidetes; c__Bacteroidia; o__Bacteroidales; f__Rikenellaceae; g__Unclassified_Rikenellaceae; s__Unclassified_Rikenellaceae
otu5270	0.0	0.0	0.0	0.0	33.0	0.0	0.0	0.0	k__Bacteria; p__Proteobacteria; c__Gammaproteobacteria; o__Enterobacteriales; f__Enterobacteriaceae; g__Klebsiella; s__Unclassified_Klebsiella
otu10	0.0	0.0	0.0	0.0	32.0	0.0	0.0	0.0	k__Bacteria; p__Proteobacteria; c__Gammaproteobacteria; o__Enterobacteriales; f__Enterobacteriaceae; g__Unclassified_Enterobacteriaceae; s__Unclassified_Enterobacteriaceae
otu1919	0.0	0.0	0.0	0.0	32.0	0.0	0.0	0.0	k__Bacteria; p__Proteobacteria; c__Gammaproteobacteria; o__Enterobacteriales; f__Enterobacteriaceae; g__Unclassified_Enterobacteriaceae; s__Unclassified_Enterobacteriaceae
otu3735	0.0	0.0	0.0	32.0	0.0	0.0	0.0	0.0	k__Bacteria; p__Firmicutes; c__Clostridia; o__Clostridiales; f__Ruminococcaceae; g__Oscillospira; s__Unclassified_Oscillospira
otu3894	12.0	0.0	0.0	0.0	0.0	20.0	0.0	0.0	k__Bacteria; p__Firmicutes; c__Clostridia; o__Clostridiales; f__Lachnospiraceae; g__Unclassified_Lachnospiraceae; s__Unclassified_Lachnospiraceae
otu5128	0.0	0.0	0.0	32.0	0.0	0.0	0.0	0.0	k__Bacteria; p__Firmicutes; c__Clostridia; o__Clostridiales; f__Lachnospiraceae; g__[Ruminococcus]; s__[Ruminococcus]_gnavus
otu5230	0.0	0.0	0.0	32.0	0.0	0.0	0.0	0.0	k__Bacteria; p__Firmicutes; c__Clostridia; o__Clostridiales; f__Lachnospiraceae; g__Unclassified_Lachnospiraceae; s__Unclassified_Lachnospiraceae
otu6637	6.0	26.0	0.0	0.0	0.0	0.0	0.0	0.0	k__Bacteria; p__Firmicutes; c__Clostridia; o__Clostridiales; f__Ruminococcaceae; g__Unclassified_Ruminococcaceae; s__Unclassified_Ruminococcaceae
otu2062	0.0	0.0	0.0	0.0	0.0	0.0	31.0	0.0	k__Bacteria; p__Proteobacteria; c__Gammaproteobacteria; o__Enterobacteriales; f__Enterobacteriaceae; g__Unclassified_Enterobacteriaceae; s__Unclassified_Enterobacteriaceae
otu3080	9.0	6.0	0.0	0.0	0.0	2.0	14.0	0.0	k__Bacteria; p__Proteobacteria; c__Gammaproteobacteria; o__Enterobacteriales; f__Enterobacteriaceae; g__Unclassified_Enterobacteriaceae; s__Unclassified_Enterobacteriaceae
otu3840	0.0	0.0	5.0	0.0	0.0	0.0	0.0	26.0	k__Bacteria; p__Proteobacteria; c__Betaproteobacteria; o__Burkholderiales; f__Oxalobacteraceae; g__Herbaspirillum; s__Unclassified_Herbaspirillum
otu3976	9.0	0.0	1.0	9.0	0.0	3.0	9.0	0.0	k__Bacteria; p__Bacteroidetes; c__Bacteroidia; o__Bacteroidales; f__Bacteroidaceae; g__Bacteroides; s__Unclassified_Bacteroides
otu3977	0.0	0.0	0.0	0.0	0.0	3.0	28.0	0.0	k__Bacteria; p__Proteobacteria; c__Gammaproteobacteria; o__Enterobacteriales; f__Enterobacteriaceae; g__Unclassified_Enterobacteriaceae; s__Unclassified_Enterobacteriaceae
otu5260	0.0	1.0	0.0	0.0	0.0	0.0	0.0	30.0	k__Bacteria; p__Bacteroidetes; c__Bacteroidia; o__Bacteroidales; f__Bacteroidaceae; g__Bacteroides; s__Bacteroides_fragilis
otu5446	6.0	25.0	0.0	0.0	0.0	0.0	0.0	0.0	k__Bacteria; p__Firmicutes; c__Bacilli; o__Lactobacillales; f__Lactobacillaceae; g__Lactobacillus; s__Unclassified_Lactobacillus
otu5986	0.0	0.0	0.0	0.0	31.0	0.0	0.0	0.0	k__Bacteria; p__Proteobacteria; c__Gammaproteobacteria; o__Enterobacteriales; f__Enterobacteriaceae; g__Unclassified_Enterobacteriaceae; s__Unclassified_Enterobacteriaceae
otu6669	0.0	0.0	0.0	5.0	0.0	16.0	3.0	7.0	k__Bacteria; p__Firmicutes; c__Clostridia; o__Clostridiales; f__Lachnospiraceae; g__Unclassified_Lachnospiraceae; s__Unclassified_Lachnospiraceae
otu7156	0.0	30.0	0.0	0.0	1.0	0.0	0.0	0.0	k__Bacteria; p__Actinobacteria; c__Coriobacteriia; o__Coriobacteriales; f__Coriobacteriaceae; g__Unclassified_Coriobacteriaceae; s__Unclassified_Coriobacteriaceae
otu580	0.0	0.0	0.0	30.0	0.0	0.0	0.0	0.0	k__Bacteria; p__Bacteroidetes; c__Bacteroidia; o__Bacteroidales; f__Bacteroidaceae; g__Bacteroides; s__Unclassified_Bacteroides
otu1228	11.0	11.0	0.0	0.0	0.0	8.0	0.0	0.0	k__Bacteria; p__Firmicutes; c__Clostridia; o__Clostridiales; f__Lachnospiraceae; g__Unclassified_Lachnospiraceae; s__Unclassified_Lachnospiraceae
otu1268	1.0	0.0	0.0	22.0	2.0	1.0	4.0	0.0	k__Bacteria; p__Firmicutes; c__Clostridia; o__Clostridiales; f__Ruminococcaceae; g__Unclassified_Ruminococcaceae; s__Unclassified_Ruminococcaceae
otu1430	6.0	24.0	0.0	0.0	0.0	0.0	0.0	0.0	k__Bacteria; p__Firmicutes; c__Clostridia; o__Clostridiales; f__Unclassified_Clostridiales; g__Unclassified_Clostridiales; s__Unclassified_Clostridiales
otu1859	0.0	30.0	0.0	0.0	0.0	0.0	0.0	0.0	k__Bacteria; p__Firmicutes; c__Bacilli; o__Lactobacillales; f__Lactobacillaceae; g__Lactobacillus; s__Unclassified_Lactobacillus
otu1884	4.0	5.0	0.0	15.0	0.0	6.0	0.0	0.0	k__Bacteria; p__Firmicutes; c__Clostridia; o__Clostridiales; f__Ruminococcaceae; g__Unclassified_Ruminococcaceae; s__Unclassified_Ruminococcaceae
otu4219	0.0	30.0	0.0	0.0	0.0	0.0	0.0	0.0	k__Bacteria; p__Firmicutes; c__Erysipelotrichi; o__Erysipelotrichales; f__Erysipelotrichaceae; g__Allobaculum; s__Unclassified_Allobaculum
otu4643	0.0	0.0	0.0	28.0	1.0	1.0	0.0	0.0	k__Bacteria; p__Bacteroidetes; c__Bacteroidia; o__Bacteroidales; f__Bacteroidaceae; g__Bacteroides; s__Unclassified_Bacteroides
otu5094	4.0	26.0	0.0	0.0	0.0	0.0	0.0	0.0	k__Bacteria; p__Firmicutes; c__Bacilli; o__Lactobacillales; f__Lactobacillaceae; g__Lactobacillus; s__Unclassified_Lactobacillus
otu5190	0.0	0.0	0.0	0.0	30.0	0.0	0.0	0.0	k__Bacteria; p__Firmicutes; c__Clostridia; o__Clostridiales; f__Lachnospiraceae; g__Robinsoniella; s__Robinsoniella_peoriensis
otu5283	0.0	0.0	0.0	1.0	29.0	0.0	0.0	0.0	k__Bacteria; p__Bacteroidetes; c__Bacteroidia; o__Bacteroidales; f__Bacteroidaceae; g__Bacteroides; s__Unclassified_Bacteroides
otu5855	0.0	0.0	0.0	17.0	0.0	0.0	8.0	5.0	k__Bacteria; p__Firmicutes; c__Clostridia; o__Clostridiales; f__Ruminococcaceae; g__Unclassified_Ruminococcaceae; s__Unclassified_Ruminococcaceae
otu6813	0.0	30.0	0.0	0.0	0.0	0.0	0.0	0.0	k__Bacteria; p__Bacteroidetes; c__Bacteroidia; o__Bacteroidales; f__S24-7; g__Unclassified_S24-7; s__Unclassified_S24-7
otu6834	0.0	0.0	0.0	0.0	0.0	0.0	30.0	0.0	k__Bacteria; p__Firmicutes; c__Clostridia; o__Clostridiales; f__Veillonellaceae; g__Veillonella; s__Veillonella_dispar
otu186	0.0	0.0	0.0	29.0	0.0	0.0	0.0	0.0	k__Bacteria; p__Bacteroidetes; c__Bacteroidia; o__Bacteroidales; f__Bacteroidaceae; g__Bacteroides; s__Unclassified_Bacteroides
otu2366	22.0	7.0	0.0	0.0	0.0	0.0	0.0	0.0	k__Bacteria; p__Firmicutes; c__Bacilli; o__Lactobacillales; f__Lactobacillaceae; g__Lactobacillus; s__Unclassified_Lactobacillus
otu3769	0.0	0.0	0.0	14.0	15.0	0.0	0.0	0.0	k__Bacteria; p__Bacteroidetes; c__Bacteroidia; o__Bacteroidales; f__Bacteroidaceae; g__Bacteroides; s__Bacteroides_ovatus
otu3808	1.0	12.0	0.0	0.0	0.0	0.0	16.0	0.0	k__Bacteria; p__Actinobacteria; c__Actinobacteria; o__Bifidobacteriales; f__Bifidobacteriaceae; g__Bifidobacterium; s__Unclassified_Bifidobacterium
otu4101	9.0	17.0	0.0	0.0	0.0	3.0	0.0	0.0	k__Bacteria; p__Proteobacteria; c__Betaproteobacteria; o__Burkholderiales; f__Comamonadaceae; g__Unclassified_Comamonadaceae; s__Unclassified_Comamonadaceae
otu4350	0.0	0.0	0.0	0.0	0.0	29.0	0.0	0.0	k__Bacteria; p__Firmicutes; c__Clostridia; o__Clostridiales; f__Ruminococcaceae; g__Unclassified_Ruminococcaceae; s__Unclassified_Ruminococcaceae
otu4816	0.0	5.0	0.0	24.0	0.0	0.0	0.0	0.0	k__Bacteria; p__Firmicutes; c__Clostridia; o__Clostridiales; f__Lachnospiraceae; g__Unclassified_Lachnospiraceae; s__Unclassified_Lachnospiraceae
otu5852	0.0	1.0	0.0	3.0	0.0	0.0	7.0	18.0	k__Bacteria; p__Firmicutes; c__Clostridia; o__Clostridiales; f__Unclassified_Clostridiales; g__Unclassified_Clostridiales; s__Unclassified_Clostridiales
otu6002	0.0	0.0	0.0	29.0	0.0	0.0	0.0	0.0	k__Bacteria; p__Firmicutes; c__Clostridia; o__Clostridiales; f__Lachnospiraceae; g__Unclassified_Lachnospiraceae; s__Unclassified_Lachnospiraceae
otu6532	0.0	0.0	0.0	29.0	0.0	0.0	0.0	0.0	k__Bacteria; p__Firmicutes; c__Clostridia; o__Clostridiales; f__Lachnospiraceae; g__Unclassified_Lachnospiraceae; s__Unclassified_Lachnospiraceae
otu6770	0.0	1.0	0.0	27.0	0.0	0.0	1.0	0.0	k__Bacteria; p__Bacteroidetes; c__Bacteroidia; o__Bacteroidales; f__Bacteroidaceae; g__Bacteroides; s__Unclassified_Bacteroides
otu6942	0.0	0.0	29.0	0.0	0.0	0.0	0.0	0.0	k__Bacteria; p__Proteobacteria; c__Betaproteobacteria; o__Burkholderiales; f__Unclassified_Burkholderiales; g__Unclassified_Burkholderiales; s__Unclassified_Burkholderiales
otu118	3.0	0.0	0.0	0.0	0.0	25.0	0.0	0.0	k__Bacteria; p__Firmicutes; c__Clostridia; o__Clostridiales; f__Unclassified_Clostridiales; g__Unclassified_Clostridiales; s__Unclassified_Clostridiales
otu465	0.0	28.0	0.0	0.0	0.0	0.0	0.0	0.0	k__Bacteria; p__Firmicutes; c__Clostridia; o__Clostridiales; f__Unclassified_Clostridiales; g__Unclassified_Clostridiales; s__Unclassified_Clostridiales
otu672	10.0	0.0	0.0	0.0	0.0	18.0	0.0	0.0	k__Bacteria; p__Firmicutes; c__Clostridia; o__Clostridiales; f__Ruminococcaceae; g__Unclassified_Ruminococcaceae; s__Unclassified_Ruminococcaceae
otu1428	17.0	11.0	0.0	0.0	0.0	0.0	0.0	0.0	k__Bacteria; p__Bacteroidetes; c__Bacteroidia; o__Bacteroidales; f__S24-7; g__Unclassified_S24-7; s__Unclassified_S24-7
otu1494	0.0	0.0	0.0	4.0	4.0	2.0	18.0	0.0	k__Bacteria; p__Firmicutes; c__Clostridia; o__Clostridiales; f__Lachnospiraceae; g__Unclassified_Lachnospiraceae; s__Unclassified_Lachnospiraceae
otu2527	0.0	0.0	0.0	28.0	0.0	0.0	0.0	0.0	k__Bacteria; p__Firmicutes; c__Clostridia; o__Clostridiales; f__Veillonellaceae; g__Megamonas; s__Unclassified_Megamonas
otu3660	1.0	0.0	0.0	3.0	0.0	0.0	0.0	24.0	k__Bacteria; p__Bacteroidetes; c__Bacteroidia; o__Bacteroidales; f__Bacteroidaceae; g__Bacteroides; s__Unclassified_Bacteroides
otu3691	3.0	25.0	0.0	0.0	0.0	0.0	0.0	0.0	k__Bacteria; p__Firmicutes; c__Bacilli; o__Turicibacterales; f__Turicibacteraceae; g__Turicibacter; s__Unclassified_Turicibacter
otu3750	0.0	0.0	0.0	23.0	2.0	3.0	0.0	0.0	k__Bacteria; p__Bacteroidetes; c__Bacteroidia; o__Bacteroidales; f__Bacteroidaceae; g__Bacteroides; s__Unclassified_Bacteroides
otu4716	0.0	0.0	0.0	0.0	0.0	28.0	0.0	0.0	k__Bacteria; p__Firmicutes; c__Clostridia; o__Clostridiales; f__Unclassified_Clostridiales; g__Unclassified_Clostridiales; s__Unclassified_Clostridiales
otu5095	13.0	15.0	0.0	0.0	0.0	0.0	0.0	0.0	k__Bacteria; p__Firmicutes; c__Clostridia; o__Clostridiales; f__Unclassified_Clostridiales; g__Unclassified_Clostridiales; s__Unclassified_Clostridiales
otu5591	4.0	24.0	0.0	0.0	0.0	0.0	0.0	0.0	k__Bacteria; p__Firmicutes; c__Clostridia; o__Clostridiales; f__Lachnospiraceae; g__Blautia; s__Blautia_producta
otu5628	0.0	0.0	0.0	7.0	0.0	9.0	12.0	0.0	k__Bacteria; p__Firmicutes; c__Clostridia; o__Clostridiales; f__Lachnospiraceae; g__Unclassified_Lachnospiraceae; s__Unclassified_Lachnospiraceae
otu6115	0.0	28.0	0.0	0.0	0.0	0.0	0.0	0.0	k__Bacteria; p__Firmicutes; c__Bacilli; o__Lactobacillales; f__Lactobacillaceae; g__Lactobacillus; s__Unclassified_Lactobacillus
otu7386	0.0	0.0	0.0	6.0	1.0	12.0	9.0	0.0	k__Bacteria; p__Firmicutes; c__Clostridia; o__Clostridiales; f__Lachnospiraceae; g__Unclassified_Lachnospiraceae; s__Unclassified_Lachnospiraceae
otu7548	0.0	0.0	0.0	0.0	0.0	0.0	0.0	28.0	k__Bacteria; p__Bacteroidetes; c__Bacteroidia; o__Bacteroidales; f__Bacteroidaceae; g__Bacteroides; s__Bacteroides_fragilis
otu499	19.0	8.0	0.0	0.0	0.0	0.0	0.0	0.0	k__Bacteria; p__Actinobacteria; c__Actinobacteria; o__Bifidobacteriales; f__Bifidobacteriaceae; g__Bifidobacterium; s__Bifidobacterium_adolescentis
otu1235	0.0	0.0	0.0	0.0	0.0	7.0	0.0	20.0	k__Bacteria; p__Firmicutes; c__Clostridia; o__Clostridiales; f__Ruminococcaceae; g__Unclassified_Ruminococcaceae; s__Unclassified_Ruminococcaceae
otu1696	0.0	19.0	0.0	0.0	0.0	8.0	0.0	0.0	k__Bacteria; p__Firmicutes; c__Clostridia; o__Clostridiales; f__Ruminococcaceae; g__Unclassified_Ruminococcaceae; s__Unclassified_Ruminococcaceae
otu2248	1.0	0.0	0.0	0.0	0.0	0.0	0.0	26.0	k__Bacteria; p__Bacteroidetes; c__Bacteroidia; o__Bacteroidales; f__Bacteroidaceae; g__Bacteroides; s__Bacteroides_fragilis
otu2515	9.0	17.0	1.0	0.0	0.0	0.0	0.0	0.0	k__Bacteria; p__Bacteroidetes; c__Bacteroidia; o__Bacteroidales; f__S24-7; g__Unclassified_S24-7; s__Unclassified_S24-7
otu2608	5.0	22.0	0.0	0.0	0.0	0.0	0.0	0.0	k__Bacteria; p__Firmicutes; c__Erysipelotrichi; o__Erysipelotrichales; f__Erysipelotrichaceae; g__Allobaculum; s__Unclassified_Allobaculum
otu2733	0.0	0.0	0.0	16.0	0.0	1.0	10.0	0.0	k__Bacteria; p__Firmicutes; c__Clostridia; o__Clostridiales; f__Lachnospiraceae; g__Unclassified_Lachnospiraceae; s__Unclassified_Lachnospiraceae
otu2809	9.0	18.0	0.0	0.0	0.0	0.0	0.0	0.0	k__Bacteria; p__Firmicutes; c__Bacilli; o__Lactobacillales; f__Lactobacillaceae; g__Lactobacillus; s__Unclassified_Lactobacillus
otu3204	0.0	0.0	0.0	16.0	0.0	4.0	7.0	0.0	k__Bacteria; p__Bacteroidetes; c__Bacteroidia; o__Bacteroidales; f__Bacteroidaceae; g__Bacteroides; s__Unclassified_Bacteroides
otu3413	0.0	22.0	0.0	0.0	0.0	5.0	0.0	0.0	k__Bacteria; p__Firmicutes; c__Clostridia; o__Clostridiales; f__Lachnospiraceae; g__Unclassified_Lachnospiraceae; s__Unclassified_Lachnospiraceae
otu4525	0.0	0.0	0.0	27.0	0.0	0.0	0.0	0.0	k__Bacteria; p__Firmicutes; c__Clostridia; o__Clostridiales; f__Lachnospiraceae; g__[Ruminococcus]; s__[Ruminococcus]_gnavus
otu4678	0.0	0.0	0.0	1.0	25.0	0.0	1.0	0.0	k__Bacteria; p__Firmicutes; c__Erysipelotrichi; o__Erysipelotrichales; f__Erysipelotrichaceae; g__Unclassified_Erysipelotrichaceae; s__Unclassified_Erysipelotrichaceae
otu4947	0.0	0.0	0.0	0.0	5.0	1.0	21.0	0.0	k__Bacteria; p__Firmicutes; c__Clostridia; o__Clostridiales; f__Lachnospiraceae; g__Unclassified_Lachnospiraceae; s__Unclassified_Lachnospiraceae
otu6335	8.0	13.0	0.0	0.0	0.0	5.0	1.0	0.0	k__Bacteria; p__Proteobacteria; c__Alphaproteobacteria; o__Rhizobiales; f__Bradyrhizobiaceae; g__Bradyrhizobium; s__Unclassified_Bradyrhizobium
otu6784	3.0	24.0	0.0	0.0	0.0	0.0	0.0	0.0	k__Bacteria; p__Bacteroidetes; c__Bacteroidia; o__Bacteroidales; f__S24-7; g__Unclassified_S24-7; s__Unclassified_S24-7
otu7136	0.0	0.0	0.0	0.0	0.0	2.0	25.0	0.0	k__Bacteria; p__Proteobacteria; c__Gammaproteobacteria; o__Enterobacteriales; f__Enterobacteriaceae; g__Unclassified_Enterobacteriaceae; s__Unclassified_Enterobacteriaceae
otu427	0.0	0.0	0.0	0.0	0.0	13.0	0.0	13.0	k__Bacteria; p__Firmicutes; c__Clostridia; o__Clostridiales; f__Ruminococcaceae; g__Unclassified_Ruminococcaceae; s__Unclassified_Ruminococcaceae
otu581	0.0	0.0	0.0	0.0	0.0	26.0	0.0	0.0	k__Bacteria; p__Firmicutes; c__Clostridia; o__Clostridiales; f__Ruminococcaceae; g__Oscillospira; s__Unclassified_Oscillospira
otu1351	0.0	0.0	0.0	5.0	0.0	0.0	12.0	9.0	k__Bacteria; p__Firmicutes; c__Clostridia; o__Clostridiales; f__Unclassified_Clostridiales; g__Unclassified_Clostridiales; s__Unclassified_Clostridiales
otu2125	15.0	11.0	0.0	0.0	0.0	0.0	0.0	0.0	k__Bacteria; p__Bacteroidetes; c__Bacteroidia; o__Bacteroidales; f__[Odoribacteraceae]; g__Butyricimonas; s__Unclassified_Butyricimonas
otu2387	0.0	0.0	0.0	0.0	0.0	26.0	0.0	0.0	k__Bacteria; p__Firmicutes; c__Clostridia; o__Clostridiales; f__[Tissierellaceae]; g__WAL_1855D; s__Unclassified_WAL_1855D
otu2774	0.0	0.0	0.0	25.0	0.0	1.0	0.0	0.0	k__Bacteria; p__Firmicutes; c__Clostridia; o__Clostridiales; f__Ruminococcaceae; g__Unclassified_Ruminococcaceae; s__Unclassified_Ruminococcaceae
otu3250	0.0	15.0	0.0	1.0	0.0	0.0	3.0	7.0	k__Bacteria; p__Actinobacteria; c__Actinobacteria; o__Actinomycetales; f__Corynebacteriaceae; g__Corynebacterium; s__Corynebacterium_durum
otu3375	0.0	26.0	0.0	0.0	0.0	0.0	0.0	0.0	k__Bacteria; p__Bacteroidetes; c__Bacteroidia; o__Bacteroidales; f__S24-7; g__Unclassified_S24-7; s__Unclassified_S24-7
otu4273	0.0	0.0	0.0	1.0	3.0	0.0	21.0	1.0	k__Bacteria; p__Firmicutes; c__Clostridia; o__Clostridiales; f__Lachnospiraceae; g__Unclassified_Lachnospiraceae; s__Unclassified_Lachnospiraceae
otu4999	0.0	25.0	0.0	0.0	0.0	1.0	0.0	0.0	k__Bacteria; p__Firmicutes; c__Clostridia; o__Clostridiales; f__Lachnospiraceae; g__Unclassified_Lachnospiraceae; s__Unclassified_Lachnospiraceae
otu5173	0.0	0.0	0.0	11.0	0.0	4.0	11.0	0.0	k__Bacteria; p__Firmicutes; c__Clostridia; o__Clostridiales; f__Lachnospiraceae; g__Unclassified_Lachnospiraceae; s__Unclassified_Lachnospiraceae
otu5782	5.0	21.0	0.0	0.0	0.0	0.0	0.0	0.0	k__Bacteria; p__Firmicutes; c__Clostridia; o__Clostridiales; f__Ruminococcaceae; g__Unclassified_Ruminococcaceae; s__Unclassified_Ruminococcaceae
otu6951	0.0	0.0	0.0	0.0	0.0	0.0	26.0	0.0	k__Bacteria; p__Firmicutes; c__Clostridia; o__Clostridiales; f__Veillonellaceae; g__Veillonella; s__Veillonella_dispar
otu7219	0.0	0.0	0.0	21.0	0.0	0.0	5.0	0.0	k__Bacteria; p__Firmicutes; c__Clostridia; o__Clostridiales; f__Unclassified_Clostridiales; g__Unclassified_Clostridiales; s__Unclassified_Clostridiales
otu7239	0.0	0.0	0.0	26.0	0.0	0.0	0.0	0.0	k__Bacteria; p__Firmicutes; c__Clostridia; o__Clostridiales; f__Lachnospiraceae; g__Unclassified_Lachnospiraceae; s__Unclassified_Lachnospiraceae
otu171	0.0	0.0	0.0	1.0	16.0	0.0	0.0	8.0	k__Bacteria; p__Firmicutes; c__Clostridia; o__Clostridiales; f__Ruminococcaceae; g__Unclassified_Ruminococcaceae; s__Unclassified_Ruminococcaceae
otu894	17.0	8.0	0.0	0.0	0.0	0.0	0.0	0.0	k__Bacteria; p__Firmicutes; c__Clostridia; o__Clostridiales; f__Ruminococcaceae; g__Unclassified_Ruminococcaceae; s__Unclassified_Ruminococcaceae
otu1078	6.0	19.0	0.0	0.0	0.0	0.0	0.0	0.0	k__Bacteria; p__Firmicutes; c__Bacilli; o__Lactobacillales; f__Lactobacillaceae; g__Lactobacillus; s__Unclassified_Lactobacillus
otu1691	0.0	0.0	0.0	0.0	25.0	0.0	0.0	0.0	k__Bacteria; p__Proteobacteria; c__Gammaproteobacteria; o__Enterobacteriales; f__Enterobacteriaceae; g__Klebsiella; s__Unclassified_Klebsiella
otu1893	0.0	0.0	0.0	23.0	0.0	0.0	0.0	2.0	k__Bacteria; p__Firmicutes; c__Erysipelotrichi; o__Erysipelotrichales; f__Erysipelotrichaceae; g__[Eubacterium]; s__[Eubacterium]_dolichum
otu1906	0.0	0.0	0.0	3.0	19.0	2.0	1.0	0.0	k__Bacteria; p__Actinobacteria; c__Coriobacteriia; o__Coriobacteriales; f__Coriobacteriaceae; g__Eggerthella; s__Eggerthella_lenta
otu4178	17.0	6.0	1.0	0.0	0.0	1.0	0.0	0.0	k__Bacteria; p__Proteobacteria; c__Alphaproteobacteria; o__Sphingomonadales; f__Sphingomonadaceae; g__Sphingobium; s__Unclassified_Sphingobium
otu4565	9.0	7.0	0.0	0.0	0.0	9.0	0.0	0.0	k__Bacteria; p__Firmicutes; c__Clostridia; o__Clostridiales; f__Ruminococcaceae; g__Unclassified_Ruminococcaceae; s__Unclassified_Ruminococcaceae
otu4669	0.0	0.0	0.0	21.0	0.0	1.0	2.0	1.0	k__Bacteria; p__Firmicutes; c__Clostridia; o__Clostridiales; f__Lachnospiraceae; g__[Ruminococcus]; s__[Ruminococcus]_gnavus
otu6437	0.0	0.0	0.0	11.0	0.0	0.0	14.0	0.0	k__Bacteria; p__Bacteroidetes; c__Bacteroidia; o__Bacteroidales; f__Bacteroidaceae; g__Bacteroides; s__Unclassified_Bacteroides
otu6506	0.0	0.0	0.0	23.0	0.0	2.0	0.0	0.0	k__Bacteria; p__Firmicutes; c__Clostridia; o__Clostridiales; f__Unclassified_Clostridiales; g__Unclassified_Clostridiales; s__Unclassified_Clostridiales
otu6531	0.0	2.0	0.0	23.0	0.0	0.0	0.0	0.0	k__Bacteria; p__Firmicutes; c__Clostridia; o__Clostridiales; f__Lachnospiraceae; g__Unclassified_Lachnospiraceae; s__Unclassified_Lachnospiraceae
otu7011	25.0	0.0	0.0	0.0	0.0	0.0	0.0	0.0	k__Bacteria; p__Actinobacteria; c__Acidimicrobiia; o__Acidimicrobiales; f__OCS155; g__Unclassified_OCS155; s__Unclassified_OCS155
otu196	3.0	0.0	0.0	0.0	0.0	13.0	0.0	8.0	k__Bacteria; p__Bacteroidetes; c__Bacteroidia; o__Bacteroidales; f__Bacteroidaceae; g__Bacteroides; s__Unclassified_Bacteroides
otu280	14.0	10.0	0.0	0.0	0.0	0.0	0.0	0.0	k__Bacteria; p__Firmicutes; c__Clostridia; o__Clostridiales; f__Lachnospiraceae; g__Coprococcus; s__Unclassified_Coprococcus
otu310	4.0	20.0	0.0	0.0	0.0	0.0	0.0	0.0	k__Bacteria; p__Firmicutes; c__Clostridia; o__Clostridiales; f__Unclassified_Clostridiales; g__Unclassified_Clostridiales; s__Unclassified_Clostridiales
otu453	0.0	0.0	0.0	20.0	0.0	3.0	1.0	0.0	k__Bacteria; p__Bacteroidetes; c__Bacteroidia; o__Bacteroidales; f__Bacteroidaceae; g__Bacteroides; s__Unclassified_Bacteroides
otu485	6.0	18.0	0.0	0.0	0.0	0.0	0.0	0.0	k__Bacteria; p__Firmicutes; c__Clostridia; o__Clostridiales; f__Lachnospiraceae; g__Unclassified_Lachnospiraceae; s__Unclassified_Lachnospiraceae
otu564	20.0	4.0	0.0	0.0	0.0	0.0	0.0	0.0	k__Bacteria; p__Proteobacteria; c__Betaproteobacteria; o__Burkholderiales; f__Burkholderiaceae; g__Burkholderia; s__Unclassified_Burkholderia
otu1602	1.0	4.0	19.0	0.0	0.0	0.0	0.0	0.0	k__Bacteria; p__Firmicutes; c__Clostridia; o__Clostridiales; f__Unclassified_Clostridiales; g__Unclassified_Clostridiales; s__Unclassified_Clostridiales
otu2175	0.0	0.0	0.0	0.0	0.0	0.0	8.0	16.0	k__Bacteria; p__Firmicutes; c__Clostridia; o__Clostridiales; f__Ruminococcaceae; g__Faecalibacterium; s__Faecalibacterium_prausnitzii
otu2494	0.0	0.0	0.0	0.0	0.0	24.0	0.0	0.0	k__Bacteria; p__Bacteroidetes; c__Bacteroidia; o__Bacteroidales; f__Bacteroidaceae; g__Bacteroides; s__Bacteroides_uniformis
otu2537	0.0	0.0	24.0	0.0	0.0	0.0	0.0	0.0	k__Bacteria; p__Actinobacteria; c__Actinobacteria; o__Bifidobacteriales; f__Bifidobacteriaceae; g__Bifidobacterium; s__Bifidobacterium_longum
otu2545	0.0	0.0	0.0	24.0	0.0	0.0	0.0	0.0	k__Bacteria; p__Firmicutes; c__Clostridia; o__Clostridiales; f__Lachnospiraceae; g__Unclassified_Lachnospiraceae; s__Unclassified_Lachnospiraceae
otu2549	0.0	24.0	0.0	0.0	0.0	0.0	0.0	0.0	k__Bacteria; p__Firmicutes; c__Clostridia; o__Clostridiales; f__Unclassified_Clostridiales; g__Unclassified_Clostridiales; s__Unclassified_Clostridiales
otu2808	0.0	24.0	0.0	0.0	0.0	0.0	0.0	0.0	k__Bacteria; p__Firmicutes; c__Clostridia; o__Clostridiales; f__Unclassified_Clostridiales; g__Unclassified_Clostridiales; s__Unclassified_Clostridiales
otu2839	0.0	0.0	0.0	0.0	0.0	0.0	24.0	0.0	k__Bacteria; p__Bacteroidetes; c__Bacteroidia; o__Bacteroidales; f__Bacteroidaceae; g__Bacteroides; s__Unclassified_Bacteroides
otu2881	0.0	0.0	0.0	0.0	24.0	0.0	0.0	0.0	k__Bacteria; p__Proteobacteria; c__Gammaproteobacteria; o__Enterobacteriales; f__Enterobacteriaceae; g__Klebsiella; s__Unclassified_Klebsiella
otu2900	0.0	0.0	0.0	0.0	0.0	0.0	24.0	0.0	k__Bacteria; p__Actinobacteria; c__Actinobacteria; o__Actinomycetales; f__Actinomycetaceae; g__Actinomyces; s__Unclassified_Actinomyces
otu3301	0.0	24.0	0.0	0.0	0.0	0.0	0.0	0.0	k__Bacteria; p__Firmicutes; c__Clostridia; o__Clostridiales; f__Ruminococcaceae; g__Ruminococcus; s__Unclassified_Ruminococcus
otu3311	0.0	0.0	0.0	24.0	0.0	0.0	0.0	0.0	k__Bacteria; p__Firmicutes; c__Clostridia; o__Clostridiales; f__Lachnospiraceae; g__Dorea; s__Unclassified_Dorea
otu3863	0.0	0.0	0.0	0.0	0.0	1.0	0.0	23.0	k__Bacteria; p__Bacteroidetes; c__Bacteroidia; o__Bacteroidales; f__Bacteroidaceae; g__Bacteroides; s__Unclassified_Bacteroides
otu4636	0.0	0.0	0.0	2.0	0.0	14.0	0.0	8.0	k__Bacteria; p__Bacteroidetes; c__Bacteroidia; o__Bacteroidales; f__Bacteroidaceae; g__Bacteroides; s__Unclassified_Bacteroides
otu5056	24.0	0.0	0.0	0.0	0.0	0.0	0.0	0.0	k__Bacteria; p__Firmicutes; c__Clostridia; o__Clostridiales; f__Ruminococcaceae; g__Faecalibacterium; s__Faecalibacterium_prausnitzii
otu5700	0.0	0.0	0.0	0.0	0.0	7.0	17.0	0.0	k__Bacteria; p__Proteobacteria; c__Gammaproteobacteria; o__Enterobacteriales; f__Enterobacteriaceae; g__Unclassified_Enterobacteriaceae; s__Unclassified_Enterobacteriaceae
otu5792	0.0	0.0	0.0	5.0	0.0	2.0	17.0	0.0	k__Bacteria; p__Bacteroidetes; c__Bacteroidia; o__Bacteroidales; f__Bacteroidaceae; g__Bacteroides; s__Unclassified_Bacteroides
otu5853	0.0	24.0	0.0	0.0	0.0	0.0	0.0	0.0	k__Bacteria; p__Firmicutes; c__Clostridia; o__Clostridiales; f__Ruminococcaceae; g__Unclassified_Ruminococcaceae; s__Unclassified_Ruminococcaceae
otu5871	0.0	0.0	0.0	22.0	0.0	0.0	0.0	2.0	k__Bacteria; p__Firmicutes; c__Clostridia; o__Clostridiales; f__Lachnospiraceae; g__[Ruminococcus]; s__[Ruminococcus]_gnavus
otu5902	0.0	24.0	0.0	0.0	0.0	0.0	0.0	0.0	k__Bacteria; p__Actinobacteria; c__Coriobacteriia; o__Coriobacteriales; f__Coriobacteriaceae; g__Unclassified_Coriobacteriaceae; s__Unclassified_Coriobacteriaceae
otu6131	0.0	22.0	0.0	0.0	0.0	2.0	0.0	0.0	k__Bacteria; p__Firmicutes; c__Clostridia; o__Clostridiales; f__Ruminococcaceae; g__Oscillospira; s__Unclassified_Oscillospira
otu6538	0.0	0.0	0.0	0.0	24.0	0.0	0.0	0.0	k__Bacteria; p__Proteobacteria; c__Gammaproteobacteria; o__Enterobacteriales; f__Enterobacteriaceae; g__Unclassified_Enterobacteriaceae; s__Unclassified_Enterobacteriaceae
otu6651	0.0	0.0	0.0	0.0	0.0	0.0	24.0	0.0	k__Bacteria; p__Firmicutes; c__Clostridia; o__Clostridiales; f__Veillonellaceae; g__Veillonella; s__Veillonella_dispar
otu6713	0.0	13.0	0.0	0.0	0.0	11.0	0.0	0.0	k__Bacteria; p__Firmicutes; c__Clostridia; o__Clostridiales; f__Lachnospiraceae; g__Coprococcus; s__Unclassified_Coprococcus
otu7288	15.0	9.0	0.0	0.0	0.0	0.0	0.0	0.0	k__Bacteria; p__Firmicutes; c__Bacilli; o__Lactobacillales; f__Lactobacillaceae; g__Lactobacillus; s__Unclassified_Lactobacillus
otu7725	0.0	0.0	0.0	13.0	0.0	11.0	0.0	0.0	k__Bacteria; p__Firmicutes; c__Clostridia; o__Clostridiales; f__Lachnospiraceae; g__Blautia; s__Unclassified_Blautia
otu73	0.0	16.0	4.0	0.0	0.0	3.0	0.0	0.0	k__Bacteria; p__Proteobacteria; c__Alphaproteobacteria; o__Caulobacterales; f__Caulobacteraceae; g__Mycoplana; s__Unclassified_Mycoplana
otu115	0.0	0.0	0.0	5.0	17.0	0.0	1.0	0.0	k__Bacteria; p__Firmicutes; c__Clostridia; o__Clostridiales; f__Unclassified_Clostridiales; g__Unclassified_Clostridiales; s__Unclassified_Clostridiales
otu133	0.0	0.0	0.0	0.0	23.0	0.0	0.0	0.0	k__Bacteria; p__Firmicutes; c__Erysipelotrichi; o__Erysipelotrichales; f__Erysipelotrichaceae; g__Unclassified_Erysipelotrichaceae; s__Unclassified_Erysipelotrichaceae
otu946	8.0	15.0	0.0	0.0	0.0	0.0	0.0	0.0	k__Bacteria; p__Firmicutes; c__Clostridia; o__Clostridiales; f__Ruminococcaceae; g__Unclassified_Ruminococcaceae; s__Unclassified_Ruminococcaceae
otu1314	4.0	0.0	0.0	2.0	0.0	10.0	0.0	7.0	k__Bacteria; p__Bacteroidetes; c__Bacteroidia; o__Bacteroidales; f__Bacteroidaceae; g__Bacteroides; s__Unclassified_Bacteroides
otu1554	0.0	20.0	0.0	3.0	0.0	0.0	0.0	0.0	k__Bacteria; p__Firmicutes; c__Clostridia; o__Clostridiales; f__Lachnospiraceae; g__Blautia; s__Unclassified_Blautia
otu1654	0.0	0.0	0.0	20.0	0.0	3.0	0.0	0.0	k__Bacteria; p__Bacteroidetes; c__Bacteroidia; o__Bacteroidales; f__Bacteroidaceae; g__Bacteroides; s__Unclassified_Bacteroides
otu1792	0.0	0.0	0.0	0.0	0.0	0.0	23.0	0.0	k__Bacteria; p__Firmicutes; c__Clostridia; o__Clostridiales; f__Ruminococcaceae; g__Unclassified_Ruminococcaceae; s__Unclassified_Ruminococcaceae
otu2306	4.0	0.0	0.0	0.0	0.0	19.0	0.0	0.0	k__Bacteria; p__Firmicutes; c__Clostridia; o__Clostridiales; f__Lachnospiraceae; g__Unclassified_Lachnospiraceae; s__Unclassified_Lachnospiraceae
otu2427	0.0	23.0	0.0	0.0	0.0	0.0	0.0	0.0	k__Bacteria; p__Firmicutes; c__Clostridia; o__Clostridiales; f__Unclassified_Clostridiales; g__Unclassified_Clostridiales; s__Unclassified_Clostridiales
otu2591	0.0	0.0	0.0	21.0	0.0	0.0	2.0	0.0	k__Bacteria; p__Firmicutes; c__Clostridia; o__Clostridiales; f__Lachnospiraceae; g__Unclassified_Lachnospiraceae; s__Unclassified_Lachnospiraceae
otu2866	0.0	23.0	0.0	0.0	0.0	0.0	0.0	0.0	k__Bacteria; p__Firmicutes; c__Clostridia; o__Clostridiales; f__Ruminococcaceae; g__Unclassified_Ruminococcaceae; s__Unclassified_Ruminococcaceae
otu3473	9.0	14.0	0.0	0.0	0.0	0.0	0.0	0.0	k__Bacteria; p__Firmicutes; c__Clostridia; o__Clostridiales; f__Unclassified_Clostridiales; g__Unclassified_Clostridiales; s__Unclassified_Clostridiales
otu3574	0.0	13.0	6.0	0.0	0.0	0.0	0.0	4.0	k__Bacteria; p__Proteobacteria; c__Alphaproteobacteria; o__Sphingomonadales; f__Sphingomonadaceae; g__Unclassified_Sphingomonadaceae; s__Unclassified_Sphingomonadaceae
otu3829	6.0	0.0	0.0	4.0	1.0	5.0	7.0	0.0	k__Bacteria; p__Firmicutes; c__Clostridia; o__Clostridiales; f__Lachnospiraceae; g__Blautia; s__Blautia_producta
otu4009	0.0	0.0	0.0	23.0	0.0	0.0	0.0	0.0	k__Bacteria; p__Firmicutes; c__Clostridia; o__Clostridiales; f__Veillonellaceae; g__Megamonas; s__Unclassified_Megamonas
otu4232	0.0	0.0	0.0	0.0	22.0	1.0	0.0	0.0	k__Bacteria; p__Bacteroidetes; c__Bacteroidia; o__Bacteroidales; f__Bacteroidaceae; g__Bacteroides; s__Bacteroides_ovatus
otu4243	0.0	0.0	0.0	23.0	0.0	0.0	0.0	0.0	k__Bacteria; p__Firmicutes; c__Clostridia; o__Clostridiales; f__Lachnospiraceae; g__Unclassified_Lachnospiraceae; s__Unclassified_Lachnospiraceae
otu4290	0.0	0.0	0.0	23.0	0.0	0.0	0.0	0.0	k__Bacteria; p__Firmicutes; c__Clostridia; o__Clostridiales; f__Lachnospiraceae; g__[Ruminococcus]; s__[Ruminococcus]_gnavus
otu4980	0.0	22.0	0.0	0.0	0.0	1.0	0.0	0.0	k__Bacteria; p__Firmicutes; c__Bacilli; o__Lactobacillales; f__Streptococcaceae; g__Streptococcus; s__Unclassified_Streptococcus
otu5178	6.0	16.0	0.0	0.0	0.0	1.0	0.0	0.0	k__Bacteria; p__Proteobacteria; c__Gammaproteobacteria; o__Xanthomonadales; f__Xanthomonadaceae; g__Unclassified_Xanthomonadaceae; s__Unclassified_Xanthomonadaceae
otu5312	0.0	1.0	0.0	2.0	0.0	9.0	11.0	0.0	k__Bacteria; p__TM7; c__TM7-3; o__Unclassified_TM7-3; f__Unclassified_TM7-3; g__Unclassified_TM7-3; s__Unclassified_TM7-3
otu5581	0.0	0.0	0.0	0.0	23.0	0.0	0.0	0.0	k__Bacteria; p__Proteobacteria; c__Gammaproteobacteria; o__Enterobacteriales; f__Enterobacteriaceae; g__Unclassified_Enterobacteriaceae; s__Unclassified_Enterobacteriaceae
otu6084	0.0	0.0	1.0	19.0	0.0	2.0	1.0	0.0	k__Bacteria; p__Firmicutes; c__Clostridia; o__Clostridiales; f__Lachnospiraceae; g__Unclassified_Lachnospiraceae; s__Unclassified_Lachnospiraceae
otu6230	3.0	20.0	0.0	0.0	0.0	0.0	0.0	0.0	k__Bacteria; p__Firmicutes; c__Bacilli; o__Lactobacillales; f__Lactobacillaceae; g__Lactobacillus; s__Unclassified_Lactobacillus
otu6322	3.0	0.0	0.0	3.0	0.0	5.0	12.0	0.0	k__Bacteria; p__Firmicutes; c__Bacilli; o__Lactobacillales; f__Streptococcaceae; g__Streptococcus; s__Unclassified_Streptococcus
otu6352	0.0	0.0	0.0	0.0	0.0	23.0	0.0	0.0	k__Bacteria; p__Firmicutes; c__Clostridia; o__Clostridiales; f__Unclassified_Clostridiales; g__Unclassified_Clostridiales; s__Unclassified_Clostridiales
otu7201	0.0	0.0	0.0	0.0	0.0	0.0	1.0	22.0	k__Bacteria; p__Firmicutes; c__Bacilli; o__Lactobacillales; f__Enterococcaceae; g__Enterococcus; s__Unclassified_Enterococcus
otu734	0.0	22.0	0.0	0.0	0.0	0.0	0.0	0.0	k__Bacteria; p__Actinobacteria; c__Actinobacteria; o__Actinomycetales; f__Micrococcaceae; g__Rothia; s__Rothia_nasimurium
otu1086	0.0	0.0	0.0	0.0	22.0	0.0	0.0	0.0	k__Bacteria; p__Firmicutes; c__Clostridia; o__Clostridiales; f__Ruminococcaceae; g__Faecalibacterium; s__Faecalibacterium_prausnitzii
otu3465	0.0	0.0	0.0	0.0	0.0	6.0	0.0	16.0	k__Bacteria; p__Firmicutes; c__Clostridia; o__Clostridiales; f__Ruminococcaceae; g__Unclassified_Ruminococcaceae; s__Unclassified_Ruminococcaceae
otu3725	0.0	0.0	0.0	0.0	0.0	0.0	7.0	15.0	k__Bacteria; p__Firmicutes; c__Clostridia; o__Clostridiales; f__Ruminococcaceae; g__Faecalibacterium; s__Faecalibacterium_prausnitzii
otu4130	0.0	0.0	0.0	5.0	0.0	8.0	5.0	4.0	k__Bacteria; p__Bacteroidetes; c__Bacteroidia; o__Bacteroidales; f__Bacteroidaceae; g__Bacteroides; s__Unclassified_Bacteroides
otu4307	0.0	0.0	0.0	15.0	1.0	2.0	4.0	0.0	k__Bacteria; p__Firmicutes; c__Clostridia; o__Clostridiales; f__Lachnospiraceae; g__Unclassified_Lachnospiraceae; s__Unclassified_Lachnospiraceae
otu4645	0.0	14.0	0.0	0.0	0.0	8.0	0.0	0.0	k__Bacteria; p__Firmicutes; c__Clostridia; o__Clostridiales; f__Lachnospiraceae; g__Blautia; s__Unclassified_Blautia
otu4756	0.0	22.0	0.0	0.0	0.0	0.0	0.0	0.0	k__Bacteria; p__Firmicutes; c__Clostridia; o__Clostridiales; f__Peptostreptococcaceae; g__Peptostreptococcus; s__Unclassified_Peptostreptococcus
otu5014	7.0	15.0	0.0	0.0	0.0	0.0	0.0	0.0	k__Bacteria; p__Firmicutes; c__Clostridia; o__Clostridiales; f__Ruminococcaceae; g__Ruminococcus; s__Unclassified_Ruminococcus
otu5197	0.0	3.0	0.0	0.0	0.0	19.0	0.0	0.0	k__Bacteria; p__Firmicutes; c__Clostridia; o__Clostridiales; f__Clostridiaceae; g__Unclassified_Clostridiaceae; s__Unclassified_Clostridiaceae
otu5275	0.0	22.0	0.0	0.0	0.0	0.0	0.0	0.0	k__Bacteria; p__Firmicutes; c__Clostridia; o__Clostridiales; f__Unclassified_Clostridiales; g__Unclassified_Clostridiales; s__Unclassified_Clostridiales
otu6068	2.0	0.0	0.0	0.0	0.0	7.0	0.0	13.0	k__Bacteria; p__Bacteroidetes; c__Bacteroidia; o__Bacteroidales; f__Bacteroidaceae; g__Bacteroides; s__Unclassified_Bacteroides
otu6220	4.0	18.0	0.0	0.0	0.0	0.0	0.0	0.0	k__Bacteria; p__Firmicutes; c__Clostridia; o__Clostridiales; f__Unclassified_Clostridiales; g__Unclassified_Clostridiales; s__Unclassified_Clostridiales
otu6317	0.0	0.0	0.0	0.0	0.0	22.0	0.0	0.0	k__Bacteria; p__Firmicutes; c__Clostridia; o__Clostridiales; f__Ruminococcaceae; g__Unclassified_Ruminococcaceae; s__Unclassified_Ruminococcaceae
otu6357	0.0	22.0	0.0	0.0	0.0	0.0	0.0	0.0	k__Bacteria; p__Firmicutes; c__Bacilli; o__Lactobacillales; f__Lactobacillaceae; g__Lactobacillus; s__Unclassified_Lactobacillus
otu6411	0.0	0.0	20.0	0.0	2.0	0.0	0.0	0.0	k__Bacteria; p__Proteobacteria; c__Gammaproteobacteria; o__Pasteurellales; f__Pasteurellaceae; g__Haemophilus; s__Haemophilus_parainfluenzae
otu7139	18.0	4.0	0.0	0.0	0.0	0.0	0.0	0.0	k__Bacteria; p__Firmicutes; c__Erysipelotrichi; o__Erysipelotrichales; f__Erysipelotrichaceae; g__Allobaculum; s__Unclassified_Allobaculum
otu7422	0.0	0.0	0.0	0.0	0.0	0.0	2.0	20.0	k__Bacteria; p__Firmicutes; c__Bacilli; o__Lactobacillales; f__Unclassified_Lactobacillales; g__Unclassified_Lactobacillales; s__Unclassified_Lactobacillales
otu7746	22.0	0.0	0.0	0.0	0.0	0.0	0.0	0.0	k__Bacteria; p__Proteobacteria; c__Gammaproteobacteria; o__Enterobacteriales; f__Enterobacteriaceae; g__Serratia; s__Unclassified_Serratia
otu91	18.0	0.0	3.0	0.0	0.0	0.0	0.0	0.0	k__Bacteria; p__Firmicutes; c__Bacilli; o__Lactobacillales; f__Streptococcaceae; g__Lactococcus; s__Unclassified_Lactococcus
otu271	0.0	21.0	0.0	0.0	0.0	0.0	0.0	0.0	k__Bacteria; p__Firmicutes; c__Bacilli; o__Lactobacillales; f__Lactobacillaceae; g__Lactobacillus; s__Unclassified_Lactobacillus
otu910	0.0	6.0	0.0	14.0	0.0	1.0	0.0	0.0	k__Bacteria; p__Firmicutes; c__Clostridia; o__Clostridiales; f__Lachnospiraceae; g__Dorea; s__Unclassified_Dorea
otu1227	4.0	17.0	0.0	0.0	0.0	0.0	0.0	0.0	k__Bacteria; p__Bacteroidetes; c__Bacteroidia; o__Bacteroidales; f__S24-7; g__Unclassified_S24-7; s__Unclassified_S24-7
otu1666	0.0	21.0	0.0	0.0	0.0	0.0	0.0	0.0	k__Bacteria; p__Bacteroidetes; c__Bacteroidia; o__Bacteroidales; f__S24-7; g__Unclassified_S24-7; s__Unclassified_S24-7
otu2368	0.0	0.0	0.0	0.0	2.0	0.0	8.0	11.0	k__Bacteria; p__Firmicutes; c__Bacilli; o__Lactobacillales; f__Unclassified_Lactobacillales; g__Unclassified_Lactobacillales; s__Unclassified_Lactobacillales
otu2955	0.0	21.0	0.0	0.0	0.0	0.0	0.0	0.0	k__Bacteria; p__Firmicutes; c__Bacilli; o__Lactobacillales; f__Lactobacillaceae; g__Lactobacillus; s__Unclassified_Lactobacillus
otu3598	13.0	0.0	0.0	0.0	0.0	8.0	0.0	0.0	k__Bacteria; p__Firmicutes; c__Clostridia; o__Clostridiales; f__Unclassified_Clostridiales; g__Unclassified_Clostridiales; s__Unclassified_Clostridiales
otu4035	0.0	0.0	0.0	20.0	0.0	0.0	1.0	0.0	k__Bacteria; p__Firmicutes; c__Clostridia; o__Clostridiales; f__Lachnospiraceae; g__[Ruminococcus]; s__[Ruminococcus]_gnavus
otu4742	6.0	13.0	0.0	0.0	0.0	1.0	1.0	0.0	k__Bacteria; p__Actinobacteria; c__Actinobacteria; o__Actinomycetales; f__Propionibacteriaceae; g__Propionibacterium; s__Propionibacterium_acnes
otu4873	0.0	0.0	0.0	21.0	0.0	0.0	0.0	0.0	k__Bacteria; p__Firmicutes; c__Clostridia; o__Clostridiales; f__Lachnospiraceae; g__Unclassified_Lachnospiraceae; s__Unclassified_Lachnospiraceae
otu5192	0.0	0.0	0.0	21.0	0.0	0.0	0.0	0.0	k__Bacteria; p__Bacteroidetes; c__Bacteroidia; o__Bacteroidales; f__Bacteroidaceae; g__Bacteroides; s__Unclassified_Bacteroides
otu5220	0.0	0.0	0.0	21.0	0.0	0.0	0.0	0.0	k__Bacteria; p__Firmicutes; c__Clostridia; o__Clostridiales; f__Lachnospiraceae; g__Unclassified_Lachnospiraceae; s__Unclassified_Lachnospiraceae
otu5915	16.0	5.0	0.0	0.0	0.0	0.0	0.0	0.0	k__Bacteria; p__Acidobacteria; c__Solibacteres; o__Solibacterales; f__Unclassified_Solibacterales; g__Unclassified_Solibacterales; s__Unclassified_Solibacterales
otu6276	11.0	10.0	0.0	0.0	0.0	0.0	0.0	0.0	k__Bacteria; p__Bacteroidetes; c__Bacteroidia; o__Bacteroidales; f__[Paraprevotellaceae]; g__[Prevotella]; s__Unclassified_[Prevotella]
otu6763	0.0	9.0	0.0	12.0	0.0	0.0	0.0	0.0	k__Bacteria; p__Firmicutes; c__Clostridia; o__Clostridiales; f__Lachnospiraceae; g__Unclassified_Lachnospiraceae; s__Unclassified_Lachnospiraceae
otu7223	0.0	3.0	0.0	0.0	0.0	18.0	0.0	0.0	k__Bacteria; p__Bacteroidetes; c__Bacteroidia; o__Bacteroidales; f__Bacteroidaceae; g__Bacteroides; s__Unclassified_Bacteroides
otu7253	14.0	7.0	0.0	0.0	0.0	0.0	0.0	0.0	k__Bacteria; p__Actinobacteria; c__Actinobacteria; o__Actinomycetales; f__Corynebacteriaceae; g__Corynebacterium; s__Unclassified_Corynebacterium
otu7283	0.0	21.0	0.0	0.0	0.0	0.0	0.0	0.0	k__Bacteria; p__Firmicutes; c__Bacilli; o__Lactobacillales; f__Lactobacillaceae; g__Lactobacillus; s__Unclassified_Lactobacillus
otu7468	0.0	0.0	0.0	0.0	0.0	21.0	0.0	0.0	k__Bacteria; p__Bacteroidetes; c__Bacteroidia; o__Bacteroidales; f__Bacteroidaceae; g__Bacteroides; s__Bacteroides_eggerthii
otu7630	11.0	10.0	0.0	0.0	0.0	0.0	0.0	0.0	k__Bacteria; p__Firmicutes; c__Clostridia; o__Clostridiales; f__Ruminococcaceae; g__Unclassified_Ruminococcaceae; s__Unclassified_Ruminococcaceae
otu7766	17.0	4.0	0.0	0.0	0.0	0.0	0.0	0.0	k__Bacteria; p__Bacteroidetes; c__Bacteroidia; o__Bacteroidales; f__Porphyromonadaceae; g__Porphyromonas; s__Unclassified_Porphyromonas
otu275	0.0	0.0	0.0	1.0	4.0	14.0	1.0	0.0	k__Bacteria; p__Firmicutes; c__Clostridia; o__Clostridiales; f__Lachnospiraceae; g__Unclassified_Lachnospiraceae; s__Unclassified_Lachnospiraceae
otu620	0.0	0.0	0.0	0.0	20.0	0.0	0.0	0.0	k__Bacteria; p__Bacteroidetes; c__Bacteroidia; o__Bacteroidales; f__Bacteroidaceae; g__Bacteroides; s__Bacteroides_ovatus
otu1182	0.0	0.0	0.0	20.0	0.0	0.0	0.0	0.0	k__Bacteria; p__Firmicutes; c__Clostridia; o__Clostridiales; f__Veillonellaceae; g__Megamonas; s__Unclassified_Megamonas
otu1279	0.0	13.0	6.0	0.0	0.0	0.0	0.0	1.0	k__Bacteria; p__Proteobacteria; c__Alphaproteobacteria; o__Sphingomonadales; f__Sphingomonadaceae; g__Sphingobium; s__Unclassified_Sphingobium
otu1305	0.0	0.0	0.0	20.0	0.0	0.0	0.0	0.0	k__Bacteria; p__Bacteroidetes; c__Bacteroidia; o__Bacteroidales; f__Bacteroidaceae; g__Bacteroides; s__Unclassified_Bacteroides
otu1452	0.0	20.0	0.0	0.0	0.0	0.0	0.0	0.0	k__Bacteria; p__Firmicutes; c__Clostridia; o__Clostridiales; f__Ruminococcaceae; g__Oscillospira; s__Unclassified_Oscillospira
otu1552	0.0	0.0	0.0	1.0	19.0	0.0	0.0	0.0	k__Bacteria; p__Firmicutes; c__Clostridia; o__Clostridiales; f__Ruminococcaceae; g__Oscillospira; s__Unclassified_Oscillospira
otu1655	0.0	20.0	0.0	0.0	0.0	0.0	0.0	0.0	k__Bacteria; p__Actinobacteria; c__Coriobacteriia; o__Coriobacteriales; f__Coriobacteriaceae; g__Adlercreutzia; s__Unclassified_Adlercreutzia
otu2516	9.0	11.0	0.0	0.0	0.0	0.0	0.0	0.0	k__Bacteria; p__Firmicutes; c__Bacilli; o__Lactobacillales; f__Lactobacillaceae; g__Lactobacillus; s__Unclassified_Lactobacillus
otu2865	0.0	20.0	0.0	0.0	0.0	0.0	0.0	0.0	k__Bacteria; p__Bacteroidetes; c__Bacteroidia; o__Bacteroidales; f__[Barnesiellaceae]; g__Unclassified_[Barnesiellaceae]; s__Unclassified_[Barnesiellaceae]
otu3405	0.0	20.0	0.0	0.0	0.0	0.0	0.0	0.0	k__Bacteria; p__Bacteroidetes; c__Bacteroidia; o__Bacteroidales; f__S24-7; g__Unclassified_S24-7; s__Unclassified_S24-7
otu3534	15.0	5.0	0.0	0.0	0.0	0.0	0.0	0.0	k__Bacteria; p__Firmicutes; c__Bacilli; o__Lactobacillales; f__Lactobacillaceae; g__Lactobacillus; s__Unclassified_Lactobacillus
otu3595	0.0	0.0	0.0	10.0	0.0	8.0	2.0	0.0	k__Bacteria; p__Bacteroidetes; c__Bacteroidia; o__Bacteroidales; f__Bacteroidaceae; g__Bacteroides; s__Unclassified_Bacteroides
otu3636	4.0	2.0	0.0	0.0	0.0	14.0	0.0	0.0	k__Bacteria; p__Firmicutes; c__Erysipelotrichi; o__Erysipelotrichales; f__Erysipelotrichaceae; g__Unclassified_Erysipelotrichaceae; s__Unclassified_Erysipelotrichaceae
otu3779	6.0	14.0	0.0	0.0	0.0	0.0	0.0	0.0	k__Bacteria; p__Firmicutes; c__Clostridia; o__Clostridiales; f__Unclassified_Clostridiales; g__Unclassified_Clostridiales; s__Unclassified_Clostridiales
otu4055	5.0	13.0	1.0	0.0	0.0	0.0	0.0	1.0	k__Bacteria; p__Proteobacteria; c__Betaproteobacteria; o__Burkholderiales; f__Alcaligenaceae; g__Achromobacter; s__Unclassified_Achromobacter
otu4108	0.0	20.0	0.0	0.0	0.0	0.0	0.0	0.0	k__Bacteria; p__Firmicutes; c__Clostridia; o__Clostridiales; f__Unclassified_Clostridiales; g__Unclassified_Clostridiales; s__Unclassified_Clostridiales
otu4541	0.0	0.0	0.0	16.0	0.0	0.0	4.0	0.0	k__Bacteria; p__Bacteroidetes; c__Bacteroidia; o__Bacteroidales; f__Bacteroidaceae; g__Bacteroides; s__Unclassified_Bacteroides
otu5062	0.0	0.0	0.0	0.0	0.0	13.0	7.0	0.0	k__Bacteria; p__Proteobacteria; c__Gammaproteobacteria; o__Enterobacteriales; f__Enterobacteriaceae; g__Trabulsiella; s__Trabulsiella_farmeri
otu5271	0.0	20.0	0.0	0.0	0.0	0.0	0.0	0.0	k__Bacteria; p__Firmicutes; c__Bacilli; o__Lactobacillales; f__Lactobacillaceae; g__Lactobacillus; s__Unclassified_Lactobacillus
otu5583	0.0	0.0	0.0	0.0	11.0	3.0	6.0	0.0	k__Bacteria; p__Firmicutes; c__Erysipelotrichi; o__Erysipelotrichales; f__Erysipelotrichaceae; g__Unclassified_Erysipelotrichaceae; s__Unclassified_Erysipelotrichaceae
otu6793	0.0	0.0	0.0	20.0	0.0	0.0	0.0	0.0	k__Bacteria; p__Bacteroidetes; c__Bacteroidia; o__Bacteroidales; f__Bacteroidaceae; g__Bacteroides; s__Bacteroides_ovatus
otu401	7.0	12.0	0.0	0.0	0.0	0.0	0.0	0.0	k__Bacteria; p__Proteobacteria; c__Gammaproteobacteria; o__Legionellales; f__Coxiellaceae; g__Unclassified_Coxiellaceae; s__Unclassified_Coxiellaceae
otu917	3.0	16.0	0.0	0.0	0.0	0.0	0.0	0.0	k__Bacteria; p__Firmicutes; c__Clostridia; o__Clostridiales; f__Ruminococcaceae; g__Unclassified_Ruminococcaceae; s__Unclassified_Ruminococcaceae
otu1522	0.0	19.0	0.0	0.0	0.0	0.0	0.0	0.0	k__Bacteria; p__Firmicutes; c__Clostridia; o__Clostridiales; f__Lachnospiraceae; g__Unclassified_Lachnospiraceae; s__Unclassified_Lachnospiraceae
otu1563	0.0	19.0	0.0	0.0	0.0	0.0	0.0	0.0	k__Bacteria; p__Firmicutes; c__Clostridia; o__Clostridiales; f__Ruminococcaceae; g__Unclassified_Ruminococcaceae; s__Unclassified_Ruminococcaceae
otu1951	12.0	6.0	1.0	0.0	0.0	0.0	0.0	0.0	k__Bacteria; p__Proteobacteria; c__Gammaproteobacteria; o__Pseudomonadales; f__Moraxellaceae; g__Perlucidibaca; s__Unclassified_Perlucidibaca
otu1958	0.0	0.0	0.0	15.0	0.0	1.0	3.0	0.0	k__Bacteria; p__Firmicutes; c__Clostridia; o__Clostridiales; f__Unclassified_Clostridiales; g__Unclassified_Clostridiales; s__Unclassified_Clostridiales
otu2012	0.0	0.0	0.0	0.0	0.0	19.0	0.0	0.0	k__Bacteria; p__Firmicutes; c__Clostridia; o__Clostridiales; f__Ruminococcaceae; g__Unclassified_Ruminococcaceae; s__Unclassified_Ruminococcaceae
otu2142	0.0	0.0	0.0	4.0	15.0	0.0	0.0	0.0	k__Bacteria; p__Firmicutes; c__Erysipelotrichi; o__Erysipelotrichales; f__Erysipelotrichaceae; g__[Eubacterium]; s__[Eubacterium]_dolichum
otu2323	0.0	0.0	0.0	16.0	0.0	0.0	3.0	0.0	k__Bacteria; p__Firmicutes; c__Clostridia; o__Clostridiales; f__Lachnospiraceae; g__Unclassified_Lachnospiraceae; s__Unclassified_Lachnospiraceae
otu2523	2.0	17.0	0.0	0.0	0.0	0.0	0.0	0.0	k__Bacteria; p__Proteobacteria; c__Deltaproteobacteria; o__Desulfovibrionales; f__Desulfovibrionaceae; g__Desulfovibrio; s__Unclassified_Desulfovibrio
otu2798	0.0	19.0	0.0	0.0	0.0	0.0	0.0	0.0	k__Bacteria; p__Firmicutes; c__Bacilli; o__Lactobacillales; f__Lactobacillaceae; g__Lactobacillus; s__Unclassified_Lactobacillus
otu3631	0.0	19.0	0.0	0.0	0.0	0.0	0.0	0.0	k__Bacteria; p__Firmicutes; c__Bacilli; o__Lactobacillales; f__Lactobacillaceae; g__Lactobacillus; s__Unclassified_Lactobacillus
otu4091	0.0	0.0	0.0	1.0	18.0	0.0	0.0	0.0	k__Bacteria; p__Bacteroidetes; c__Bacteroidia; o__Bacteroidales; f__Bacteroidaceae; g__Bacteroides; s__Bacteroides_ovatus
otu4125	1.0	0.0	0.0	0.0	0.0	18.0	0.0	0.0	k__Bacteria; p__Firmicutes; c__Clostridia; o__Clostridiales; f__Ruminococcaceae; g__Unclassified_Ruminococcaceae; s__Unclassified_Ruminococcaceae
otu4135	0.0	0.0	0.0	0.0	19.0	0.0	0.0	0.0	k__Bacteria; p__Proteobacteria; c__Gammaproteobacteria; o__Enterobacteriales; f__Enterobacteriaceae; g__Unclassified_Enterobacteriaceae; s__Unclassified_Enterobacteriaceae
otu4164	10.0	9.0	0.0	0.0	0.0	0.0	0.0	0.0	k__Bacteria; p__Proteobacteria; c__Gammaproteobacteria; o__Pseudomonadales; f__Moraxellaceae; g__Acinetobacter; s__Unclassified_Acinetobacter
otu4447	0.0	19.0	0.0	0.0	0.0	0.0	0.0	0.0	k__Bacteria; p__Firmicutes; c__Clostridia; o__SHA-98; f__Unclassified_SHA-98; g__Unclassified_SHA-98; s__Unclassified_SHA-98
otu4729	0.0	0.0	0.0	19.0	0.0	0.0	0.0	0.0	k__Bacteria; p__Firmicutes; c__Clostridia; o__Clostridiales; f__Lachnospiraceae; g__[Ruminococcus]; s__[Ruminococcus]_gnavus
otu5108	0.0	0.0	0.0	0.0	1.0	2.0	16.0	0.0	k__Bacteria; p__Firmicutes; c__Clostridia; o__Clostridiales; f__Lachnospiraceae; g__Unclassified_Lachnospiraceae; s__Unclassified_Lachnospiraceae
otu5396	11.0	8.0	0.0	0.0	0.0	0.0	0.0	0.0	k__Bacteria; p__Firmicutes; c__Clostridia; o__Clostridiales; f__Ruminococcaceae; g__Unclassified_Ruminococcaceae; s__Unclassified_Ruminococcaceae
otu5550	0.0	0.0	0.0	19.0	0.0	0.0	0.0	0.0	k__Bacteria; p__Firmicutes; c__Clostridia; o__Clostridiales; f__Lachnospiraceae; g__[Ruminococcus]; s__[Ruminococcus]_gnavus
otu5641	2.0	0.0	0.0	0.0	16.0	1.0	0.0	0.0	k__Bacteria; p__Bacteroidetes; c__Bacteroidia; o__Bacteroidales; f__Bacteroidaceae; g__Bacteroides; s__Unclassified_Bacteroides
otu5985	17.0	2.0	0.0	0.0	0.0	0.0	0.0	0.0	k__Bacteria; p__Bacteroidetes; c__Bacteroidia; o__Bacteroidales; f__S24-7; g__Unclassified_S24-7; s__Unclassified_S24-7
otu6185	0.0	0.0	0.0	18.0	0.0	1.0	0.0	0.0	k__Bacteria; p__Bacteroidetes; c__Bacteroidia; o__Bacteroidales; f__Bacteroidaceae; g__Bacteroides; s__Unclassified_Bacteroides
otu7000	16.0	2.0	0.0	0.0	0.0	0.0	1.0	0.0	k__Bacteria; p__Proteobacteria; c__Alphaproteobacteria; o__Rickettsiales; f__mitochondria; g__Zea; s__Zea_luxurians
otu7207	0.0	0.0	0.0	19.0	0.0	0.0	0.0	0.0	k__Bacteria; p__Bacteroidetes; c__Bacteroidia; o__Bacteroidales; f__Bacteroidaceae; g__Bacteroides; s__Unclassified_Bacteroides
otu7262	0.0	0.0	14.0	0.0	0.0	0.0	0.0	5.0	k__Bacteria; p__Proteobacteria; c__Gammaproteobacteria; o__Alteromonadales; f__[Chromatiaceae]; g__Unclassified_[Chromatiaceae]; s__Unclassified_[Chromatiaceae]
otu7536	0.0	0.0	0.0	0.0	6.0	0.0	13.0	0.0	k__Bacteria; p__Firmicutes; c__Clostridia; o__Clostridiales; f__Peptostreptococcaceae; g__[Clostridium]; s__[Clostridium]_difficile
otu7772	11.0	6.0	2.0	0.0	0.0	0.0	0.0	0.0	k__Bacteria; p__Firmicutes; c__Clostridia; o__Clostridiales; f__Unclassified_Clostridiales; g__Unclassified_Clostridiales; s__Unclassified_Clostridiales
otu24	0.0	18.0	0.0	0.0	0.0	0.0	0.0	0.0	k__Bacteria; p__Bacteroidetes; c__Bacteroidia; o__Bacteroidales; f__Prevotellaceae; g__Unclassified_Prevotellaceae; s__Unclassified_Prevotellaceae
otu437	0.0	0.0	1.0	0.0	0.0	0.0	0.0	17.0	k__Bacteria; p__Firmicutes; c__Bacilli; o__Lactobacillales; f__Enterococcaceae; g__Enterococcus; s__Unclassified_Enterococcus
otu582	0.0	0.0	0.0	0.0	18.0	0.0	0.0	0.0	k__Bacteria; p__Bacteroidetes; c__Bacteroidia; o__Bacteroidales; f__Bacteroidaceae; g__Bacteroides; s__Bacteroides_ovatus
otu756	0.0	12.0	0.0	0.0	0.0	6.0	0.0	0.0	k__Bacteria; p__Firmicutes; c__Clostridia; o__Clostridiales; f__Christensenellaceae; g__Christensenella; s__Unclassified_Christensenella
otu854	0.0	18.0	0.0	0.0	0.0	0.0	0.0	0.0	k__Bacteria; p__Firmicutes; c__Clostridia; o__Clostridiales; f__Lachnospiraceae; g__Dorea; s__Dorea_formicigenerans
otu1151	0.0	0.0	0.0	17.0	1.0	0.0	0.0	0.0	k__Bacteria; p__Firmicutes; c__Clostridia; o__Clostridiales; f__Lachnospiraceae; g__Unclassified_Lachnospiraceae; s__Unclassified_Lachnospiraceae
otu1278	0.0	0.0	0.0	12.0	0.0	4.0	2.0	0.0	k__Bacteria; p__Firmicutes; c__Clostridia; o__Clostridiales; f__Lachnospiraceae; g__Unclassified_Lachnospiraceae; s__Unclassified_Lachnospiraceae
otu1889	0.0	6.0	2.0	0.0	0.0	0.0	9.0	1.0	k__Bacteria; p__Firmicutes; c__Bacilli; o__Lactobacillales; f__Streptococcaceae; g__Unclassified_Streptococcaceae; s__Unclassified_Streptococcaceae
otu2295	7.0	11.0	0.0	0.0	0.0	0.0	0.0	0.0	k__Bacteria; p__Firmicutes; c__Clostridia; o__Clostridiales; f__Unclassified_Clostridiales; g__Unclassified_Clostridiales; s__Unclassified_Clostridiales
otu2532	0.0	0.0	0.0	12.0	0.0	5.0	1.0	0.0	k__Bacteria; p__Bacteroidetes; c__Bacteroidia; o__Bacteroidales; f__Bacteroidaceae; g__Bacteroides; s__Unclassified_Bacteroides
otu2619	4.0	14.0	0.0	0.0	0.0	0.0	0.0	0.0	k__Bacteria; p__Firmicutes; c__Bacilli; o__Lactobacillales; f__Lactobacillaceae; g__Lactobacillus; s__Unclassified_Lactobacillus
otu2845	0.0	0.0	0.0	17.0	0.0	1.0	0.0	0.0	k__Bacteria; p__Bacteroidetes; c__Bacteroidia; o__Bacteroidales; f__Bacteroidaceae; g__Bacteroides; s__Unclassified_Bacteroides
otu3272	0.0	0.0	0.0	18.0	0.0	0.0	0.0	0.0	k__Bacteria; p__Bacteroidetes; c__Bacteroidia; o__Bacteroidales; f__Bacteroidaceae; g__Bacteroides; s__Unclassified_Bacteroides
otu3482	0.0	0.0	0.0	15.0	0.0	0.0	1.0	2.0	k__Bacteria; p__Firmicutes; c__Clostridia; o__Clostridiales; f__Lachnospiraceae; g__Unclassified_Lachnospiraceae; s__Unclassified_Lachnospiraceae
otu3678	10.0	8.0	0.0	0.0	0.0	0.0	0.0	0.0	k__Bacteria; p__Proteobacteria; c__Betaproteobacteria; o__Burkholderiales; f__Comamonadaceae; g__Comamonas; s__Unclassified_Comamonas
otu3904	0.0	0.0	0.0	0.0	0.0	0.0	0.0	18.0	k__Bacteria; p__Firmicutes; c__Clostridia; o__Clostridiales; f__Ruminococcaceae; g__Unclassified_Ruminococcaceae; s__Unclassified_Ruminococcaceae
otu3914	0.0	0.0	0.0	0.0	0.0	0.0	18.0	0.0	k__Bacteria; p__Bacteroidetes; c__Bacteroidia; o__Bacteroidales; f__Bacteroidaceae; g__Bacteroides; s__Unclassified_Bacteroides
otu4347	0.0	0.0	0.0	17.0	0.0	0.0	1.0	0.0	k__Bacteria; p__Bacteroidetes; c__Bacteroidia; o__Bacteroidales; f__Bacteroidaceae; g__Bacteroides; s__Unclassified_Bacteroides
otu5402	3.0	0.0	0.0	0.0	0.0	1.0	0.0	14.0	k__Bacteria; p__Firmicutes; c__Clostridia; o__Clostridiales; f__Ruminococcaceae; g__Unclassified_Ruminococcaceae; s__Unclassified_Ruminococcaceae
otu5620	0.0	18.0	0.0	0.0	0.0	0.0	0.0	0.0	k__Bacteria; p__Bacteroidetes; c__Bacteroidia; o__Bacteroidales; f__Prevotellaceae; g__Unclassified_Prevotellaceae; s__Unclassified_Prevotellaceae
otu5885	3.0	15.0	0.0	0.0	0.0	0.0	0.0	0.0	k__Bacteria; p__Firmicutes; c__Clostridia; o__Clostridiales; f__Clostridiaceae; g__SMB53; s__Unclassified_SMB53
otu5916	0.0	0.0	0.0	11.0	1.0	0.0	6.0	0.0	k__Bacteria; p__Firmicutes; c__Clostridia; o__Clostridiales; f__Lachnospiraceae; g__Unclassified_Lachnospiraceae; s__Unclassified_Lachnospiraceae
otu6311	18.0	0.0	0.0	0.0	0.0	0.0	0.0	0.0	k__Bacteria; p__Firmicutes; c__Bacilli; o__Lactobacillales; f__Lactobacillaceae; g__Unclassified_Lactobacillaceae; s__Unclassified_Lactobacillaceae
otu6548	0.0	8.0	10.0	0.0	0.0	0.0	0.0	0.0	k__Bacteria; p__Firmicutes; c__Bacilli; o__Lactobacillales; f__Streptococcaceae; g__Lactococcus; s__Unclassified_Lactococcus
otu6729	12.0	6.0	0.0	0.0	0.0	0.0	0.0	0.0	k__Bacteria; p__Firmicutes; c__Bacilli; o__Lactobacillales; f__Aerococcaceae; g__Unclassified_Aerococcaceae; s__Unclassified_Aerococcaceae
otu6750	0.0	15.0	0.0	0.0	0.0	3.0	0.0	0.0	k__Bacteria; p__Firmicutes; c__Clostridia; o__Clostridiales; f__Lachnospiraceae; g__Dorea; s__Unclassified_Dorea
otu6933	0.0	0.0	0.0	1.0	0.0	0.0	17.0	0.0	k__Bacteria; p__Firmicutes; c__Clostridia; o__Clostridiales; f__Lachnospiraceae; g__[Ruminococcus]; s__[Ruminococcus]_gnavus
otu6970	0.0	0.0	0.0	17.0	0.0	0.0	1.0	0.0	k__Bacteria; p__Bacteroidetes; c__Bacteroidia; o__Bacteroidales; f__Bacteroidaceae; g__Bacteroides; s__Unclassified_Bacteroides
otu7177	0.0	0.0	0.0	16.0	0.0	2.0	0.0	0.0	k__Bacteria; p__Bacteroidetes; c__Bacteroidia; o__Bacteroidales; f__Bacteroidaceae; g__Bacteroides; s__Unclassified_Bacteroides
otu7480	0.0	0.0	0.0	5.0	0.0	3.0	10.0	0.0	k__Bacteria; p__Firmicutes; c__Clostridia; o__Clostridiales; f__Lachnospiraceae; g__Unclassified_Lachnospiraceae; s__Unclassified_Lachnospiraceae
otu7512	0.0	0.0	1.0	3.0	0.0	0.0	13.0	1.0	k__Bacteria; p__Firmicutes; c__Clostridia; o__Clostridiales; f__Lachnospiraceae; g__[Ruminococcus]; s__[Ruminococcus]_gnavus
otu7616	0.0	0.0	0.0	12.0	0.0	0.0	6.0	0.0	k__Bacteria; p__Firmicutes; c__Clostridia; o__Clostridiales; f__Ruminococcaceae; g__Unclassified_Ruminococcaceae; s__Unclassified_Ruminococcaceae
otu191	6.0	9.0	0.0	0.0	0.0	1.0	1.0	0.0	k__Bacteria; p__Proteobacteria; c__Alphaproteobacteria; o__Rhizobiales; f__Unclassified_Rhizobiales; g__Unclassified_Rhizobiales; s__Unclassified_Rhizobiales
otu304	13.0	4.0	0.0	0.0	0.0	0.0	0.0	0.0	k__Bacteria; p__Firmicutes; c__Bacilli; o__Bacillales; f__Bacillaceae; g__Oceanobacillus; s__Oceanobacillus_chironomi
otu316	0.0	17.0	0.0	0.0	0.0	0.0	0.0	0.0	k__Bacteria; p__Firmicutes; c__Clostridia; o__Clostridiales; f__Unclassified_Clostridiales; g__Unclassified_Clostridiales; s__Unclassified_Clostridiales
otu368	0.0	0.0	0.0	17.0	0.0	0.0	0.0	0.0	k__Bacteria; p__Firmicutes; c__Clostridia; o__Clostridiales; f__Lachnospiraceae; g__Unclassified_Lachnospiraceae; s__Unclassified_Lachnospiraceae
otu493	0.0	0.0	0.0	0.0	0.0	9.0	8.0	0.0	k__Bacteria; p__Bacteroidetes; c__Bacteroidia; o__Bacteroidales; f__Porphyromonadaceae; g__Parabacteroides; s__Parabacteroides_distasonis
otu610	2.0	0.0	1.0	8.0	0.0	1.0	5.0	0.0	k__Bacteria; p__Bacteroidetes; c__Bacteroidia; o__Bacteroidales; f__Bacteroidaceae; g__Bacteroides; s__Unclassified_Bacteroides
otu902	0.0	0.0	0.0	0.0	0.0	0.0	17.0	0.0	k__Bacteria; p__Firmicutes; c__Bacilli; o__Bacillales; f__Bacillaceae; g__Anaerobacillus; s__Unclassified_Anaerobacillus
otu1148	0.0	17.0	0.0	0.0	0.0	0.0	0.0	0.0	k__Bacteria; p__Firmicutes; c__Clostridia; o__Clostridiales; f__Lachnospiraceae; g__Blautia; s__Unclassified_Blautia
otu1172	4.0	5.0	0.0	0.0	0.0	8.0	0.0	0.0	k__Bacteria; p__Firmicutes; c__Erysipelotrichi; o__Erysipelotrichales; f__Erysipelotrichaceae; g__[Eubacterium]; s__[Eubacterium]_dolichum
otu1248	0.0	0.0	0.0	1.0	0.0	2.0	14.0	0.0	k__Bacteria; p__Actinobacteria; c__Actinobacteria; o__Bifidobacteriales; f__Bifidobacteriaceae; g__Bifidobacterium; s__Bifidobacterium_longum
otu1458	0.0	17.0	0.0	0.0	0.0	0.0	0.0	0.0	k__Bacteria; p__Firmicutes; c__Clostridia; o__Clostridiales; f__Clostridiaceae; g__Unclassified_Clostridiaceae; s__Unclassified_Clostridiaceae
otu1542	0.0	0.0	0.0	12.0	0.0	5.0	0.0	0.0	k__Bacteria; p__Bacteroidetes; c__Bacteroidia; o__Bacteroidales; f__Bacteroidaceae; g__Bacteroides; s__Unclassified_Bacteroides
otu1548	0.0	17.0	0.0	0.0	0.0	0.0	0.0	0.0	k__Bacteria; p__Firmicutes; c__Clostridia; o__Clostridiales; f__Ruminococcaceae; g__Unclassified_Ruminococcaceae; s__Unclassified_Ruminococcaceae
otu2033	4.0	13.0	0.0	0.0	0.0	0.0	0.0	0.0	k__Bacteria; p__Firmicutes; c__Bacilli; o__Lactobacillales; f__Lactobacillaceae; g__Lactobacillus; s__Unclassified_Lactobacillus
otu2179	0.0	1.0	0.0	0.0	0.0	1.0	15.0	0.0	k__Bacteria; p__Proteobacteria; c__Gammaproteobacteria; o__Enterobacteriales; f__Enterobacteriaceae; g__Unclassified_Enterobacteriaceae; s__Unclassified_Enterobacteriaceae
otu2200	16.0	0.0	0.0	0.0	0.0	0.0	1.0	0.0	k__Bacteria; p__Bacteroidetes; c__Sphingobacteriia; o__Sphingobacteriales; f__Unclassified_Sphingobacteriales; g__Unclassified_Sphingobacteriales; s__Unclassified_Sphingobacteriales
otu2227	0.0	17.0	0.0	0.0	0.0	0.0	0.0	0.0	k__Bacteria; p__Firmicutes; c__Bacilli; o__Lactobacillales; f__Lactobacillaceae; g__Lactobacillus; s__Unclassified_Lactobacillus
otu2561	0.0	17.0	0.0	0.0	0.0	0.0	0.0	0.0	k__Bacteria; p__Firmicutes; c__Clostridia; o__Clostridiales; f__Clostridiaceae; g__Clostridium; s__Unclassified_Clostridium
otu2598	0.0	17.0	0.0	0.0	0.0	0.0	0.0	0.0	k__Bacteria; p__Firmicutes; c__Clostridia; o__Clostridiales; f__Ruminococcaceae; g__Ruminococcus; s__Unclassified_Ruminococcus
otu2744	0.0	17.0	0.0	0.0	0.0	0.0	0.0	0.0	k__Bacteria; p__Firmicutes; c__Clostridia; o__Clostridiales; f__[Mogibacteriaceae]; g__Unclassified_[Mogibacteriaceae]; s__Unclassified_[Mogibacteriaceae]
otu3163	10.0	7.0	0.0	0.0	0.0	0.0	0.0	0.0	k__Bacteria; p__Actinobacteria; c__Coriobacteriia; o__Coriobacteriales; f__Coriobacteriaceae; g__Adlercreutzia; s__Unclassified_Adlercreutzia
otu3818	0.0	14.0	0.0	0.0	0.0	3.0	0.0	0.0	k__Bacteria; p__Firmicutes; c__Clostridia; o__Clostridiales; f__Lachnospiraceae; g__Unclassified_Lachnospiraceae; s__Unclassified_Lachnospiraceae
otu3848	2.0	0.0	1.0	9.0	0.0	1.0	4.0	0.0	k__Bacteria; p__Bacteroidetes; c__Bacteroidia; o__Bacteroidales; f__Bacteroidaceae; g__Bacteroides; s__Unclassified_Bacteroides
otu4539	6.0	11.0	0.0	0.0	0.0	0.0	0.0	0.0	k__Bacteria; p__Cyanobacteria; c__Synechococcophycideae; o__Synechococcales; f__Synechococcaceae; g__Synechococcus; s__Unclassified_Synechococcus
otu4727	0.0	17.0	0.0	0.0	0.0	0.0	0.0	0.0	k__Bacteria; p__Firmicutes; c__Clostridia; o__Clostridiales; f__Clostridiaceae; g__Clostridium; s__Unclassified_Clostridium
otu4749	0.0	0.0	0.0	9.0	0.0	0.0	8.0	0.0	k__Bacteria; p__Bacteroidetes; c__Bacteroidia; o__Bacteroidales; f__Bacteroidaceae; g__Bacteroides; s__Unclassified_Bacteroides
otu4812	1.0	0.0	0.0	2.0	0.0	10.0	0.0	4.0	k__Bacteria; p__Bacteroidetes; c__Bacteroidia; o__Bacteroidales; f__Bacteroidaceae; g__Bacteroides; s__Unclassified_Bacteroides
otu4977	0.0	0.0	0.0	0.0	0.0	17.0	0.0	0.0	k__Bacteria; p__Firmicutes; c__Clostridia; o__Clostridiales; f__Ruminococcaceae; g__Ruminococcus; s__Unclassified_Ruminococcus
otu5030	0.0	17.0	0.0	0.0	0.0	0.0	0.0	0.0	k__Bacteria; p__Firmicutes; c__Clostridia; o__Clostridiales; f__Ruminococcaceae; g__Unclassified_Ruminococcaceae; s__Unclassified_Ruminococcaceae
otu5050	0.0	0.0	0.0	0.0	17.0	0.0	0.0	0.0	k__Bacteria; p__Firmicutes; c__Clostridia; o__Clostridiales; f__Lachnospiraceae; g__Unclassified_Lachnospiraceae; s__Unclassified_Lachnospiraceae
otu5159	4.0	13.0	0.0	0.0	0.0	0.0	0.0	0.0	k__Bacteria; p__Firmicutes; c__Clostridia; o__Clostridiales; f__Lachnospiraceae; g__Unclassified_Lachnospiraceae; s__Unclassified_Lachnospiraceae
otu5391	0.0	0.0	2.0	11.0	0.0	0.0	4.0	0.0	k__Bacteria; p__Bacteroidetes; c__Bacteroidia; o__Bacteroidales; f__Bacteroidaceae; g__Bacteroides; s__Unclassified_Bacteroides
otu5554	8.0	7.0	0.0	0.0	0.0	2.0	0.0	0.0	k__Bacteria; p__Actinobacteria; c__Actinobacteria; o__Actinomycetales; f__Micrococcaceae; g__Unclassified_Micrococcaceae; s__Unclassified_Micrococcaceae
otu5699	0.0	0.0	0.0	17.0	0.0	0.0	0.0	0.0	k__Bacteria; p__Firmicutes; c__Clostridia; o__Clostridiales; f__Lachnospiraceae; g__[Ruminococcus]; s__[Ruminococcus]_gnavus
otu6199	0.0	0.0	1.0	13.0	0.0	0.0	3.0	0.0	k__Bacteria; p__Firmicutes; c__Clostridia; o__Clostridiales; f__Unclassified_Clostridiales; g__Unclassified_Clostridiales; s__Unclassified_Clostridiales
otu6226	0.0	0.0	0.0	0.0	0.0	4.0	2.0	11.0	k__Bacteria; p__Firmicutes; c__Clostridia; o__Clostridiales; f__Ruminococcaceae; g__Faecalibacterium; s__Faecalibacterium_prausnitzii
otu6297	0.0	0.0	0.0	14.0	0.0	0.0	3.0	0.0	k__Bacteria; p__Firmicutes; c__Clostridia; o__Clostridiales; f__Unclassified_Clostridiales; g__Unclassified_Clostridiales; s__Unclassified_Clostridiales
otu6526	0.0	0.0	0.0	9.0	0.0	8.0	0.0	0.0	k__Bacteria; p__Bacteroidetes; c__Bacteroidia; o__Bacteroidales; f__Bacteroidaceae; g__Bacteroides; s__Unclassified_Bacteroides
otu6641	0.0	0.0	0.0	13.0	0.0	0.0	4.0	0.0	k__Bacteria; p__Firmicutes; c__Clostridia; o__Clostridiales; f__Lachnospiraceae; g__[Ruminococcus]; s__[Ruminococcus]_gnavus
otu6660	5.0	10.0	0.0	0.0	0.0	2.0	0.0	0.0	k__Bacteria; p__Proteobacteria; c__Alphaproteobacteria; o__Caulobacterales; f__Caulobacteraceae; g__Unclassified_Caulobacteraceae; s__Unclassified_Caulobacteraceae
otu6807	11.0	6.0	0.0	0.0	0.0	0.0	0.0	0.0	k__Bacteria; p__Bacteroidetes; c__Flavobacteriia; o__Flavobacteriales; f__[Weeksellaceae]; g__Chryseobacterium; s__Unclassified_Chryseobacterium
otu6850	0.0	17.0	0.0	0.0	0.0	0.0	0.0	0.0	k__Bacteria; p__Firmicutes; c__Clostridia; o__Clostridiales; f__Lachnospiraceae; g__[Ruminococcus]; s__[Ruminococcus]_gnavus
otu6853	17.0	0.0	0.0	0.0	0.0	0.0	0.0	0.0	k__Bacteria; p__Bacteroidetes; c__Bacteroidia; o__Bacteroidales; f__Prevotellaceae; g__Prevotella; s__Unclassified_Prevotella
otu6917	0.0	17.0	0.0	0.0	0.0	0.0	0.0	0.0	k__Bacteria; p__Firmicutes; c__Clostridia; o__Clostridiales; f__Unclassified_Clostridiales; g__Unclassified_Clostridiales; s__Unclassified_Clostridiales
otu7251	0.0	0.0	0.0	15.0	2.0	0.0	0.0	0.0	k__Bacteria; p__Firmicutes; c__Clostridia; o__Clostridiales; f__Lachnospiraceae; g__Unclassified_Lachnospiraceae; s__Unclassified_Lachnospiraceae
otu7257	0.0	0.0	0.0	16.0	0.0	1.0	0.0	0.0	k__Bacteria; p__Firmicutes; c__Clostridia; o__Clostridiales; f__Lachnospiraceae; g__Unclassified_Lachnospiraceae; s__Unclassified_Lachnospiraceae
otu7516	6.0	3.0	0.0	0.0	0.0	8.0	0.0	0.0	k__Bacteria; p__Firmicutes; c__Clostridia; o__Clostridiales; f__Ruminococcaceae; g__Unclassified_Ruminococcaceae; s__Unclassified_Ruminococcaceae
otu7673	0.0	0.0	0.0	16.0	0.0	0.0	1.0	0.0	k__Bacteria; p__Firmicutes; c__Clostridia; o__Clostridiales; f__Lachnospiraceae; g__[Ruminococcus]; s__[Ruminococcus]_gnavus
otu19	0.0	0.0	0.0	0.0	14.0	0.0	2.0	0.0	k__Bacteria; p__Firmicutes; c__Clostridia; o__Clostridiales; f__Ruminococcaceae; g__Faecalibacterium; s__Faecalibacterium_prausnitzii
otu49	2.0	14.0	0.0	0.0	0.0	0.0	0.0	0.0	k__Bacteria; p__Firmicutes; c__Bacilli; o__Lactobacillales; f__Lactobacillaceae; g__Lactobacillus; s__Unclassified_Lactobacillus
otu85	9.0	2.0	1.0	0.0	0.0	0.0	3.0	1.0	k__Bacteria; p__Actinobacteria; c__Actinobacteria; o__Actinomycetales; f__Micrococcaceae; g__Rothia; s__Rothia_mucilaginosa
otu497	0.0	0.0	0.0	0.0	16.0	0.0	0.0	0.0	k__Bacteria; p__Firmicutes; c__Clostridia; o__Clostridiales; f__Lachnospiraceae; g__Robinsoniella; s__Robinsoniella_peoriensis
otu586	0.0	0.0	0.0	16.0	0.0	0.0	0.0	0.0	k__Bacteria; p__Firmicutes; c__Clostridia; o__Clostridiales; f__Lachnospiraceae; g__Clostridium; s__Clostridium_hathewayi
otu798	0.0	16.0	0.0	0.0	0.0	0.0	0.0	0.0	k__Bacteria; p__Firmicutes; c__Clostridia; o__Clostridiales; f__Lachnospiraceae; g__Blautia; s__Unclassified_Blautia
otu828	0.0	0.0	0.0	0.0	0.0	3.0	0.0	13.0	k__Bacteria; p__Firmicutes; c__Clostridia; o__Clostridiales; f__Ruminococcaceae; g__Unclassified_Ruminococcaceae; s__Unclassified_Ruminococcaceae
otu1392	0.0	3.0	0.0	0.0	0.0	13.0	0.0	0.0	k__Bacteria; p__Firmicutes; c__Clostridia; o__Clostridiales; f__Lachnospiraceae; g__Dorea; s__Unclassified_Dorea
otu1564	0.0	16.0	0.0	0.0	0.0	0.0	0.0	0.0	k__Bacteria; p__Bacteroidetes; c__Bacteroidia; o__Bacteroidales; f__Prevotellaceae; g__Prevotella; s__Unclassified_Prevotella
otu1757	2.0	12.0	0.0	0.0	0.0	2.0	0.0	0.0	k__Bacteria; p__Firmicutes; c__Clostridia; o__Clostridiales; f__Unclassified_Clostridiales; g__Unclassified_Clostridiales; s__Unclassified_Clostridiales
otu1864	12.0	4.0	0.0	0.0	0.0	0.0	0.0	0.0	k__Bacteria; p__Proteobacteria; c__Alphaproteobacteria; o__Rhizobiales; f__Hyphomicrobiaceae; g__Rhodoplanes; s__Unclassified_Rhodoplanes
otu1914	0.0	0.0	0.0	16.0	0.0	0.0	0.0	0.0	k__Bacteria; p__Firmicutes; c__Clostridia; o__Clostridiales; f__Lachnospiraceae; g__Unclassified_Lachnospiraceae; s__Unclassified_Lachnospiraceae
otu1928	0.0	0.0	0.0	13.0	0.0	3.0	0.0	0.0	k__Bacteria; p__Bacteroidetes; c__Bacteroidia; o__Bacteroidales; f__Bacteroidaceae; g__Bacteroides; s__Unclassified_Bacteroides
otu1937	0.0	13.0	3.0	0.0	0.0	0.0	0.0	0.0	k__Bacteria; p__Firmicutes; c__Clostridia; o__Clostridiales; f__Ruminococcaceae; g__Oscillospira; s__Unclassified_Oscillospira
otu2184	0.0	0.0	0.0	16.0	0.0	0.0	0.0	0.0	k__Bacteria; p__Firmicutes; c__Clostridia; o__Clostridiales; f__Veillonellaceae; g__Megamonas; s__Unclassified_Megamonas
otu3029	0.0	0.0	1.0	0.0	2.0	0.0	13.0	0.0	k__Bacteria; p__Bacteroidetes; c__Bacteroidia; o__Bacteroidales; f__Bacteroidaceae; g__Bacteroides; s__Unclassified_Bacteroides
otu3371	0.0	0.0	0.0	0.0	0.0	16.0	0.0	0.0	k__Bacteria; p__Firmicutes; c__Clostridia; o__Clostridiales; f__[Mogibacteriaceae]; g__Unclassified_[Mogibacteriaceae]; s__Unclassified_[Mogibacteriaceae]
otu3387	0.0	0.0	0.0	6.0	3.0	7.0	0.0	0.0	k__Bacteria; p__Firmicutes; c__Clostridia; o__Clostridiales; f__Unclassified_Clostridiales; g__Unclassified_Clostridiales; s__Unclassified_Clostridiales
otu3489	0.0	0.0	0.0	0.0	16.0	0.0	0.0	0.0	k__Bacteria; p__Proteobacteria; c__Gammaproteobacteria; o__Enterobacteriales; f__Enterobacteriaceae; g__Unclassified_Enterobacteriaceae; s__Unclassified_Enterobacteriaceae
otu3552	0.0	0.0	0.0	0.0	8.0	0.0	7.0	1.0	k__Bacteria; p__Firmicutes; c__Bacilli; o__Lactobacillales; f__Enterococcaceae; g__Enterococcus; s__Unclassified_Enterococcus
otu3744	0.0	0.0	0.0	8.0	8.0	0.0	0.0	0.0	k__Bacteria; p__Firmicutes; c__Clostridia; o__Clostridiales; f__Ruminococcaceae; g__Oscillospira; s__Unclassified_Oscillospira
otu3891	14.0	0.0	0.0	2.0	0.0	0.0	0.0	0.0	k__Bacteria; p__Firmicutes; c__Clostridia; o__Clostridiales; f__Lachnospiraceae; g__Unclassified_Lachnospiraceae; s__Unclassified_Lachnospiraceae
otu3994	11.0	0.0	0.0	0.0	0.0	5.0	0.0	0.0	k__Bacteria; p__Proteobacteria; c__Alphaproteobacteria; o__Rhodobacterales; f__Rhodobacteraceae; g__Paracoccus; s__Unclassified_Paracoccus
otu4172	7.0	9.0	0.0	0.0	0.0	0.0	0.0	0.0	k__Bacteria; p__Firmicutes; c__Clostridia; o__Clostridiales; f__Lachnospiraceae; g__Dorea; s__Unclassified_Dorea
otu4748	1.0	10.0	0.0	1.0	0.0	4.0	0.0	0.0	k__Bacteria; p__Firmicutes; c__Bacilli; o__Lactobacillales; f__Streptococcaceae; g__Streptococcus; s__Unclassified_Streptococcus
otu4829	0.0	0.0	0.0	0.0	16.0	0.0	0.0	0.0	k__Bacteria; p__Firmicutes; c__Clostridia; o__Clostridiales; f__Ruminococcaceae; g__Unclassified_Ruminococcaceae; s__Unclassified_Ruminococcaceae
otu4888	0.0	0.0	0.0	0.0	16.0	0.0	0.0	0.0	k__Bacteria; p__Proteobacteria; c__Gammaproteobacteria; o__Enterobacteriales; f__Enterobacteriaceae; g__Unclassified_Enterobacteriaceae; s__Unclassified_Enterobacteriaceae
otu5304	10.0	3.0	0.0	0.0	0.0	0.0	2.0	1.0	k__Bacteria; p__Proteobacteria; c__Gammaproteobacteria; o__Pseudomonadales; f__Moraxellaceae; g__Acinetobacter; s__Unclassified_Acinetobacter
otu5305	0.0	0.0	0.0	0.0	16.0	0.0	0.0	0.0	k__Bacteria; p__Proteobacteria; c__Gammaproteobacteria; o__Enterobacteriales; f__Enterobacteriaceae; g__Unclassified_Enterobacteriaceae; s__Unclassified_Enterobacteriaceae
otu5378	0.0	0.0	0.0	16.0	0.0	0.0	0.0	0.0	k__Bacteria; p__Firmicutes; c__Clostridia; o__Clostridiales; f__Lachnospiraceae; g__Unclassified_Lachnospiraceae; s__Unclassified_Lachnospiraceae
otu5381	16.0	0.0	0.0	0.0	0.0	0.0	0.0	0.0	k__Bacteria; p__Firmicutes; c__Clostridia; o__Clostridiales; f__Unclassified_Clostridiales; g__Unclassified_Clostridiales; s__Unclassified_Clostridiales
otu5487	0.0	16.0	0.0	0.0	0.0	0.0	0.0	0.0	k__Bacteria; p__Firmicutes; c__Clostridia; o__Clostridiales; f__Ruminococcaceae; g__Ruminococcus; s__Unclassified_Ruminococcus
otu5536	0.0	11.0	0.0	4.0	0.0	1.0	0.0	0.0	k__Bacteria; p__Bacteroidetes; c__Bacteroidia; o__Bacteroidales; f__Bacteroidaceae; g__Bacteroides; s__Unclassified_Bacteroides
otu5658	0.0	0.0	0.0	0.0	0.0	16.0	0.0	0.0	k__Bacteria; p__Bacteroidetes; c__Bacteroidia; o__Bacteroidales; f__Bacteroidaceae; g__Bacteroides; s__Bacteroides_eggerthii
otu5786	16.0	0.0	0.0	0.0	0.0	0.0	0.0	0.0	k__Bacteria; p__Proteobacteria; c__Deltaproteobacteria; o__GMD14H09; f__Unclassified_GMD14H09; g__Unclassified_GMD14H09; s__Unclassified_GMD14H09
otu5870	13.0	3.0	0.0	0.0	0.0	0.0	0.0	0.0	k__Bacteria; p__Firmicutes; c__Clostridia; o__Clostridiales; f__Ruminococcaceae; g__Unclassified_Ruminococcaceae; s__Unclassified_Ruminococcaceae
otu5925	0.0	16.0	0.0	0.0	0.0	0.0	0.0	0.0	k__Bacteria; p__Firmicutes; c__Clostridia; o__Clostridiales; f__[Mogibacteriaceae]; g__Unclassified_[Mogibacteriaceae]; s__Unclassified_[Mogibacteriaceae]
otu6210	0.0	16.0	0.0	0.0	0.0	0.0	0.0	0.0	k__Bacteria; p__Firmicutes; c__Bacilli; o__Lactobacillales; f__Lactobacillaceae; g__Lactobacillus; s__Unclassified_Lactobacillus
otu6249	11.0	5.0	0.0	0.0	0.0	0.0	0.0	0.0	k__Bacteria; p__Firmicutes; c__Bacilli; o__Lactobacillales; f__Lactobacillaceae; g__Lactobacillus; s__Unclassified_Lactobacillus
otu6299	6.0	10.0	0.0	0.0	0.0	0.0	0.0	0.0	k__Bacteria; p__Firmicutes; c__Clostridia; o__Clostridiales; f__Lachnospiraceae; g__Unclassified_Lachnospiraceae; s__Unclassified_Lachnospiraceae
otu6771	16.0	0.0	0.0	0.0	0.0	0.0	0.0	0.0	k__Bacteria; p__Firmicutes; c__Clostridia; o__Clostridiales; f__Ruminococcaceae; g__Unclassified_Ruminococcaceae; s__Unclassified_Ruminococcaceae
otu6815	4.0	8.0	4.0	0.0	0.0	0.0	0.0	0.0	k__Bacteria; p__Bacteroidetes; c__Sphingobacteriia; o__Sphingobacteriales; f__Sphingobacteriaceae; g__Sphingobacterium; s__Sphingobacterium_multivorum
otu6864	7.0	0.0	0.0	3.0	0.0	0.0	6.0	0.0	k__Bacteria; p__Firmicutes; c__Clostridia; o__Clostridiales; f__Ruminococcaceae; g__Unclassified_Ruminococcaceae; s__Unclassified_Ruminococcaceae
otu7376	0.0	0.0	0.0	16.0	0.0	0.0	0.0	0.0	k__Bacteria; p__Firmicutes; c__Clostridia; o__Clostridiales; f__Unclassified_Clostridiales; g__Unclassified_Clostridiales; s__Unclassified_Clostridiales
otu7515	0.0	0.0	0.0	0.0	0.0	16.0	0.0	0.0	k__Bacteria; p__Firmicutes; c__Clostridia; o__Clostridiales; f__Ruminococcaceae; g__Ruminococcus; s__Unclassified_Ruminococcus
otu7689	0.0	0.0	0.0	15.0	0.0	0.0	1.0	0.0	k__Bacteria; p__Firmicutes; c__Clostridia; o__Clostridiales; f__Lachnospiraceae; g__Unclassified_Lachnospiraceae; s__Unclassified_Lachnospiraceae
otu63	1.0	14.0	0.0	0.0	0.0	0.0	0.0	0.0	k__Bacteria; p__Firmicutes; c__Bacilli; o__Lactobacillales; f__Lactobacillaceae; g__Lactobacillus; s__Unclassified_Lactobacillus
otu125	0.0	0.0	0.0	5.0	7.0	1.0	0.0	2.0	k__Bacteria; p__Firmicutes; c__Clostridia; o__Clostridiales; f__Ruminococcaceae; g__Unclassified_Ruminococcaceae; s__Unclassified_Ruminococcaceae
otu318	8.0	6.0	0.0	0.0	0.0	1.0	0.0	0.0	k__Bacteria; p__Firmicutes; c__Clostridia; o__Clostridiales; f__Ruminococcaceae; g__Unclassified_Ruminococcaceae; s__Unclassified_Ruminococcaceae
otu325	0.0	0.0	0.0	0.0	0.0	15.0	0.0	0.0	k__Bacteria; p__Bacteroidetes; c__Bacteroidia; o__Bacteroidales; f__Bacteroidaceae; g__Bacteroides; s__Unclassified_Bacteroides
otu454	0.0	0.0	0.0	0.0	15.0	0.0	0.0	0.0	k__Bacteria; p__Proteobacteria; c__Gammaproteobacteria; o__Enterobacteriales; f__Enterobacteriaceae; g__Unclassified_Enterobacteriaceae; s__Unclassified_Enterobacteriaceae
otu638	0.0	0.0	0.0	15.0	0.0	0.0	0.0	0.0	k__Bacteria; p__Bacteroidetes; c__Bacteroidia; o__Bacteroidales; f__Bacteroidaceae; g__Bacteroides; s__Unclassified_Bacteroides
otu819	15.0	0.0	0.0	0.0	0.0	0.0	0.0	0.0	k__Bacteria; p__Bacteroidetes; c__Flavobacteriia; o__Flavobacteriales; f__Flavobacteriaceae; g__Sediminicola; s__Unclassified_Sediminicola
otu1060	0.0	0.0	0.0	15.0	0.0	0.0	0.0	0.0	k__Bacteria; p__Firmicutes; c__Clostridia; o__Clostridiales; f__Veillonellaceae; g__Megamonas; s__Unclassified_Megamonas
otu1199	0.0	15.0	0.0	0.0	0.0	0.0	0.0	0.0	k__Bacteria; p__Firmicutes; c__Bacilli; o__Lactobacillales; f__Lactobacillaceae; g__Lactobacillus; s__Unclassified_Lactobacillus
otu1316	0.0	0.0	0.0	0.0	15.0	0.0	0.0	0.0	k__Bacteria; p__Firmicutes; c__Clostridia; o__Clostridiales; f__Lachnospiraceae; g__Robinsoniella; s__Robinsoniella_peoriensis
otu1367	1.0	0.0	0.0	0.0	0.0	4.0	10.0	0.0	k__Bacteria; p__Proteobacteria; c__Gammaproteobacteria; o__Enterobacteriales; f__Enterobacteriaceae; g__Unclassified_Enterobacteriaceae; s__Unclassified_Enterobacteriaceae
otu1778	0.0	0.0	0.0	11.0	0.0	4.0	0.0	0.0	k__Bacteria; p__Firmicutes; c__Clostridia; o__Clostridiales; f__Lachnospiraceae; g__[Ruminococcus]; s__[Ruminococcus]_torques
otu2182	12.0	0.0	0.0	0.0	0.0	3.0	0.0	0.0	k__Bacteria; p__Firmicutes; c__Clostridia; o__Clostridiales; f__Ruminococcaceae; g__Ruminococcus; s__Unclassified_Ruminococcus
otu2221	0.0	7.0	4.0	1.0	1.0	0.0	0.0	2.0	k__Bacteria; p__Proteobacteria; c__Deltaproteobacteria; o__Desulfovibrionales; f__Desulfovibrionaceae; g__Unclassified_Desulfovibrionaceae; s__Unclassified_Desulfovibrionaceae
otu2262	6.0	9.0	0.0	0.0	0.0	0.0	0.0	0.0	k__Bacteria; p__Firmicutes; c__Bacilli; o__Lactobacillales; f__Lactobacillaceae; g__Lactobacillus; s__Unclassified_Lactobacillus
otu2538	0.0	15.0	0.0	0.0	0.0	0.0	0.0	0.0	k__Bacteria; p__Firmicutes; c__Clostridia; o__Clostridiales; f__Lachnospiraceae; g__Blautia; s__Blautia_producta
otu2555	0.0	0.0	0.0	0.0	0.0	1.0	14.0	0.0	k__Bacteria; p__Proteobacteria; c__Gammaproteobacteria; o__Enterobacteriales; f__Enterobacteriaceae; g__Unclassified_Enterobacteriaceae; s__Unclassified_Enterobacteriaceae
otu2795	12.0	3.0	0.0	0.0	0.0	0.0	0.0	0.0	k__Bacteria; p__Proteobacteria; c__Alphaproteobacteria; o__Sphingomonadales; f__Sphingomonadaceae; g__Novosphingobium; s__Unclassified_Novosphingobium
otu2877	0.0	0.0	13.0	0.0	0.0	0.0	0.0	2.0	k__Bacteria; p__Proteobacteria; c__Betaproteobacteria; o__Burkholderiales; f__Oxalobacteraceae; g__Unclassified_Oxalobacteraceae; s__Unclassified_Oxalobacteraceae
otu3633	15.0	0.0	0.0	0.0	0.0	0.0	0.0	0.0	k__Bacteria; p__Firmicutes; c__Clostridia; o__Clostridiales; f__Unclassified_Clostridiales; g__Unclassified_Clostridiales; s__Unclassified_Clostridiales
otu3955	0.0	0.0	0.0	14.0	0.0	0.0	1.0	0.0	k__Bacteria; p__Firmicutes; c__Clostridia; o__Clostridiales; f__Lachnospiraceae; g__Unclassified_Lachnospiraceae; s__Unclassified_Lachnospiraceae
otu4160	8.0	7.0	0.0	0.0	0.0	0.0	0.0	0.0	k__Bacteria; p__Proteobacteria; c__Gammaproteobacteria; o__Xanthomonadales; f__Xanthomonadaceae; g__Stenotrophomonas; s__Unclassified_Stenotrophomonas
otu4358	0.0	15.0	0.0	0.0	0.0	0.0	0.0	0.0	k__Bacteria; p__Firmicutes; c__Clostridia; o__Clostridiales; f__Unclassified_Clostridiales; g__Unclassified_Clostridiales; s__Unclassified_Clostridiales
otu4454	0.0	13.0	0.0	0.0	0.0	0.0	2.0	0.0	k__Bacteria; p__Firmicutes; c__Clostridia; o__Clostridiales; f__Unclassified_Clostridiales; g__Unclassified_Clostridiales; s__Unclassified_Clostridiales
otu4721	7.0	7.0	1.0	0.0	0.0	0.0	0.0	0.0	k__Bacteria; p__Firmicutes; c__Bacilli; o__Bacillales; f__Bacillaceae; g__Bacillus; s__Unclassified_Bacillus
otu4826	0.0	0.0	0.0	0.0	0.0	0.0	15.0	0.0	k__Bacteria; p__Firmicutes; c__Clostridia; o__Clostridiales; f__Veillonellaceae; g__Veillonella; s__Veillonella_dispar
otu4865	0.0	10.0	1.0	0.0	0.0	3.0	1.0	0.0	k__Bacteria; p__Firmicutes; c__Clostridia; o__Clostridiales; f__Lachnospiraceae; g__[Ruminococcus]; s__[Ruminococcus]_gnavus
otu5139	0.0	0.0	0.0	0.0	15.0	0.0	0.0	0.0	k__Bacteria; p__Proteobacteria; c__Gammaproteobacteria; o__Enterobacteriales; f__Enterobacteriaceae; g__Unclassified_Enterobacteriaceae; s__Unclassified_Enterobacteriaceae
otu5344	0.0	0.0	0.0	1.0	14.0	0.0	0.0	0.0	k__Bacteria; p__Firmicutes; c__Clostridia; o__Clostridiales; f__Ruminococcaceae; g__Oscillospira; s__Unclassified_Oscillospira
otu5466	0.0	15.0	0.0	0.0	0.0	0.0	0.0	0.0	k__Bacteria; p__Firmicutes; c__Bacilli; o__Lactobacillales; f__Lactobacillaceae; g__Lactobacillus; s__Unclassified_Lactobacillus
otu5784	13.0	2.0	0.0	0.0	0.0	0.0	0.0	0.0	k__Bacteria; p__Bacteroidetes; c__[Saprospirae]; o__[Saprospirales]; f__Chitinophagaceae; g__Sediminibacterium; s__Unclassified_Sediminibacterium
otu5803	0.0	15.0	0.0	0.0	0.0	0.0	0.0	0.0	k__Bacteria; p__Firmicutes; c__Clostridia; o__Clostridiales; f__[Mogibacteriaceae]; g__Unclassified_[Mogibacteriaceae]; s__Unclassified_[Mogibacteriaceae]
otu5819	4.0	11.0	0.0	0.0	0.0	0.0	0.0	0.0	k__Bacteria; p__Firmicutes; c__Bacilli; o__Lactobacillales; f__Lactobacillaceae; g__Lactobacillus; s__Unclassified_Lactobacillus
otu6122	0.0	0.0	0.0	5.0	0.0	6.0	0.0	4.0	k__Bacteria; p__Bacteroidetes; c__Bacteroidia; o__Bacteroidales; f__Bacteroidaceae; g__Bacteroides; s__Unclassified_Bacteroides
otu6345	0.0	0.0	1.0	0.0	0.0	0.0	0.0	14.0	k__Bacteria; p__Proteobacteria; c__Betaproteobacteria; o__Burkholderiales; f__Oxalobacteraceae; g__Herbaspirillum; s__Unclassified_Herbaspirillum
otu6887	12.0	2.0	1.0	0.0	0.0	0.0	0.0	0.0	k__Bacteria; p__Firmicutes; c__Erysipelotrichi; o__Erysipelotrichales; f__Erysipelotrichaceae; g__Unclassified_Erysipelotrichaceae; s__Unclassified_Erysipelotrichaceae
otu7120	15.0	0.0	0.0	0.0	0.0	0.0	0.0	0.0	k__Bacteria; p__Proteobacteria; c__Gammaproteobacteria; o__Pseudomonadales; f__Moraxellaceae; g__Unclassified_Moraxellaceae; s__Unclassified_Moraxellaceae
otu7121	0.0	15.0	0.0	0.0	0.0	0.0	0.0	0.0	k__Bacteria; p__Bacteroidetes; c__Bacteroidia; o__Bacteroidales; f__S24-7; g__Unclassified_S24-7; s__Unclassified_S24-7
otu7197	0.0	0.0	0.0	0.0	4.0	0.0	11.0	0.0	k__Bacteria; p__Firmicutes; c__Bacilli; o__Lactobacillales; f__Enterococcaceae; g__Enterococcus; s__Unclassified_Enterococcus
otu7418	0.0	15.0	0.0	0.0	0.0	0.0	0.0	0.0	k__Bacteria; p__Firmicutes; c__Bacilli; o__Lactobacillales; f__Lactobacillaceae; g__Lactobacillus; s__Unclassified_Lactobacillus
otu7428	0.0	0.0	0.0	0.0	0.0	15.0	0.0	0.0	k__Bacteria; p__Proteobacteria; c__Gammaproteobacteria; o__Pseudomonadales; f__Moraxellaceae; g__Enhydrobacter; s__Unclassified_Enhydrobacter
otu23	1.0	13.0	0.0	0.0	0.0	0.0	0.0	0.0	k__Bacteria; p__Firmicutes; c__Bacilli; o__Lactobacillales; f__Unclassified_Lactobacillales; g__Unclassified_Lactobacillales; s__Unclassified_Lactobacillales
otu79	9.0	5.0	0.0	0.0	0.0	0.0	0.0	0.0	k__Bacteria; p__Firmicutes; c__Clostridia; o__Clostridiales; f__Ruminococcaceae; g__Unclassified_Ruminococcaceae; s__Unclassified_Ruminococcaceae
otu333	0.0	0.0	1.0	3.0	7.0	0.0	0.0	3.0	k__Bacteria; p__Firmicutes; c__Erysipelotrichi; o__Erysipelotrichales; f__Erysipelotrichaceae; g__[Eubacterium]; s__[Eubacterium]_dolichum
otu335	8.0	6.0	0.0	0.0	0.0	0.0	0.0	0.0	k__Bacteria; p__Tenericutes; c__Mollicutes; o__Entomoplasmatales; f__Unclassified_Entomoplasmatales; g__Unclassified_Entomoplasmatales; s__Unclassified_Entomoplasmatales
otu361	0.0	0.0	0.0	14.0	0.0	0.0	0.0	0.0	k__Bacteria; p__Firmicutes; c__Clostridia; o__Clostridiales; f__Ruminococcaceae; g__Unclassified_Ruminococcaceae; s__Unclassified_Ruminococcaceae
otu446	0.0	0.0	0.0	0.0	9.0	0.0	3.0	2.0	k__Bacteria; p__Firmicutes; c__Clostridia; o__Clostridiales; f__Ruminococcaceae; g__Unclassified_Ruminococcaceae; s__Unclassified_Ruminococcaceae
otu871	0.0	0.0	0.0	8.0	3.0	0.0	0.0	3.0	k__Bacteria; p__Firmicutes; c__Erysipelotrichi; o__Erysipelotrichales; f__Erysipelotrichaceae; g__[Eubacterium]; s__[Eubacterium]_dolichum
otu889	2.0	0.0	0.0	0.0	0.0	9.0	0.0	3.0	k__Bacteria; p__Bacteroidetes; c__Bacteroidia; o__Bacteroidales; f__Bacteroidaceae; g__Bacteroides; s__Unclassified_Bacteroides
otu929	0.0	0.0	0.0	0.0	14.0	0.0	0.0	0.0	k__Bacteria; p__Proteobacteria; c__Gammaproteobacteria; o__Enterobacteriales; f__Enterobacteriaceae; g__Unclassified_Enterobacteriaceae; s__Unclassified_Enterobacteriaceae
otu1204	12.0	2.0	0.0	0.0	0.0	0.0	0.0	0.0	k__Bacteria; p__Bacteroidetes; c__[Saprospirae]; o__[Saprospirales]; f__Chitinophagaceae; g__Sediminibacterium; s__Unclassified_Sediminibacterium
otu1276	0.0	0.0	0.0	0.0	0.0	0.0	2.0	12.0	k__Bacteria; p__Firmicutes; c__Bacilli; o__Lactobacillales; f__Enterococcaceae; g__Enterococcus; s__Unclassified_Enterococcus
otu1320	0.0	0.0	0.0	13.0	0.0	1.0	0.0	0.0	k__Bacteria; p__Firmicutes; c__Clostridia; o__Clostridiales; f__Lachnospiraceae; g__Unclassified_Lachnospiraceae; s__Unclassified_Lachnospiraceae
otu1607	7.0	2.0	3.0	0.0	0.0	0.0	0.0	2.0	k__Bacteria; p__Proteobacteria; c__Betaproteobacteria; o__Burkholderiales; f__Comamonadaceae; g__Unclassified_Comamonadaceae; s__Unclassified_Comamonadaceae
otu1613	0.0	5.0	0.0	9.0	0.0	0.0	0.0	0.0	k__Bacteria; p__Actinobacteria; c__Coriobacteriia; o__Coriobacteriales; f__Coriobacteriaceae; g__Collinsella; s__Unclassified_Collinsella
otu1685	12.0	2.0	0.0	0.0	0.0	0.0	0.0	0.0	k__Bacteria; p__Firmicutes; c__Bacilli; o__Lactobacillales; f__Lactobacillaceae; g__Lactobacillus; s__Unclassified_Lactobacillus
otu1841	0.0	14.0	0.0	0.0	0.0	0.0	0.0	0.0	k__Bacteria; p__Firmicutes; c__Clostridia; o__Clostridiales; f__Clostridiaceae; g__02d06; s__Unclassified_02d06
otu1850	1.0	1.0	2.0	5.0	0.0	1.0	4.0	0.0	k__Bacteria; p__Bacteroidetes; c__Bacteroidia; o__Bacteroidales; f__Bacteroidaceae; g__Bacteroides; s__Unclassified_Bacteroides
otu1853	2.0	12.0	0.0	0.0	0.0	0.0	0.0	0.0	k__Bacteria; p__Armatimonadetes; c__[Fimbriimonadia]; o__[Fimbriimonadales]; f__[Fimbriimonadaceae]; g__Fimbriimonas; s__Unclassified_Fimbriimonas
otu1991	3.0	8.0	0.0	0.0	0.0	3.0	0.0	0.0	k__Bacteria; p__Actinobacteria; c__Actinobacteria; o__Actinomycetales; f__Corynebacteriaceae; g__Corynebacterium; s__Unclassified_Corynebacterium
otu2030	11.0	3.0	0.0	0.0	0.0	0.0	0.0	0.0	k__Bacteria; p__Firmicutes; c__Bacilli; o__Bacillales; f__Bacillaceae; g__Bacillus; s__Unclassified_Bacillus
otu2177	0.0	8.0	0.0	5.0	0.0	1.0	0.0	0.0	k__Bacteria; p__Firmicutes; c__Bacilli; o__Lactobacillales; f__Streptococcaceae; g__Streptococcus; s__Unclassified_Streptococcus
otu2259	12.0	2.0	0.0	0.0	0.0	0.0	0.0	0.0	k__Bacteria; p__Proteobacteria; c__Alphaproteobacteria; o__Rhizobiales; f__Methylobacteriaceae; g__Methylobacterium; s__Methylobacterium_adhaesivum
otu2763	9.0	5.0	0.0	0.0	0.0	0.0	0.0	0.0	k__Bacteria; p__Bacteroidetes; c__Bacteroidia; o__Bacteroidales; f__Prevotellaceae; g__Prevotella; s__Prevotella_copri
otu2921	0.0	0.0	0.0	0.0	14.0	0.0	0.0	0.0	k__Bacteria; p__Bacteroidetes; c__Bacteroidia; o__Bacteroidales; f__Bacteroidaceae; g__Bacteroides; s__Bacteroides_ovatus
otu3074	0.0	0.0	0.0	12.0	0.0	2.0	0.0	0.0	k__Bacteria; p__Bacteroidetes; c__Bacteroidia; o__Bacteroidales; f__Bacteroidaceae; g__Bacteroides; s__Unclassified_Bacteroides
otu3238	0.0	0.0	0.0	2.0	12.0	0.0	0.0	0.0	k__Bacteria; p__Bacteroidetes; c__Bacteroidia; o__Bacteroidales; f__Bacteroidaceae; g__Bacteroides; s__Unclassified_Bacteroides
otu3437	0.0	14.0	0.0	0.0	0.0	0.0	0.0	0.0	k__Bacteria; p__Firmicutes; c__Clostridia; o__Clostridiales; f__Unclassified_Clostridiales; g__Unclassified_Clostridiales; s__Unclassified_Clostridiales
otu3514	0.0	0.0	0.0	5.0	0.0	9.0	0.0	0.0	k__Bacteria; p__Firmicutes; c__Clostridia; o__Clostridiales; f__Ruminococcaceae; g__Ruminococcus; s__Unclassified_Ruminococcus
otu3805	0.0	14.0	0.0	0.0	0.0	0.0	0.0	0.0	k__Bacteria; p__Firmicutes; c__Clostridia; o__Clostridiales; f__Lachnospiraceae; g__Unclassified_Lachnospiraceae; s__Unclassified_Lachnospiraceae
otu3868	5.0	9.0	0.0	0.0	0.0	0.0	0.0	0.0	k__Bacteria; p__Firmicutes; c__Clostridia; o__Clostridiales; f__Lachnospiraceae; g__Blautia; s__Blautia_producta
otu4039	14.0	0.0	0.0	0.0	0.0	0.0	0.0	0.0	k__Bacteria; p__Proteobacteria; c__Alphaproteobacteria; o__Sphingomonadales; f__Sphingomonadaceae; g__Novosphingobium; s__Unclassified_Novosphingobium
otu4314	0.0	14.0	0.0	0.0	0.0	0.0	0.0	0.0	k__Bacteria; p__Firmicutes; c__Clostridia; o__Clostridiales; f__Ruminococcaceae; g__Unclassified_Ruminococcaceae; s__Unclassified_Ruminococcaceae
otu4444	14.0	0.0	0.0	0.0	0.0	0.0	0.0	0.0	k__Bacteria; p__Actinobacteria; c__Actinobacteria; o__Actinomycetales; f__Jonesiaceae; g__Jonesia; s__Unclassified_Jonesia
otu4646	0.0	2.0	0.0	0.0	0.0	4.0	8.0	0.0	k__Bacteria; p__Proteobacteria; c__Gammaproteobacteria; o__Enterobacteriales; f__Enterobacteriaceae; g__Unclassified_Enterobacteriaceae; s__Unclassified_Enterobacteriaceae
otu4935	0.0	1.0	3.0	0.0	0.0	1.0	1.0	8.0	k__Bacteria; p__Firmicutes; c__Bacilli; o__Lactobacillales; f__Aerococcaceae; g__Unclassified_Aerococcaceae; s__Unclassified_Aerococcaceae
otu5170	7.0	7.0	0.0	0.0	0.0	0.0	0.0	0.0	k__Bacteria; p__Cyanobacteria; c__Chloroplast; o__Streptophyta; f__Unclassified_Streptophyta; g__Unclassified_Streptophyta; s__Unclassified_Streptophyta
otu5208	8.0	6.0	0.0	0.0	0.0	0.0	0.0	0.0	k__Bacteria; p__Firmicutes; c__Clostridia; o__Clostridiales; f__Unclassified_Clostridiales; g__Unclassified_Clostridiales; s__Unclassified_Clostridiales
otu5607	1.0	0.0	0.0	5.0	0.0	1.0	7.0	0.0	k__Bacteria; p__Bacteroidetes; c__Bacteroidia; o__Bacteroidales; f__Bacteroidaceae; g__Bacteroides; s__Unclassified_Bacteroides
otu5643	0.0	0.0	0.0	0.0	0.0	1.0	13.0	0.0	k__Bacteria; p__Proteobacteria; c__Gammaproteobacteria; o__Enterobacteriales; f__Enterobacteriaceae; g__Unclassified_Enterobacteriaceae; s__Unclassified_Enterobacteriaceae
otu5733	0.0	0.0	0.0	14.0	0.0	0.0	0.0	0.0	k__Bacteria; p__Bacteroidetes; c__Bacteroidia; o__Bacteroidales; f__Bacteroidaceae; g__Bacteroides; s__Unclassified_Bacteroides
otu5835	10.0	4.0	0.0	0.0	0.0	0.0	0.0	0.0	k__Bacteria; p__[Thermi]; c__Deinococci; o__Deinococcales; f__Trueperaceae; g__B-42; s__Unclassified_B-42
otu5844	0.0	14.0	0.0	0.0	0.0	0.0	0.0	0.0	k__Bacteria; p__Proteobacteria; c__Betaproteobacteria; o__Burkholderiales; f__Comamonadaceae; g__Unclassified_Comamonadaceae; s__Unclassified_Comamonadaceae
otu6006	0.0	14.0	0.0	0.0	0.0	0.0	0.0	0.0	k__Bacteria; p__Proteobacteria; c__Betaproteobacteria; o__Burkholderiales; f__Comamonadaceae; g__Hydrogenophaga; s__Unclassified_Hydrogenophaga
otu6656	0.0	14.0	0.0	0.0	0.0	0.0	0.0	0.0	k__Bacteria; p__Bacteroidetes; c__Bacteroidia; o__Bacteroidales; f__S24-7; g__Unclassified_S24-7; s__Unclassified_S24-7
otu6698	0.0	14.0	0.0	0.0	0.0	0.0	0.0	0.0	k__Bacteria; p__Proteobacteria; c__Gammaproteobacteria; o__Xanthomonadales; f__Xanthomonadaceae; g__Stenotrophomonas; s__Unclassified_Stenotrophomonas
otu7544	0.0	0.0	0.0	0.0	0.0	14.0	0.0	0.0	k__Bacteria; p__Firmicutes; c__Clostridia; o__Clostridiales; f__Lachnospiraceae; g__Unclassified_Lachnospiraceae; s__Unclassified_Lachnospiraceae
otu7680	8.0	6.0	0.0	0.0	0.0	0.0	0.0	0.0	k__Bacteria; p__Firmicutes; c__Clostridia; o__Clostridiales; f__Unclassified_Clostridiales; g__Unclassified_Clostridiales; s__Unclassified_Clostridiales
otu7758	0.0	0.0	0.0	10.0	0.0	4.0	0.0	0.0	k__Bacteria; p__Bacteroidetes; c__Bacteroidia; o__Bacteroidales; f__Bacteroidaceae; g__Bacteroides; s__Unclassified_Bacteroides
otu38	0.0	13.0	0.0	0.0	0.0	0.0	0.0	0.0	k__Bacteria; p__Firmicutes; c__Bacilli; o__Lactobacillales; f__Lactobacillaceae; g__Lactobacillus; s__Unclassified_Lactobacillus
otu467	1.0	12.0	0.0	0.0	0.0	0.0	0.0	0.0	k__Bacteria; p__Firmicutes; c__Bacilli; o__Lactobacillales; f__Lactobacillaceae; g__Lactobacillus; s__Unclassified_Lactobacillus
otu482	3.0	1.0	0.0	6.0	0.0	1.0	2.0	0.0	k__Bacteria; p__Bacteroidetes; c__Bacteroidia; o__Bacteroidales; f__Bacteroidaceae; g__Bacteroides; s__Unclassified_Bacteroides
otu770	0.0	13.0	0.0	0.0	0.0	0.0	0.0	0.0	k__Bacteria; p__Firmicutes; c__Bacilli; o__Lactobacillales; f__Streptococcaceae; g__Streptococcus; s__Unclassified_Streptococcus
otu784	4.0	9.0	0.0	0.0	0.0	0.0	0.0	0.0	k__Bacteria; p__Firmicutes; c__Clostridia; o__Clostridiales; f__Ruminococcaceae; g__Unclassified_Ruminococcaceae; s__Unclassified_Ruminococcaceae
otu891	0.0	0.0	0.0	0.0	0.0	13.0	0.0	0.0	k__Bacteria; p__Proteobacteria; c__Gammaproteobacteria; o__Enterobacteriales; f__Enterobacteriaceae; g__Erwinia; s__Unclassified_Erwinia
otu1118	0.0	0.0	0.0	0.0	0.0	13.0	0.0	0.0	k__Bacteria; p__Firmicutes; c__Clostridia; o__Clostridiales; f__Veillonellaceae; g__Dialister; s__Unclassified_Dialister
otu1140	0.0	0.0	0.0	13.0	0.0	0.0	0.0	0.0	k__Bacteria; p__Firmicutes; c__Clostridia; o__Clostridiales; f__Lachnospiraceae; g__[Ruminococcus]; s__[Ruminococcus]_gnavus
otu1150	0.0	0.0	0.0	0.0	13.0	0.0	0.0	0.0	k__Bacteria; p__Proteobacteria; c__Gammaproteobacteria; o__Enterobacteriales; f__Enterobacteriaceae; g__Unclassified_Enterobacteriaceae; s__Unclassified_Enterobacteriaceae
otu1418	1.0	5.0	0.0	0.0	0.0	7.0	0.0	0.0	k__Bacteria; p__Firmicutes; c__Clostridia; o__Clostridiales; f__Lachnospiraceae; g__[Ruminococcus]; s__Unclassified_[Ruminococcus]
otu1678	11.0	2.0	0.0	0.0	0.0	0.0	0.0	0.0	k__Bacteria; p__Bacteroidetes; c__Bacteroidia; o__Bacteroidales; f__Bacteroidaceae; g__Bacteroides; s__Unclassified_Bacteroides
otu1963	1.0	12.0	0.0	0.0	0.0	0.0	0.0	0.0	k__Bacteria; p__Firmicutes; c__Bacilli; o__Lactobacillales; f__Lactobacillaceae; g__Lactobacillus; s__Unclassified_Lactobacillus
otu2027	12.0	0.0	0.0	0.0	1.0	0.0	0.0	0.0	k__Bacteria; p__Bacteroidetes; c__Bacteroidia; o__Bacteroidales; f__Bacteroidaceae; g__Bacteroides; s__Unclassified_Bacteroides
otu2120	13.0	0.0	0.0	0.0	0.0	0.0	0.0	0.0	k__Bacteria; p__Actinobacteria; c__MB-A2-108; o__0319-7L14; f__Unclassified_0319-7L14; g__Unclassified_0319-7L14; s__Unclassified_0319-7L14
otu2140	7.0	6.0	0.0	0.0	0.0	0.0	0.0	0.0	k__Bacteria; p__Bacteroidetes; c__[Saprospirae]; o__[Saprospirales]; f__Chitinophagaceae; g__Unclassified_Chitinophagaceae; s__Unclassified_Chitinophagaceae
otu2279	0.0	13.0	0.0	0.0	0.0	0.0	0.0	0.0	k__Bacteria; p__Firmicutes; c__Bacilli; o__Lactobacillales; f__Lactobacillaceae; g__Lactobacillus; s__Unclassified_Lactobacillus
otu2513	13.0	0.0	0.0	0.0	0.0	0.0	0.0	0.0	k__Bacteria; p__Firmicutes; c__Bacilli; o__Bacillales; f__Bacillaceae; g__Bacillus; s__Bacillus_humi
otu2601	0.0	0.0	0.0	4.0	0.0	0.0	9.0	0.0	k__Bacteria; p__Firmicutes; c__Erysipelotrichi; o__Erysipelotrichales; f__Erysipelotrichaceae; g__Unclassified_Erysipelotrichaceae; s__Unclassified_Erysipelotrichaceae
otu2680	0.0	0.0	4.0	0.0	0.0	0.0	9.0	0.0	k__Bacteria; p__Firmicutes; c__Bacilli; o__Lactobacillales; f__Enterococcaceae; g__Enterococcus; s__Unclassified_Enterococcus
otu2737	10.0	2.0	0.0	0.0	0.0	0.0	1.0	0.0	k__Bacteria; p__Proteobacteria; c__Gammaproteobacteria; o__Pseudomonadales; f__Moraxellaceae; g__Acinetobacter; s__Unclassified_Acinetobacter
otu2751	0.0	13.0	0.0	0.0	0.0	0.0	0.0	0.0	k__Bacteria; p__Firmicutes; c__Clostridia; o__Clostridiales; f__Unclassified_Clostridiales; g__Unclassified_Clostridiales; s__Unclassified_Clostridiales
otu2793	0.0	0.0	0.0	6.0	0.0	0.0	5.0	2.0	k__Bacteria; p__Firmicutes; c__Clostridia; o__Clostridiales; f__Lachnospiraceae; g__[Ruminococcus]; s__[Ruminococcus]_gnavus
otu2995	0.0	0.0	0.0	0.0	1.0	0.0	11.0	1.0	k__Bacteria; p__Firmicutes; c__Clostridia; o__Clostridiales; f__Peptostreptococcaceae; g__[Clostridium]; s__[Clostridium]_difficile
otu3052	0.0	13.0	0.0	0.0	0.0	0.0	0.0	0.0	k__Bacteria; p__Bacteroidetes; c__Bacteroidia; o__Bacteroidales; f__Rikenellaceae; g__Unclassified_Rikenellaceae; s__Unclassified_Rikenellaceae
otu3083	0.0	0.0	0.0	0.0	0.0	0.0	13.0	0.0	k__Bacteria; p__Firmicutes; c__Clostridia; o__Clostridiales; f__Peptostreptococcaceae; g__[Clostridium]; s__[Clostridium]_difficile
otu3120	0.0	13.0	0.0	0.0	0.0	0.0	0.0	0.0	k__Bacteria; p__Firmicutes; c__Clostridia; o__Clostridiales; f__Lachnospiraceae; g__Unclassified_Lachnospiraceae; s__Unclassified_Lachnospiraceae
otu3219	0.0	0.0	0.0	0.0	13.0	0.0	0.0	0.0	k__Bacteria; p__Firmicutes; c__Clostridia; o__Clostridiales; f__Unclassified_Clostridiales; g__Unclassified_Clostridiales; s__Unclassified_Clostridiales
otu3380	0.0	13.0	0.0	0.0	0.0	0.0	0.0	0.0	k__Bacteria; p__Firmicutes; c__Clostridia; o__Clostridiales; f__Christensenellaceae; g__Unclassified_Christensenellaceae; s__Unclassified_Christensenellaceae
otu3508	0.0	0.0	0.0	12.0	0.0	0.0	1.0	0.0	k__Bacteria; p__Bacteroidetes; c__Bacteroidia; o__Bacteroidales; f__Bacteroidaceae; g__Bacteroides; s__Bacteroides_uniformis
otu3530	0.0	0.0	0.0	7.0	0.0	0.0	6.0	0.0	k__Bacteria; p__Firmicutes; c__Clostridia; o__Clostridiales; f__Lachnospiraceae; g__Unclassified_Lachnospiraceae; s__Unclassified_Lachnospiraceae
otu3705	0.0	0.0	0.0	0.0	0.0	12.0	1.0	0.0	k__Bacteria; p__Firmicutes; c__Clostridia; o__Clostridiales; f__Ruminococcaceae; g__Ruminococcus; s__Ruminococcus_bromii
otu3726	0.0	0.0	0.0	0.0	0.0	0.0	0.0	13.0	k__Bacteria; p__Bacteroidetes; c__Bacteroidia; o__Bacteroidales; f__Bacteroidaceae; g__Bacteroides; s__Bacteroides_fragilis
otu3758	0.0	13.0	0.0	0.0	0.0	0.0	0.0	0.0	k__Bacteria; p__Firmicutes; c__Bacilli; o__Lactobacillales; f__Lactobacillaceae; g__Lactobacillus; s__Unclassified_Lactobacillus
otu3800	0.0	0.0	0.0	13.0	0.0	0.0	0.0	0.0	k__Bacteria; p__Firmicutes; c__Clostridia; o__Clostridiales; f__Veillonellaceae; g__Unclassified_Veillonellaceae; s__Unclassified_Veillonellaceae
otu3843	2.0	11.0	0.0	0.0	0.0	0.0	0.0	0.0	k__Bacteria; p__Firmicutes; c__Bacilli; o__Lactobacillales; f__Lactobacillaceae; g__Lactobacillus; s__Unclassified_Lactobacillus
otu3907	0.0	13.0	0.0	0.0	0.0	0.0	0.0	0.0	k__Bacteria; p__Firmicutes; c__Clostridia; o__Clostridiales; f__Unclassified_Clostridiales; g__Unclassified_Clostridiales; s__Unclassified_Clostridiales
otu4000	0.0	0.0	0.0	9.0	1.0	0.0	0.0	3.0	k__Bacteria; p__Firmicutes; c__Erysipelotrichi; o__Erysipelotrichales; f__Erysipelotrichaceae; g__[Eubacterium]; s__[Eubacterium]_dolichum
otu4109	0.0	13.0	0.0	0.0	0.0	0.0	0.0	0.0	k__Bacteria; p__Firmicutes; c__Bacilli; o__Lactobacillales; f__Lactobacillaceae; g__Lactobacillus; s__Unclassified_Lactobacillus
otu4361	2.0	1.0	0.0	0.0	0.0	1.0	9.0	0.0	k__Bacteria; p__Proteobacteria; c__Gammaproteobacteria; o__Enterobacteriales; f__Enterobacteriaceae; g__Unclassified_Enterobacteriaceae; s__Unclassified_Enterobacteriaceae
otu4527	0.0	13.0	0.0	0.0	0.0	0.0	0.0	0.0	k__Bacteria; p__Acidobacteria; c__Solibacteres; o__Solibacterales; f__Solibacteraceae; g__Candidatus_Solibacter; s__Unclassified_Candidatus_Solibacter
otu4570	0.0	1.0	0.0	0.0	7.0	0.0	5.0	0.0	k__Bacteria; p__Firmicutes; c__Bacilli; o__Lactobacillales; f__Enterococcaceae; g__Enterococcus; s__Unclassified_Enterococcus
otu4790	4.0	9.0	0.0	0.0	0.0	0.0	0.0	0.0	k__Bacteria; p__Proteobacteria; c__Gammaproteobacteria; o__Xanthomonadales; f__Sinobacteraceae; g__Unclassified_Sinobacteraceae; s__Unclassified_Sinobacteraceae
otu4850	0.0	0.0	0.0	2.0	0.0	10.0	1.0	0.0	k__Bacteria; p__Firmicutes; c__Clostridia; o__Clostridiales; f__Ruminococcaceae; g__Unclassified_Ruminococcaceae; s__Unclassified_Ruminococcaceae
otu4890	0.0	0.0	0.0	2.0	0.0	11.0	0.0	0.0	k__Bacteria; p__Firmicutes; c__Clostridia; o__Clostridiales; f__Veillonellaceae; g__Phascolarctobacterium; s__Unclassified_Phascolarctobacterium
otu4978	0.0	0.0	0.0	1.0	12.0	0.0	0.0	0.0	k__Bacteria; p__Bacteroidetes; c__Bacteroidia; o__Bacteroidales; f__Bacteroidaceae; g__Bacteroides; s__Bacteroides_ovatus
otu5155	0.0	13.0	0.0	0.0	0.0	0.0	0.0	0.0	k__Bacteria; p__Firmicutes; c__Clostridia; o__Clostridiales; f__Unclassified_Clostridiales; g__Unclassified_Clostridiales; s__Unclassified_Clostridiales
otu5285	0.0	0.0	0.0	0.0	0.0	13.0	0.0	0.0	k__Bacteria; p__Bacteroidetes; c__Bacteroidia; o__Bacteroidales; f__Bacteroidaceae; g__Bacteroides; s__Unclassified_Bacteroides
otu5364	0.0	13.0	0.0	0.0	0.0	0.0	0.0	0.0	k__Bacteria; p__Bacteroidetes; c__Bacteroidia; o__Bacteroidales; f__S24-7; g__Unclassified_S24-7; s__Unclassified_S24-7
otu5403	0.0	13.0	0.0	0.0	0.0	0.0	0.0	0.0	k__Bacteria; p__Firmicutes; c__Clostridia; o__Clostridiales; f__Ruminococcaceae; g__Unclassified_Ruminococcaceae; s__Unclassified_Ruminococcaceae
otu5979	0.0	0.0	0.0	13.0	0.0	0.0	0.0	0.0	k__Bacteria; p__Firmicutes; c__Clostridia; o__Clostridiales; f__Lachnospiraceae; g__[Ruminococcus]; s__[Ruminococcus]_gnavus
otu6082	13.0	0.0	0.0	0.0	0.0	0.0	0.0	0.0	k__Bacteria; p__Chlamydiae; c__Chlamydiia; o__Chlamydiales; f__Rhabdochlamydiaceae; g__Candidatus_Rhabdochlamydia; s__Unclassified_Candidatus_Rhabdochlamydia
otu6178	0.0	0.0	0.0	13.0	0.0	0.0	0.0	0.0	k__Bacteria; p__Bacteroidetes; c__Bacteroidia; o__Bacteroidales; f__Bacteroidaceae; g__Bacteroides; s__Unclassified_Bacteroides
otu6293	8.0	5.0	0.0	0.0	0.0	0.0	0.0	0.0	k__Bacteria; p__Firmicutes; c__Bacilli; o__Lactobacillales; f__Lactobacillaceae; g__Lactobacillus; s__Unclassified_Lactobacillus
otu6826	0.0	10.0	0.0	0.0	0.0	3.0	0.0	0.0	k__Bacteria; p__Firmicutes; c__Clostridia; o__Clostridiales; f__Lachnospiraceae; g__[Ruminococcus]; s__Unclassified_[Ruminococcus]
otu6837	0.0	8.0	0.0	5.0	0.0	0.0	0.0	0.0	k__Bacteria; p__Firmicutes; c__Clostridia; o__Clostridiales; f__Lachnospiraceae; g__Unclassified_Lachnospiraceae; s__Unclassified_Lachnospiraceae
otu6884	0.0	13.0	0.0	0.0	0.0	0.0	0.0	0.0	k__Bacteria; p__Firmicutes; c__Clostridia; o__Clostridiales; f__Unclassified_Clostridiales; g__Unclassified_Clostridiales; s__Unclassified_Clostridiales
otu7015	10.0	3.0	0.0	0.0	0.0	0.0	0.0	0.0	k__Bacteria; p__Proteobacteria; c__Gammaproteobacteria; o__Alteromonadales; f__[Chromatiaceae]; g__Unclassified_[Chromatiaceae]; s__Unclassified_[Chromatiaceae]
otu7056	0.0	13.0	0.0	0.0	0.0	0.0	0.0	0.0	k__Bacteria; p__Firmicutes; c__Clostridia; o__Clostridiales; f__Lachnospiraceae; g__Unclassified_Lachnospiraceae; s__Unclassified_Lachnospiraceae
otu7070	0.0	1.0	0.0	4.0	4.0	2.0	2.0	0.0	k__Bacteria; p__Actinobacteria; c__Coriobacteriia; o__Coriobacteriales; f__Coriobacteriaceae; g__Eggerthella; s__Eggerthella_lenta
otu7074	0.0	13.0	0.0	0.0	0.0	0.0	0.0	0.0	k__Bacteria; p__Firmicutes; c__Clostridia; o__Clostridiales; f__Lachnospiraceae; g__Blautia; s__Unclassified_Blautia
otu7077	12.0	0.0	0.0	0.0	0.0	0.0	1.0	0.0	k__Bacteria; p__Bacteroidetes; c__Bacteroidia; o__Bacteroidales; f__Prevotellaceae; g__Prevotella; s__Prevotella_melaninogenica
otu7118	0.0	0.0	0.0	0.0	4.0	7.0	2.0	0.0	k__Bacteria; p__Firmicutes; c__Clostridia; o__Clostridiales; f__Ruminococcaceae; g__Clostridium; s__Clostridium_methylpentosum
otu7158	0.0	1.0	4.0	0.0	0.0	0.0	7.0	1.0	k__Bacteria; p__Firmicutes; c__Bacilli; o__Lactobacillales; f__Streptococcaceae; g__Streptococcus; s__Unclassified_Streptococcus
otu7159	13.0	0.0	0.0	0.0	0.0	0.0	0.0	0.0	k__Bacteria; p__Bacteroidetes; c__Bacteroidia; o__Bacteroidales; f__Bacteroidaceae; g__Bacteroides; s__Unclassified_Bacteroides
otu7314	0.0	13.0	0.0	0.0	0.0	0.0	0.0	0.0	k__Bacteria; p__Firmicutes; c__Clostridia; o__Clostridiales; f__Unclassified_Clostridiales; g__Unclassified_Clostridiales; s__Unclassified_Clostridiales
otu7380	0.0	0.0	0.0	0.0	0.0	0.0	0.0	13.0	k__Bacteria; p__Firmicutes; c__Clostridia; o__Clostridiales; f__Lachnospiraceae; g__[Ruminococcus]; s__[Ruminococcus]_gnavus
otu7474	0.0	13.0	0.0	0.0	0.0	0.0	0.0	0.0	k__Bacteria; p__Bacteroidetes; c__Bacteroidia; o__Bacteroidales; f__S24-7; g__Unclassified_S24-7; s__Unclassified_S24-7
otu7493	0.0	13.0	0.0	0.0	0.0	0.0	0.0	0.0	k__Bacteria; p__Actinobacteria; c__Coriobacteriia; o__Coriobacteriales; f__Coriobacteriaceae; g__Adlercreutzia; s__Unclassified_Adlercreutzia
otu89	0.0	0.0	0.0	0.0	0.0	0.0	12.0	0.0	k__Bacteria; p__Firmicutes; c__Clostridia; o__Clostridiales; f__Ruminococcaceae; g__Unclassified_Ruminococcaceae; s__Unclassified_Ruminococcaceae
otu156	11.0	1.0	0.0	0.0	0.0	0.0	0.0	0.0	k__Bacteria; p__Proteobacteria; c__Alphaproteobacteria; o__Rhodospirillales; f__Rhodospirillaceae; g__Unclassified_Rhodospirillaceae; s__Unclassified_Rhodospirillaceae
otu250	0.0	0.0	0.0	0.0	12.0	0.0	0.0	0.0	k__Bacteria; p__Proteobacteria; c__Gammaproteobacteria; o__Enterobacteriales; f__Enterobacteriaceae; g__Unclassified_Enterobacteriaceae; s__Unclassified_Enterobacteriaceae
otu850	0.0	0.0	0.0	12.0	0.0	0.0	0.0	0.0	k__Bacteria; p__Firmicutes; c__Clostridia; o__Clostridiales; f__Unclassified_Clostridiales; g__Unclassified_Clostridiales; s__Unclassified_Clostridiales
otu897	0.0	0.0	0.0	0.0	0.0	0.0	0.0	12.0	k__Bacteria; p__Bacteroidetes; c__Bacteroidia; o__Bacteroidales; f__Bacteroidaceae; g__Bacteroides; s__Bacteroides_fragilis
otu939	0.0	0.0	0.0	0.0	0.0	12.0	0.0	0.0	k__Bacteria; p__Firmicutes; c__Clostridia; o__Clostridiales; f__Ruminococcaceae; g__Unclassified_Ruminococcaceae; s__Unclassified_Ruminococcaceae
otu1033	0.0	0.0	0.0	12.0	0.0	0.0	0.0	0.0	k__Bacteria; p__Firmicutes; c__Clostridia; o__Clostridiales; f__Lachnospiraceae; g__Unclassified_Lachnospiraceae; s__Unclassified_Lachnospiraceae
otu1110	4.0	6.0	0.0	0.0	0.0	2.0	0.0	0.0	k__Bacteria; p__Fusobacteria; c__Fusobacteriia; o__Fusobacteriales; f__Fusobacteriaceae; g__Fusobacterium; s__Unclassified_Fusobacterium
otu1200	0.0	12.0	0.0	0.0	0.0	0.0	0.0	0.0	k__Bacteria; p__Firmicutes; c__Clostridia; o__Clostridiales; f__Unclassified_Clostridiales; g__Unclassified_Clostridiales; s__Unclassified_Clostridiales
otu1236	0.0	12.0	0.0	0.0	0.0	0.0	0.0	0.0	k__Bacteria; p__Synergistetes; c__Synergistia; o__Synergistales; f__Synergistaceae; g__Synergistes; s__Unclassified_Synergistes
otu1289	0.0	0.0	0.0	2.0	0.0	1.0	9.0	0.0	k__Bacteria; p__Firmicutes; c__Clostridia; o__Clostridiales; f__Lachnospiraceae; g__Unclassified_Lachnospiraceae; s__Unclassified_Lachnospiraceae
otu1298	0.0	0.0	0.0	0.0	12.0	0.0	0.0	0.0	k__Bacteria; p__Proteobacteria; c__Gammaproteobacteria; o__Enterobacteriales; f__Enterobacteriaceae; g__Unclassified_Enterobacteriaceae; s__Unclassified_Enterobacteriaceae
otu1323	12.0	0.0	0.0	0.0	0.0	0.0	0.0	0.0	k__Bacteria; p__Firmicutes; c__Bacilli; o__Lactobacillales; f__Lactobacillaceae; g__Lactobacillus; s__Unclassified_Lactobacillus
otu1375	1.0	11.0	0.0	0.0	0.0	0.0	0.0	0.0	k__Bacteria; p__Firmicutes; c__Clostridia; o__Clostridiales; f__Ruminococcaceae; g__Unclassified_Ruminococcaceae; s__Unclassified_Ruminococcaceae
otu1860	12.0	0.0	0.0	0.0	0.0	0.0	0.0	0.0	k__Bacteria; p__Proteobacteria; c__Betaproteobacteria; o__Burkholderiales; f__Alcaligenaceae; g__Sutterella; s__Unclassified_Sutterella
otu1962	0.0	12.0	0.0	0.0	0.0	0.0	0.0	0.0	k__Bacteria; p__Firmicutes; c__Bacilli; o__Lactobacillales; f__Lactobacillaceae; g__Lactobacillus; s__Unclassified_Lactobacillus
otu2324	8.0	4.0	0.0	0.0	0.0	0.0	0.0	0.0	k__Bacteria; p__Proteobacteria; c__Betaproteobacteria; o__Burkholderiales; f__Alcaligenaceae; g__Oligella; s__Unclassified_Oligella
otu2474	0.0	12.0	0.0	0.0	0.0	0.0	0.0	0.0	k__Bacteria; p__Firmicutes; c__Bacilli; o__Lactobacillales; f__Lactobacillaceae; g__Lactobacillus; s__Unclassified_Lactobacillus
otu2476	2.0	10.0	0.0	0.0	0.0	0.0	0.0	0.0	k__Bacteria; p__Proteobacteria; c__Gammaproteobacteria; o__Pseudomonadales; f__Pseudomonadaceae; g__Unclassified_Pseudomonadaceae; s__Unclassified_Pseudomonadaceae
otu2568	0.0	0.0	0.0	0.0	0.0	12.0	0.0	0.0	k__Bacteria; p__Firmicutes; c__Clostridia; o__Clostridiales; f__Lachnospiraceae; g__Unclassified_Lachnospiraceae; s__Unclassified_Lachnospiraceae
otu2582	10.0	2.0	0.0	0.0	0.0	0.0	0.0	0.0	k__Bacteria; p__Firmicutes; c__Bacilli; o__Lactobacillales; f__Lactobacillaceae; g__Lactobacillus; s__Unclassified_Lactobacillus
otu3088	0.0	0.0	0.0	0.0	0.0	0.0	12.0	0.0	k__Bacteria; p__Bacteroidetes; c__Bacteroidia; o__Bacteroidales; f__Bacteroidaceae; g__Bacteroides; s__Unclassified_Bacteroides
otu3203	0.0	0.0	0.0	9.0	1.0	0.0	2.0	0.0	k__Bacteria; p__Firmicutes; c__Clostridia; o__Clostridiales; f__Unclassified_Clostridiales; g__Unclassified_Clostridiales; s__Unclassified_Clostridiales
otu3313	0.0	0.0	0.0	12.0	0.0	0.0	0.0	0.0	k__Bacteria; p__Firmicutes; c__Clostridia; o__Clostridiales; f__Veillonellaceae; g__Megamonas; s__Unclassified_Megamonas
otu3496	0.0	12.0	0.0	0.0	0.0	0.0	0.0	0.0	k__Bacteria; p__Firmicutes; c__Bacilli; o__Lactobacillales; f__Lactobacillaceae; g__Lactobacillus; s__Unclassified_Lactobacillus
otu3610	0.0	12.0	0.0	0.0	0.0	0.0	0.0	0.0	k__Bacteria; p__Firmicutes; c__Clostridia; o__Clostridiales; f__Ruminococcaceae; g__Unclassified_Ruminococcaceae; s__Unclassified_Ruminococcaceae
otu3613	0.0	0.0	0.0	12.0	0.0	0.0	0.0	0.0	k__Bacteria; p__Bacteroidetes; c__Bacteroidia; o__Bacteroidales; f__Bacteroidaceae; g__Bacteroides; s__Unclassified_Bacteroides
otu3687	0.0	0.0	0.0	0.0	0.0	12.0	0.0	0.0	k__Bacteria; p__Firmicutes; c__Clostridia; o__Clostridiales; f__Veillonellaceae; g__Phascolarctobacterium; s__Unclassified_Phascolarctobacterium
otu3772	0.0	0.0	0.0	12.0	0.0	0.0	0.0	0.0	k__Bacteria; p__Bacteroidetes; c__Bacteroidia; o__Bacteroidales; f__Bacteroidaceae; g__Bacteroides; s__Unclassified_Bacteroides
otu3810	0.0	0.0	0.0	0.0	0.0	5.0	0.0	7.0	k__Bacteria; p__Firmicutes; c__Clostridia; o__Clostridiales; f__Ruminococcaceae; g__Unclassified_Ruminococcaceae; s__Unclassified_Ruminococcaceae
otu3951	0.0	12.0	0.0	0.0	0.0	0.0	0.0	0.0	k__Bacteria; p__Firmicutes; c__Clostridia; o__Clostridiales; f__Unclassified_Clostridiales; g__Unclassified_Clostridiales; s__Unclassified_Clostridiales
otu4070	12.0	0.0	0.0	0.0	0.0	0.0	0.0	0.0	k__Bacteria; p__Actinobacteria; c__Acidimicrobiia; o__Acidimicrobiales; f__Unclassified_Acidimicrobiales; g__Unclassified_Acidimicrobiales; s__Unclassified_Acidimicrobiales
otu4092	0.0	12.0	0.0	0.0	0.0	0.0	0.0	0.0	k__Bacteria; p__Firmicutes; c__Bacilli; o__Lactobacillales; f__Enterococcaceae; g__Enterococcus; s__Unclassified_Enterococcus
otu4121	1.0	0.0	0.0	4.0	0.0	4.0	0.0	3.0	k__Bacteria; p__Bacteroidetes; c__Bacteroidia; o__Bacteroidales; f__Bacteroidaceae; g__Bacteroides; s__Unclassified_Bacteroides
otu4252	0.0	0.0	0.0	0.0	3.0	0.0	9.0	0.0	k__Bacteria; p__Firmicutes; c__Clostridia; o__Clostridiales; f__Ruminococcaceae; g__Unclassified_Ruminococcaceae; s__Unclassified_Ruminococcaceae
otu4326	12.0	0.0	0.0	0.0	0.0	0.0	0.0	0.0	k__Bacteria; p__Firmicutes; c__Clostridia; o__Clostridiales; f__Ruminococcaceae; g__Unclassified_Ruminococcaceae; s__Unclassified_Ruminococcaceae
otu4437	0.0	12.0	0.0	0.0	0.0	0.0	0.0	0.0	k__Bacteria; p__Firmicutes; c__Clostridia; o__Clostridiales; f__Ruminococcaceae; g__Unclassified_Ruminococcaceae; s__Unclassified_Ruminococcaceae
otu4491	0.0	0.0	0.0	12.0	0.0	0.0	0.0	0.0	k__Bacteria; p__Firmicutes; c__Clostridia; o__Clostridiales; f__Lachnospiraceae; g__Unclassified_Lachnospiraceae; s__Unclassified_Lachnospiraceae
otu4708	0.0	0.0	0.0	8.0	0.0	0.0	4.0	0.0	k__Bacteria; p__Firmicutes; c__Clostridia; o__Clostridiales; f__Lachnospiraceae; g__Unclassified_Lachnospiraceae; s__Unclassified_Lachnospiraceae
otu4767	0.0	0.0	0.0	9.0	0.0	0.0	3.0	0.0	k__Bacteria; p__Bacteroidetes; c__Bacteroidia; o__Bacteroidales; f__Bacteroidaceae; g__Bacteroides; s__Unclassified_Bacteroides
otu4792	0.0	0.0	0.0	10.0	0.0	0.0	2.0	0.0	k__Bacteria; p__Firmicutes; c__Clostridia; o__Clostridiales; f__Lachnospiraceae; g__Unclassified_Lachnospiraceae; s__Unclassified_Lachnospiraceae
otu4965	0.0	10.0	1.0	0.0	0.0	0.0	0.0	1.0	k__Bacteria; p__Firmicutes; c__Bacilli; o__Lactobacillales; f__Lactobacillaceae; g__Lactobacillus; s__Lactobacillus_zeae
otu5045	0.0	0.0	0.0	0.0	0.0	6.0	6.0	0.0	k__Bacteria; p__Bacteroidetes; c__Bacteroidia; o__Bacteroidales; f__Bacteroidaceae; g__Bacteroides; s__Bacteroides_uniformis
otu5073	12.0	0.0	0.0	0.0	0.0	0.0	0.0	0.0	k__Bacteria; p__Proteobacteria; c__Betaproteobacteria; o__Burkholderiales; f__Comamonadaceae; g__Unclassified_Comamonadaceae; s__Unclassified_Comamonadaceae
otu5383	7.0	5.0	0.0	0.0	0.0	0.0	0.0	0.0	k__Bacteria; p__Firmicutes; c__Bacilli; o__Lactobacillales; f__Lactobacillaceae; g__Lactobacillus; s__Unclassified_Lactobacillus
otu5467	12.0	0.0	0.0	0.0	0.0	0.0	0.0	0.0	k__Bacteria; p__Firmicutes; c__Erysipelotrichi; o__Erysipelotrichales; f__Erysipelotrichaceae; g__Allobaculum; s__Unclassified_Allobaculum
otu5568	0.0	1.0	0.0	10.0	0.0	0.0	0.0	1.0	k__Bacteria; p__Firmicutes; c__Clostridia; o__Clostridiales; f__Lachnospiraceae; g__Unclassified_Lachnospiraceae; s__Unclassified_Lachnospiraceae
otu5890	0.0	0.0	0.0	0.0	12.0	0.0	0.0	0.0	k__Bacteria; p__Proteobacteria; c__Gammaproteobacteria; o__Enterobacteriales; f__Enterobacteriaceae; g__Citrobacter; s__Unclassified_Citrobacter
otu6101	12.0	0.0	0.0	0.0	0.0	0.0	0.0	0.0	k__Bacteria; p__Firmicutes; c__Bacilli; o__Lactobacillales; f__Lactobacillaceae; g__Lactobacillus; s__Unclassified_Lactobacillus
otu6298	12.0	0.0	0.0	0.0	0.0	0.0	0.0	0.0	k__Bacteria; p__Bacteroidetes; c__Bacteroidia; o__Bacteroidales; f__Rikenellaceae; g__Unclassified_Rikenellaceae; s__Unclassified_Rikenellaceae
otu6680	0.0	12.0	0.0	0.0	0.0	0.0	0.0	0.0	k__Bacteria; p__Firmicutes; c__Clostridia; o__Clostridiales; f__Unclassified_Clostridiales; g__Unclassified_Clostridiales; s__Unclassified_Clostridiales
otu6733	0.0	0.0	0.0	0.0	0.0	0.0	12.0	0.0	k__Bacteria; p__Bacteroidetes; c__Bacteroidia; o__Bacteroidales; f__Bacteroidaceae; g__Bacteroides; s__Unclassified_Bacteroides
otu6840	4.0	8.0	0.0	0.0	0.0	0.0	0.0	0.0	k__Bacteria; p__Bacteroidetes; c__Cytophagia; o__Cytophagales; f__Cytophagaceae; g__Unclassified_Cytophagaceae; s__Unclassified_Cytophagaceae
otu6841	12.0	0.0	0.0	0.0	0.0	0.0	0.0	0.0	k__Bacteria; p__Actinobacteria; c__Actinobacteria; o__Actinomycetales; f__Nocardiaceae; g__Nocardia; s__Unclassified_Nocardia
otu7043	0.0	0.0	0.0	6.0	0.0	6.0	0.0	0.0	k__Bacteria; p__Bacteroidetes; c__Bacteroidia; o__Bacteroidales; f__Bacteroidaceae; g__Bacteroides; s__Unclassified_Bacteroides
otu7076	0.0	0.0	0.0	0.0	12.0	0.0	0.0	0.0	k__Bacteria; p__Proteobacteria; c__Gammaproteobacteria; o__Enterobacteriales; f__Enterobacteriaceae; g__Unclassified_Enterobacteriaceae; s__Unclassified_Enterobacteriaceae
otu7164	0.0	12.0	0.0	0.0	0.0	0.0	0.0	0.0	k__Bacteria; p__Firmicutes; c__Clostridia; o__Clostridiales; f__Ruminococcaceae; g__Unclassified_Ruminococcaceae; s__Unclassified_Ruminococcaceae
otu7266	0.0	11.0	0.0	0.0	0.0	0.0	0.0	1.0	k__Bacteria; p__Actinobacteria; c__Actinobacteria; o__Actinomycetales; f__Dietziaceae; g__Dietzia; s__Unclassified_Dietzia
otu7373	12.0	0.0	0.0	0.0	0.0	0.0	0.0	0.0	k__Bacteria; p__Proteobacteria; c__Gammaproteobacteria; o__Alteromonadales; f__Alteromonadaceae; g__Alteromonas; s__Unclassified_Alteromonas
otu7379	0.0	0.0	0.0	5.0	7.0	0.0	0.0	0.0	k__Bacteria; p__Firmicutes; c__Clostridia; o__Clostridiales; f__Lachnospiraceae; g__Robinsoniella; s__Robinsoniella_peoriensis
otu7429	0.0	12.0	0.0	0.0	0.0	0.0	0.0	0.0	k__Bacteria; p__Firmicutes; c__Clostridia; o__Clostridiales; f__Unclassified_Clostridiales; g__Unclassified_Clostridiales; s__Unclassified_Clostridiales
otu7514	10.0	0.0	2.0	0.0	0.0	0.0	0.0	0.0	k__Bacteria; p__Actinobacteria; c__Actinobacteria; o__Actinomycetales; f__Micrococcaceae; g__Kocuria; s__Kocuria_rhizophila
otu134	0.0	0.0	0.0	0.0	0.0	11.0	0.0	0.0	k__Bacteria; p__Firmicutes; c__Clostridia; o__Clostridiales; f__Ruminococcaceae; g__Unclassified_Ruminococcaceae; s__Unclassified_Ruminococcaceae
otu193	11.0	0.0	0.0	0.0	0.0	0.0	0.0	0.0	k__Bacteria; p__Proteobacteria; c__Alphaproteobacteria; o__Sphingomonadales; f__Sphingomonadaceae; g__Unclassified_Sphingomonadaceae; s__Unclassified_Sphingomonadaceae
otu219	0.0	11.0	0.0	0.0	0.0	0.0	0.0	0.0	k__Bacteria; p__Actinobacteria; c__Actinobacteria; o__Actinomycetales; f__Micrococcaceae; g__Arthrobacter; s__Unclassified_Arthrobacter
otu239	0.0	0.0	10.0	0.0	0.0	0.0	1.0	0.0	k__Bacteria; p__Actinobacteria; c__Actinobacteria; o__Bifidobacteriales; f__Bifidobacteriaceae; g__Bifidobacterium; s__Bifidobacterium_longum
otu369	0.0	0.0	0.0	11.0	0.0	0.0	0.0	0.0	k__Bacteria; p__Firmicutes; c__Erysipelotrichi; o__Erysipelotrichales; f__Erysipelotrichaceae; g__[Eubacterium]; s__[Eubacterium]_dolichum
otu807	0.0	0.0	0.0	11.0	0.0	0.0	0.0	0.0	k__Bacteria; p__Firmicutes; c__Clostridia; o__Clostridiales; f__Lachnospiraceae; g__[Ruminococcus]; s__[Ruminococcus]_gnavus
otu919	10.0	0.0	0.0	0.0	1.0	0.0	0.0	0.0	k__Bacteria; p__Bacteroidetes; c__Bacteroidia; o__Bacteroidales; f__Unclassified_Bacteroidales; g__Unclassified_Bacteroidales; s__Unclassified_Bacteroidales
otu944	0.0	0.0	0.0	6.0	0.0	0.0	3.0	2.0	k__Bacteria; p__Firmicutes; c__Clostridia; o__Clostridiales; f__Lachnospiraceae; g__Unclassified_Lachnospiraceae; s__Unclassified_Lachnospiraceae
otu1371	0.0	0.0	0.0	11.0	0.0	0.0	0.0	0.0	k__Bacteria; p__Firmicutes; c__Clostridia; o__Clostridiales; f__Lachnospiraceae; g__[Ruminococcus]; s__[Ruminococcus]_gnavus
otu1589	3.0	8.0	0.0	0.0	0.0	0.0	0.0	0.0	k__Bacteria; p__Bacteroidetes; c__Bacteroidia; o__Bacteroidales; f__Porphyromonadaceae; g__Parabacteroides; s__Unclassified_Parabacteroides
otu1762	11.0	0.0	0.0	0.0	0.0	0.0	0.0	0.0	k__Bacteria; p__Firmicutes; c__Clostridia; o__Clostridiales; f__Unclassified_Clostridiales; g__Unclassified_Clostridiales; s__Unclassified_Clostridiales
otu1913	11.0	0.0	0.0	0.0	0.0	0.0	0.0	0.0	k__Bacteria; p__Chloroflexi; c__Chloroflexi; o__Herpetosiphonales; f__Unclassified_Herpetosiphonales; g__Unclassified_Herpetosiphonales; s__Unclassified_Herpetosiphonales
otu2101	0.0	0.0	0.0	0.0	0.0	3.0	8.0	0.0	k__Bacteria; p__Proteobacteria; c__Gammaproteobacteria; o__Enterobacteriales; f__Enterobacteriaceae; g__Unclassified_Enterobacteriaceae; s__Unclassified_Enterobacteriaceae
otu2280	8.0	3.0	0.0	0.0	0.0	0.0	0.0	0.0	k__Bacteria; p__Firmicutes; c__Clostridia; o__Clostridiales; f__Ruminococcaceae; g__Unclassified_Ruminococcaceae; s__Unclassified_Ruminococcaceae
otu2375	0.0	0.0	0.0	0.0	0.0	0.0	11.0	0.0	k__Bacteria; p__Proteobacteria; c__Gammaproteobacteria; o__Enterobacteriales; f__Enterobacteriaceae; g__Unclassified_Enterobacteriaceae; s__Unclassified_Enterobacteriaceae
otu2639	0.0	0.0	0.0	7.0	0.0	4.0	0.0	0.0	k__Bacteria; p__Firmicutes; c__Clostridia; o__Clostridiales; f__Lachnospiraceae; g__Blautia; s__Unclassified_Blautia
otu2723	0.0	0.0	0.0	0.0	0.0	1.0	10.0	0.0	k__Bacteria; p__Proteobacteria; c__Gammaproteobacteria; o__Enterobacteriales; f__Enterobacteriaceae; g__Unclassified_Enterobacteriaceae; s__Unclassified_Enterobacteriaceae
otu2917	0.0	0.0	0.0	0.0	0.0	2.0	9.0	0.0	k__Bacteria; p__Proteobacteria; c__Gammaproteobacteria; o__Enterobacteriales; f__Enterobacteriaceae; g__Unclassified_Enterobacteriaceae; s__Unclassified_Enterobacteriaceae
otu2925	3.0	0.0	0.0	0.0	0.0	2.0	6.0	0.0	k__Bacteria; p__Firmicutes; c__Clostridia; o__Clostridiales; f__Lachnospiraceae; g__Blautia; s__Blautia_producta
otu3216	0.0	0.0	0.0	0.0	11.0	0.0	0.0	0.0	k__Bacteria; p__Proteobacteria; c__Gammaproteobacteria; o__Enterobacteriales; f__Enterobacteriaceae; g__Klebsiella; s__Unclassified_Klebsiella
otu3289	0.0	0.0	0.0	0.0	11.0	0.0	0.0	0.0	k__Bacteria; p__Proteobacteria; c__Gammaproteobacteria; o__Enterobacteriales; f__Enterobacteriaceae; g__Unclassified_Enterobacteriaceae; s__Unclassified_Enterobacteriaceae
otu3329	1.0	0.0	0.0	8.0	0.0	1.0	1.0	0.0	k__Bacteria; p__Bacteroidetes; c__Bacteroidia; o__Bacteroidales; f__Bacteroidaceae; g__Bacteroides; s__Unclassified_Bacteroides
otu3384	0.0	11.0	0.0	0.0	0.0	0.0	0.0	0.0	k__Bacteria; p__Bacteroidetes; c__Bacteroidia; o__Bacteroidales; f__Prevotellaceae; g__Unclassified_Prevotellaceae; s__Unclassified_Prevotellaceae
otu3430	2.0	9.0	0.0	0.0	0.0	0.0	0.0	0.0	k__Bacteria; p__Chlamydiae; c__Chlamydiia; o__Chlamydiales; f__Rhabdochlamydiaceae; g__Candidatus_Rhabdochlamydia; s__Unclassified_Candidatus_Rhabdochlamydia
otu3575	0.0	11.0	0.0	0.0	0.0	0.0	0.0	0.0	k__Bacteria; p__Firmicutes; c__Bacilli; o__Lactobacillales; f__Lactobacillaceae; g__Lactobacillus; s__Unclassified_Lactobacillus
otu3671	0.0	0.0	0.0	8.0	0.0	0.0	3.0	0.0	k__Bacteria; p__Bacteroidetes; c__Bacteroidia; o__Bacteroidales; f__Bacteroidaceae; g__Bacteroides; s__Unclassified_Bacteroides
otu3833	11.0	0.0	0.0	0.0	0.0	0.0	0.0	0.0	k__Bacteria; p__Bacteroidetes; c__Bacteroidia; o__Bacteroidales; f__Bacteroidaceae; g__Bacteroides; s__Unclassified_Bacteroides
otu3859	0.0	0.0	0.0	11.0	0.0	0.0	0.0	0.0	k__Bacteria; p__Firmicutes; c__Clostridia; o__Clostridiales; f__Lachnospiraceae; g__Unclassified_Lachnospiraceae; s__Unclassified_Lachnospiraceae
otu3892	0.0	0.0	0.0	10.0	0.0	0.0	1.0	0.0	k__Bacteria; p__Firmicutes; c__Clostridia; o__Clostridiales; f__Ruminococcaceae; g__Oscillospira; s__Unclassified_Oscillospira
otu4163	0.0	0.0	0.0	5.0	1.0	3.0	2.0	0.0	k__Bacteria; p__Firmicutes; c__Clostridia; o__Clostridiales; f__Lachnospiraceae; g__Unclassified_Lachnospiraceae; s__Unclassified_Lachnospiraceae
otu4165	6.0	5.0	0.0	0.0	0.0	0.0	0.0	0.0	k__Bacteria; p__Proteobacteria; c__Gammaproteobacteria; o__Xanthomonadales; f__Xanthomonadaceae; g__Thermomonas; s__Thermomonas_fusca
otu4455	1.0	0.0	0.0	0.0	0.0	3.0	0.0	7.0	k__Bacteria; p__Bacteroidetes; c__Bacteroidia; o__Bacteroidales; f__Bacteroidaceae; g__Bacteroides; s__Unclassified_Bacteroides
otu4568	0.0	11.0	0.0	0.0	0.0	0.0	0.0	0.0	k__Bacteria; p__Firmicutes; c__Bacilli; o__Bacillales; f__Staphylococcaceae; g__Staphylococcus; s__Staphylococcus_sciuri
otu4686	0.0	11.0	0.0	0.0	0.0	0.0	0.0	0.0	k__Bacteria; p__Firmicutes; c__Clostridia; o__Clostridiales; f__Lachnospiraceae; g__Unclassified_Lachnospiraceae; s__Unclassified_Lachnospiraceae
otu4703	0.0	0.0	0.0	0.0	9.0	0.0	2.0	0.0	k__Bacteria; p__Firmicutes; c__Clostridia; o__Clostridiales; f__Ruminococcaceae; g__Faecalibacterium; s__Faecalibacterium_prausnitzii
otu4723	11.0	0.0	0.0	0.0	0.0	0.0	0.0	0.0	k__Bacteria; p__Firmicutes; c__Clostridia; o__Clostridiales; f__Ruminococcaceae; g__Unclassified_Ruminococcaceae; s__Unclassified_Ruminococcaceae
otu4900	0.0	3.0	0.0	0.0	0.0	8.0	0.0	0.0	k__Bacteria; p__Firmicutes; c__Clostridia; o__Clostridiales; f__Ruminococcaceae; g__Unclassified_Ruminococcaceae; s__Unclassified_Ruminococcaceae
otu5004	7.0	4.0	0.0	0.0	0.0	0.0	0.0	0.0	k__Bacteria; p__Bacteroidetes; c__[Saprospirae]; o__[Saprospirales]; f__Chitinophagaceae; g__Sediminibacterium; s__Unclassified_Sediminibacterium
otu5107	10.0	1.0	0.0	0.0	0.0	0.0	0.0	0.0	k__Bacteria; p__Firmicutes; c__Clostridia; o__Clostridiales; f__Lachnospiraceae; g__Blautia; s__Unclassified_Blautia
otu5409	0.0	0.0	0.0	11.0	0.0	0.0	0.0	0.0	k__Bacteria; p__Firmicutes; c__Clostridia; o__Clostridiales; f__Lachnospiraceae; g__[Ruminococcus]; s__[Ruminococcus]_gnavus
otu5475	11.0	0.0	0.0	0.0	0.0	0.0	0.0	0.0	k__Bacteria; p__Actinobacteria; c__Actinobacteria; o__Actinomycetales; f__Streptomycetaceae; g__Streptomyces; s__Unclassified_Streptomyces
otu5619	0.0	0.0	0.0	1.0	0.0	3.0	0.0	7.0	k__Bacteria; p__Bacteroidetes; c__Bacteroidia; o__Bacteroidales; f__Bacteroidaceae; g__Bacteroides; s__Unclassified_Bacteroides
otu5633	0.0	0.0	0.0	7.0	3.0	0.0	0.0	1.0	k__Bacteria; p__Firmicutes; c__Erysipelotrichi; o__Erysipelotrichales; f__Erysipelotrichaceae; g__[Eubacterium]; s__[Eubacterium]_dolichum
otu5653	0.0	11.0	0.0	0.0	0.0	0.0	0.0	0.0	k__Bacteria; p__Bacteroidetes; c__Bacteroidia; o__Bacteroidales; f__S24-7; g__Unclassified_S24-7; s__Unclassified_S24-7
otu5669	0.0	0.0	0.0	0.0	0.0	0.0	11.0	0.0	k__Bacteria; p__Bacteroidetes; c__Bacteroidia; o__Bacteroidales; f__Bacteroidaceae; g__Bacteroides; s__Unclassified_Bacteroides
otu5764	0.0	0.0	0.0	0.0	0.0	0.0	11.0	0.0	k__Bacteria; p__Firmicutes; c__Clostridia; o__Clostridiales; f__Lachnospiraceae; g__Blautia; s__Blautia_producta
otu5780	3.0	8.0	0.0	0.0	0.0	0.0	0.0	0.0	k__Bacteria; p__Proteobacteria; c__Betaproteobacteria; o__Burkholderiales; f__Alcaligenaceae; g__Sutterella; s__Unclassified_Sutterella
otu5882	0.0	0.0	0.0	0.0	1.0	0.0	10.0	0.0	k__Bacteria; p__Firmicutes; c__Clostridia; o__Clostridiales; f__Ruminococcaceae; g__Unclassified_Ruminococcaceae; s__Unclassified_Ruminococcaceae
otu5959	0.0	0.0	0.0	9.0	1.0	1.0	0.0	0.0	k__Bacteria; p__Firmicutes; c__Clostridia; o__Clostridiales; f__Lachnospiraceae; g__Unclassified_Lachnospiraceae; s__Unclassified_Lachnospiraceae
otu6202	7.0	4.0	0.0	0.0	0.0	0.0	0.0	0.0	k__Bacteria; p__Bacteroidetes; c__Bacteroidia; o__Bacteroidales; f__S24-7; g__Unclassified_S24-7; s__Unclassified_S24-7
otu6205	11.0	0.0	0.0	0.0	0.0	0.0	0.0	0.0	k__Bacteria; p__Proteobacteria; c__Deltaproteobacteria; o__Desulfovibrionales; f__Desulfovibrionaceae; g__Desulfovibrio; s__Unclassified_Desulfovibrio
otu6247	0.0	0.0	0.0	0.0	5.0	0.0	4.0	2.0	k__Bacteria; p__Firmicutes; c__Erysipelotrichi; o__Erysipelotrichales; f__Erysipelotrichaceae; g__Unclassified_Erysipelotrichaceae; s__Unclassified_Erysipelotrichaceae
otu6341	0.0	1.0	7.0	0.0	0.0	0.0	2.0	1.0	k__Bacteria; p__Firmicutes; c__Bacilli; o__Lactobacillales; f__Enterococcaceae; g__Enterococcus; s__Unclassified_Enterococcus
otu6668	0.0	0.0	0.0	0.0	0.0	5.0	6.0	0.0	k__Bacteria; p__Proteobacteria; c__Betaproteobacteria; o__Burkholderiales; f__Burkholderiaceae; g__Burkholderia; s__Unclassified_Burkholderia
otu6695	0.0	0.0	0.0	0.0	9.0	0.0	2.0	0.0	k__Bacteria; p__Firmicutes; c__Clostridia; o__Clostridiales; f__Peptostreptococcaceae; g__[Clostridium]; s__[Clostridium]_difficile
otu6776	0.0	0.0	0.0	0.0	0.0	0.0	0.0	11.0	k__Bacteria; p__Bacteroidetes; c__Bacteroidia; o__Bacteroidales; f__Bacteroidaceae; g__Bacteroides; s__Bacteroides_fragilis
otu6931	0.0	0.0	11.0	0.0	0.0	0.0	0.0	0.0	k__Bacteria; p__Proteobacteria; c__Betaproteobacteria; o__Burkholderiales; f__Oxalobacteraceae; g__Unclassified_Oxalobacteraceae; s__Unclassified_Oxalobacteraceae
otu7264	0.0	0.0	0.0	11.0	0.0	0.0	0.0	0.0	k__Bacteria; p__Firmicutes; c__Clostridia; o__Clostridiales; f__Unclassified_Clostridiales; g__Unclassified_Clostridiales; s__Unclassified_Clostridiales
otu7434	0.0	0.0	0.0	0.0	0.0	0.0	11.0	0.0	k__Bacteria; p__Firmicutes; c__Clostridia; o__Clostridiales; f__Veillonellaceae; g__Veillonella; s__Veillonella_dispar
otu116	0.0	0.0	0.0	0.0	0.0	10.0	0.0	0.0	k__Bacteria; p__Firmicutes; c__Clostridia; o__Clostridiales; f__Ruminococcaceae; g__Anaerotruncus; s__Unclassified_Anaerotruncus
otu228	0.0	0.0	0.0	0.0	10.0	0.0	0.0	0.0	k__Bacteria; p__Firmicutes; c__Bacilli; o__Lactobacillales; f__Enterococcaceae; g__Vagococcus; s__Unclassified_Vagococcus
otu291	0.0	0.0	0.0	10.0	0.0	0.0	0.0	0.0	k__Bacteria; p__Proteobacteria; c__Alphaproteobacteria; o__RF32; f__Unclassified_RF32; g__Unclassified_RF32; s__Unclassified_RF32
otu292	0.0	0.0	0.0	2.0	0.0	8.0	0.0	0.0	k__Bacteria; p__Firmicutes; c__Clostridia; o__Clostridiales; f__Veillonellaceae; g__Phascolarctobacterium; s__Unclassified_Phascolarctobacterium
otu311	1.0	5.0	0.0	0.0	0.0	0.0	4.0	0.0	k__Bacteria; p__Proteobacteria; c__Gammaproteobacteria; o__Pseudomonadales; f__Moraxellaceae; g__Acinetobacter; s__Unclassified_Acinetobacter
otu352	7.0	0.0	0.0	0.0	0.0	0.0	3.0	0.0	k__Bacteria; p__Firmicutes; c__Clostridia; o__Clostridiales; f__Veillonellaceae; g__Veillonella; s__Veillonella_dispar
otu360	0.0	0.0	0.0	10.0	0.0	0.0	0.0	0.0	k__Bacteria; p__Firmicutes; c__Clostridia; o__Clostridiales; f__Veillonellaceae; g__Megamonas; s__Unclassified_Megamonas
otu371	0.0	0.0	0.0	7.0	0.0	0.0	3.0	0.0	k__Bacteria; p__Firmicutes; c__Clostridia; o__Clostridiales; f__Lachnospiraceae; g__Unclassified_Lachnospiraceae; s__Unclassified_Lachnospiraceae
otu375	6.0	3.0	1.0	0.0	0.0	0.0	0.0	0.0	k__Bacteria; p__Firmicutes; c__Clostridia; o__Clostridiales; f__Unclassified_Clostridiales; g__Unclassified_Clostridiales; s__Unclassified_Clostridiales
otu384	6.0	1.0	0.0	0.0	0.0	2.0	1.0	0.0	k__Bacteria; p__Proteobacteria; c__Alphaproteobacteria; o__Rhizobiales; f__Methylobacteriaceae; g__Unclassified_Methylobacteriaceae; s__Unclassified_Methylobacteriaceae
otu533	7.0	1.0	1.0	0.0	0.0	1.0	0.0	0.0	k__Bacteria; p__Proteobacteria; c__Alphaproteobacteria; o__Rhizobiales; f__Hyphomicrobiaceae; g__Devosia; s__Unclassified_Devosia
otu547	0.0	9.0	0.0	0.0	1.0	0.0	0.0	0.0	k__Bacteria; p__Firmicutes; c__Clostridia; o__Clostridiales; f__Unclassified_Clostridiales; g__Unclassified_Clostridiales; s__Unclassified_Clostridiales
otu652	0.0	0.0	4.0	0.0	0.0	0.0	0.0	6.0	k__Bacteria; p__Firmicutes; c__Bacilli; o__Lactobacillales; f__Carnobacteriaceae; g__Granulicatella; s__Unclassified_Granulicatella
otu676	0.0	8.0	0.0	2.0	0.0	0.0	0.0	0.0	k__Bacteria; p__Firmicutes; c__Clostridia; o__Clostridiales; f__Lachnospiraceae; g__Blautia; s__Unclassified_Blautia
otu692	0.0	10.0	0.0	0.0	0.0	0.0	0.0	0.0	k__Bacteria; p__Firmicutes; c__Bacilli; o__Lactobacillales; f__Lactobacillaceae; g__Lactobacillus; s__Unclassified_Lactobacillus
otu783	10.0	0.0	0.0	0.0	0.0	0.0	0.0	0.0	k__Bacteria; p__Proteobacteria; c__Betaproteobacteria; o__Burkholderiales; f__Comamonadaceae; g__Methylibium; s__Unclassified_Methylibium
otu838	0.0	10.0	0.0	0.0	0.0	0.0	0.0	0.0	k__Bacteria; p__Firmicutes; c__Clostridia; o__Clostridiales; f__Ruminococcaceae; g__Oscillospira; s__Unclassified_Oscillospira
otu947	0.0	10.0	0.0	0.0	0.0	0.0	0.0	0.0	k__Bacteria; p__Firmicutes; c__Clostridia; o__Clostridiales; f__Clostridiaceae; g__Clostridium; s__Unclassified_Clostridium
otu1107	0.0	0.0	0.0	0.0	3.0	0.0	2.0	5.0	k__Bacteria; p__Firmicutes; c__Clostridia; o__Clostridiales; f__Peptostreptococcaceae; g__[Clostridium]; s__[Clostridium]_difficile
otu1141	0.0	10.0	0.0	0.0	0.0	0.0	0.0	0.0	k__Bacteria; p__Firmicutes; c__Clostridia; o__Clostridiales; f__Lachnospiraceae; g__Blautia; s__Unclassified_Blautia
otu1213	0.0	10.0	0.0	0.0	0.0	0.0	0.0	0.0	k__Bacteria; p__Firmicutes; c__Bacilli; o__Lactobacillales; f__Lactobacillaceae; g__Lactobacillus; s__Unclassified_Lactobacillus
otu1219	0.0	0.0	0.0	0.0	0.0	10.0	0.0	0.0	k__Bacteria; p__Bacteroidetes; c__Bacteroidia; o__Bacteroidales; f__Rikenellaceae; g__Alistipes; s__Alistipes_indistinctus
otu1231	0.0	10.0	0.0	0.0	0.0	0.0	0.0	0.0	k__Bacteria; p__Firmicutes; c__Clostridia; o__Clostridiales; f__Ruminococcaceae; g__Unclassified_Ruminococcaceae; s__Unclassified_Ruminococcaceae
otu1307	10.0	0.0	0.0	0.0	0.0	0.0	0.0	0.0	k__Bacteria; p__Nitrospirae; c__Nitrospira; o__Nitrospirales; f__Unclassified_Nitrospirales; g__Unclassified_Nitrospirales; s__Unclassified_Nitrospirales
otu1347	0.0	0.0	0.0	0.0	0.0	10.0	0.0	0.0	k__Bacteria; p__Firmicutes; c__Clostridia; o__Clostridiales; f__Ruminococcaceae; g__Unclassified_Ruminococcaceae; s__Unclassified_Ruminococcaceae
otu1427	1.0	9.0	0.0	0.0	0.0	0.0	0.0	0.0	k__Bacteria; p__Firmicutes; c__Bacilli; o__Lactobacillales; f__Lactobacillaceae; g__Lactobacillus; s__Unclassified_Lactobacillus
otu1496	0.0	0.0	0.0	10.0	0.0	0.0	0.0	0.0	k__Bacteria; p__Firmicutes; c__Clostridia; o__Clostridiales; f__Lachnospiraceae; g__Unclassified_Lachnospiraceae; s__Unclassified_Lachnospiraceae
otu1519	0.0	10.0	0.0	0.0	0.0	0.0	0.0	0.0	k__Bacteria; p__Firmicutes; c__Bacilli; o__Lactobacillales; f__Lactobacillaceae; g__Lactobacillus; s__Unclassified_Lactobacillus
otu1529	0.0	0.0	0.0	0.0	0.0	10.0	0.0	0.0	k__Bacteria; p__Firmicutes; c__Clostridia; o__Clostridiales; f__Ruminococcaceae; g__Ruminococcus; s__Unclassified_Ruminococcus
otu1758	0.0	0.0	0.0	9.0	0.0	1.0	0.0	0.0	k__Bacteria; p__Firmicutes; c__Clostridia; o__Clostridiales; f__Unclassified_Clostridiales; g__Unclassified_Clostridiales; s__Unclassified_Clostridiales
otu1761	0.0	10.0	0.0	0.0	0.0	0.0	0.0	0.0	k__Bacteria; p__Firmicutes; c__Clostridia; o__Clostridiales; f__Clostridiaceae; g__Unclassified_Clostridiaceae; s__Unclassified_Clostridiaceae
otu1829	0.0	10.0	0.0	0.0	0.0	0.0	0.0	0.0	k__Bacteria; p__Firmicutes; c__Clostridia; o__Clostridiales; f__Ruminococcaceae; g__Unclassified_Ruminococcaceae; s__Unclassified_Ruminococcaceae
otu1881	0.0	0.0	0.0	0.0	0.0	10.0	0.0	0.0	k__Bacteria; p__Proteobacteria; c__Gammaproteobacteria; o__Enterobacteriales; f__Enterobacteriaceae; g__Unclassified_Enterobacteriaceae; s__Unclassified_Enterobacteriaceae
otu1911	0.0	0.0	0.0	0.0	0.0	0.0	0.0	10.0	k__Bacteria; p__Bacteroidetes; c__Bacteroidia; o__Bacteroidales; f__Bacteroidaceae; g__Bacteroides; s__Bacteroides_fragilis
otu2069	0.0	0.0	0.0	0.0	0.0	10.0	0.0	0.0	k__Bacteria; p__Firmicutes; c__Clostridia; o__Clostridiales; f__Lachnospiraceae; g__Roseburia; s__Roseburia_faecis
otu2150	0.0	10.0	0.0	0.0	0.0	0.0	0.0	0.0	k__Bacteria; p__Firmicutes; c__Clostridia; o__Clostridiales; f__Ruminococcaceae; g__Ruminococcus; s__Unclassified_Ruminococcus
otu2358	2.0	0.0	0.0	0.0	0.0	2.0	0.0	6.0	k__Bacteria; p__Bacteroidetes; c__Bacteroidia; o__Bacteroidales; f__Bacteroidaceae; g__Bacteroides; s__Unclassified_Bacteroides
otu2381	0.0	0.0	0.0	8.0	0.0	2.0	0.0	0.0	k__Bacteria; p__Firmicutes; c__Clostridia; o__Clostridiales; f__Unclassified_Clostridiales; g__Unclassified_Clostridiales; s__Unclassified_Clostridiales
otu2454	2.0	8.0	0.0	0.0	0.0	0.0	0.0	0.0	k__Bacteria; p__Bacteroidetes; c__Bacteroidia; o__Bacteroidales; f__Prevotellaceae; g__Prevotella; s__Unclassified_Prevotella
otu2471	0.0	0.0	0.0	10.0	0.0	0.0	0.0	0.0	k__Bacteria; p__Firmicutes; c__Clostridia; o__Clostridiales; f__Veillonellaceae; g__Megamonas; s__Unclassified_Megamonas
otu2611	0.0	0.0	0.0	0.0	0.0	0.0	10.0	0.0	k__Bacteria; p__Bacteroidetes; c__Bacteroidia; o__Bacteroidales; f__Bacteroidaceae; g__Bacteroides; s__Unclassified_Bacteroides
otu2683	0.0	0.0	0.0	9.0	0.0	0.0	1.0	0.0	k__Bacteria; p__Firmicutes; c__Clostridia; o__Clostridiales; f__Unclassified_Clostridiales; g__Unclassified_Clostridiales; s__Unclassified_Clostridiales
otu2997	0.0	0.0	0.0	9.0	0.0	1.0	0.0	0.0	k__Bacteria; p__Bacteroidetes; c__Bacteroidia; o__Bacteroidales; f__Bacteroidaceae; g__Bacteroides; s__Bacteroides_uniformis
otu3091	0.0	4.0	0.0	2.0	1.0	0.0	3.0	0.0	k__Bacteria; p__Firmicutes; c__Clostridia; o__Clostridiales; f__Lachnospiraceae; g__Unclassified_Lachnospiraceae; s__Unclassified_Lachnospiraceae
otu3300	2.0	0.0	0.0	0.0	0.0	0.0	8.0	0.0	k__Bacteria; p__Actinobacteria; c__Actinobacteria; o__Bifidobacteriales; f__Bifidobacteriaceae; g__Bifidobacterium; s__Unclassified_Bifidobacterium
otu3445	9.0	1.0	0.0	0.0	0.0	0.0	0.0	0.0	k__Bacteria; p__Bacteroidetes; c__Sphingobacteriia; o__Sphingobacteriales; f__Sphingobacteriaceae; g__Sphingobacterium; s__Unclassified_Sphingobacterium
otu3542	10.0	0.0	0.0	0.0	0.0	0.0	0.0	0.0	k__Bacteria; p__Firmicutes; c__Erysipelotrichi; o__Erysipelotrichales; f__Erysipelotrichaceae; g__Coprobacillus; s__Unclassified_Coprobacillus
otu3745	6.0	4.0	0.0	0.0	0.0	0.0	0.0	0.0	k__Bacteria; p__Proteobacteria; c__Alphaproteobacteria; o__Rhizobiales; f__Rhizobiaceae; g__Agrobacterium; s__Unclassified_Agrobacterium
otu3795	0.0	0.0	0.0	0.0	0.0	10.0	0.0	0.0	k__Bacteria; p__Firmicutes; c__Clostridia; o__Clostridiales; f__Ruminococcaceae; g__Faecalibacterium; s__Faecalibacterium_prausnitzii
otu3841	6.0	4.0	0.0	0.0	0.0	0.0	0.0	0.0	k__Bacteria; p__Firmicutes; c__Bacilli; o__Lactobacillales; f__Lactobacillaceae; g__Lactobacillus; s__Unclassified_Lactobacillus
otu3920	0.0	0.0	0.0	0.0	0.0	0.0	10.0	0.0	k__Bacteria; p__Bacteroidetes; c__Bacteroidia; o__Bacteroidales; f__Bacteroidaceae; g__Bacteroides; s__Unclassified_Bacteroides
otu3962	0.0	0.0	0.0	10.0	0.0	0.0	0.0	0.0	k__Bacteria; p__Firmicutes; c__Clostridia; o__Clostridiales; f__Lachnospiraceae; g__Unclassified_Lachnospiraceae; s__Unclassified_Lachnospiraceae
otu3968	3.0	7.0	0.0	0.0	0.0	0.0	0.0	0.0	k__Bacteria; p__Proteobacteria; c__Alphaproteobacteria; o__Sphingomonadales; f__Sphingomonadaceae; g__Unclassified_Sphingomonadaceae; s__Unclassified_Sphingomonadaceae
otu4399	0.0	0.0	0.0	0.0	10.0	0.0	0.0	0.0	k__Bacteria; p__Proteobacteria; c__Gammaproteobacteria; o__Enterobacteriales; f__Enterobacteriaceae; g__Klebsiella; s__Unclassified_Klebsiella
otu4560	1.0	9.0	0.0	0.0	0.0	0.0	0.0	0.0	k__Bacteria; p__Firmicutes; c__Clostridia; o__Clostridiales; f__Unclassified_Clostridiales; g__Unclassified_Clostridiales; s__Unclassified_Clostridiales
otu4822	0.0	0.0	0.0	8.0	0.0	1.0	1.0	0.0	k__Bacteria; p__Firmicutes; c__Clostridia; o__Clostridiales; f__Lachnospiraceae; g__Unclassified_Lachnospiraceae; s__Unclassified_Lachnospiraceae
otu4842	0.0	10.0	0.0	0.0	0.0	0.0	0.0	0.0	k__Bacteria; p__Proteobacteria; c__Alphaproteobacteria; o__Rhodospirillales; f__Acetobacteraceae; g__Acetobacter; s__Unclassified_Acetobacter
otu4918	0.0	0.0	0.0	10.0	0.0	0.0	0.0	0.0	k__Bacteria; p__Bacteroidetes; c__Bacteroidia; o__Bacteroidales; f__Bacteroidaceae; g__Bacteroides; s__Unclassified_Bacteroides
otu4952	10.0	0.0	0.0	0.0	0.0	0.0	0.0	0.0	k__Bacteria; p__Firmicutes; c__Clostridia; o__Clostridiales; f__Veillonellaceae; g__Megasphaera; s__Unclassified_Megasphaera
otu5036	0.0	10.0	0.0	0.0	0.0	0.0	0.0	0.0	k__Bacteria; p__Firmicutes; c__Clostridia; o__Clostridiales; f__Unclassified_Clostridiales; g__Unclassified_Clostridiales; s__Unclassified_Clostridiales
otu5151	0.0	10.0	0.0	0.0	0.0	0.0	0.0	0.0	k__Bacteria; p__Firmicutes; c__Clostridia; o__Clostridiales; f__Ruminococcaceae; g__Unclassified_Ruminococcaceae; s__Unclassified_Ruminococcaceae
otu5201	0.0	10.0	0.0	0.0	0.0	0.0	0.0	0.0	k__Bacteria; p__Chloroflexi; c__Anaerolineae; o__GCA004; f__Unclassified_GCA004; g__Unclassified_GCA004; s__Unclassified_GCA004
otu5225	0.0	0.0	0.0	10.0	0.0	0.0	0.0	0.0	k__Bacteria; p__Firmicutes; c__Clostridia; o__Clostridiales; f__Lachnospiraceae; g__Unclassified_Lachnospiraceae; s__Unclassified_Lachnospiraceae
otu5337	10.0	0.0	0.0	0.0	0.0	0.0	0.0	0.0	k__Bacteria; p__Firmicutes; c__Clostridia; o__Clostridiales; f__Ruminococcaceae; g__Ruminococcus; s__Unclassified_Ruminococcus
otu5427	0.0	0.0	0.0	0.0	0.0	0.0	0.0	10.0	k__Bacteria; p__Firmicutes; c__Bacilli; o__Lactobacillales; f__Unclassified_Lactobacillales; g__Unclassified_Lactobacillales; s__Unclassified_Lactobacillales
otu5499	10.0	0.0	0.0	0.0	0.0	0.0	0.0	0.0	k__Bacteria; p__Chloroflexi; c__Anaerolineae; o__GCA004; f__Unclassified_GCA004; g__Unclassified_GCA004; s__Unclassified_GCA004
otu5517	10.0	0.0	0.0	0.0	0.0	0.0	0.0	0.0	k__Bacteria; p__Firmicutes; c__Clostridia; o__Clostridiales; f__Ruminococcaceae; g__Ruminococcus; s__Ruminococcus_bromii
otu5621	0.0	0.0	0.0	10.0	0.0	0.0	0.0	0.0	k__Bacteria; p__Firmicutes; c__Clostridia; o__Clostridiales; f__Veillonellaceae; g__Megamonas; s__Unclassified_Megamonas
otu5670	0.0	0.0	0.0	10.0	0.0	0.0	0.0	0.0	k__Bacteria; p__Bacteroidetes; c__Bacteroidia; o__Bacteroidales; f__Bacteroidaceae; g__Bacteroides; s__Unclassified_Bacteroides
otu5681	3.0	0.0	0.0	1.0	0.0	6.0	0.0	0.0	k__Bacteria; p__Bacteroidetes; c__Bacteroidia; o__Bacteroidales; f__Bacteroidaceae; g__Bacteroides; s__Unclassified_Bacteroides
otu5693	4.0	0.0	0.0	1.0	0.0	4.0	1.0	0.0	k__Bacteria; p__Firmicutes; c__Clostridia; o__Clostridiales; f__Lachnospiraceae; g__Roseburia; s__Unclassified_Roseburia
otu5712	0.0	10.0	0.0	0.0	0.0	0.0	0.0	0.0	k__Bacteria; p__Firmicutes; c__Clostridia; o__Clostridiales; f__Ruminococcaceae; g__Unclassified_Ruminococcaceae; s__Unclassified_Ruminococcaceae
otu5755	4.0	6.0	0.0	0.0	0.0	0.0	0.0	0.0	k__Bacteria; p__Firmicutes; c__Bacilli; o__Lactobacillales; f__Lactobacillaceae; g__Lactobacillus; s__Unclassified_Lactobacillus
otu5883	3.0	7.0	0.0	0.0	0.0	0.0	0.0	0.0	k__Bacteria; p__Firmicutes; c__Bacilli; o__Lactobacillales; f__Lactobacillaceae; g__Lactobacillus; s__Unclassified_Lactobacillus
otu5931	10.0	0.0	0.0	0.0	0.0	0.0	0.0	0.0	k__Bacteria; p__Firmicutes; c__Clostridia; o__Clostridiales; f__Ruminococcaceae; g__Unclassified_Ruminococcaceae; s__Unclassified_Ruminococcaceae
otu5954	0.0	10.0	0.0	0.0	0.0	0.0	0.0	0.0	k__Bacteria; p__Bacteroidetes; c__Bacteroidia; o__Bacteroidales; f__Prevotellaceae; g__Prevotella; s__Unclassified_Prevotella
otu6012	0.0	0.0	0.0	5.0	0.0	0.0	5.0	0.0	k__Bacteria; p__Bacteroidetes; c__Bacteroidia; o__Bacteroidales; f__Bacteroidaceae; g__Bacteroides; s__Unclassified_Bacteroides
otu6053	0.0	0.0	0.0	9.0	0.0	1.0	0.0	0.0	k__Bacteria; p__Bacteroidetes; c__Bacteroidia; o__Bacteroidales; f__Rikenellaceae; g__Unclassified_Rikenellaceae; s__Unclassified_Rikenellaceae
otu6216	0.0	10.0	0.0	0.0	0.0	0.0	0.0	0.0	k__Bacteria; p__Proteobacteria; c__Gammaproteobacteria; o__Enterobacteriales; f__Enterobacteriaceae; g__Unclassified_Enterobacteriaceae; s__Unclassified_Enterobacteriaceae
otu6221	10.0	0.0	0.0	0.0	0.0	0.0	0.0	0.0	k__Bacteria; p__Firmicutes; c__Bacilli; o__Lactobacillales; f__Unclassified_Lactobacillales; g__Unclassified_Lactobacillales; s__Unclassified_Lactobacillales
otu6394	0.0	10.0	0.0	0.0	0.0	0.0	0.0	0.0	k__Bacteria; p__Proteobacteria; c__Alphaproteobacteria; o__Rhizobiales; f__Rhizobiaceae; g__Agrobacterium; s__Unclassified_Agrobacterium
otu6410	0.0	0.0	0.0	3.0	6.0	1.0	0.0	0.0	k__Bacteria; p__Firmicutes; c__Clostridia; o__Clostridiales; f__Ruminococcaceae; g__Unclassified_Ruminococcaceae; s__Unclassified_Ruminococcaceae
otu6413	0.0	0.0	0.0	0.0	0.0	1.0	9.0	0.0	k__Bacteria; p__Proteobacteria; c__Gammaproteobacteria; o__Enterobacteriales; f__Enterobacteriaceae; g__Unclassified_Enterobacteriaceae; s__Unclassified_Enterobacteriaceae
otu6590	0.0	10.0	0.0	0.0	0.0	0.0	0.0	0.0	k__Bacteria; p__Actinobacteria; c__Actinobacteria; o__Actinomycetales; f__Dermabacteraceae; g__Brachybacterium; s__Unclassified_Brachybacterium
otu6717	10.0	0.0	0.0	0.0	0.0	0.0	0.0	0.0	k__Bacteria; p__Firmicutes; c__Clostridia; o__Clostridiales; f__Unclassified_Clostridiales; g__Unclassified_Clostridiales; s__Unclassified_Clostridiales
otu6952	0.0	10.0	0.0	0.0	0.0	0.0	0.0	0.0	k__Bacteria; p__Firmicutes; c__Bacilli; o__Lactobacillales; f__Lactobacillaceae; g__Lactobacillus; s__Unclassified_Lactobacillus
otu6988	0.0	0.0	0.0	7.0	0.0	1.0	1.0	1.0	k__Bacteria; p__Firmicutes; c__Clostridia; o__Clostridiales; f__Lachnospiraceae; g__[Ruminococcus]; s__[Ruminococcus]_gnavus
otu7047	2.0	8.0	0.0	0.0	0.0	0.0	0.0	0.0	k__Bacteria; p__Bacteroidetes; c__[Saprospirae]; o__[Saprospirales]; f__Chitinophagaceae; g__Unclassified_Chitinophagaceae; s__Unclassified_Chitinophagaceae
otu7414	0.0	0.0	0.0	0.0	0.0	0.0	0.0	10.0	k__Bacteria; p__Firmicutes; c__Erysipelotrichi; o__Erysipelotrichales; f__Erysipelotrichaceae; g__Unclassified_Erysipelotrichaceae; s__Unclassified_Erysipelotrichaceae
otu7432	0.0	10.0	0.0	0.0	0.0	0.0	0.0	0.0	k__Bacteria; p__Acidobacteria; c__Acidobacteria-6; o__iii1-15; f__Unclassified_iii1-15; g__Unclassified_iii1-15; s__Unclassified_iii1-15
otu7450	0.0	10.0	0.0	0.0	0.0	0.0	0.0	0.0	k__Bacteria; p__Firmicutes; c__Bacilli; o__Lactobacillales; f__Lactobacillaceae; g__Lactobacillus; s__Unclassified_Lactobacillus
otu7540	0.0	10.0	0.0	0.0	0.0	0.0	0.0	0.0	k__Bacteria; p__Firmicutes; c__Clostridia; o__Clostridiales; f__Unclassified_Clostridiales; g__Unclassified_Clostridiales; s__Unclassified_Clostridiales
otu7581	0.0	0.0	0.0	0.0	0.0	10.0	0.0	0.0	k__Bacteria; p__Firmicutes; c__Clostridia; o__Clostridiales; f__Lachnospiraceae; g__Lachnobacterium; s__Unclassified_Lachnobacterium
otu7785	0.0	10.0	0.0	0.0	0.0	0.0	0.0	0.0	k__Bacteria; p__Firmicutes; c__Clostridia; o__Clostridiales; f__Unclassified_Clostridiales; g__Unclassified_Clostridiales; s__Unclassified_Clostridiales
otu82	0.0	0.0	0.0	0.0	9.0	0.0	0.0	0.0	k__Bacteria; p__Proteobacteria; c__Gammaproteobacteria; o__Enterobacteriales; f__Enterobacteriaceae; g__Unclassified_Enterobacteriaceae; s__Unclassified_Enterobacteriaceae
otu128	0.0	0.0	9.0	0.0	0.0	0.0	0.0	0.0	k__Bacteria; p__Bacteroidetes; c__Bacteroidia; o__Bacteroidales; f__Bacteroidaceae; g__Bacteroides; s__Unclassified_Bacteroides
otu151	0.0	0.0	0.0	9.0	0.0	0.0	0.0	0.0	k__Bacteria; p__Firmicutes; c__Clostridia; o__Clostridiales; f__Lachnospiraceae; g__[Ruminococcus]; s__[Ruminococcus]_gnavus
otu168	0.0	0.0	0.0	9.0	0.0	0.0	0.0	0.0	k__Bacteria; p__Bacteroidetes; c__Bacteroidia; o__Bacteroidales; f__Bacteroidaceae; g__Bacteroides; s__Unclassified_Bacteroides
otu243	0.0	0.0	0.0	0.0	0.0	3.0	0.0	6.0	k__Bacteria; p__Bacteroidetes; c__Bacteroidia; o__Bacteroidales; f__Bacteroidaceae; g__Bacteroides; s__Unclassified_Bacteroides
otu246	0.0	0.0	0.0	9.0	0.0	0.0	0.0	0.0	k__Bacteria; p__Firmicutes; c__Clostridia; o__Clostridiales; f__Lachnospiraceae; g__[Ruminococcus]; s__[Ruminococcus]_gnavus
otu253	0.0	0.0	0.0	4.0	2.0	1.0	2.0	0.0	k__Bacteria; p__Firmicutes; c__Clostridia; o__Clostridiales; f__Ruminococcaceae; g__Unclassified_Ruminococcaceae; s__Unclassified_Ruminococcaceae
otu346	0.0	0.0	0.0	5.0	0.0	4.0	0.0	0.0	k__Bacteria; p__Bacteroidetes; c__Bacteroidia; o__Bacteroidales; f__Bacteroidaceae; g__Bacteroides; s__Unclassified_Bacteroides
otu440	0.0	9.0	0.0	0.0	0.0	0.0	0.0	0.0	k__Bacteria; p__Bacteroidetes; c__Bacteroidia; o__Bacteroidales; f__Rikenellaceae; g__Unclassified_Rikenellaceae; s__Unclassified_Rikenellaceae
otu443	0.0	9.0	0.0	0.0	0.0	0.0	0.0	0.0	k__Bacteria; p__Firmicutes; c__Clostridia; o__Clostridiales; f__Clostridiaceae; g__Clostridium; s__Unclassified_Clostridium
otu548	0.0	0.0	0.0	1.0	0.0	8.0	0.0	0.0	k__Bacteria; p__Bacteroidetes; c__Bacteroidia; o__Bacteroidales; f__Bacteroidaceae; g__Bacteroides; s__Bacteroides_uniformis
otu647	0.0	0.0	0.0	0.0	0.0	0.0	1.0	8.0	k__Bacteria; p__Firmicutes; c__Bacilli; o__Lactobacillales; f__Unclassified_Lactobacillales; g__Unclassified_Lactobacillales; s__Unclassified_Lactobacillales
otu722	0.0	9.0	0.0	0.0	0.0	0.0	0.0	0.0	k__Bacteria; p__Firmicutes; c__Clostridia; o__Clostridiales; f__Clostridiaceae; g__Clostridium; s__Unclassified_Clostridium
otu1162	0.0	0.0	0.0	0.0	0.0	9.0	0.0	0.0	k__Bacteria; p__Firmicutes; c__Clostridia; o__Clostridiales; f__Ruminococcaceae; g__Ruminococcus; s__Unclassified_Ruminococcus
otu1176	5.0	4.0	0.0	0.0	0.0	0.0	0.0	0.0	k__Bacteria; p__Actinobacteria; c__Actinobacteria; o__Actinomycetales; f__Microbacteriaceae; g__Microbacterium; s__Unclassified_Microbacterium
otu1308	0.0	9.0	0.0	0.0	0.0	0.0	0.0	0.0	k__Bacteria; p__Firmicutes; c__Bacilli; o__Lactobacillales; f__Lactobacillaceae; g__Lactobacillus; s__Unclassified_Lactobacillus
otu1401	0.0	0.0	0.0	0.0	0.0	0.0	9.0	0.0	k__Bacteria; p__Firmicutes; c__Bacilli; o__Lactobacillales; f__Enterococcaceae; g__Enterococcus; s__Unclassified_Enterococcus
otu1550	0.0	0.0	0.0	9.0	0.0	0.0	0.0	0.0	k__Bacteria; p__Firmicutes; c__Clostridia; o__Clostridiales; f__Veillonellaceae; g__Megamonas; s__Unclassified_Megamonas
otu1639	7.0	2.0	0.0	0.0	0.0	0.0	0.0	0.0	k__Bacteria; p__Bacteroidetes; c__Bacteroidia; o__Bacteroidales; f__S24-7; g__Unclassified_S24-7; s__Unclassified_S24-7
otu1656	0.0	9.0	0.0	0.0	0.0	0.0	0.0	0.0	k__Bacteria; p__Bacteroidetes; c__Bacteroidia; o__Bacteroidales; f__Rikenellaceae; g__Unclassified_Rikenellaceae; s__Unclassified_Rikenellaceae
otu1673	0.0	0.0	0.0	0.0	1.0	0.0	8.0	0.0	k__Bacteria; p__Firmicutes; c__Clostridia; o__Clostridiales; f__Peptostreptococcaceae; g__[Clostridium]; s__[Clostridium]_difficile
otu1728	0.0	1.0	0.0	0.0	0.0	1.0	7.0	0.0	k__Bacteria; p__Proteobacteria; c__Gammaproteobacteria; o__Enterobacteriales; f__Enterobacteriaceae; g__Unclassified_Enterobacteriaceae; s__Unclassified_Enterobacteriaceae
otu1910	0.0	0.0	0.0	0.0	0.0	9.0	0.0	0.0	k__Bacteria; p__Firmicutes; c__Clostridia; o__Clostridiales; f__Ruminococcaceae; g__Unclassified_Ruminococcaceae; s__Unclassified_Ruminococcaceae
otu1921	0.0	9.0	0.0	0.0	0.0	0.0	0.0	0.0	k__Bacteria; p__Firmicutes; c__Clostridia; o__Clostridiales; f__Unclassified_Clostridiales; g__Unclassified_Clostridiales; s__Unclassified_Clostridiales
otu1938	0.0	0.0	0.0	0.0	0.0	1.0	8.0	0.0	k__Bacteria; p__Actinobacteria; c__Actinobacteria; o__Bifidobacteriales; f__Bifidobacteriaceae; g__Bifidobacterium; s__Unclassified_Bifidobacterium
otu2064	0.0	0.0	0.0	6.0	0.0	2.0	1.0	0.0	k__Bacteria; p__Firmicutes; c__Clostridia; o__Clostridiales; f__Lachnospiraceae; g__Unclassified_Lachnospiraceae; s__Unclassified_Lachnospiraceae
otu2241	0.0	9.0	0.0	0.0	0.0	0.0	0.0	0.0	k__Bacteria; p__Firmicutes; c__Clostridia; o__Clostridiales; f__Unclassified_Clostridiales; g__Unclassified_Clostridiales; s__Unclassified_Clostridiales
otu2311	0.0	0.0	0.0	9.0	0.0	0.0	0.0	0.0	k__Bacteria; p__Bacteroidetes; c__Bacteroidia; o__Bacteroidales; f__Bacteroidaceae; g__Bacteroides; s__Unclassified_Bacteroides
otu2355	0.0	0.0	0.0	0.0	9.0	0.0	0.0	0.0	k__Bacteria; p__Proteobacteria; c__Gammaproteobacteria; o__Enterobacteriales; f__Enterobacteriaceae; g__Unclassified_Enterobacteriaceae; s__Unclassified_Enterobacteriaceae
otu2470	9.0	0.0	0.0	0.0	0.0	0.0	0.0	0.0	k__Bacteria; p__Firmicutes; c__Clostridia; o__Clostridiales; f__Ruminococcaceae; g__Unclassified_Ruminococcaceae; s__Unclassified_Ruminococcaceae
otu2479	9.0	0.0	0.0	0.0	0.0	0.0	0.0	0.0	k__Bacteria; p__Firmicutes; c__Clostridia; o__Clostridiales; f__Lachnospiraceae; g__Roseburia; s__Roseburia_faecis
otu2640	0.0	0.0	0.0	1.0	6.0	0.0	2.0	0.0	k__Bacteria; p__Firmicutes; c__Erysipelotrichi; o__Erysipelotrichales; f__Erysipelotrichaceae; g__Unclassified_Erysipelotrichaceae; s__Unclassified_Erysipelotrichaceae
otu2709	0.0	0.0	0.0	0.0	9.0	0.0	0.0	0.0	k__Bacteria; p__Firmicutes; c__Erysipelotrichi; o__Erysipelotrichales; f__Erysipelotrichaceae; g__Unclassified_Erysipelotrichaceae; s__Unclassified_Erysipelotrichaceae
otu2715	2.0	6.0	1.0	0.0	0.0	0.0	0.0	0.0	k__Bacteria; p__Nitrospirae; c__Nitrospira; o__Nitrospirales; f__Nitrospiraceae; g__Nitrospira; s__Unclassified_Nitrospira
otu2719	0.0	0.0	0.0	2.0	0.0	7.0	0.0	0.0	k__Bacteria; p__Bacteroidetes; c__Bacteroidia; o__Bacteroidales; f__Bacteroidaceae; g__Bacteroides; s__Unclassified_Bacteroides
otu2787	1.0	0.0	0.0	2.0	0.0	0.0	6.0	0.0	k__Bacteria; p__Actinobacteria; c__Actinobacteria; o__Actinomycetales; f__Actinomycetaceae; g__Actinomyces; s__Unclassified_Actinomyces
otu2844	0.0	0.0	0.0	0.0	0.0	9.0	0.0	0.0	k__Bacteria; p__Firmicutes; c__Clostridia; o__Clostridiales; f__Ruminococcaceae; g__Unclassified_Ruminococcaceae; s__Unclassified_Ruminococcaceae
otu2850	0.0	0.0	0.0	0.0	0.0	9.0	0.0	0.0	k__Bacteria; p__Bacteroidetes; c__Bacteroidia; o__Bacteroidales; f__Bacteroidaceae; g__Bacteroides; s__Unclassified_Bacteroides
otu2924	0.0	9.0	0.0	0.0	0.0	0.0	0.0	0.0	k__Bacteria; p__Synergistetes; c__Synergistia; o__Synergistales; f__Dethiosulfovibrionaceae; g__Aminobacterium; s__Unclassified_Aminobacterium
otu2933	3.0	0.0	5.0	0.0	0.0	0.0	0.0	1.0	k__Bacteria; p__Proteobacteria; c__Gammaproteobacteria; o__Pseudomonadales; f__Pseudomonadaceae; g__Pseudomonas; s__Pseudomonas_stutzeri
otu3062	0.0	8.0	1.0	0.0	0.0	0.0	0.0	0.0	k__Bacteria; p__Firmicutes; c__Clostridia; o__Clostridiales; f__Unclassified_Clostridiales; g__Unclassified_Clostridiales; s__Unclassified_Clostridiales
otu3085	0.0	9.0	0.0	0.0	0.0	0.0	0.0	0.0	k__Bacteria; p__Firmicutes; c__Clostridia; o__Clostridiales; f__Unclassified_Clostridiales; g__Unclassified_Clostridiales; s__Unclassified_Clostridiales
otu3123	0.0	0.0	0.0	5.0	0.0	2.0	2.0	0.0	k__Bacteria; p__Bacteroidetes; c__Bacteroidia; o__Bacteroidales; f__Bacteroidaceae; g__Bacteroides; s__Unclassified_Bacteroides
otu3173	0.0	0.0	0.0	9.0	0.0	0.0	0.0	0.0	k__Bacteria; p__Firmicutes; c__Clostridia; o__Clostridiales; f__Lachnospiraceae; g__Unclassified_Lachnospiraceae; s__Unclassified_Lachnospiraceae
otu3255	0.0	0.0	0.0	0.0	5.0	0.0	0.0	4.0	k__Bacteria; p__Firmicutes; c__Clostridia; o__Clostridiales; f__Ruminococcaceae; g__Faecalibacterium; s__Faecalibacterium_prausnitzii
otu3304	0.0	9.0	0.0	0.0	0.0	0.0	0.0	0.0	k__Bacteria; p__Firmicutes; c__Clostridia; o__Clostridiales; f__Ruminococcaceae; g__Ruminococcus; s__Unclassified_Ruminococcus
otu3349	0.0	0.0	0.0	3.0	0.0	0.0	6.0	0.0	k__Bacteria; p__Bacteroidetes; c__Bacteroidia; o__Bacteroidales; f__Bacteroidaceae; g__Bacteroides; s__Unclassified_Bacteroides
otu3352	0.0	9.0	0.0	0.0	0.0	0.0	0.0	0.0	k__Bacteria; p__Bacteroidetes; c__Bacteroidia; o__Bacteroidales; f__S24-7; g__Unclassified_S24-7; s__Unclassified_S24-7
otu3378	0.0	9.0	0.0	0.0	0.0	0.0	0.0	0.0	k__Bacteria; p__Firmicutes; c__Clostridia; o__Clostridiales; f__Unclassified_Clostridiales; g__Unclassified_Clostridiales; s__Unclassified_Clostridiales
otu3456	0.0	0.0	8.0	0.0	0.0	0.0	0.0	1.0	k__Bacteria; p__Firmicutes; c__Clostridia; o__Clostridiales; f__Clostridiaceae; g__Clostridium; s__Unclassified_Clostridium
otu3490	0.0	9.0	0.0	0.0	0.0	0.0	0.0	0.0	k__Bacteria; p__Firmicutes; c__Clostridia; o__Clostridiales; f__Peptostreptococcaceae; g__Unclassified_Peptostreptococcaceae; s__Unclassified_Peptostreptococcaceae
otu3541	0.0	0.0	0.0	0.0	0.0	3.0	6.0	0.0	k__Bacteria; p__Proteobacteria; c__Betaproteobacteria; o__Burkholderiales; f__Burkholderiaceae; g__Burkholderia; s__Unclassified_Burkholderia
otu3644	0.0	0.0	0.0	9.0	0.0	0.0	0.0	0.0	k__Bacteria; p__Bacteroidetes; c__Bacteroidia; o__Bacteroidales; f__Bacteroidaceae; g__Bacteroides; s__Unclassified_Bacteroides
otu3675	0.0	0.0	0.0	0.0	0.0	0.0	0.0	9.0	k__Bacteria; p__Bacteroidetes; c__Bacteroidia; o__Bacteroidales; f__Bacteroidaceae; g__Bacteroides; s__Bacteroides_fragilis
otu3760	9.0	0.0	0.0	0.0	0.0	0.0	0.0	0.0	k__Bacteria; p__WPS-2; c__Unclassified_WPS-2; o__Unclassified_WPS-2; f__Unclassified_WPS-2; g__Unclassified_WPS-2; s__Unclassified_WPS-2
otu3854	0.0	0.0	0.0	0.0	0.0	0.0	9.0	0.0	k__Bacteria; p__Firmicutes; c__Clostridia; o__Clostridiales; f__Veillonellaceae; g__Veillonella; s__Veillonella_dispar
otu3873	0.0	0.0	0.0	0.0	0.0	0.0	9.0	0.0	k__Bacteria; p__Firmicutes; c__Bacilli; o__Lactobacillales; f__Enterococcaceae; g__Unclassified_Enterococcaceae; s__Unclassified_Enterococcaceae
otu4136	0.0	0.0	0.0	0.0	0.0	0.0	9.0	0.0	k__Bacteria; p__Bacteroidetes; c__Bacteroidia; o__Bacteroidales; f__Bacteroidaceae; g__Bacteroides; s__Unclassified_Bacteroides
otu4372	8.0	1.0	0.0	0.0	0.0	0.0	0.0	0.0	k__Bacteria; p__Proteobacteria; c__Deltaproteobacteria; o__MIZ46; f__Unclassified_MIZ46; g__Unclassified_MIZ46; s__Unclassified_MIZ46
otu4389	0.0	9.0	0.0	0.0	0.0	0.0	0.0	0.0	k__Bacteria; p__Firmicutes; c__Clostridia; o__Clostridiales; f__Lachnospiraceae; g__Blautia; s__Unclassified_Blautia
otu4413	0.0	9.0	0.0	0.0	0.0	0.0	0.0	0.0	k__Bacteria; p__Firmicutes; c__Clostridia; o__Clostridiales; f__Unclassified_Clostridiales; g__Unclassified_Clostridiales; s__Unclassified_Clostridiales
otu4488	0.0	0.0	0.0	0.0	9.0	0.0	0.0	0.0	k__Bacteria; p__Proteobacteria; c__Gammaproteobacteria; o__Enterobacteriales; f__Enterobacteriaceae; g__Klebsiella; s__Unclassified_Klebsiella
otu4514	0.0	0.0	9.0	0.0	0.0	0.0	0.0	0.0	k__Bacteria; p__Bacteroidetes; c__Bacteroidia; o__Bacteroidales; f__Bacteroidaceae; g__Bacteroides; s__Unclassified_Bacteroides
otu4800	5.0	4.0	0.0	0.0	0.0	0.0	0.0	0.0	k__Bacteria; p__Firmicutes; c__Clostridia; o__Clostridiales; f__Lachnospiraceae; g__Blautia; s__Blautia_producta
otu4828	0.0	9.0	0.0	0.0	0.0	0.0	0.0	0.0	k__Bacteria; p__Firmicutes; c__Clostridia; o__Clostridiales; f__Unclassified_Clostridiales; g__Unclassified_Clostridiales; s__Unclassified_Clostridiales
otu4830	9.0	0.0	0.0	0.0	0.0	0.0	0.0	0.0	k__Bacteria; p__GAL15; c__Unclassified_GAL15; o__Unclassified_GAL15; f__Unclassified_GAL15; g__Unclassified_GAL15; s__Unclassified_GAL15
otu4867	0.0	0.0	0.0	0.0	0.0	9.0	0.0	0.0	k__Bacteria; p__Firmicutes; c__Clostridia; o__Clostridiales; f__Ruminococcaceae; g__Unclassified_Ruminococcaceae; s__Unclassified_Ruminococcaceae
otu4892	0.0	0.0	0.0	0.0	9.0	0.0	0.0	0.0	k__Bacteria; p__Proteobacteria; c__Gammaproteobacteria; o__Enterobacteriales; f__Enterobacteriaceae; g__Unclassified_Enterobacteriaceae; s__Unclassified_Enterobacteriaceae
otu4937	0.0	0.0	0.0	7.0	0.0	0.0	2.0	0.0	k__Bacteria; p__Bacteroidetes; c__Bacteroidia; o__Bacteroidales; f__Bacteroidaceae; g__Bacteroides; s__Unclassified_Bacteroides
otu4975	0.0	9.0	0.0	0.0	0.0	0.0	0.0	0.0	k__Bacteria; p__Firmicutes; c__Clostridia; o__SHA-98; f__Unclassified_SHA-98; g__Unclassified_SHA-98; s__Unclassified_SHA-98
otu5043	3.0	6.0	0.0	0.0	0.0	0.0	0.0	0.0	k__Bacteria; p__Bacteroidetes; c__Sphingobacteriia; o__Sphingobacteriales; f__Sphingobacteriaceae; g__Sphingobacterium; s__Unclassified_Sphingobacterium
otu5054	0.0	9.0	0.0	0.0	0.0	0.0	0.0	0.0	k__Bacteria; p__Firmicutes; c__Bacilli; o__Lactobacillales; f__Leuconostocaceae; g__Unclassified_Leuconostocaceae; s__Unclassified_Leuconostocaceae
otu5086	0.0	3.0	6.0	0.0	0.0	0.0	0.0	0.0	k__Bacteria; p__Actinobacteria; c__Actinobacteria; o__Actinomycetales; f__Streptomycetaceae; g__Streptomyces; s__Unclassified_Streptomyces
otu5122	0.0	0.0	0.0	0.0	0.0	0.0	9.0	0.0	k__Bacteria; p__Firmicutes; c__Clostridia; o__Clostridiales; f__Veillonellaceae; g__Veillonella; s__Veillonella_dispar
otu5136	0.0	0.0	0.0	3.0	0.0	4.0	2.0	0.0	k__Bacteria; p__Bacteroidetes; c__Bacteroidia; o__Bacteroidales; f__Porphyromonadaceae; g__Parabacteroides; s__Parabacteroides_distasonis
otu5325	0.0	0.0	0.0	9.0	0.0	0.0	0.0	0.0	k__Bacteria; p__Firmicutes; c__Clostridia; o__Clostridiales; f__Lachnospiraceae; g__Unclassified_Lachnospiraceae; s__Unclassified_Lachnospiraceae
otu5360	9.0	0.0	0.0	0.0	0.0	0.0	0.0	0.0	k__Bacteria; p__Bacteroidetes; c__Bacteroidia; o__Bacteroidales; f__S24-7; g__Unclassified_S24-7; s__Unclassified_S24-7
otu5456	9.0	0.0	0.0	0.0	0.0	0.0	0.0	0.0	k__Bacteria; p__Firmicutes; c__Bacilli; o__Lactobacillales; f__Lactobacillaceae; g__Lactobacillus; s__Unclassified_Lactobacillus
otu5539	0.0	9.0	0.0	0.0	0.0	0.0	0.0	0.0	k__Bacteria; p__Bacteroidetes; c__Bacteroidia; o__Bacteroidales; f__S24-7; g__Unclassified_S24-7; s__Unclassified_S24-7
otu5614	0.0	9.0	0.0	0.0	0.0	0.0	0.0	0.0	k__Bacteria; p__Nitrospirae; c__Nitrospira; o__Nitrospirales; f__0319-6A21; g__Unclassified_0319-6A21; s__Unclassified_0319-6A21
otu5646	0.0	0.0	0.0	0.0	0.0	9.0	0.0	0.0	k__Bacteria; p__Firmicutes; c__Clostridia; o__Clostridiales; f__Lachnospiraceae; g__Unclassified_Lachnospiraceae; s__Unclassified_Lachnospiraceae
otu5654	0.0	9.0	0.0	0.0	0.0	0.0	0.0	0.0	k__Bacteria; p__Chlorobi; c__Ignavibacteria; o__Ignavibacteriales; f__Ignavibacteriaceae; g__Unclassified_Ignavibacteriaceae; s__Unclassified_Ignavibacteriaceae
otu5756	9.0	0.0	0.0	0.0	0.0	0.0	0.0	0.0	k__Bacteria; p__Actinobacteria; c__Actinobacteria; o__Actinomycetales; f__Mycobacteriaceae; g__Mycobacterium; s__Unclassified_Mycobacterium
otu5781	0.0	0.0	0.0	0.0	0.0	1.0	8.0	0.0	k__Bacteria; p__Bacteroidetes; c__Bacteroidia; o__Bacteroidales; f__Bacteroidaceae; g__Bacteroides; s__Unclassified_Bacteroides
otu5912	0.0	9.0	0.0	0.0	0.0	0.0	0.0	0.0	k__Bacteria; p__Firmicutes; c__Clostridia; o__Clostridiales; f__Ruminococcaceae; g__Unclassified_Ruminococcaceae; s__Unclassified_Ruminococcaceae
otu5956	9.0	0.0	0.0	0.0	0.0	0.0	0.0	0.0	k__Bacteria; p__Actinobacteria; c__MB-A2-108; o__0319-7L14; f__Unclassified_0319-7L14; g__Unclassified_0319-7L14; s__Unclassified_0319-7L14
otu6067	9.0	0.0	0.0	0.0	0.0	0.0	0.0	0.0	k__Bacteria; p__Firmicutes; c__Bacilli; o__Lactobacillales; f__Leuconostocaceae; g__Leuconostoc; s__Unclassified_Leuconostoc
otu6399	9.0	0.0	0.0	0.0	0.0	0.0	0.0	0.0	k__Bacteria; p__Chloroflexi; c__Anaerolineae; o__SBR1031; f__A4b; g__Unclassified_A4b; s__Unclassified_A4b
otu6576	0.0	0.0	0.0	0.0	9.0	0.0	0.0	0.0	k__Bacteria; p__Proteobacteria; c__Gammaproteobacteria; o__Enterobacteriales; f__Enterobacteriaceae; g__Unclassified_Enterobacteriaceae; s__Unclassified_Enterobacteriaceae
otu6751	3.0	6.0	0.0	0.0	0.0	0.0	0.0	0.0	k__Bacteria; p__Firmicutes; c__Bacilli; o__Lactobacillales; f__Lactobacillaceae; g__Lactobacillus; s__Unclassified_Lactobacillus
otu6785	0.0	9.0	0.0	0.0	0.0	0.0	0.0	0.0	k__Bacteria; p__Verrucomicrobia; c__Verrucomicrobiae; o__Verrucomicrobiales; f__Verrucomicrobiaceae; g__Akkermansia; s__Akkermansia_muciniphila
otu6794	0.0	9.0	0.0	0.0	0.0	0.0	0.0	0.0	k__Bacteria; p__Firmicutes; c__Clostridia; o__Clostridiales; f__Unclassified_Clostridiales; g__Unclassified_Clostridiales; s__Unclassified_Clostridiales
otu6817	0.0	0.0	0.0	9.0	0.0	0.0	0.0	0.0	k__Bacteria; p__Bacteroidetes; c__Bacteroidia; o__Bacteroidales; f__Bacteroidaceae; g__Bacteroides; s__Unclassified_Bacteroides
otu6824	9.0	0.0	0.0	0.0	0.0	0.0	0.0	0.0	k__Bacteria; p__Firmicutes; c__Clostridia; o__Clostridiales; f__Ruminococcaceae; g__Unclassified_Ruminococcaceae; s__Unclassified_Ruminococcaceae
otu6958	0.0	0.0	0.0	8.0	0.0	0.0	1.0	0.0	k__Bacteria; p__Bacteroidetes; c__Bacteroidia; o__Bacteroidales; f__Bacteroidaceae; g__Bacteroides; s__Unclassified_Bacteroides
otu7001	4.0	5.0	0.0	0.0	0.0	0.0	0.0	0.0	k__Bacteria; p__Proteobacteria; c__Betaproteobacteria; o__Burkholderiales; f__Comamonadaceae; g__Unclassified_Comamonadaceae; s__Unclassified_Comamonadaceae
otu7084	0.0	0.0	0.0	7.0	0.0	2.0	0.0	0.0	k__Bacteria; p__Firmicutes; c__Clostridia; o__Clostridiales; f__Lachnospiraceae; g__Unclassified_Lachnospiraceae; s__Unclassified_Lachnospiraceae
otu7123	0.0	0.0	0.0	0.0	9.0	0.0	0.0	0.0	k__Bacteria; p__Proteobacteria; c__Gammaproteobacteria; o__Aeromonadales; f__Aeromonadaceae; g__Unclassified_Aeromonadaceae; s__Unclassified_Aeromonadaceae
otu7358	0.0	0.0	0.0	0.0	0.0	9.0	0.0	0.0	k__Bacteria; p__Firmicutes; c__Clostridia; o__Clostridiales; f__Ruminococcaceae; g__Unclassified_Ruminococcaceae; s__Unclassified_Ruminococcaceae
otu7525	0.0	0.0	0.0	0.0	0.0	9.0	0.0	0.0	k__Bacteria; p__Firmicutes; c__Clostridia; o__Clostridiales; f__Ruminococcaceae; g__Faecalibacterium; s__Faecalibacterium_prausnitzii
otu7621	9.0	0.0	0.0	0.0	0.0	0.0	0.0	0.0	k__Bacteria; p__Acidobacteria; c__[Chloracidobacteria]; o__RB41; f__Ellin6075; g__Unclassified_Ellin6075; s__Unclassified_Ellin6075
otu60	0.0	0.0	0.0	2.0	0.0	6.0	0.0	0.0	k__Bacteria; p__Bacteroidetes; c__Bacteroidia; o__Bacteroidales; f__Bacteroidaceae; g__Bacteroides; s__Bacteroides_caccae
otu81	0.0	8.0	0.0	0.0	0.0	0.0	0.0	0.0	k__Bacteria; p__Firmicutes; c__Erysipelotrichi; o__Erysipelotrichales; f__Erysipelotrichaceae; g__Allobaculum; s__Unclassified_Allobaculum
otu130	0.0	8.0	0.0	0.0	0.0	0.0	0.0	0.0	k__Bacteria; p__Firmicutes; c__Clostridia; o__Clostridiales; f__Ruminococcaceae; g__Oscillospira; s__Unclassified_Oscillospira
otu226	0.0	0.0	0.0	0.0	8.0	0.0	0.0	0.0	k__Bacteria; p__Proteobacteria; c__Gammaproteobacteria; o__Enterobacteriales; f__Enterobacteriaceae; g__Unclassified_Enterobacteriaceae; s__Unclassified_Enterobacteriaceae
otu283	0.0	8.0	0.0	0.0	0.0	0.0	0.0	0.0	k__Bacteria; p__Firmicutes; c__Clostridia; o__Clostridiales; f__Lachnospiraceae; g__Unclassified_Lachnospiraceae; s__Unclassified_Lachnospiraceae
otu341	0.0	8.0	0.0	0.0	0.0	0.0	0.0	0.0	k__Bacteria; p__Firmicutes; c__Clostridia; o__Clostridiales; f__Lachnospiraceae; g__Unclassified_Lachnospiraceae; s__Unclassified_Lachnospiraceae
otu432	0.0	0.0	0.0	0.0	0.0	8.0	0.0	0.0	k__Bacteria; p__Firmicutes; c__Clostridia; o__Clostridiales; f__Unclassified_Clostridiales; g__Unclassified_Clostridiales; s__Unclassified_Clostridiales
otu529	0.0	0.0	0.0	1.0	0.0	7.0	0.0	0.0	k__Bacteria; p__Bacteroidetes; c__Bacteroidia; o__Bacteroidales; f__Bacteroidaceae; g__Bacteroides; s__Unclassified_Bacteroides
otu559	0.0	8.0	0.0	0.0	0.0	0.0	0.0	0.0	k__Bacteria; p__Bacteroidetes; c__Bacteroidia; o__Bacteroidales; f__Prevotellaceae; g__Unclassified_Prevotellaceae; s__Unclassified_Prevotellaceae
otu560	0.0	8.0	0.0	0.0	0.0	0.0	0.0	0.0	k__Bacteria; p__Bacteroidetes; c__Bacteroidia; o__Bacteroidales; f__S24-7; g__Unclassified_S24-7; s__Unclassified_S24-7
otu715	0.0	0.0	0.0	1.0	6.0	0.0	0.0	1.0	k__Bacteria; p__Firmicutes; c__Erysipelotrichi; o__Erysipelotrichales; f__Erysipelotrichaceae; g__Unclassified_Erysipelotrichaceae; s__Unclassified_Erysipelotrichaceae
otu749	0.0	0.0	0.0	8.0	0.0	0.0	0.0	0.0	k__Bacteria; p__Firmicutes; c__Clostridia; o__Clostridiales; f__Lachnospiraceae; g__Unclassified_Lachnospiraceae; s__Unclassified_Lachnospiraceae
otu832	0.0	0.0	0.0	8.0	0.0	0.0	0.0	0.0	k__Bacteria; p__Firmicutes; c__Clostridia; o__Clostridiales; f__Unclassified_Clostridiales; g__Unclassified_Clostridiales; s__Unclassified_Clostridiales
otu892	8.0	0.0	0.0	0.0	0.0	0.0	0.0	0.0	k__Bacteria; p__Firmicutes; c__Clostridia; o__Clostridiales; f__Ruminococcaceae; g__Unclassified_Ruminococcaceae; s__Unclassified_Ruminococcaceae
otu935	0.0	0.0	0.0	0.0	0.0	8.0	0.0	0.0	k__Bacteria; p__Proteobacteria; c__Epsilonproteobacteria; o__Campylobacterales; f__Helicobacteraceae; g__Wolinella; s__Wolinella_succinogenes
otu937	0.0	8.0	0.0	0.0	0.0	0.0	0.0	0.0	k__Bacteria; p__Actinobacteria; c__Coriobacteriia; o__Coriobacteriales; f__Coriobacteriaceae; g__Adlercreutzia; s__Unclassified_Adlercreutzia
otu982	0.0	8.0	0.0	0.0	0.0	0.0	0.0	0.0	k__Bacteria; p__Firmicutes; c__Clostridia; o__Clostridiales; f__Unclassified_Clostridiales; g__Unclassified_Clostridiales; s__Unclassified_Clostridiales
otu984	0.0	8.0	0.0	0.0	0.0	0.0	0.0	0.0	k__Bacteria; p__Firmicutes; c__Bacilli; o__Lactobacillales; f__Lactobacillaceae; g__Lactobacillus; s__Unclassified_Lactobacillus
otu996	0.0	0.0	0.0	0.0	0.0	0.0	8.0	0.0	k__Bacteria; p__Actinobacteria; c__Actinobacteria; o__Bifidobacteriales; f__Bifidobacteriaceae; g__Bifidobacterium; s__Unclassified_Bifidobacterium
otu1209	0.0	0.0	0.0	0.0	0.0	2.0	6.0	0.0	k__Bacteria; p__Proteobacteria; c__Gammaproteobacteria; o__Enterobacteriales; f__Enterobacteriaceae; g__Unclassified_Enterobacteriaceae; s__Unclassified_Enterobacteriaceae
otu1222	0.0	0.0	0.0	2.0	6.0	0.0	0.0	0.0	k__Bacteria; p__Firmicutes; c__Clostridia; o__Clostridiales; f__Ruminococcaceae; g__Unclassified_Ruminococcaceae; s__Unclassified_Ruminococcaceae
otu1500	8.0	0.0	0.0	0.0	0.0	0.0	0.0	0.0	k__Bacteria; p__Firmicutes; c__Clostridia; o__Clostridiales; f__Lachnospiraceae; g__Coprococcus; s__Unclassified_Coprococcus
otu1524	8.0	0.0	0.0	0.0	0.0	0.0	0.0	0.0	k__Bacteria; p__Firmicutes; c__Clostridia; o__Clostridiales; f__Syntrophomonadaceae; g__Syntrophomonas; s__Unclassified_Syntrophomonas
otu1636	0.0	0.0	0.0	0.0	0.0	0.0	0.0	8.0	k__Bacteria; p__Proteobacteria; c__Betaproteobacteria; o__Burkholderiales; f__Unclassified_Burkholderiales; g__Unclassified_Burkholderiales; s__Unclassified_Burkholderiales
otu1688	0.0	0.0	0.0	0.0	8.0	0.0	0.0	0.0	k__Bacteria; p__Proteobacteria; c__Gammaproteobacteria; o__Enterobacteriales; f__Enterobacteriaceae; g__Unclassified_Enterobacteriaceae; s__Unclassified_Enterobacteriaceae
otu1697	0.0	8.0	0.0	0.0	0.0	0.0	0.0	0.0	k__Bacteria; p__Firmicutes; c__Bacilli; o__Lactobacillales; f__Lactobacillaceae; g__Lactobacillus; s__Unclassified_Lactobacillus
otu1711	8.0	0.0	0.0	0.0	0.0	0.0	0.0	0.0	k__Bacteria; p__Proteobacteria; c__Betaproteobacteria; o__SC-I-84; f__Unclassified_SC-I-84; g__Unclassified_SC-I-84; s__Unclassified_SC-I-84
otu1807	0.0	8.0	0.0	0.0	0.0	0.0	0.0	0.0	k__Bacteria; p__Bacteroidetes; c__Bacteroidia; o__Bacteroidales; f__Porphyromonadaceae; g__Parabacteroides; s__Unclassified_Parabacteroides
otu1812	0.0	5.0	0.0	0.0	0.0	3.0	0.0	0.0	k__Bacteria; p__Firmicutes; c__Clostridia; o__Clostridiales; f__Lachnospiraceae; g__Unclassified_Lachnospiraceae; s__Unclassified_Lachnospiraceae
otu1836	0.0	0.0	0.0	0.0	8.0	0.0	0.0	0.0	k__Bacteria; p__Firmicutes; c__Clostridia; o__Clostridiales; f__Lachnospiraceae; g__Unclassified_Lachnospiraceae; s__Unclassified_Lachnospiraceae
otu1857	8.0	0.0	0.0	0.0	0.0	0.0	0.0	0.0	k__Bacteria; p__Proteobacteria; c__Betaproteobacteria; o__Methylophilales; f__Methylophilaceae; g__Unclassified_Methylophilaceae; s__Unclassified_Methylophilaceae
otu1867	0.0	0.0	0.0	8.0	0.0	0.0	0.0	0.0	k__Bacteria; p__Firmicutes; c__Clostridia; o__Clostridiales; f__Unclassified_Clostridiales; g__Unclassified_Clostridiales; s__Unclassified_Clostridiales
otu1883	0.0	8.0	0.0	0.0	0.0	0.0	0.0	0.0	k__Bacteria; p__Gemmatimonadetes; c__Gemmatimonadetes; o__C114; f__Unclassified_C114; g__Unclassified_C114; s__Unclassified_C114
otu1977	0.0	8.0	0.0	0.0	0.0	0.0	0.0	0.0	k__Bacteria; p__Proteobacteria; c__Gammaproteobacteria; o__Alteromonadales; f__[Chromatiaceae]; g__Unclassified_[Chromatiaceae]; s__Unclassified_[Chromatiaceae]
otu2015	0.0	8.0	0.0	0.0	0.0	0.0	0.0	0.0	k__Bacteria; p__Bacteroidetes; c__Bacteroidia; o__Bacteroidales; f__Prevotellaceae; g__Prevotella; s__Unclassified_Prevotella
otu2060	0.0	8.0	0.0	0.0	0.0	0.0	0.0	0.0	k__Bacteria; p__Bacteroidetes; c__Bacteroidia; o__Bacteroidales; f__S24-7; g__Unclassified_S24-7; s__Unclassified_S24-7
otu2219	7.0	1.0	0.0	0.0	0.0	0.0	0.0	0.0	k__Bacteria; p__Proteobacteria; c__Alphaproteobacteria; o__Sphingomonadales; f__Sphingomonadaceae; g__Unclassified_Sphingomonadaceae; s__Unclassified_Sphingomonadaceae
otu2246	0.0	0.0	0.0	0.0	0.0	0.0	8.0	0.0	k__Bacteria; p__Proteobacteria; c__Gammaproteobacteria; o__Enterobacteriales; f__Enterobacteriaceae; g__Unclassified_Enterobacteriaceae; s__Unclassified_Enterobacteriaceae
otu2335	0.0	0.0	8.0	0.0	0.0	0.0	0.0	0.0	k__Bacteria; p__Acidobacteria; c__iii1-8; o__SJA-36; f__Unclassified_SJA-36; g__Unclassified_SJA-36; s__Unclassified_SJA-36
otu2344	0.0	0.0	0.0	8.0	0.0	0.0	0.0	0.0	k__Bacteria; p__Firmicutes; c__Clostridia; o__Clostridiales; f__Unclassified_Clostridiales; g__Unclassified_Clostridiales; s__Unclassified_Clostridiales
otu2362	0.0	0.0	0.0	1.0	0.0	1.0	6.0	0.0	k__Bacteria; p__Firmicutes; c__Clostridia; o__Clostridiales; f__Lachnospiraceae; g__Clostridium; s__Clostridium_hathewayi
otu2390	0.0	0.0	0.0	0.0	0.0	1.0	7.0	0.0	k__Bacteria; p__Proteobacteria; c__Gammaproteobacteria; o__Enterobacteriales; f__Enterobacteriaceae; g__Unclassified_Enterobacteriaceae; s__Unclassified_Enterobacteriaceae
otu2404	0.0	0.0	0.0	7.0	0.0	0.0	0.0	1.0	k__Bacteria; p__Bacteroidetes; c__Bacteroidia; o__Bacteroidales; f__Bacteroidaceae; g__Bacteroides; s__Unclassified_Bacteroides
otu2442	0.0	6.0	0.0	0.0	0.0	0.0	0.0	2.0	k__Bacteria; p__Proteobacteria; c__Betaproteobacteria; o__Burkholderiales; f__Oxalobacteraceae; g__Herbaspirillum; s__Unclassified_Herbaspirillum
otu2572	0.0	8.0	0.0	0.0	0.0	0.0	0.0	0.0	k__Bacteria; p__Firmicutes; c__Clostridia; o__Clostridiales; f__Ruminococcaceae; g__Unclassified_Ruminococcaceae; s__Unclassified_Ruminococcaceae
otu2670	0.0	8.0	0.0	0.0	0.0	0.0	0.0	0.0	k__Bacteria; p__Bacteroidetes; c__Bacteroidia; o__Bacteroidales; f__S24-7; g__Unclassified_S24-7; s__Unclassified_S24-7
otu2681	8.0	0.0	0.0	0.0	0.0	0.0	0.0	0.0	k__Bacteria; p__Proteobacteria; c__Alphaproteobacteria; o__Sphingomonadales; f__Sphingomonadaceae; g__Blastomonas; s__Blastomonas_natatoria
otu2820	8.0	0.0	0.0	0.0	0.0	0.0	0.0	0.0	k__Bacteria; p__Bacteroidetes; c__Bacteroidia; o__Bacteroidales; f__Rikenellaceae; g__Unclassified_Rikenellaceae; s__Unclassified_Rikenellaceae
otu2870	0.0	8.0	0.0	0.0	0.0	0.0	0.0	0.0	k__Bacteria; p__Chloroflexi; c__Anaerolineae; o__SJA-15; f__Unclassified_SJA-15; g__Unclassified_SJA-15; s__Unclassified_SJA-15
otu2883	0.0	8.0	0.0	0.0	0.0	0.0	0.0	0.0	k__Bacteria; p__Bacteroidetes; c__Bacteroidia; o__Bacteroidales; f__Porphyromonadaceae; g__Parabacteroides; s__Unclassified_Parabacteroides
otu2957	8.0	0.0	0.0	0.0	0.0	0.0	0.0	0.0	k__Bacteria; p__Firmicutes; c__Clostridia; o__Clostridiales; f__Ruminococcaceae; g__Unclassified_Ruminococcaceae; s__Unclassified_Ruminococcaceae
otu2964	0.0	8.0	0.0	0.0	0.0	0.0	0.0	0.0	k__Bacteria; p__Firmicutes; c__Bacilli; o__Bacillales; f__Bacillaceae; g__Unclassified_Bacillaceae; s__Unclassified_Bacillaceae
otu3000	0.0	8.0	0.0	0.0	0.0	0.0	0.0	0.0	k__Bacteria; p__Bacteroidetes; c__Bacteroidia; o__Bacteroidales; f__Prevotellaceae; g__Prevotella; s__Unclassified_Prevotella
otu3162	0.0	2.0	0.0	1.0	0.0	2.0	3.0	0.0	k__Bacteria; p__Actinobacteria; c__Actinobacteria; o__Actinomycetales; f__Actinomycetaceae; g__Actinomyces; s__Unclassified_Actinomyces
otu3218	8.0	0.0	0.0	0.0	0.0	0.0	0.0	0.0	k__Bacteria; p__Firmicutes; c__Clostridia; o__Clostridiales; f__Ruminococcaceae; g__Ruminococcus; s__Unclassified_Ruminococcus
otu3223	8.0	0.0	0.0	0.0	0.0	0.0	0.0	0.0	k__Bacteria; p__Proteobacteria; c__Gammaproteobacteria; o__Oceanospirillales; f__Halomonadaceae; g__Haererehalobacter; s__Haererehalobacter_salaria
otu3233	0.0	8.0	0.0	0.0	0.0	0.0	0.0	0.0	k__Bacteria; p__Firmicutes; c__Clostridia; o__Clostridiales; f__Unclassified_Clostridiales; g__Unclassified_Clostridiales; s__Unclassified_Clostridiales
otu3248	8.0	0.0	0.0	0.0	0.0	0.0	0.0	0.0	k__Bacteria; p__Firmicutes; c__Clostridia; o__Clostridiales; f__Ruminococcaceae; g__Ruminococcus; s__Unclassified_Ruminococcus
otu3258	0.0	0.0	0.0	7.0	0.0	0.0	0.0	1.0	k__Bacteria; p__Firmicutes; c__Clostridia; o__Clostridiales; f__Lachnospiraceae; g__[Ruminococcus]; s__[Ruminococcus]_gnavus
otu3330	0.0	8.0	0.0	0.0	0.0	0.0	0.0	0.0	k__Bacteria; p__Firmicutes; c__Clostridia; o__Clostridiales; f__Lachnospiraceae; g__Unclassified_Lachnospiraceae; s__Unclassified_Lachnospiraceae
otu3388	0.0	0.0	0.0	8.0	0.0	0.0	0.0	0.0	k__Bacteria; p__Firmicutes; c__Clostridia; o__Clostridiales; f__Lachnospiraceae; g__Unclassified_Lachnospiraceae; s__Unclassified_Lachnospiraceae
otu3583	0.0	0.0	0.0	0.0	0.0	0.0	0.0	8.0	k__Bacteria; p__Bacteroidetes; c__Bacteroidia; o__Bacteroidales; f__Bacteroidaceae; g__Bacteroides; s__Bacteroides_fragilis
otu3597	8.0	0.0	0.0	0.0	0.0	0.0	0.0	0.0	k__Bacteria; p__Bacteroidetes; c__Flavobacteriia; o__Flavobacteriales; f__[Weeksellaceae]; g__Chryseobacterium; s__Unclassified_Chryseobacterium
otu3814	0.0	8.0	0.0	0.0	0.0	0.0	0.0	0.0	k__Bacteria; p__Firmicutes; c__Clostridia; o__Clostridiales; f__Unclassified_Clostridiales; g__Unclassified_Clostridiales; s__Unclassified_Clostridiales
otu3817	0.0	0.0	7.0	1.0	0.0	0.0	0.0	0.0	k__Bacteria; p__Firmicutes; c__Clostridia; o__Clostridiales; f__Unclassified_Clostridiales; g__Unclassified_Clostridiales; s__Unclassified_Clostridiales
otu3822	8.0	0.0	0.0	0.0	0.0	0.0	0.0	0.0	k__Bacteria; p__Bacteroidetes; c__Bacteroidia; o__Bacteroidales; f__Prevotellaceae; g__Prevotella; s__Prevotella_copri
otu3942	0.0	8.0	0.0	0.0	0.0	0.0	0.0	0.0	k__Bacteria; p__Proteobacteria; c__Deltaproteobacteria; o__Myxococcales; f__Myxococcaceae; g__Unclassified_Myxococcaceae; s__Unclassified_Myxococcaceae
otu4005	0.0	8.0	0.0	0.0	0.0	0.0	0.0	0.0	k__Bacteria; p__Firmicutes; c__Clostridia; o__Clostridiales; f__Ruminococcaceae; g__Unclassified_Ruminococcaceae; s__Unclassified_Ruminococcaceae
otu4034	0.0	8.0	0.0	0.0	0.0	0.0	0.0	0.0	k__Bacteria; p__Firmicutes; c__Clostridia; o__Clostridiales; f__Dehalobacteriaceae; g__Unclassified_Dehalobacteriaceae; s__Unclassified_Dehalobacteriaceae
otu4064	0.0	8.0	0.0	0.0	0.0	0.0	0.0	0.0	k__Bacteria; p__Firmicutes; c__Bacilli; o__Lactobacillales; f__Lactobacillaceae; g__Lactobacillus; s__Unclassified_Lactobacillus
otu4096	2.0	0.0	0.0	0.0	0.0	6.0	0.0	0.0	k__Bacteria; p__Firmicutes; c__Clostridia; o__Clostridiales; f__Ruminococcaceae; g__Oscillospira; s__Unclassified_Oscillospira
otu4110	0.0	0.0	0.0	0.0	0.0	7.0	1.0	0.0	k__Bacteria; p__Proteobacteria; c__Gammaproteobacteria; o__Enterobacteriales; f__Enterobacteriaceae; g__Unclassified_Enterobacteriaceae; s__Unclassified_Enterobacteriaceae
otu4113	0.0	8.0	0.0	0.0	0.0	0.0	0.0	0.0	k__Bacteria; p__Firmicutes; c__Clostridia; o__Clostridiales; f__Lachnospiraceae; g__Blautia; s__Blautia_producta
otu4214	0.0	0.0	0.0	0.0	0.0	0.0	1.0	7.0	k__Bacteria; p__Firmicutes; c__Bacilli; o__Lactobacillales; f__Enterococcaceae; g__Enterococcus; s__Unclassified_Enterococcus
otu4242	0.0	0.0	0.0	8.0	0.0	0.0	0.0	0.0	k__Bacteria; p__Firmicutes; c__Clostridia; o__Clostridiales; f__Lachnospiraceae; g__Clostridium; s__Clostridium_hathewayi
otu4250	0.0	0.0	0.0	0.0	8.0	0.0	0.0	0.0	k__Bacteria; p__Proteobacteria; c__Gammaproteobacteria; o__Enterobacteriales; f__Enterobacteriaceae; g__Unclassified_Enterobacteriaceae; s__Unclassified_Enterobacteriaceae
otu4251	0.0	8.0	0.0	0.0	0.0	0.0	0.0	0.0	k__Bacteria; p__Bacteroidetes; c__Bacteroidia; o__Bacteroidales; f__S24-7; g__Unclassified_S24-7; s__Unclassified_S24-7
otu4316	0.0	8.0	0.0	0.0	0.0	0.0	0.0	0.0	k__Bacteria; p__Firmicutes; c__Clostridia; o__Clostridiales; f__Ruminococcaceae; g__Unclassified_Ruminococcaceae; s__Unclassified_Ruminococcaceae
otu4396	0.0	0.0	0.0	1.0	4.0	2.0	0.0	1.0	k__Bacteria; p__Actinobacteria; c__Coriobacteriia; o__Coriobacteriales; f__Coriobacteriaceae; g__Eggerthella; s__Unclassified_Eggerthella
otu4475	0.0	0.0	0.0	0.0	5.0	0.0	3.0	0.0	k__Bacteria; p__Firmicutes; c__Clostridia; o__Clostridiales; f__Peptostreptococcaceae; g__[Clostridium]; s__[Clostridium]_difficile
otu4479	8.0	0.0	0.0	0.0	0.0	0.0	0.0	0.0	k__Bacteria; p__Nitrospirae; c__Nitrospira; o__Nitrospirales; f__0319-6A21; g__Unclassified_0319-6A21; s__Unclassified_0319-6A21
otu4524	8.0	0.0	0.0	0.0	0.0	0.0	0.0	0.0	k__Bacteria; p__Firmicutes; c__Bacilli; o__Bacillales; f__Bacillaceae; g__Bacillus; s__Unclassified_Bacillus
otu4603	8.0	0.0	0.0	0.0	0.0	0.0	0.0	0.0	k__Bacteria; p__Firmicutes; c__Clostridia; o__Clostridiales; f__Unclassified_Clostridiales; g__Unclassified_Clostridiales; s__Unclassified_Clostridiales
otu4614	0.0	8.0	0.0	0.0	0.0	0.0	0.0	0.0	k__Bacteria; p__Firmicutes; c__Clostridia; o__Clostridiales; f__Lachnospiraceae; g__Blautia; s__Unclassified_Blautia
otu4617	0.0	8.0	0.0	0.0	0.0	0.0	0.0	0.0	k__Bacteria; p__Bacteroidetes; c__Bacteroidia; o__Bacteroidales; f__S24-7; g__Unclassified_S24-7; s__Unclassified_S24-7
otu4631	0.0	0.0	0.0	7.0	0.0	0.0	1.0	0.0	k__Bacteria; p__Firmicutes; c__Clostridia; o__Clostridiales; f__Lachnospiraceae; g__Unclassified_Lachnospiraceae; s__Unclassified_Lachnospiraceae
otu4658	0.0	0.0	0.0	0.0	0.0	8.0	0.0	0.0	k__Bacteria; p__Proteobacteria; c__Gammaproteobacteria; o__Pseudomonadales; f__Moraxellaceae; g__Enhydrobacter; s__Unclassified_Enhydrobacter
otu4673	0.0	0.0	0.0	0.0	0.0	8.0	0.0	0.0	k__Bacteria; p__Bacteroidetes; c__Bacteroidia; o__Bacteroidales; f__Bacteroidaceae; g__Bacteroides; s__Bacteroides_eggerthii
otu4803	0.0	0.0	0.0	8.0	0.0	0.0	0.0	0.0	k__Bacteria; p__Actinobacteria; c__Coriobacteriia; o__Coriobacteriales; f__Coriobacteriaceae; g__Collinsella; s__Unclassified_Collinsella
otu4834	0.0	8.0	0.0	0.0	0.0	0.0	0.0	0.0	k__Bacteria; p__Proteobacteria; c__Gammaproteobacteria; o__Oceanospirillales; f__Halomonadaceae; g__Candidatus_Portiera; s__Unclassified_Candidatus_Portiera
otu4858	0.0	8.0	0.0	0.0	0.0	0.0	0.0	0.0	k__Bacteria; p__Firmicutes; c__Bacilli; o__Lactobacillales; f__Lactobacillaceae; g__Lactobacillus; s__Unclassified_Lactobacillus
otu4884	0.0	8.0	0.0	0.0	0.0	0.0	0.0	0.0	k__Bacteria; p__Firmicutes; c__Clostridia; o__Clostridiales; f__Ruminococcaceae; g__Unclassified_Ruminococcaceae; s__Unclassified_Ruminococcaceae
otu4958	8.0	0.0	0.0	0.0	0.0	0.0	0.0	0.0	k__Bacteria; p__Bacteroidetes; c__Bacteroidia; o__Bacteroidales; f__S24-7; g__Unclassified_S24-7; s__Unclassified_S24-7
otu4982	3.0	5.0	0.0	0.0	0.0	0.0	0.0	0.0	k__Bacteria; p__Firmicutes; c__Clostridia; o__Clostridiales; f__Unclassified_Clostridiales; g__Unclassified_Clostridiales; s__Unclassified_Clostridiales
otu4986	0.0	8.0	0.0	0.0	0.0	0.0	0.0	0.0	k__Bacteria; p__Proteobacteria; c__Alphaproteobacteria; o__Rhizobiales; f__Brucellaceae; g__Ochrobactrum; s__Unclassified_Ochrobactrum
otu5097	2.0	6.0	0.0	0.0	0.0	0.0	0.0	0.0	k__Bacteria; p__Cyanobacteria; c__4C0d-2; o__MLE1-12; f__Unclassified_MLE1-12; g__Unclassified_MLE1-12; s__Unclassified_MLE1-12
otu5109	3.0	5.0	0.0	0.0	0.0	0.0	0.0	0.0	k__Bacteria; p__Firmicutes; c__Clostridia; o__Clostridiales; f__Ruminococcaceae; g__Ruminococcus; s__Unclassified_Ruminococcus
otu5132	7.0	1.0	0.0	0.0	0.0	0.0	0.0	0.0	k__Bacteria; p__AD3; c__ABS-6; o__Unclassified_ABS-6; f__Unclassified_ABS-6; g__Unclassified_ABS-6; s__Unclassified_ABS-6
otu5167	0.0	8.0	0.0	0.0	0.0	0.0	0.0	0.0	k__Bacteria; p__Firmicutes; c__Clostridia; o__Clostridiales; f__Ruminococcaceae; g__Unclassified_Ruminococcaceae; s__Unclassified_Ruminococcaceae
otu5177	0.0	5.0	1.0	0.0	0.0	0.0	0.0	2.0	k__Bacteria; p__Actinobacteria; c__Acidimicrobiia; o__Acidimicrobiales; f__Unclassified_Acidimicrobiales; g__Unclassified_Acidimicrobiales; s__Unclassified_Acidimicrobiales
otu5187	0.0	0.0	0.0	0.0	0.0	0.0	8.0	0.0	k__Bacteria; p__Firmicutes; c__Clostridia; o__Clostridiales; f__Veillonellaceae; g__Veillonella; s__Veillonella_dispar
otu5302	0.0	0.0	0.0	1.0	0.0	2.0	5.0	0.0	k__Bacteria; p__Bacteroidetes; c__Bacteroidia; o__Bacteroidales; f__Bacteroidaceae; g__Bacteroides; s__Unclassified_Bacteroides
otu5340	0.0	0.0	0.0	6.0	0.0	0.0	0.0	2.0	k__Bacteria; p__Firmicutes; c__Clostridia; o__Clostridiales; f__Lachnospiraceae; g__Dorea; s__Unclassified_Dorea
otu5538	0.0	8.0	0.0	0.0	0.0	0.0	0.0	0.0	k__Bacteria; p__Verrucomicrobia; c__Verrucomicrobiae; o__Verrucomicrobiales; f__Verrucomicrobiaceae; g__Akkermansia; s__Akkermansia_muciniphila
otu5573	0.0	0.0	0.0	8.0	0.0	0.0	0.0	0.0	k__Bacteria; p__Firmicutes; c__Clostridia; o__Clostridiales; f__Ruminococcaceae; g__Unclassified_Ruminococcaceae; s__Unclassified_Ruminococcaceae
otu5656	0.0	8.0	0.0	0.0	0.0	0.0	0.0	0.0	k__Bacteria; p__Firmicutes; c__Clostridia; o__Clostridiales; f__Lachnospiraceae; g__Unclassified_Lachnospiraceae; s__Unclassified_Lachnospiraceae
otu5685	0.0	0.0	0.0	3.0	0.0	0.0	5.0	0.0	k__Bacteria; p__Firmicutes; c__Clostridia; o__Clostridiales; f__Ruminococcaceae; g__Unclassified_Ruminococcaceae; s__Unclassified_Ruminococcaceae
otu5702	0.0	0.0	0.0	0.0	8.0	0.0	0.0	0.0	k__Bacteria; p__Proteobacteria; c__Gammaproteobacteria; o__Enterobacteriales; f__Enterobacteriaceae; g__Unclassified_Enterobacteriaceae; s__Unclassified_Enterobacteriaceae
otu5734	0.0	0.0	0.0	0.0	0.0	0.0	8.0	0.0	k__Bacteria; p__Firmicutes; c__Bacilli; o__Lactobacillales; f__Enterococcaceae; g__Enterococcus; s__Unclassified_Enterococcus
otu5739	0.0	8.0	0.0	0.0	0.0	0.0	0.0	0.0	k__Bacteria; p__Acidobacteria; c__Solibacteres; o__Solibacterales; f__Unclassified_Solibacterales; g__Unclassified_Solibacterales; s__Unclassified_Solibacterales
otu5798	0.0	8.0	0.0	0.0	0.0	0.0	0.0	0.0	k__Bacteria; p__Firmicutes; c__Clostridia; o__Clostridiales; f__Unclassified_Clostridiales; g__Unclassified_Clostridiales; s__Unclassified_Clostridiales
otu5848	0.0	6.0	2.0	0.0	0.0	0.0	0.0	0.0	k__Bacteria; p__Firmicutes; c__Bacilli; o__Lactobacillales; f__Lactobacillaceae; g__Lactobacillus; s__Unclassified_Lactobacillus
otu5862	0.0	8.0	0.0	0.0	0.0	0.0	0.0	0.0	k__Bacteria; p__Firmicutes; c__Clostridia; o__Clostridiales; f__Lachnospiraceae; g__Unclassified_Lachnospiraceae; s__Unclassified_Lachnospiraceae
otu5913	0.0	0.0	0.0	8.0	0.0	0.0	0.0	0.0	k__Bacteria; p__Firmicutes; c__Clostridia; o__Clostridiales; f__Lachnospiraceae; g__[Ruminococcus]; s__[Ruminococcus]_gnavus
otu5937	0.0	8.0	0.0	0.0	0.0	0.0	0.0	0.0	k__Bacteria; p__Firmicutes; c__Clostridia; o__Clostridiales; f__Lachnospiraceae; g__Blautia; s__Unclassified_Blautia
otu5948	0.0	8.0	0.0	0.0	0.0	0.0	0.0	0.0	k__Bacteria; p__Bacteroidetes; c__Bacteroidia; o__Bacteroidales; f__S24-7; g__Unclassified_S24-7; s__Unclassified_S24-7
otu5989	4.0	3.0	0.0	0.0	0.0	0.0	0.0	1.0	k__Bacteria; p__Actinobacteria; c__Actinobacteria; o__Actinomycetales; f__Mycobacteriaceae; g__Mycobacterium; s__Unclassified_Mycobacterium
otu6017	1.0	7.0	0.0	0.0	0.0	0.0	0.0	0.0	k__Bacteria; p__Actinobacteria; c__Actinobacteria; o__Bifidobacteriales; f__Bifidobacteriaceae; g__Gardnerella; s__Unclassified_Gardnerella
otu6070	0.0	0.0	0.0	4.0	0.0	1.0	3.0	0.0	k__Bacteria; p__Bacteroidetes; c__Bacteroidia; o__Bacteroidales; f__Bacteroidaceae; g__Bacteroides; s__Unclassified_Bacteroides
otu6095	2.0	6.0	0.0	0.0	0.0	0.0	0.0	0.0	k__Bacteria; p__Firmicutes; c__Clostridia; o__Clostridiales; f__Lachnospiraceae; g__Dorea; s__Unclassified_Dorea
otu6150	0.0	0.0	0.0	8.0	0.0	0.0	0.0	0.0	k__Bacteria; p__Firmicutes; c__Clostridia; o__Clostridiales; f__Lachnospiraceae; g__[Ruminococcus]; s__[Ruminococcus]_gnavus
otu6384	6.0	0.0	0.0	0.0	0.0	0.0	0.0	2.0	k__Bacteria; p__Bacteroidetes; c__Bacteroidia; o__Bacteroidales; f__Bacteroidaceae; g__Bacteroides; s__Bacteroides_fragilis
otu6388	0.0	0.0	0.0	5.0	0.0	1.0	2.0	0.0	k__Bacteria; p__Firmicutes; c__Clostridia; o__Clostridiales; f__Lachnospiraceae; g__Unclassified_Lachnospiraceae; s__Unclassified_Lachnospiraceae
otu6444	0.0	1.0	0.0	0.0	0.0	7.0	0.0	0.0	k__Bacteria; p__Firmicutes; c__Clostridia; o__Clostridiales; f__[Tissierellaceae]; g__Peptoniphilus; s__Unclassified_Peptoniphilus
otu6457	0.0	0.0	0.0	8.0	0.0	0.0	0.0	0.0	k__Bacteria; p__Firmicutes; c__Clostridia; o__Clostridiales; f__Ruminococcaceae; g__Oscillospira; s__Unclassified_Oscillospira
otu6481	0.0	0.0	0.0	0.0	0.0	8.0	0.0	0.0	k__Bacteria; p__Firmicutes; c__Clostridia; o__Clostridiales; f__Lachnospiraceae; g__Roseburia; s__Unclassified_Roseburia
otu6527	0.0	0.0	0.0	0.0	0.0	0.0	8.0	0.0	k__Bacteria; p__Firmicutes; c__Clostridia; o__Clostridiales; f__Ruminococcaceae; g__Unclassified_Ruminococcaceae; s__Unclassified_Ruminococcaceae
otu6539	0.0	6.0	2.0	0.0	0.0	0.0	0.0	0.0	k__Bacteria; p__Acidobacteria; c__Acidobacteria-6; o__iii1-15; f__Unclassified_iii1-15; g__Unclassified_iii1-15; s__Unclassified_iii1-15
otu6564	0.0	8.0	0.0	0.0	0.0	0.0	0.0	0.0	k__Bacteria; p__Firmicutes; c__Clostridia; o__Clostridiales; f__Ruminococcaceae; g__Unclassified_Ruminococcaceae; s__Unclassified_Ruminococcaceae
otu6585	0.0	8.0	0.0	0.0	0.0	0.0	0.0	0.0	k__Bacteria; p__Firmicutes; c__Clostridia; o__Clostridiales; f__Ruminococcaceae; g__Unclassified_Ruminococcaceae; s__Unclassified_Ruminococcaceae
otu6662	0.0	8.0	0.0	0.0	0.0	0.0	0.0	0.0	k__Bacteria; p__Firmicutes; c__Bacilli; o__Lactobacillales; f__Lactobacillaceae; g__Lactobacillus; s__Unclassified_Lactobacillus
otu6762	0.0	0.0	0.0	0.0	0.0	0.0	8.0	0.0	k__Bacteria; p__Proteobacteria; c__Gammaproteobacteria; o__Enterobacteriales; f__Enterobacteriaceae; g__Unclassified_Enterobacteriaceae; s__Unclassified_Enterobacteriaceae
otu6777	0.0	8.0	0.0	0.0	0.0	0.0	0.0	0.0	k__Bacteria; p__Firmicutes; c__Clostridia; o__Clostridiales; f__Unclassified_Clostridiales; g__Unclassified_Clostridiales; s__Unclassified_Clostridiales
otu6946	7.0	1.0	0.0	0.0	0.0	0.0	0.0	0.0	k__Bacteria; p__Proteobacteria; c__Betaproteobacteria; o__Rhodocyclales; f__Rhodocyclaceae; g__KD1-23; s__Unclassified_KD1-23
otu7040	8.0	0.0	0.0	0.0	0.0	0.0	0.0	0.0	k__Bacteria; p__Firmicutes; c__Clostridia; o__Clostridiales; f__Lachnospiraceae; g__Unclassified_Lachnospiraceae; s__Unclassified_Lachnospiraceae
otu7146	0.0	8.0	0.0	0.0	0.0	0.0	0.0	0.0	k__Bacteria; p__Firmicutes; c__Clostridia; o__Clostridiales; f__Unclassified_Clostridiales; g__Unclassified_Clostridiales; s__Unclassified_Clostridiales
otu7285	0.0	0.0	0.0	0.0	0.0	8.0	0.0	0.0	k__Bacteria; p__Proteobacteria; c__Gammaproteobacteria; o__Pseudomonadales; f__Moraxellaceae; g__Enhydrobacter; s__Unclassified_Enhydrobacter
otu7485	8.0	0.0	0.0	0.0	0.0	0.0	0.0	0.0	k__Bacteria; p__Acidobacteria; c__BPC102; o__MVS-40; f__Unclassified_MVS-40; g__Unclassified_MVS-40; s__Unclassified_MVS-40
otu7502	0.0	8.0	0.0	0.0	0.0	0.0	0.0	0.0	k__Bacteria; p__Proteobacteria; c__Alphaproteobacteria; o__Caulobacterales; f__Caulobacteraceae; g__Brevundimonas; s__Brevundimonas_poindexterae
otu7508	0.0	8.0	0.0	0.0	0.0	0.0	0.0	0.0	k__Bacteria; p__Firmicutes; c__Clostridia; o__Clostridiales; f__Ruminococcaceae; g__Unclassified_Ruminococcaceae; s__Unclassified_Ruminococcaceae
otu7563	0.0	8.0	0.0	0.0	0.0	0.0	0.0	0.0	k__Bacteria; p__Firmicutes; c__Clostridia; o__Clostridiales; f__Ruminococcaceae; g__Unclassified_Ruminococcaceae; s__Unclassified_Ruminococcaceae
otu7617	5.0	3.0	0.0	0.0	0.0	0.0	0.0	0.0	k__Bacteria; p__Proteobacteria; c__Gammaproteobacteria; o__Pseudomonadales; f__Moraxellaceae; g__Acinetobacter; s__Unclassified_Acinetobacter
otu7696	6.0	1.0	0.0	0.0	0.0	1.0	0.0	0.0	k__Bacteria; p__Proteobacteria; c__Alphaproteobacteria; o__Caulobacterales; f__Caulobacteraceae; g__Unclassified_Caulobacteraceae; s__Unclassified_Caulobacteraceae
otu7744	0.0	7.0	1.0	0.0	0.0	0.0	0.0	0.0	k__Bacteria; p__Firmicutes; c__Clostridia; o__Clostridiales; f__Unclassified_Clostridiales; g__Unclassified_Clostridiales; s__Unclassified_Clostridiales
otu7756	0.0	0.0	0.0	7.0	0.0	0.0	1.0	0.0	k__Bacteria; p__Firmicutes; c__Clostridia; o__Clostridiales; f__Ruminococcaceae; g__Unclassified_Ruminococcaceae; s__Unclassified_Ruminococcaceae
otu3	0.0	0.0	0.0	0.0	0.0	1.0	6.0	0.0	k__Bacteria; p__Firmicutes; c__Clostridia; o__Clostridiales; f__Ruminococcaceae; g__Unclassified_Ruminococcaceae; s__Unclassified_Ruminococcaceae
otu43	0.0	0.0	7.0	0.0	0.0	0.0	0.0	0.0	k__Bacteria; p__Actinobacteria; c__Actinobacteria; o__Bifidobacteriales; f__Bifidobacteriaceae; g__Bifidobacterium; s__Unclassified_Bifidobacterium
otu53	0.0	5.0	0.0	0.0	0.0	2.0	0.0	0.0	k__Bacteria; p__Proteobacteria; c__Gammaproteobacteria; o__Enterobacteriales; f__Enterobacteriaceae; g__Unclassified_Enterobacteriaceae; s__Unclassified_Enterobacteriaceae
otu110	1.0	4.0	0.0	2.0	0.0	0.0	0.0	0.0	k__Bacteria; p__Firmicutes; c__Bacilli; o__Lactobacillales; f__Streptococcaceae; g__Streptococcus; s__Unclassified_Streptococcus
otu269	7.0	0.0	0.0	0.0	0.0	0.0	0.0	0.0	k__Bacteria; p__Firmicutes; c__Clostridia; o__Clostridiales; f__Lachnospiraceae; g__Coprococcus; s__Unclassified_Coprococcus
otu286	0.0	0.0	0.0	0.0	7.0	0.0	0.0	0.0	k__Bacteria; p__Firmicutes; c__Erysipelotrichi; o__Erysipelotrichales; f__Erysipelotrichaceae; g__Unclassified_Erysipelotrichaceae; s__Unclassified_Erysipelotrichaceae
otu378	0.0	7.0	0.0	0.0	0.0	0.0	0.0	0.0	k__Bacteria; p__Firmicutes; c__Clostridia; o__Clostridiales; f__Ruminococcaceae; g__Unclassified_Ruminococcaceae; s__Unclassified_Ruminococcaceae
otu419	0.0	0.0	0.0	0.0	0.0	0.0	0.0	7.0	k__Bacteria; p__Proteobacteria; c__Betaproteobacteria; o__Burkholderiales; f__Oxalobacteraceae; g__Herbaspirillum; s__Unclassified_Herbaspirillum
otu420	0.0	7.0	0.0	0.0	0.0	0.0	0.0	0.0	k__Bacteria; p__Firmicutes; c__Clostridia; o__Clostridiales; f__Unclassified_Clostridiales; g__Unclassified_Clostridiales; s__Unclassified_Clostridiales
otu428	0.0	7.0	0.0	0.0	0.0	0.0	0.0	0.0	k__Bacteria; p__Proteobacteria; c__Deltaproteobacteria; o__Desulfovibrionales; f__Desulfovibrionaceae; g__Unclassified_Desulfovibrionaceae; s__Unclassified_Desulfovibrionaceae
otu504	0.0	7.0	0.0	0.0	0.0	0.0	0.0	0.0	k__Bacteria; p__Bacteroidetes; c__Cytophagia; o__Cytophagales; f__Cytophagaceae; g__Unclassified_Cytophagaceae; s__Unclassified_Cytophagaceae
otu732	7.0	0.0	0.0	0.0	0.0	0.0	0.0	0.0	k__Bacteria; p__Proteobacteria; c__Betaproteobacteria; o__Burkholderiales; f__Comamonadaceae; g__Unclassified_Comamonadaceae; s__Unclassified_Comamonadaceae
otu738	0.0	7.0	0.0	0.0	0.0	0.0	0.0	0.0	k__Bacteria; p__Firmicutes; c__Clostridia; o__Clostridiales; f__Lachnospiraceae; g__Blautia; s__Unclassified_Blautia
otu778	0.0	0.0	3.0	0.0	0.0	0.0	4.0	0.0	k__Bacteria; p__Firmicutes; c__Clostridia; o__Clostridiales; f__Lachnospiraceae; g__Epulopiscium; s__Unclassified_Epulopiscium
otu793	7.0	0.0	0.0	0.0	0.0	0.0	0.0	0.0	k__Bacteria; p__Gemmatimonadetes; c__Gemm-1; o__Unclassified_Gemm-1; f__Unclassified_Gemm-1; g__Unclassified_Gemm-1; s__Unclassified_Gemm-1
otu840	0.0	7.0	0.0	0.0	0.0	0.0	0.0	0.0	k__Bacteria; p__Verrucomicrobia; c__Verrucomicrobiae; o__Verrucomicrobiales; f__Verrucomicrobiaceae; g__Akkermansia; s__Akkermansia_muciniphila
otu921	0.0	7.0	0.0	0.0	0.0	0.0	0.0	0.0	k__Bacteria; p__Bacteroidetes; c__Bacteroidia; o__Bacteroidales; f__S24-7; g__Unclassified_S24-7; s__Unclassified_S24-7
otu997	0.0	7.0	0.0	0.0	0.0	0.0	0.0	0.0	k__Bacteria; p__Firmicutes; c__Clostridia; o__Clostridiales; f__Unclassified_Clostridiales; g__Unclassified_Clostridiales; s__Unclassified_Clostridiales
otu998	0.0	7.0	0.0	0.0	0.0	0.0	0.0	0.0	k__Bacteria; p__Firmicutes; c__Bacilli; o__Lactobacillales; f__Lactobacillaceae; g__Lactobacillus; s__Unclassified_Lactobacillus
otu1005	4.0	0.0	0.0	0.0	0.0	3.0	0.0	0.0	k__Bacteria; p__Firmicutes; c__Clostridia; o__Clostridiales; f__Ruminococcaceae; g__Unclassified_Ruminococcaceae; s__Unclassified_Ruminococcaceae
otu1031	0.0	7.0	0.0	0.0	0.0	0.0	0.0	0.0	k__Bacteria; p__Firmicutes; c__Clostridia; o__Clostridiales; f__Unclassified_Clostridiales; g__Unclassified_Clostridiales; s__Unclassified_Clostridiales
otu1090	0.0	0.0	0.0	7.0	0.0	0.0	0.0	0.0	k__Bacteria; p__Firmicutes; c__Clostridia; o__Clostridiales; f__Lachnospiraceae; g__Unclassified_Lachnospiraceae; s__Unclassified_Lachnospiraceae
otu1095	0.0	0.0	0.0	7.0	0.0	0.0	0.0	0.0	k__Bacteria; p__Bacteroidetes; c__Bacteroidia; o__Bacteroidales; f__Bacteroidaceae; g__Bacteroides; s__Unclassified_Bacteroides
otu1232	0.0	0.0	0.0	0.0	0.0	7.0	0.0	0.0	k__Bacteria; p__Proteobacteria; c__Gammaproteobacteria; o__Pseudomonadales; f__Moraxellaceae; g__Enhydrobacter; s__Unclassified_Enhydrobacter
otu1253	0.0	7.0	0.0	0.0	0.0	0.0	0.0	0.0	k__Bacteria; p__Firmicutes; c__Clostridia; o__Clostridiales; f__Ruminococcaceae; g__Ruminococcus; s__Unclassified_Ruminococcus
otu1286	0.0	0.0	0.0	0.0	0.0	4.0	3.0	0.0	k__Bacteria; p__Bacteroidetes; c__Bacteroidia; o__Bacteroidales; f__Bacteroidaceae; g__Bacteroides; s__Unclassified_Bacteroides
otu1440	0.0	7.0	0.0	0.0	0.0	0.0	0.0	0.0	k__Bacteria; p__Firmicutes; c__Bacilli; o__Lactobacillales; f__Lactobacillaceae; g__Lactobacillus; s__Unclassified_Lactobacillus
otu1501	0.0	0.0	0.0	0.0	0.0	7.0	0.0	0.0	k__Bacteria; p__Proteobacteria; c__Gammaproteobacteria; o__Pseudomonadales; f__Moraxellaceae; g__Enhydrobacter; s__Unclassified_Enhydrobacter
otu1509	0.0	0.0	0.0	6.0	1.0	0.0	0.0	0.0	k__Bacteria; p__Firmicutes; c__Clostridia; o__Clostridiales; f__Lachnospiraceae; g__Unclassified_Lachnospiraceae; s__Unclassified_Lachnospiraceae
otu1553	0.0	0.0	0.0	7.0	0.0	0.0	0.0	0.0	k__Bacteria; p__Firmicutes; c__Clostridia; o__Clostridiales; f__Lachnospiraceae; g__Unclassified_Lachnospiraceae; s__Unclassified_Lachnospiraceae
otu1570	0.0	7.0	0.0	0.0	0.0	0.0	0.0	0.0	k__Bacteria; p__Firmicutes; c__Clostridia; o__Clostridiales; f__Lachnospiraceae; g__Unclassified_Lachnospiraceae; s__Unclassified_Lachnospiraceae
otu1632	0.0	0.0	0.0	7.0	0.0	0.0	0.0	0.0	k__Bacteria; p__Firmicutes; c__Clostridia; o__Clostridiales; f__Unclassified_Clostridiales; g__Unclassified_Clostridiales; s__Unclassified_Clostridiales
otu1686	0.0	0.0	0.0	0.0	2.0	0.0	0.0	5.0	k__Bacteria; p__Firmicutes; c__Bacilli; o__Lactobacillales; f__Enterococcaceae; g__Enterococcus; s__Unclassified_Enterococcus
otu1695	0.0	0.0	0.0	0.0	0.0	7.0	0.0	0.0	k__Bacteria; p__Firmicutes; c__Clostridia; o__Clostridiales; f__Unclassified_Clostridiales; g__Unclassified_Clostridiales; s__Unclassified_Clostridiales
otu1753	0.0	7.0	0.0	0.0	0.0	0.0	0.0	0.0	k__Bacteria; p__Bacteroidetes; c__Sphingobacteriia; o__Sphingobacteriales; f__Sphingobacteriaceae; g__Sphingobacterium; s__Sphingobacterium_multivorum
otu1828	0.0	0.0	0.0	0.0	0.0	7.0	0.0	0.0	k__Bacteria; p__Firmicutes; c__Clostridia; o__Clostridiales; f__Ruminococcaceae; g__Unclassified_Ruminococcaceae; s__Unclassified_Ruminococcaceae
otu1944	0.0	0.0	0.0	7.0	0.0	0.0	0.0	0.0	k__Bacteria; p__Firmicutes; c__Clostridia; o__Clostridiales; f__Unclassified_Clostridiales; g__Unclassified_Clostridiales; s__Unclassified_Clostridiales
otu1957	0.0	0.0	0.0	7.0	0.0	0.0	0.0	0.0	k__Bacteria; p__Bacteroidetes; c__Bacteroidia; o__Bacteroidales; f__Bacteroidaceae; g__Bacteroides; s__Unclassified_Bacteroides
otu1984	0.0	0.0	0.0	6.0	1.0	0.0	0.0	0.0	k__Bacteria; p__Firmicutes; c__Clostridia; o__Clostridiales; f__Unclassified_Clostridiales; g__Unclassified_Clostridiales; s__Unclassified_Clostridiales
otu2009	2.0	0.0	0.0	2.0	0.0	2.0	1.0	0.0	k__Bacteria; p__Bacteroidetes; c__Bacteroidia; o__Bacteroidales; f__Bacteroidaceae; g__Bacteroides; s__Unclassified_Bacteroides
otu2041	0.0	0.0	0.0	6.0	0.0	0.0	0.0	1.0	k__Bacteria; p__Bacteroidetes; c__Bacteroidia; o__Bacteroidales; f__Bacteroidaceae; g__Bacteroides; s__Unclassified_Bacteroides
otu2076	0.0	0.0	7.0	0.0	0.0	0.0	0.0	0.0	k__Bacteria; p__Actinobacteria; c__Acidimicrobiia; o__Acidimicrobiales; f__Unclassified_Acidimicrobiales; g__Unclassified_Acidimicrobiales; s__Unclassified_Acidimicrobiales
otu2186	0.0	0.0	0.0	0.0	0.0	7.0	0.0	0.0	k__Bacteria; p__Firmicutes; c__Clostridia; o__Clostridiales; f__Ruminococcaceae; g__Unclassified_Ruminococcaceae; s__Unclassified_Ruminococcaceae
otu2228	0.0	0.0	0.0	7.0	0.0	0.0	0.0	0.0	k__Bacteria; p__Firmicutes; c__Clostridia; o__Clostridiales; f__Lachnospiraceae; g__Unclassified_Lachnospiraceae; s__Unclassified_Lachnospiraceae
otu2232	0.0	7.0	0.0	0.0	0.0	0.0	0.0	0.0	k__Bacteria; p__Firmicutes; c__Clostridia; o__Clostridiales; f__Lachnospiraceae; g__Unclassified_Lachnospiraceae; s__Unclassified_Lachnospiraceae
otu2257	1.0	6.0	0.0	0.0	0.0	0.0	0.0	0.0	k__Bacteria; p__Proteobacteria; c__Alphaproteobacteria; o__Rhodospirillales; f__Rhodospirillaceae; g__Unclassified_Rhodospirillaceae; s__Unclassified_Rhodospirillaceae
otu2263	0.0	7.0	0.0	0.0	0.0	0.0	0.0	0.0	k__Bacteria; p__Firmicutes; c__Clostridia; o__Clostridiales; f__Ruminococcaceae; g__Unclassified_Ruminococcaceae; s__Unclassified_Ruminococcaceae
otu2291	0.0	7.0	0.0	0.0	0.0	0.0	0.0	0.0	k__Bacteria; p__Firmicutes; c__Clostridia; o__Clostridiales; f__Unclassified_Clostridiales; g__Unclassified_Clostridiales; s__Unclassified_Clostridiales
otu2506	7.0	0.0	0.0	0.0	0.0	0.0	0.0	0.0	k__Bacteria; p__Firmicutes; c__Bacilli; o__Lactobacillales; f__Unclassified_Lactobacillales; g__Unclassified_Lactobacillales; s__Unclassified_Lactobacillales
otu2526	0.0	7.0	0.0	0.0	0.0	0.0	0.0	0.0	k__Bacteria; p__Firmicutes; c__Clostridia; o__Clostridiales; f__Ruminococcaceae; g__Unclassified_Ruminococcaceae; s__Unclassified_Ruminococcaceae
otu2807	0.0	7.0	0.0	0.0	0.0	0.0	0.0	0.0	k__Bacteria; p__Acidobacteria; c__Solibacteres; o__Solibacterales; f__Unclassified_Solibacterales; g__Unclassified_Solibacterales; s__Unclassified_Solibacterales
otu2860	2.0	5.0	0.0	0.0	0.0	0.0	0.0	0.0	k__Bacteria; p__Firmicutes; c__Clostridia; o__Clostridiales; f__Lachnospiraceae; g__Blautia; s__Unclassified_Blautia
otu2882	0.0	1.0	1.0	4.0	0.0	0.0	0.0	1.0	k__Bacteria; p__Firmicutes; c__Clostridia; o__Clostridiales; f__Lachnospiraceae; g__[Ruminococcus]; s__[Ruminococcus]_gnavus
otu2915	0.0	7.0	0.0	0.0	0.0	0.0	0.0	0.0	k__Bacteria; p__Firmicutes; c__Clostridia; o__Clostridiales; f__Ruminococcaceae; g__Unclassified_Ruminococcaceae; s__Unclassified_Ruminococcaceae
otu2966	0.0	7.0	0.0	0.0	0.0	0.0	0.0	0.0	k__Bacteria; p__Firmicutes; c__Bacilli; o__Lactobacillales; f__Lactobacillaceae; g__Lactobacillus; s__Unclassified_Lactobacillus
otu2988	2.0	5.0	0.0	0.0	0.0	0.0	0.0	0.0	k__Bacteria; p__Proteobacteria; c__Gammaproteobacteria; o__Xanthomonadales; f__Sinobacteraceae; g__Steroidobacter; s__Unclassified_Steroidobacter
otu3059	0.0	7.0	0.0	0.0	0.0	0.0	0.0	0.0	k__Bacteria; p__Bacteroidetes; c__Bacteroidia; o__Bacteroidales; f__S24-7; g__Unclassified_S24-7; s__Unclassified_S24-7
otu3071	1.0	0.0	0.0	0.0	0.0	6.0	0.0	0.0	k__Bacteria; p__Firmicutes; c__Clostridia; o__Clostridiales; f__Lachnospiraceae; g__Unclassified_Lachnospiraceae; s__Unclassified_Lachnospiraceae
otu3156	0.0	7.0	0.0	0.0	0.0	0.0	0.0	0.0	k__Bacteria; p__Proteobacteria; c__Betaproteobacteria; o__Burkholderiales; f__Comamonadaceae; g__Acidovorax; s__Unclassified_Acidovorax
otu3189	0.0	7.0	0.0	0.0	0.0	0.0	0.0	0.0	k__Bacteria; p__Firmicutes; c__Clostridia; o__Clostridiales; f__Unclassified_Clostridiales; g__Unclassified_Clostridiales; s__Unclassified_Clostridiales
otu3201	5.0	2.0	0.0	0.0	0.0	0.0	0.0	0.0	k__Bacteria; p__Actinobacteria; c__Actinobacteria; o__Actinomycetales; f__Microbacteriaceae; g__Leucobacter; s__Unclassified_Leucobacter
otu3206	0.0	0.0	0.0	7.0	0.0	0.0	0.0	0.0	k__Bacteria; p__Firmicutes; c__Clostridia; o__Clostridiales; f__Veillonellaceae; g__Megamonas; s__Unclassified_Megamonas
otu3229	0.0	0.0	0.0	0.0	0.0	0.0	7.0	0.0	k__Bacteria; p__Firmicutes; c__Bacilli; o__Bacillales; f__Bacillaceae; g__Anaerobacillus; s__Unclassified_Anaerobacillus
otu3263	0.0	7.0	0.0	0.0	0.0	0.0	0.0	0.0	k__Bacteria; p__Bacteroidetes; c__Bacteroidia; o__Bacteroidales; f__S24-7; g__Unclassified_S24-7; s__Unclassified_S24-7
otu3321	0.0	0.0	0.0	0.0	0.0	7.0	0.0	0.0	k__Bacteria; p__Firmicutes; c__Clostridia; o__Clostridiales; f__Ruminococcaceae; g__Unclassified_Ruminococcaceae; s__Unclassified_Ruminococcaceae
otu3343	0.0	0.0	0.0	0.0	0.0	0.0	7.0	0.0	k__Bacteria; p__Bacteroidetes; c__Bacteroidia; o__Bacteroidales; f__Bacteroidaceae; g__Bacteroides; s__Unclassified_Bacteroides
otu3618	0.0	7.0	0.0	0.0	0.0	0.0	0.0	0.0	k__Bacteria; p__Firmicutes; c__Bacilli; o__Lactobacillales; f__Lactobacillaceae; g__Lactobacillus; s__Unclassified_Lactobacillus
otu3634	0.0	0.0	0.0	7.0	0.0	0.0	0.0	0.0	k__Bacteria; p__Firmicutes; c__Clostridia; o__Clostridiales; f__Lachnospiraceae; g__Unclassified_Lachnospiraceae; s__Unclassified_Lachnospiraceae
otu3716	0.0	0.0	0.0	7.0	0.0	0.0	0.0	0.0	k__Bacteria; p__Bacteroidetes; c__Bacteroidia; o__Bacteroidales; f__Bacteroidaceae; g__Bacteroides; s__Unclassified_Bacteroides
otu3759	0.0	7.0	0.0	0.0	0.0	0.0	0.0	0.0	k__Bacteria; p__Firmicutes; c__Bacilli; o__Lactobacillales; f__Lactobacillaceae; g__Lactobacillus; s__Unclassified_Lactobacillus
otu3783	5.0	2.0	0.0	0.0	0.0	0.0	0.0	0.0	k__Bacteria; p__Firmicutes; c__Clostridia; o__Clostridiales; f__Lachnospiraceae; g__Unclassified_Lachnospiraceae; s__Unclassified_Lachnospiraceae
otu3886	0.0	0.0	0.0	0.0	0.0	7.0	0.0	0.0	k__Bacteria; p__Firmicutes; c__Clostridia; o__Clostridiales; f__Lachnospiraceae; g__Unclassified_Lachnospiraceae; s__Unclassified_Lachnospiraceae
otu3918	0.0	0.0	0.0	7.0	0.0	0.0	0.0	0.0	k__Bacteria; p__Bacteroidetes; c__Bacteroidia; o__Bacteroidales; f__Bacteroidaceae; g__Bacteroides; s__Unclassified_Bacteroides
otu3987	0.0	0.0	0.0	7.0	0.0	0.0	0.0	0.0	k__Bacteria; p__Firmicutes; c__Erysipelotrichi; o__Erysipelotrichales; f__Erysipelotrichaceae; g__[Eubacterium]; s__[Eubacterium]_dolichum
otu4062	2.0	5.0	0.0	0.0	0.0	0.0	0.0	0.0	k__Bacteria; p__Proteobacteria; c__Deltaproteobacteria; o__Bdellovibrionales; f__Bdellovibrionaceae; g__Bdellovibrio; s__Unclassified_Bdellovibrio
otu4087	0.0	0.0	0.0	0.0	0.0	5.0	2.0	0.0	k__Bacteria; p__Firmicutes; c__Clostridia; o__Clostridiales; f__Lachnospiraceae; g__Unclassified_Lachnospiraceae; s__Unclassified_Lachnospiraceae
otu4093	0.0	7.0	0.0	0.0	0.0	0.0	0.0	0.0	k__Bacteria; p__Firmicutes; c__Clostridia; o__Clostridiales; f__Ruminococcaceae; g__Unclassified_Ruminococcaceae; s__Unclassified_Ruminococcaceae
otu4099	0.0	7.0	0.0	0.0	0.0	0.0	0.0	0.0	k__Bacteria; p__Firmicutes; c__Clostridia; o__Clostridiales; f__Ruminococcaceae; g__Unclassified_Ruminococcaceae; s__Unclassified_Ruminococcaceae
otu4115	0.0	0.0	0.0	0.0	7.0	0.0	0.0	0.0	k__Bacteria; p__Proteobacteria; c__Gammaproteobacteria; o__Enterobacteriales; f__Enterobacteriaceae; g__Klebsiella; s__Unclassified_Klebsiella
otu4139	0.0	0.0	0.0	0.0	1.0	0.0	2.0	4.0	k__Bacteria; p__Firmicutes; c__Bacilli; o__Lactobacillales; f__Enterococcaceae; g__Enterococcus; s__Unclassified_Enterococcus
otu4147	1.0	6.0	0.0	0.0	0.0	0.0	0.0	0.0	k__Bacteria; p__Cyanobacteria; c__4C0d-2; o__MLE1-12; f__Unclassified_MLE1-12; g__Unclassified_MLE1-12; s__Unclassified_MLE1-12
otu4150	0.0	7.0	0.0	0.0	0.0	0.0	0.0	0.0	k__Bacteria; p__Firmicutes; c__Bacilli; o__Lactobacillales; f__Lactobacillaceae; g__Lactobacillus; s__Unclassified_Lactobacillus
otu4279	0.0	0.0	0.0	5.0	0.0	2.0	0.0	0.0	k__Bacteria; p__Firmicutes; c__Clostridia; o__Clostridiales; f__Unclassified_Clostridiales; g__Unclassified_Clostridiales; s__Unclassified_Clostridiales
otu4340	0.0	0.0	0.0	0.0	7.0	0.0	0.0	0.0	k__Bacteria; p__Firmicutes; c__Erysipelotrichi; o__Erysipelotrichales; f__Erysipelotrichaceae; g__Unclassified_Erysipelotrichaceae; s__Unclassified_Erysipelotrichaceae
otu4351	0.0	0.0	0.0	0.0	0.0	1.0	0.0	6.0	k__Bacteria; p__Firmicutes; c__Clostridia; o__Clostridiales; f__Ruminococcaceae; g__Unclassified_Ruminococcaceae; s__Unclassified_Ruminococcaceae
otu4369	0.0	0.0	0.0	0.0	0.0	7.0	0.0	0.0	k__Bacteria; p__Firmicutes; c__Clostridia; o__Clostridiales; f__Lachnospiraceae; g__Unclassified_Lachnospiraceae; s__Unclassified_Lachnospiraceae
otu4380	0.0	7.0	0.0	0.0	0.0	0.0	0.0	0.0	k__Bacteria; p__Firmicutes; c__Clostridia; o__Clostridiales; f__Ruminococcaceae; g__Unclassified_Ruminococcaceae; s__Unclassified_Ruminococcaceae
otu4415	0.0	7.0	0.0	0.0	0.0	0.0	0.0	0.0	k__Bacteria; p__Bacteroidetes; c__Bacteroidia; o__Bacteroidales; f__S24-7; g__Unclassified_S24-7; s__Unclassified_S24-7
otu4440	0.0	7.0	0.0	0.0	0.0	0.0	0.0	0.0	k__Bacteria; p__Bacteroidetes; c__Bacteroidia; o__Bacteroidales; f__S24-7; g__Unclassified_S24-7; s__Unclassified_S24-7
otu4566	0.0	7.0	0.0	0.0	0.0	0.0	0.0	0.0	k__Bacteria; p__Acidobacteria; c__Solibacteres; o__Solibacterales; f__Unclassified_Solibacterales; g__Unclassified_Solibacterales; s__Unclassified_Solibacterales
otu4655	0.0	0.0	0.0	0.0	0.0	7.0	0.0	0.0	k__Bacteria; p__Firmicutes; c__Clostridia; o__Clostridiales; f__Ruminococcaceae; g__Unclassified_Ruminococcaceae; s__Unclassified_Ruminococcaceae
otu4676	0.0	0.0	0.0	0.0	0.0	2.0	5.0	0.0	k__Bacteria; p__Actinobacteria; c__Actinobacteria; o__Bifidobacteriales; f__Bifidobacteriaceae; g__Bifidobacterium; s__Unclassified_Bifidobacterium
otu4713	0.0	0.0	0.0	6.0	0.0	0.0	1.0	0.0	k__Bacteria; p__Firmicutes; c__Clostridia; o__Clostridiales; f__Lachnospiraceae; g__Unclassified_Lachnospiraceae; s__Unclassified_Lachnospiraceae
otu4770	0.0	0.0	0.0	7.0	0.0	0.0	0.0	0.0	k__Bacteria; p__Firmicutes; c__Clostridia; o__Clostridiales; f__Ruminococcaceae; g__Oscillospira; s__Unclassified_Oscillospira
otu4788	7.0	0.0	0.0	0.0	0.0	0.0	0.0	0.0	k__Bacteria; p__Proteobacteria; c__Alphaproteobacteria; o__Rhodobacterales; f__Rhodobacteraceae; g__Unclassified_Rhodobacteraceae; s__Unclassified_Rhodobacteraceae
otu4808	0.0	7.0	0.0	0.0	0.0	0.0	0.0	0.0	k__Bacteria; p__Bacteroidetes; c__Bacteroidia; o__Bacteroidales; f__Unclassified_Bacteroidales; g__Unclassified_Bacteroidales; s__Unclassified_Bacteroidales
otu4972	0.0	0.0	0.0	0.0	7.0	0.0	0.0	0.0	k__Bacteria; p__Firmicutes; c__Erysipelotrichi; o__Erysipelotrichales; f__Erysipelotrichaceae; g__Unclassified_Erysipelotrichaceae; s__Unclassified_Erysipelotrichaceae
otu5017	7.0	0.0	0.0	0.0	0.0	0.0	0.0	0.0	k__Bacteria; p__Proteobacteria; c__Betaproteobacteria; o__Burkholderiales; f__Comamonadaceae; g__Unclassified_Comamonadaceae; s__Unclassified_Comamonadaceae
otu5081	7.0	0.0	0.0	0.0	0.0	0.0	0.0	0.0	k__Bacteria; p__Firmicutes; c__Clostridia; o__Clostridiales; f__Ruminococcaceae; g__Unclassified_Ruminococcaceae; s__Unclassified_Ruminococcaceae
otu5199	0.0	7.0	0.0	0.0	0.0	0.0	0.0	0.0	k__Bacteria; p__Firmicutes; c__Clostridia; o__Clostridiales; f__Unclassified_Clostridiales; g__Unclassified_Clostridiales; s__Unclassified_Clostridiales
otu5203	0.0	7.0	0.0	0.0	0.0	0.0	0.0	0.0	k__Bacteria; p__Proteobacteria; c__Betaproteobacteria; o__Gallionellales; f__Gallionellaceae; g__Gallionella; s__Unclassified_Gallionella
otu5221	0.0	7.0	0.0	0.0	0.0	0.0	0.0	0.0	k__Bacteria; p__Firmicutes; c__Clostridia; o__Clostridiales; f__Unclassified_Clostridiales; g__Unclassified_Clostridiales; s__Unclassified_Clostridiales
otu5247	0.0	7.0	0.0	0.0	0.0	0.0	0.0	0.0	k__Bacteria; p__Bacteroidetes; c__Bacteroidia; o__Bacteroidales; f__Bacteroidaceae; g__Bacteroides; s__Bacteroides_ovatus
otu5268	0.0	7.0	0.0	0.0	0.0	0.0	0.0	0.0	k__Bacteria; p__Firmicutes; c__Bacilli; o__Bacillales; f__Bacillaceae; g__Bacillus; s__Unclassified_Bacillus
otu5371	0.0	0.0	1.0	1.0	0.0	2.0	3.0	0.0	k__Bacteria; p__Actinobacteria; c__Actinobacteria; o__Bifidobacteriales; f__Bifidobacteriaceae; g__Bifidobacterium; s__Bifidobacterium_longum
otu5390	0.0	0.0	0.0	0.0	0.0	0.0	7.0	0.0	k__Bacteria; p__Bacteroidetes; c__Bacteroidia; o__Bacteroidales; f__Bacteroidaceae; g__Bacteroides; s__Bacteroides_plebeius
otu5434	7.0	0.0	0.0	0.0	0.0	0.0	0.0	0.0	k__Bacteria; p__Proteobacteria; c__Gammaproteobacteria; o__Enterobacteriales; f__Enterobacteriaceae; g__Unclassified_Enterobacteriaceae; s__Unclassified_Enterobacteriaceae
otu5439	7.0	0.0	0.0	0.0	0.0	0.0	0.0	0.0	k__Bacteria; p__Firmicutes; c__Clostridia; o__Clostridiales; f__Ruminococcaceae; g__Unclassified_Ruminococcaceae; s__Unclassified_Ruminococcaceae
otu5484	0.0	0.0	0.0	7.0	0.0	0.0	0.0	0.0	k__Bacteria; p__Firmicutes; c__Clostridia; o__Clostridiales; f__Lachnospiraceae; g__Unclassified_Lachnospiraceae; s__Unclassified_Lachnospiraceae
otu5686	0.0	1.0	0.0	0.0	0.0	6.0	0.0	0.0	k__Bacteria; p__Firmicutes; c__Bacilli; o__Lactobacillales; f__Streptococcaceae; g__Streptococcus; s__Unclassified_Streptococcus
otu5713	0.0	0.0	0.0	7.0	0.0	0.0	0.0	0.0	k__Bacteria; p__Firmicutes; c__Clostridia; o__Clostridiales; f__Unclassified_Clostridiales; g__Unclassified_Clostridiales; s__Unclassified_Clostridiales
otu5727	0.0	7.0	0.0	0.0	0.0	0.0	0.0	0.0	k__Bacteria; p__Firmicutes; c__Clostridia; o__Clostridiales; f__[Mogibacteriaceae]; g__Unclassified_[Mogibacteriaceae]; s__Unclassified_[Mogibacteriaceae]
otu5728	0.0	7.0	0.0	0.0	0.0	0.0	0.0	0.0	k__Bacteria; p__Firmicutes; c__Clostridia; o__Clostridiales; f__Unclassified_Clostridiales; g__Unclassified_Clostridiales; s__Unclassified_Clostridiales
otu5892	0.0	0.0	0.0	0.0	0.0	1.0	6.0	0.0	k__Bacteria; p__Firmicutes; c__Clostridia; o__Clostridiales; f__Lachnospiraceae; g__Dorea; s__Unclassified_Dorea
otu5898	0.0	7.0	0.0	0.0	0.0	0.0	0.0	0.0	k__Bacteria; p__Bacteroidetes; c__Bacteroidia; o__Bacteroidales; f__S24-7; g__Unclassified_S24-7; s__Unclassified_S24-7
otu5943	0.0	7.0	0.0	0.0	0.0	0.0	0.0	0.0	k__Bacteria; p__Firmicutes; c__Clostridia; o__Clostridiales; f__Unclassified_Clostridiales; g__Unclassified_Clostridiales; s__Unclassified_Clostridiales
otu5970	0.0	7.0	0.0	0.0	0.0	0.0	0.0	0.0	k__Bacteria; p__Firmicutes; c__Clostridia; o__Clostridiales; f__Ruminococcaceae; g__Unclassified_Ruminococcaceae; s__Unclassified_Ruminococcaceae
otu5999	0.0	0.0	0.0	6.0	1.0	0.0	0.0	0.0	k__Bacteria; p__Bacteroidetes; c__Bacteroidia; o__Bacteroidales; f__Bacteroidaceae; g__Bacteroides; s__Unclassified_Bacteroides
otu6008	0.0	0.0	0.0	0.0	0.0	7.0	0.0	0.0	k__Bacteria; p__Firmicutes; c__Clostridia; o__Clostridiales; f__Ruminococcaceae; g__Ruminococcus; s__Unclassified_Ruminococcus
otu6116	0.0	7.0	0.0	0.0	0.0	0.0	0.0	0.0	k__Bacteria; p__Firmicutes; c__Clostridia; o__Clostridiales; f__Lachnospiraceae; g__Dorea; s__Unclassified_Dorea
otu6170	0.0	7.0	0.0	0.0	0.0	0.0	0.0	0.0	k__Bacteria; p__Synergistetes; c__Synergistia; o__Synergistales; f__Synergistaceae; g__Synergistes; s__Unclassified_Synergistes
otu6235	0.0	0.0	0.0	7.0	0.0	0.0	0.0	0.0	k__Bacteria; p__Firmicutes; c__Clostridia; o__Clostridiales; f__Unclassified_Clostridiales; g__Unclassified_Clostridiales; s__Unclassified_Clostridiales
otu6237	0.0	7.0	0.0	0.0	0.0	0.0	0.0	0.0	k__Bacteria; p__Bacteroidetes; c__Bacteroidia; o__Bacteroidales; f__S24-7; g__Unclassified_S24-7; s__Unclassified_S24-7
otu6243	0.0	7.0	0.0	0.0	0.0	0.0	0.0	0.0	k__Bacteria; p__Firmicutes; c__Clostridia; o__Clostridiales; f__Lachnospiraceae; g__Unclassified_Lachnospiraceae; s__Unclassified_Lachnospiraceae
otu6250	0.0	0.0	0.0	0.0	7.0	0.0	0.0	0.0	k__Bacteria; p__Proteobacteria; c__Gammaproteobacteria; o__Enterobacteriales; f__Enterobacteriaceae; g__Citrobacter; s__Unclassified_Citrobacter
otu6272	0.0	7.0	0.0	0.0	0.0	0.0	0.0	0.0	k__Bacteria; p__Firmicutes; c__Clostridia; o__Clostridiales; f__Christensenellaceae; g__Unclassified_Christensenellaceae; s__Unclassified_Christensenellaceae
otu6316	7.0	0.0	0.0	0.0	0.0	0.0	0.0	0.0	k__Bacteria; p__SAR406; c__AB16; o__ZA3648c; f__AEGEAN_185; g__Unclassified_AEGEAN_185; s__Unclassified_AEGEAN_185
otu6383	0.0	7.0	0.0	0.0	0.0	0.0	0.0	0.0	k__Bacteria; p__Firmicutes; c__Clostridia; o__Clostridiales; f__Ruminococcaceae; g__Ruminococcus; s__Unclassified_Ruminococcus
otu6389	0.0	0.0	0.0	7.0	0.0	0.0	0.0	0.0	k__Bacteria; p__Actinobacteria; c__Coriobacteriia; o__Coriobacteriales; f__Coriobacteriaceae; g__Enterococcus; s__Enterococcus_casseliflavus
otu6462	5.0	2.0	0.0	0.0	0.0	0.0	0.0	0.0	k__Bacteria; p__Actinobacteria; c__Actinobacteria; o__Actinomycetales; f__Streptomycetaceae; g__Streptomyces; s__Unclassified_Streptomyces
otu6504	0.0	7.0	0.0	0.0	0.0	0.0	0.0	0.0	k__Bacteria; p__Firmicutes; c__Bacilli; o__Lactobacillales; f__Lactobacillaceae; g__Lactobacillus; s__Unclassified_Lactobacillus
otu6566	0.0	7.0	0.0	0.0	0.0	0.0	0.0	0.0	k__Bacteria; p__Proteobacteria; c__Betaproteobacteria; o__Burkholderiales; f__Burkholderiaceae; g__Burkholderia; s__Unclassified_Burkholderia
otu6570	0.0	0.0	0.0	7.0	0.0	0.0	0.0	0.0	k__Bacteria; p__Firmicutes; c__Clostridia; o__Clostridiales; f__Lachnospiraceae; g__Dorea; s__Unclassified_Dorea
otu6595	0.0	0.0	0.0	6.0	0.0	0.0	0.0	1.0	k__Bacteria; p__Firmicutes; c__Clostridia; o__Clostridiales; f__Unclassified_Clostridiales; g__Unclassified_Clostridiales; s__Unclassified_Clostridiales
otu6605	7.0	0.0	0.0	0.0	0.0	0.0	0.0	0.0	k__Bacteria; p__Firmicutes; c__Clostridia; o__Clostridiales; f__Ruminococcaceae; g__Unclassified_Ruminococcaceae; s__Unclassified_Ruminococcaceae
otu6626	0.0	7.0	0.0	0.0	0.0	0.0	0.0	0.0	k__Bacteria; p__Firmicutes; c__Clostridia; o__Clostridiales; f__Unclassified_Clostridiales; g__Unclassified_Clostridiales; s__Unclassified_Clostridiales
otu6642	0.0	0.0	0.0	5.0	0.0	0.0	2.0	0.0	k__Bacteria; p__Firmicutes; c__Clostridia; o__Clostridiales; f__Lachnospiraceae; g__Unclassified_Lachnospiraceae; s__Unclassified_Lachnospiraceae
otu6675	2.0	5.0	0.0	0.0	0.0	0.0	0.0	0.0	k__Bacteria; p__Firmicutes; c__Clostridia; o__Clostridiales; f__Lachnospiraceae; g__Blautia; s__Blautia_producta
otu6677	0.0	7.0	0.0	0.0	0.0	0.0	0.0	0.0	k__Bacteria; p__Firmicutes; c__Clostridia; o__Clostridiales; f__Lachnospiraceae; g__Unclassified_Lachnospiraceae; s__Unclassified_Lachnospiraceae
otu6691	0.0	7.0	0.0	0.0	0.0	0.0	0.0	0.0	k__Bacteria; p__Bacteroidetes; c__Bacteroidia; o__Bacteroidales; f__S24-7; g__Unclassified_S24-7; s__Unclassified_S24-7
otu6693	1.0	6.0	0.0	0.0	0.0	0.0	0.0	0.0	k__Bacteria; p__Firmicutes; c__Clostridia; o__Clostridiales; f__Unclassified_Clostridiales; g__Unclassified_Clostridiales; s__Unclassified_Clostridiales
otu6702	1.0	6.0	0.0	0.0	0.0	0.0	0.0	0.0	k__Bacteria; p__Firmicutes; c__Clostridia; o__Clostridiales; f__Unclassified_Clostridiales; g__Unclassified_Clostridiales; s__Unclassified_Clostridiales
otu6734	0.0	0.0	0.0	0.0	0.0	5.0	2.0	0.0	k__Bacteria; p__Proteobacteria; c__Gammaproteobacteria; o__Enterobacteriales; f__Enterobacteriaceae; g__Unclassified_Enterobacteriaceae; s__Unclassified_Enterobacteriaceae
otu6746	0.0	7.0	0.0	0.0	0.0	0.0	0.0	0.0	k__Bacteria; p__Firmicutes; c__Clostridia; o__Clostridiales; f__Unclassified_Clostridiales; g__Unclassified_Clostridiales; s__Unclassified_Clostridiales
otu6941	0.0	7.0	0.0	0.0	0.0	0.0	0.0	0.0	k__Bacteria; p__Proteobacteria; c__Gammaproteobacteria; o__Pseudomonadales; f__Pseudomonadaceae; g__Pseudomonas; s__Pseudomonas_balearica
otu6975	0.0	7.0	0.0	0.0	0.0	0.0	0.0	0.0	k__Bacteria; p__Proteobacteria; c__Alphaproteobacteria; o__Rhodobacterales; f__Hyphomonadaceae; g__Hyphomonas; s__Unclassified_Hyphomonas
otu6982	6.0	0.0	0.0	0.0	0.0	1.0	0.0	0.0	k__Bacteria; p__Firmicutes; c__Clostridia; o__Clostridiales; f__Lachnospiraceae; g__Lachnospira; s__Unclassified_Lachnospira
otu6990	0.0	7.0	0.0	0.0	0.0	0.0	0.0	0.0	k__Bacteria; p__Firmicutes; c__Clostridia; o__Clostridiales; f__Unclassified_Clostridiales; g__Unclassified_Clostridiales; s__Unclassified_Clostridiales
otu7037	7.0	0.0	0.0	0.0	0.0	0.0	0.0	0.0	k__Bacteria; p__Cyanobacteria; c__Chloroplast; o__Streptophyta; f__Unclassified_Streptophyta; g__Unclassified_Streptophyta; s__Unclassified_Streptophyta
otu7096	0.0	0.0	0.0	0.0	0.0	7.0	0.0	0.0	k__Bacteria; p__Firmicutes; c__Clostridia; o__Clostridiales; f__Ruminococcaceae; g__Unclassified_Ruminococcaceae; s__Unclassified_Ruminococcaceae
otu7108	0.0	0.0	0.0	0.0	0.0	7.0	0.0	0.0	k__Bacteria; p__Firmicutes; c__Clostridia; o__Clostridiales; f__Lachnospiraceae; g__[Ruminococcus]; s__Unclassified_[Ruminococcus]
otu7172	5.0	2.0	0.0	0.0	0.0	0.0	0.0	0.0	k__Bacteria; p__Bacteroidetes; c__[Saprospirae]; o__[Saprospirales]; f__Chitinophagaceae; g__Sediminibacterium; s__Unclassified_Sediminibacterium
otu7225	0.0	0.0	0.0	0.0	1.0	0.0	6.0	0.0	k__Bacteria; p__Firmicutes; c__Bacilli; o__Lactobacillales; f__Enterococcaceae; g__Enterococcus; s__Unclassified_Enterococcus
otu7272	0.0	0.0	0.0	0.0	0.0	7.0	0.0	0.0	k__Bacteria; p__Firmicutes; c__Clostridia; o__Clostridiales; f__Ruminococcaceae; g__Unclassified_Ruminococcaceae; s__Unclassified_Ruminococcaceae
otu7311	3.0	1.0	0.0	0.0	0.0	1.0	2.0	0.0	k__Bacteria; p__Proteobacteria; c__Betaproteobacteria; o__Burkholderiales; f__Comamonadaceae; g__Comamonas; s__Unclassified_Comamonas
otu7318	0.0	0.0	1.0	3.0	0.0	0.0	3.0	0.0	k__Bacteria; p__Bacteroidetes; c__Bacteroidia; o__Bacteroidales; f__Bacteroidaceae; g__Bacteroides; s__Unclassified_Bacteroides
otu7333	2.0	5.0	0.0	0.0	0.0	0.0	0.0	0.0	k__Bacteria; p__Firmicutes; c__Bacilli; o__Lactobacillales; f__Lactobacillaceae; g__Unclassified_Lactobacillaceae; s__Unclassified_Lactobacillaceae
otu7357	0.0	4.0	0.0	0.0	0.0	3.0	0.0	0.0	k__Bacteria; p__Firmicutes; c__Clostridia; o__Clostridiales; f__Ruminococcaceae; g__Unclassified_Ruminococcaceae; s__Unclassified_Ruminococcaceae
otu7420	0.0	7.0	0.0	0.0	0.0	0.0	0.0	0.0	k__Bacteria; p__Bacteroidetes; c__Bacteroidia; o__Bacteroidales; f__S24-7; g__Unclassified_S24-7; s__Unclassified_S24-7
otu7448	0.0	0.0	0.0	2.0	5.0	0.0	0.0	0.0	k__Bacteria; p__Firmicutes; c__Clostridia; o__Clostridiales; f__Lachnospiraceae; g__Unclassified_Lachnospiraceae; s__Unclassified_Lachnospiraceae
otu7504	0.0	0.0	0.0	7.0	0.0	0.0	0.0	0.0	k__Bacteria; p__Firmicutes; c__Clostridia; o__Clostridiales; f__Lachnospiraceae; g__Unclassified_Lachnospiraceae; s__Unclassified_Lachnospiraceae
otu7529	0.0	7.0	0.0	0.0	0.0	0.0	0.0	0.0	k__Bacteria; p__Bacteroidetes; c__Bacteroidia; o__Bacteroidales; f__S24-7; g__Unclassified_S24-7; s__Unclassified_S24-7
otu7532	0.0	7.0	0.0	0.0	0.0	0.0	0.0	0.0	k__Bacteria; p__Firmicutes; c__Clostridia; o__Clostridiales; f__Unclassified_Clostridiales; g__Unclassified_Clostridiales; s__Unclassified_Clostridiales
otu7557	7.0	0.0	0.0	0.0	0.0	0.0	0.0	0.0	k__Bacteria; p__Actinobacteria; c__Actinobacteria; o__Actinomycetales; f__Pseudonocardiaceae; g__Saccharomonospora; s__Unclassified_Saccharomonospora
otu7570	7.0	0.0	0.0	0.0	0.0	0.0	0.0	0.0	k__Bacteria; p__Proteobacteria; c__Alphaproteobacteria; o__Rhizobiales; f__Methylobacteriaceae; g__Methylobacterium; s__Methylobacterium_komagatae
otu7729	0.0	0.0	0.0	0.0	0.0	7.0	0.0	0.0	k__Bacteria; p__Actinobacteria; c__Coriobacteriia; o__Coriobacteriales; f__Coriobacteriaceae; g__Unclassified_Coriobacteriaceae; s__Unclassified_Coriobacteriaceae
otu7771	7.0	0.0	0.0	0.0	0.0	0.0	0.0	0.0	k__Bacteria; p__Bacteroidetes; c__Bacteroidia; o__Bacteroidales; f__Bacteroidaceae; g__Bacteroides; s__Unclassified_Bacteroides
otu7782	0.0	0.0	0.0	0.0	0.0	0.0	7.0	0.0	k__Bacteria; p__Proteobacteria; c__Gammaproteobacteria; o__Enterobacteriales; f__Enterobacteriaceae; g__Unclassified_Enterobacteriaceae; s__Unclassified_Enterobacteriaceae
otu16	0.0	5.0	0.0	0.0	0.0	1.0	0.0	0.0	k__Bacteria; p__Firmicutes; c__Clostridia; o__Clostridiales; f__Clostridiaceae; g__Unclassified_Clostridiaceae; s__Unclassified_Clostridiaceae
otu33	0.0	6.0	0.0	0.0	0.0	0.0	0.0	0.0	k__Bacteria; p__Firmicutes; c__Clostridia; o__Clostridiales; f__Ruminococcaceae; g__Unclassified_Ruminococcaceae; s__Unclassified_Ruminococcaceae
otu124	6.0	0.0	0.0	0.0	0.0	0.0	0.0	0.0	k__Bacteria; p__Firmicutes; c__Clostridia; o__Clostridiales; f__Ruminococcaceae; g__Unclassified_Ruminococcaceae; s__Unclassified_Ruminococcaceae
otu143	0.0	0.0	0.0	1.0	0.0	5.0	0.0	0.0	k__Bacteria; p__Firmicutes; c__Clostridia; o__Clostridiales; f__Lachnospiraceae; g__Unclassified_Lachnospiraceae; s__Unclassified_Lachnospiraceae
otu149	0.0	3.0	3.0	0.0	0.0	0.0	0.0	0.0	k__Bacteria; p__Firmicutes; c__Clostridia; o__Clostridiales; f__Unclassified_Clostridiales; g__Unclassified_Clostridiales; s__Unclassified_Clostridiales
otu166	0.0	0.0	0.0	6.0	0.0	0.0	0.0	0.0	k__Bacteria; p__Bacteroidetes; c__Bacteroidia; o__Bacteroidales; f__Bacteroidaceae; g__Bacteroides; s__Unclassified_Bacteroides
otu179	0.0	6.0	0.0	0.0	0.0	0.0	0.0	0.0	k__Bacteria; p__Firmicutes; c__Bacilli; o__Lactobacillales; f__Lactobacillaceae; g__Lactobacillus; s__Unclassified_Lactobacillus
otu245	1.0	0.0	0.0	3.0	0.0	2.0	0.0	0.0	k__Bacteria; p__Bacteroidetes; c__Bacteroidia; o__Bacteroidales; f__Bacteroidaceae; g__Bacteroides; s__Unclassified_Bacteroides
otu525	0.0	6.0	0.0	0.0	0.0	0.0	0.0	0.0	k__Bacteria; p__Firmicutes; c__Clostridia; o__Clostridiales; f__Ruminococcaceae; g__Ruminococcus; s__Unclassified_Ruminococcus
otu536	0.0	6.0	0.0	0.0	0.0	0.0	0.0	0.0	k__Bacteria; p__Bacteroidetes; c__Bacteroidia; o__Bacteroidales; f__S24-7; g__Unclassified_S24-7; s__Unclassified_S24-7
otu542	0.0	0.0	0.0	2.0	3.0	1.0	0.0	0.0	k__Bacteria; p__Actinobacteria; c__Coriobacteriia; o__Coriobacteriales; f__Coriobacteriaceae; g__Eggerthella; s__Eggerthella_lenta
otu545	0.0	6.0	0.0	0.0	0.0	0.0	0.0	0.0	k__Bacteria; p__Bacteroidetes; c__Bacteroidia; o__Bacteroidales; f__Porphyromonadaceae; g__Parabacteroides; s__Unclassified_Parabacteroides
otu551	0.0	0.0	6.0	0.0	0.0	0.0	0.0	0.0	k__Bacteria; p__Bacteroidetes; c__Bacteroidia; o__Bacteroidales; f__Bacteroidaceae; g__Bacteroides; s__Unclassified_Bacteroides
otu595	0.0	6.0	0.0	0.0	0.0	0.0	0.0	0.0	k__Bacteria; p__Bacteroidetes; c__Cytophagia; o__Cytophagales; f__Cytophagaceae; g__Unclassified_Cytophagaceae; s__Unclassified_Cytophagaceae
otu628	0.0	0.0	0.0	0.0	0.0	1.0	5.0	0.0	k__Bacteria; p__Proteobacteria; c__Gammaproteobacteria; o__Enterobacteriales; f__Enterobacteriaceae; g__Unclassified_Enterobacteriaceae; s__Unclassified_Enterobacteriaceae
otu663	0.0	6.0	0.0	0.0	0.0	0.0	0.0	0.0	k__Bacteria; p__Firmicutes; c__Erysipelotrichi; o__Erysipelotrichales; f__Erysipelotrichaceae; g__RFN20; s__Unclassified_RFN20
otu671	0.0	6.0	0.0	0.0	0.0	0.0	0.0	0.0	k__Bacteria; p__Firmicutes; c__Clostridia; o__Clostridiales; f__Lachnospiraceae; g__Blautia; s__Unclassified_Blautia
otu731	0.0	6.0	0.0	0.0	0.0	0.0	0.0	0.0	k__Bacteria; p__Firmicutes; c__Bacilli; o__Lactobacillales; f__Enterococcaceae; g__Enterococcus; s__Unclassified_Enterococcus
otu809	3.0	0.0	0.0	0.0	0.0	0.0	0.0	3.0	k__Bacteria; p__Bacteroidetes; c__Bacteroidia; o__Bacteroidales; f__Bacteroidaceae; g__Bacteroides; s__Bacteroides_fragilis
otu857	0.0	0.0	0.0	3.0	3.0	0.0	0.0	0.0	k__Bacteria; p__Firmicutes; c__Clostridia; o__Clostridiales; f__Ruminococcaceae; g__Oscillospira; s__Unclassified_Oscillospira
otu873	0.0	0.0	0.0	0.0	6.0	0.0	0.0	0.0	k__Bacteria; p__Proteobacteria; c__Gammaproteobacteria; o__Aeromonadales; f__Aeromonadaceae; g__Unclassified_Aeromonadaceae; s__Unclassified_Aeromonadaceae
otu899	4.0	2.0	0.0	0.0	0.0	0.0	0.0	0.0	k__Bacteria; p__Bacteroidetes; c__Bacteroidia; o__Bacteroidales; f__Bacteroidaceae; g__Bacteroides; s__Unclassified_Bacteroides
otu932	0.0	6.0	0.0	0.0	0.0	0.0	0.0	0.0	k__Bacteria; p__Firmicutes; c__Bacilli; o__Lactobacillales; f__Lactobacillaceae; g__Lactobacillus; s__Unclassified_Lactobacillus
otu945	0.0	6.0	0.0	0.0	0.0	0.0	0.0	0.0	k__Bacteria; p__Firmicutes; c__Clostridia; o__Clostridiales; f__Unclassified_Clostridiales; g__Unclassified_Clostridiales; s__Unclassified_Clostridiales
otu956	0.0	0.0	0.0	0.0	0.0	6.0	0.0	0.0	k__Bacteria; p__Firmicutes; c__Clostridia; o__Clostridiales; f__Lachnospiraceae; g__Blautia; s__Blautia_producta
otu1001	0.0	0.0	0.0	0.0	0.0	6.0	0.0	0.0	k__Bacteria; p__Firmicutes; c__Clostridia; o__Clostridiales; f__Lachnospiraceae; g__Roseburia; s__Unclassified_Roseburia
otu1020	0.0	6.0	0.0	0.0	0.0	0.0	0.0	0.0	k__Bacteria; p__Firmicutes; c__Erysipelotrichi; o__Erysipelotrichales; f__Erysipelotrichaceae; g__Allobaculum; s__Unclassified_Allobaculum
otu1035	0.0	0.0	0.0	0.0	6.0	0.0	0.0	0.0	k__Bacteria; p__Proteobacteria; c__Gammaproteobacteria; o__Enterobacteriales; f__Enterobacteriaceae; g__Unclassified_Enterobacteriaceae; s__Unclassified_Enterobacteriaceae
otu1042	0.0	6.0	0.0	0.0	0.0	0.0	0.0	0.0	k__Bacteria; p__Bacteroidetes; c__Bacteroidia; o__Bacteroidales; f__Prevotellaceae; g__Prevotella; s__Unclassified_Prevotella
otu1062	0.0	6.0	0.0	0.0	0.0	0.0	0.0	0.0	k__Bacteria; p__Bacteroidetes; c__Bacteroidia; o__Bacteroidales; f__S24-7; g__Unclassified_S24-7; s__Unclassified_S24-7
otu1098	0.0	0.0	0.0	0.0	6.0	0.0	0.0	0.0	k__Bacteria; p__Firmicutes; c__Clostridia; o__Clostridiales; f__Ruminococcaceae; g__Oscillospira; s__Unclassified_Oscillospira
otu1131	0.0	6.0	0.0	0.0	0.0	0.0	0.0	0.0	k__Bacteria; p__Firmicutes; c__Clostridia; o__Clostridiales; f__Unclassified_Clostridiales; g__Unclassified_Clostridiales; s__Unclassified_Clostridiales
otu1184	0.0	0.0	0.0	2.0	0.0	0.0	0.0	4.0	k__Bacteria; p__Firmicutes; c__Clostridia; o__Clostridiales; f__Lachnospiraceae; g__Dorea; s__Unclassified_Dorea
otu1194	0.0	6.0	0.0	0.0	0.0	0.0	0.0	0.0	k__Bacteria; p__Firmicutes; c__Bacilli; o__Lactobacillales; f__Lactobacillaceae; g__Lactobacillus; s__Unclassified_Lactobacillus
otu1240	0.0	0.0	0.0	0.0	0.0	6.0	0.0	0.0	k__Bacteria; p__Firmicutes; c__Bacilli; o__Gemellales; f__Gemellaceae; g__Unclassified_Gemellaceae; s__Unclassified_Gemellaceae
otu1269	4.0	1.0	0.0	0.0	0.0	0.0	1.0	0.0	k__Bacteria; p__Firmicutes; c__Clostridia; o__Clostridiales; f__Lachnospiraceae; g__Unclassified_Lachnospiraceae; s__Unclassified_Lachnospiraceae
otu1281	0.0	0.0	0.0	6.0	0.0	0.0	0.0	0.0	k__Bacteria; p__Firmicutes; c__Clostridia; o__Clostridiales; f__Lachnospiraceae; g__[Ruminococcus]; s__[Ruminococcus]_gnavus
otu1319	6.0	0.0	0.0	0.0	0.0	0.0	0.0	0.0	k__Bacteria; p__Actinobacteria; c__Actinobacteria; o__Actinomycetales; f__Unclassified_Actinomycetales; g__Unclassified_Actinomycetales; s__Unclassified_Actinomycetales
otu1364	0.0	0.0	0.0	0.0	0.0	6.0	0.0	0.0	k__Bacteria; p__Firmicutes; c__Clostridia; o__Clostridiales; f__Lachnospiraceae; g__Dorea; s__Unclassified_Dorea
otu1386	0.0	0.0	0.0	0.0	6.0	0.0	0.0	0.0	k__Bacteria; p__Proteobacteria; c__Gammaproteobacteria; o__Enterobacteriales; f__Enterobacteriaceae; g__Citrobacter; s__Unclassified_Citrobacter
otu1585	0.0	6.0	0.0	0.0	0.0	0.0	0.0	0.0	k__Bacteria; p__Firmicutes; c__Clostridia; o__Clostridiales; f__Unclassified_Clostridiales; g__Unclassified_Clostridiales; s__Unclassified_Clostridiales
otu1612	0.0	6.0	0.0	0.0	0.0	0.0	0.0	0.0	k__Bacteria; p__Firmicutes; c__Clostridia; o__Clostridiales; f__Unclassified_Clostridiales; g__Unclassified_Clostridiales; s__Unclassified_Clostridiales
otu1628	0.0	0.0	0.0	0.0	6.0	0.0	0.0	0.0	k__Bacteria; p__Proteobacteria; c__Gammaproteobacteria; o__Enterobacteriales; f__Enterobacteriaceae; g__Unclassified_Enterobacteriaceae; s__Unclassified_Enterobacteriaceae
otu1648	6.0	0.0	0.0	0.0	0.0	0.0	0.0	0.0	k__Bacteria; p__Acidobacteria; c__[Chloracidobacteria]; o__RB41; f__Unclassified_RB41; g__Unclassified_RB41; s__Unclassified_RB41
otu1661	0.0	0.0	0.0	6.0	0.0	0.0	0.0	0.0	k__Bacteria; p__Firmicutes; c__Clostridia; o__Clostridiales; f__Veillonellaceae; g__Megamonas; s__Unclassified_Megamonas
otu1725	3.0	3.0	0.0	0.0	0.0	0.0	0.0	0.0	k__Bacteria; p__Firmicutes; c__Bacilli; o__Lactobacillales; f__Lactobacillaceae; g__Lactobacillus; s__Unclassified_Lactobacillus
otu1750	0.0	0.0	0.0	4.0	0.0	1.0	1.0	0.0	k__Bacteria; p__Firmicutes; c__Clostridia; o__Clostridiales; f__Lachnospiraceae; g__Dorea; s__Unclassified_Dorea
otu1800	0.0	0.0	0.0	0.0	0.0	6.0	0.0	0.0	k__Bacteria; p__Firmicutes; c__Clostridia; o__Clostridiales; f__Lachnospiraceae; g__Roseburia; s__Unclassified_Roseburia
otu1861	0.0	0.0	0.0	6.0	0.0	0.0	0.0	0.0	k__Bacteria; p__Firmicutes; c__Clostridia; o__Clostridiales; f__Lachnospiraceae; g__Unclassified_Lachnospiraceae; s__Unclassified_Lachnospiraceae
otu1986	0.0	6.0	0.0	0.0	0.0	0.0	0.0	0.0	k__Bacteria; p__Proteobacteria; c__Alphaproteobacteria; o__Rhodospirillales; f__Unclassified_Rhodospirillales; g__Unclassified_Rhodospirillales; s__Unclassified_Rhodospirillales
otu2019	0.0	6.0	0.0	0.0	0.0	0.0	0.0	0.0	k__Bacteria; p__Firmicutes; c__Clostridia; o__Clostridiales; f__Lachnospiraceae; g__Unclassified_Lachnospiraceae; s__Unclassified_Lachnospiraceae
otu2020	0.0	0.0	0.0	1.0	0.0	1.0	4.0	0.0	k__Bacteria; p__Firmicutes; c__Clostridia; o__Clostridiales; f__Ruminococcaceae; g__Unclassified_Ruminococcaceae; s__Unclassified_Ruminococcaceae
otu2128	6.0	0.0	0.0	0.0	0.0	0.0	0.0	0.0	k__Bacteria; p__NC10; c__12-24; o__JH-WHS47; f__Unclassified_JH-WHS47; g__Unclassified_JH-WHS47; s__Unclassified_JH-WHS47
otu2245	0.0	0.0	0.0	1.0	5.0	0.0	0.0	0.0	k__Bacteria; p__Firmicutes; c__Erysipelotrichi; o__Erysipelotrichales; f__Erysipelotrichaceae; g__Unclassified_Erysipelotrichaceae; s__Unclassified_Erysipelotrichaceae
otu2254	6.0	0.0	0.0	0.0	0.0	0.0	0.0	0.0	k__Bacteria; p__Firmicutes; c__Erysipelotrichi; o__Erysipelotrichales; f__Erysipelotrichaceae; g__Allobaculum; s__Unclassified_Allobaculum
otu2269	0.0	6.0	0.0	0.0	0.0	0.0	0.0	0.0	k__Bacteria; p__Firmicutes; c__Bacilli; o__Lactobacillales; f__Lactobacillaceae; g__Lactobacillus; s__Unclassified_Lactobacillus
otu2321	0.0	6.0	0.0	0.0	0.0	0.0	0.0	0.0	k__Bacteria; p__Firmicutes; c__Clostridia; o__Clostridiales; f__Clostridiaceae; g__Unclassified_Clostridiaceae; s__Unclassified_Clostridiaceae
otu2343	0.0	6.0	0.0	0.0	0.0	0.0	0.0	0.0	k__Bacteria; p__Firmicutes; c__Clostridia; o__Clostridiales; f__Unclassified_Clostridiales; g__Unclassified_Clostridiales; s__Unclassified_Clostridiales
otu2378	0.0	0.0	0.0	0.0	6.0	0.0	0.0	0.0	k__Bacteria; p__Proteobacteria; c__Gammaproteobacteria; o__Enterobacteriales; f__Enterobacteriaceae; g__Unclassified_Enterobacteriaceae; s__Unclassified_Enterobacteriaceae
otu2379	0.0	0.0	0.0	6.0	0.0	0.0	0.0	0.0	k__Bacteria; p__Firmicutes; c__Clostridia; o__Clostridiales; f__Lachnospiraceae; g__[Ruminococcus]; s__[Ruminococcus]_gnavus
otu2400	0.0	6.0	0.0	0.0	0.0	0.0	0.0	0.0	k__Bacteria; p__Firmicutes; c__Bacilli; o__Lactobacillales; f__Lactobacillaceae; g__Lactobacillus; s__Unclassified_Lactobacillus
otu2452	0.0	0.0	0.0	0.0	0.0	0.0	6.0	0.0	k__Bacteria; p__Proteobacteria; c__Gammaproteobacteria; o__Enterobacteriales; f__Enterobacteriaceae; g__Unclassified_Enterobacteriaceae; s__Unclassified_Enterobacteriaceae
otu2505	0.0	0.0	0.0	6.0	0.0	0.0	0.0	0.0	k__Bacteria; p__Firmicutes; c__Clostridia; o__Clostridiales; f__Lachnospiraceae; g__[Ruminococcus]; s__[Ruminococcus]_gnavus
otu2579	0.0	0.0	0.0	0.0	0.0	6.0	0.0	0.0	k__Bacteria; p__Firmicutes; c__Clostridia; o__Clostridiales; f__Lachnospiraceae; g__Unclassified_Lachnospiraceae; s__Unclassified_Lachnospiraceae
otu2754	0.0	6.0	0.0	0.0	0.0	0.0	0.0	0.0	k__Bacteria; p__Bacteroidetes; c__Bacteroidia; o__Bacteroidales; f__S24-7; g__Unclassified_S24-7; s__Unclassified_S24-7
otu2759	0.0	0.0	0.0	0.0	3.0	0.0	1.0	2.0	k__Bacteria; p__Firmicutes; c__Clostridia; o__Clostridiales; f__Ruminococcaceae; g__Unclassified_Ruminococcaceae; s__Unclassified_Ruminococcaceae
otu2840	0.0	0.0	0.0	0.0	0.0	6.0	0.0	0.0	k__Bacteria; p__Firmicutes; c__Clostridia; o__Clostridiales; f__Lachnospiraceae; g__Unclassified_Lachnospiraceae; s__Unclassified_Lachnospiraceae
otu2843	0.0	6.0	0.0	0.0	0.0	0.0	0.0	0.0	k__Bacteria; p__Firmicutes; c__Bacilli; o__Lactobacillales; f__Lactobacillaceae; g__Lactobacillus; s__Unclassified_Lactobacillus
otu2846	0.0	0.0	0.0	5.0	0.0	0.0	1.0	0.0	k__Bacteria; p__Firmicutes; c__Clostridia; o__Clostridiales; f__Unclassified_Clostridiales; g__Unclassified_Clostridiales; s__Unclassified_Clostridiales
otu2875	0.0	0.0	0.0	4.0	1.0	1.0	0.0	0.0	k__Bacteria; p__Firmicutes; c__Clostridia; o__Clostridiales; f__Lachnospiraceae; g__[Ruminococcus]; s__[Ruminococcus]_gnavus
otu2890	0.0	0.0	0.0	6.0	0.0	0.0	0.0	0.0	k__Bacteria; p__Firmicutes; c__Clostridia; o__Clostridiales; f__Lachnospiraceae; g__[Ruminococcus]; s__[Ruminococcus]_gnavus
otu2916	0.0	6.0	0.0	0.0	0.0	0.0	0.0	0.0	k__Bacteria; p__Firmicutes; c__Clostridia; o__Clostridiales; f__Christensenellaceae; g__Unclassified_Christensenellaceae; s__Unclassified_Christensenellaceae
otu2919	0.0	0.0	0.0	0.0	0.0	6.0	0.0	0.0	k__Bacteria; p__Firmicutes; c__Clostridia; o__Clostridiales; f__Lachnospiraceae; g__Unclassified_Lachnospiraceae; s__Unclassified_Lachnospiraceae
otu2935	6.0	0.0	0.0	0.0	0.0	0.0	0.0	0.0	k__Bacteria; p__Planctomycetes; c__Planctomycetia; o__Gemmatales; f__Isosphaeraceae; g__Unclassified_Isosphaeraceae; s__Unclassified_Isosphaeraceae
otu3018	0.0	0.0	0.0	0.0	0.0	6.0	0.0	0.0	k__Bacteria; p__Firmicutes; c__Clostridia; o__Clostridiales; f__Lachnospiraceae; g__Unclassified_Lachnospiraceae; s__Unclassified_Lachnospiraceae
otu3031	0.0	6.0	0.0	0.0	0.0	0.0	0.0	0.0	k__Bacteria; p__Firmicutes; c__Clostridia; o__Clostridiales; f__Unclassified_Clostridiales; g__Unclassified_Clostridiales; s__Unclassified_Clostridiales
otu3039	0.0	6.0	0.0	0.0	0.0	0.0	0.0	0.0	k__Bacteria; p__Firmicutes; c__Bacilli; o__Lactobacillales; f__Lactobacillaceae; g__Lactobacillus; s__Unclassified_Lactobacillus
otu3041	0.0	0.0	0.0	2.0	0.0	4.0	0.0	0.0	k__Bacteria; p__Bacteroidetes; c__Bacteroidia; o__Bacteroidales; f__Bacteroidaceae; g__Bacteroides; s__Unclassified_Bacteroides
otu3084	0.0	6.0	0.0	0.0	0.0	0.0	0.0	0.0	k__Bacteria; p__Cyanobacteria; c__4C0d-2; o__MLE1-12; f__Unclassified_MLE1-12; g__Unclassified_MLE1-12; s__Unclassified_MLE1-12
otu3292	0.0	0.0	0.0	5.0	0.0	0.0	1.0	0.0	k__Bacteria; p__Firmicutes; c__Clostridia; o__Clostridiales; f__Lachnospiraceae; g__Unclassified_Lachnospiraceae; s__Unclassified_Lachnospiraceae
otu3302	1.0	0.0	0.0	0.0	0.0	2.0	3.0	0.0	k__Bacteria; p__Firmicutes; c__Clostridia; o__Clostridiales; f__Ruminococcaceae; g__Unclassified_Ruminococcaceae; s__Unclassified_Ruminococcaceae
otu3316	0.0	0.0	0.0	1.0	0.0	0.0	4.0	1.0	k__Bacteria; p__Actinobacteria; c__Actinobacteria; o__Actinomycetales; f__Micrococcaceae; g__Rothia; s__Rothia_mucilaginosa
otu3323	0.0	0.0	0.0	6.0	0.0	0.0	0.0	0.0	k__Bacteria; p__Firmicutes; c__Clostridia; o__Clostridiales; f__Lachnospiraceae; g__Clostridium; s__Clostridium_hathewayi
otu3361	0.0	0.0	0.0	6.0	0.0	0.0	0.0	0.0	k__Bacteria; p__Bacteroidetes; c__Bacteroidia; o__Bacteroidales; f__Bacteroidaceae; g__Bacteroides; s__Unclassified_Bacteroides
otu3396	0.0	6.0	0.0	0.0	0.0	0.0	0.0	0.0	k__Bacteria; p__Firmicutes; c__Clostridia; o__Clostridiales; f__Unclassified_Clostridiales; g__Unclassified_Clostridiales; s__Unclassified_Clostridiales
otu3407	0.0	6.0	0.0	0.0	0.0	0.0	0.0	0.0	k__Bacteria; p__Firmicutes; c__Bacilli; o__Turicibacterales; f__Turicibacteraceae; g__Turicibacter; s__Unclassified_Turicibacter
otu3417	0.0	6.0	0.0	0.0	0.0	0.0	0.0	0.0	k__Bacteria; p__Bacteroidetes; c__Bacteroidia; o__Bacteroidales; f__Rikenellaceae; g__Unclassified_Rikenellaceae; s__Unclassified_Rikenellaceae
otu3420	0.0	6.0	0.0	0.0	0.0	0.0	0.0	0.0	k__Bacteria; p__Firmicutes; c__Clostridia; o__Clostridiales; f__Peptococcaceae; g__Peptococcus; s__Unclassified_Peptococcus
otu3431	6.0	0.0	0.0	0.0	0.0	0.0	0.0	0.0	k__Bacteria; p__Firmicutes; c__Clostridia; o__Clostridiales; f__Unclassified_Clostridiales; g__Unclassified_Clostridiales; s__Unclassified_Clostridiales
otu3476	0.0	6.0	0.0	0.0	0.0	0.0	0.0	0.0	k__Bacteria; p__Firmicutes; c__Clostridia; o__Clostridiales; f__Ruminococcaceae; g__Unclassified_Ruminococcaceae; s__Unclassified_Ruminococcaceae
otu3509	0.0	6.0	0.0	0.0	0.0	0.0	0.0	0.0	k__Bacteria; p__Firmicutes; c__Clostridia; o__Clostridiales; f__Ruminococcaceae; g__Unclassified_Ruminococcaceae; s__Unclassified_Ruminococcaceae
otu3553	0.0	6.0	0.0	0.0	0.0	0.0	0.0	0.0	k__Bacteria; p__Firmicutes; c__Bacilli; o__Lactobacillales; f__Lactobacillaceae; g__Lactobacillus; s__Unclassified_Lactobacillus
otu3563	0.0	6.0	0.0	0.0	0.0	0.0	0.0	0.0	k__Bacteria; p__Firmicutes; c__Clostridia; o__Clostridiales; f__Ruminococcaceae; g__Unclassified_Ruminococcaceae; s__Unclassified_Ruminococcaceae
otu3594	0.0	0.0	0.0	0.0	1.0	0.0	5.0	0.0	k__Bacteria; p__Firmicutes; c__Clostridia; o__Clostridiales; f__Peptostreptococcaceae; g__[Clostridium]; s__[Clostridium]_difficile
otu3614	0.0	6.0	0.0	0.0	0.0	0.0	0.0	0.0	k__Bacteria; p__Bacteroidetes; c__Sphingobacteriia; o__Sphingobacteriales; f__Sphingobacteriaceae; g__Unclassified_Sphingobacteriaceae; s__Unclassified_Sphingobacteriaceae
otu3681	0.0	6.0	0.0	0.0	0.0	0.0	0.0	0.0	k__Bacteria; p__Firmicutes; c__Clostridia; o__Clostridiales; f__Unclassified_Clostridiales; g__Unclassified_Clostridiales; s__Unclassified_Clostridiales
otu3685	6.0	0.0	0.0	0.0	0.0	0.0	0.0	0.0	k__Bacteria; p__Actinobacteria; c__Thermoleophilia; o__Solirubrobacterales; f__Unclassified_Solirubrobacterales; g__Unclassified_Solirubrobacterales; s__Unclassified_Solirubrobacterales
otu3703	0.0	0.0	0.0	0.0	5.0	1.0	0.0	0.0	k__Bacteria; p__Bacteroidetes; c__Bacteroidia; o__Bacteroidales; f__Bacteroidaceae; g__Bacteroides; s__Unclassified_Bacteroides
otu3719	0.0	0.0	0.0	0.0	0.0	6.0	0.0	0.0	k__Bacteria; p__Firmicutes; c__Clostridia; o__Clostridiales; f__Lachnospiraceae; g__Unclassified_Lachnospiraceae; s__Unclassified_Lachnospiraceae
otu3790	0.0	6.0	0.0	0.0	0.0	0.0	0.0	0.0	k__Bacteria; p__Firmicutes; c__Clostridia; o__Clostridiales; f__Unclassified_Clostridiales; g__Unclassified_Clostridiales; s__Unclassified_Clostridiales
otu3865	0.0	0.0	0.0	0.0	0.0	6.0	0.0	0.0	k__Bacteria; p__Firmicutes; c__Clostridia; o__Clostridiales; f__Ruminococcaceae; g__Unclassified_Ruminococcaceae; s__Unclassified_Ruminococcaceae
otu3921	0.0	0.0	0.0	6.0	0.0	0.0	0.0	0.0	k__Bacteria; p__Firmicutes; c__Clostridia; o__Clostridiales; f__Unclassified_Clostridiales; g__Unclassified_Clostridiales; s__Unclassified_Clostridiales
otu3934	5.0	1.0	0.0	0.0	0.0	0.0	0.0	0.0	k__Bacteria; p__Proteobacteria; c__Alphaproteobacteria; o__Sphingomonadales; f__Sphingomonadaceae; g__Sphingomonas; s__Sphingomonas_yabuuchiae
otu3938	0.0	0.0	0.0	6.0	0.0	0.0	0.0	0.0	k__Bacteria; p__Firmicutes; c__Clostridia; o__Clostridiales; f__Lachnospiraceae; g__[Ruminococcus]; s__[Ruminococcus]_gnavus
otu3996	0.0	6.0	0.0	0.0	0.0	0.0	0.0	0.0	k__Bacteria; p__Firmicutes; c__Erysipelotrichi; o__Erysipelotrichales; f__Erysipelotrichaceae; g__Allobaculum; s__Unclassified_Allobaculum
otu4082	5.0	1.0	0.0	0.0	0.0	0.0	0.0	0.0	k__Bacteria; p__Firmicutes; c__Clostridia; o__Clostridiales; f__Unclassified_Clostridiales; g__Unclassified_Clostridiales; s__Unclassified_Clostridiales
otu4083	0.0	6.0	0.0	0.0	0.0	0.0	0.0	0.0	k__Bacteria; p__Firmicutes; c__Clostridia; o__Clostridiales; f__[Mogibacteriaceae]; g__Unclassified_[Mogibacteriaceae]; s__Unclassified_[Mogibacteriaceae]
otu4129	1.0	5.0	0.0	0.0	0.0	0.0	0.0	0.0	k__Bacteria; p__Actinobacteria; c__Actinobacteria; o__Bifidobacteriales; f__Bifidobacteriaceae; g__Bifidobacterium; s__Unclassified_Bifidobacterium
otu4144	0.0	6.0	0.0	0.0	0.0	0.0	0.0	0.0	k__Bacteria; p__Firmicutes; c__Clostridia; o__Clostridiales; f__Ruminococcaceae; g__Unclassified_Ruminococcaceae; s__Unclassified_Ruminococcaceae
otu4153	6.0	0.0	0.0	0.0	0.0	0.0	0.0	0.0	k__Bacteria; p__Actinobacteria; c__Rubrobacteria; o__Rubrobacterales; f__Rubrobacteraceae; g__Rubrobacter; s__Unclassified_Rubrobacter
otu4175	0.0	0.0	0.0	0.0	0.0	0.0	6.0	0.0	k__Bacteria; p__Proteobacteria; c__Gammaproteobacteria; o__Enterobacteriales; f__Enterobacteriaceae; g__Unclassified_Enterobacteriaceae; s__Unclassified_Enterobacteriaceae
otu4208	0.0	0.0	0.0	0.0	0.0	0.0	0.0	6.0	k__Bacteria; p__Proteobacteria; c__Betaproteobacteria; o__Burkholderiales; f__Unclassified_Burkholderiales; g__Unclassified_Burkholderiales; s__Unclassified_Burkholderiales
otu4230	6.0	0.0	0.0	0.0	0.0	0.0	0.0	0.0	k__Bacteria; p__Firmicutes; c__Clostridia; o__Clostridiales; f__Lachnospiraceae; g__Dorea; s__Unclassified_Dorea
otu4262	0.0	6.0	0.0	0.0	0.0	0.0	0.0	0.0	k__Bacteria; p__Firmicutes; c__Clostridia; o__Clostridiales; f__Ruminococcaceae; g__Ruminococcus; s__Unclassified_Ruminococcus
otu4274	0.0	6.0	0.0	0.0	0.0	0.0	0.0	0.0	k__Bacteria; p__Proteobacteria; c__Alphaproteobacteria; o__Caulobacterales; f__Caulobacteraceae; g__Brevundimonas; s__Brevundimonas_poindexterae
otu4310	0.0	6.0	0.0	0.0	0.0	0.0	0.0	0.0	k__Bacteria; p__Firmicutes; c__Clostridia; o__Clostridiales; f__Ruminococcaceae; g__Unclassified_Ruminococcaceae; s__Unclassified_Ruminococcaceae
otu4331	0.0	0.0	0.0	0.0	0.0	6.0	0.0	0.0	k__Bacteria; p__Firmicutes; c__Clostridia; o__Clostridiales; f__Lachnospiraceae; g__Unclassified_Lachnospiraceae; s__Unclassified_Lachnospiraceae
otu4365	3.0	3.0	0.0	0.0	0.0	0.0	0.0	0.0	k__Bacteria; p__Proteobacteria; c__Alphaproteobacteria; o__Caulobacterales; f__Caulobacteraceae; g__Unclassified_Caulobacteraceae; s__Unclassified_Caulobacteraceae
otu4457	2.0	4.0	0.0	0.0	0.0	0.0	0.0	0.0	k__Bacteria; p__Actinobacteria; c__Actinobacteria; o__Actinomycetales; f__Promicromonosporaceae; g__Cellulosimicrobium; s__Unclassified_Cellulosimicrobium
otu4463	0.0	6.0	0.0	0.0	0.0	0.0	0.0	0.0	k__Bacteria; p__Firmicutes; c__Clostridia; o__Clostridiales; f__Unclassified_Clostridiales; g__Unclassified_Clostridiales; s__Unclassified_Clostridiales
otu4477	0.0	6.0	0.0	0.0	0.0	0.0	0.0	0.0	k__Bacteria; p__Firmicutes; c__Clostridia; o__Clostridiales; f__Ruminococcaceae; g__Oscillospira; s__Unclassified_Oscillospira
otu4626	0.0	0.0	5.0	0.0	0.0	1.0	0.0	0.0	k__Bacteria; p__Actinobacteria; c__Actinobacteria; o__Bifidobacteriales; f__Bifidobacteriaceae; g__Bifidobacterium; s__Bifidobacterium_longum
otu4629	0.0	6.0	0.0	0.0	0.0	0.0	0.0	0.0	k__Bacteria; p__Proteobacteria; c__Alphaproteobacteria; o__Rhodospirillales; f__Acetobacteraceae; g__Roseomonas; s__Roseomonas_rosea
otu4720	5.0	1.0	0.0	0.0	0.0	0.0	0.0	0.0	k__Bacteria; p__Cyanobacteria; c__Chloroplast; o__Streptophyta; f__Unclassified_Streptophyta; g__Unclassified_Streptophyta; s__Unclassified_Streptophyta
otu4753	0.0	4.0	2.0	0.0	0.0	0.0	0.0	0.0	k__Bacteria; p__Gemmatimonadetes; c__Gemm-1; o__Unclassified_Gemm-1; f__Unclassified_Gemm-1; g__Unclassified_Gemm-1; s__Unclassified_Gemm-1
otu4757	6.0	0.0	0.0	0.0	0.0	0.0	0.0	0.0	k__Bacteria; p__[Thermi]; c__Deinococci; o__Deinococcales; f__Deinococcaceae; g__Deinococcus; s__Unclassified_Deinococcus
otu4761	0.0	0.0	0.0	0.0	0.0	0.0	0.0	6.0	k__Bacteria; p__Bacteroidetes; c__Bacteroidia; o__Bacteroidales; f__Bacteroidaceae; g__Bacteroides; s__Bacteroides_fragilis
otu4782	0.0	6.0	0.0	0.0	0.0	0.0	0.0	0.0	k__Bacteria; p__Proteobacteria; c__Gammaproteobacteria; o__Pseudomonadales; f__Pseudomonadaceae; g__Unclassified_Pseudomonadaceae; s__Unclassified_Pseudomonadaceae
otu4796	0.0	6.0	0.0	0.0	0.0	0.0	0.0	0.0	k__Bacteria; p__Bacteroidetes; c__Bacteroidia; o__Bacteroidales; f__S24-7; g__Unclassified_S24-7; s__Unclassified_S24-7
otu4802	6.0	0.0	0.0	0.0	0.0	0.0	0.0	0.0	k__Bacteria; p__Chloroflexi; c__Anaerolineae; o__GCA004; f__Unclassified_GCA004; g__Unclassified_GCA004; s__Unclassified_GCA004
otu4835	0.0	0.0	0.0	4.0	0.0	0.0	0.0	2.0	k__Bacteria; p__Firmicutes; c__Clostridia; o__Clostridiales; f__Lachnospiraceae; g__[Ruminococcus]; s__[Ruminococcus]_gnavus
otu4846	0.0	0.0	0.0	6.0	0.0	0.0	0.0	0.0	k__Bacteria; p__Bacteroidetes; c__Bacteroidia; o__Bacteroidales; f__Bacteroidaceae; g__Bacteroides; s__Unclassified_Bacteroides
otu4940	0.0	0.0	0.0	0.0	0.0	0.0	6.0	0.0	k__Bacteria; p__Bacteroidetes; c__Bacteroidia; o__Bacteroidales; f__Bacteroidaceae; g__Bacteroides; s__Bacteroides_plebeius
otu4946	0.0	0.0	0.0	6.0	0.0	0.0	0.0	0.0	k__Bacteria; p__Firmicutes; c__Clostridia; o__Clostridiales; f__Lachnospiraceae; g__Unclassified_Lachnospiraceae; s__Unclassified_Lachnospiraceae
otu4983	0.0	0.0	0.0	0.0	5.0	0.0	1.0	0.0	k__Bacteria; p__Firmicutes; c__Clostridia; o__Clostridiales; f__Peptostreptococcaceae; g__[Clostridium]; s__[Clostridium]_difficile
otu4990	0.0	6.0	0.0	0.0	0.0	0.0	0.0	0.0	k__Bacteria; p__Acidobacteria; c__Solibacteres; o__Solibacterales; f__Unclassified_Solibacterales; g__Unclassified_Solibacterales; s__Unclassified_Solibacterales
otu5033	0.0	0.0	0.0	5.0	0.0	0.0	1.0	0.0	k__Bacteria; p__Bacteroidetes; c__Bacteroidia; o__Bacteroidales; f__Bacteroidaceae; g__Bacteroides; s__Unclassified_Bacteroides
otu5088	0.0	0.0	5.0	1.0	0.0	0.0	0.0	0.0	k__Bacteria; p__Actinobacteria; c__Actinobacteria; o__Bifidobacteriales; f__Bifidobacteriaceae; g__Bifidobacterium; s__Bifidobacterium_longum
otu5210	0.0	0.0	0.0	0.0	0.0	6.0	0.0	0.0	k__Bacteria; p__Firmicutes; c__Clostridia; o__Clostridiales; f__Ruminococcaceae; g__Unclassified_Ruminococcaceae; s__Unclassified_Ruminococcaceae
otu5282	0.0	6.0	0.0	0.0	0.0	0.0	0.0	0.0	k__Bacteria; p__Firmicutes; c__Clostridia; o__Clostridiales; f__Unclassified_Clostridiales; g__Unclassified_Clostridiales; s__Unclassified_Clostridiales
otu5290	0.0	0.0	0.0	0.0	0.0	1.0	5.0	0.0	k__Bacteria; p__Proteobacteria; c__Gammaproteobacteria; o__Enterobacteriales; f__Enterobacteriaceae; g__Unclassified_Enterobacteriaceae; s__Unclassified_Enterobacteriaceae
otu5365	3.0	2.0	1.0	0.0	0.0	0.0	0.0	0.0	k__Bacteria; p__Acidobacteria; c__[Chloracidobacteria]; o__RB41; f__Unclassified_RB41; g__Unclassified_RB41; s__Unclassified_RB41
otu5373	6.0	0.0	0.0	0.0	0.0	0.0	0.0	0.0	k__Bacteria; p__Bacteroidetes; c__Sphingobacteriia; o__Sphingobacteriales; f__Sphingobacteriaceae; g__Unclassified_Sphingobacteriaceae; s__Unclassified_Sphingobacteriaceae
otu5394	0.0	0.0	0.0	0.0	4.0	0.0	2.0	0.0	k__Bacteria; p__Firmicutes; c__Clostridia; o__Clostridiales; f__Lachnospiraceae; g__Unclassified_Lachnospiraceae; s__Unclassified_Lachnospiraceae
otu5400	0.0	0.0	0.0	0.0	0.0	6.0	0.0	0.0	k__Bacteria; p__Firmicutes; c__Clostridia; o__Clostridiales; f__Lachnospiraceae; g__Unclassified_Lachnospiraceae; s__Unclassified_Lachnospiraceae
otu5406	0.0	0.0	0.0	0.0	0.0	3.0	2.0	1.0	k__Bacteria; p__Firmicutes; c__Clostridia; o__Clostridiales; f__Lachnospiraceae; g__Unclassified_Lachnospiraceae; s__Unclassified_Lachnospiraceae
otu5489	0.0	6.0	0.0	0.0	0.0	0.0	0.0	0.0	k__Bacteria; p__Acidobacteria; c__Solibacteres; o__Solibacterales; f__Solibacteraceae; g__Candidatus_Solibacter; s__Unclassified_Candidatus_Solibacter
otu5503	0.0	0.0	0.0	0.0	0.0	6.0	0.0	0.0	k__Bacteria; p__Firmicutes; c__Clostridia; o__Clostridiales; f__Ruminococcaceae; g__Unclassified_Ruminococcaceae; s__Unclassified_Ruminococcaceae
otu5521	0.0	0.0	0.0	0.0	0.0	1.0	5.0	0.0	k__Bacteria; p__Proteobacteria; c__Gammaproteobacteria; o__Enterobacteriales; f__Enterobacteriaceae; g__Unclassified_Enterobacteriaceae; s__Unclassified_Enterobacteriaceae
otu5603	4.0	0.0	0.0	0.0	0.0	0.0	2.0	0.0	k__Bacteria; p__Firmicutes; c__Clostridia; o__Clostridiales; f__Clostridiaceae; g__Clostridium; s__Unclassified_Clostridium
otu5627	1.0	3.0	2.0	0.0	0.0	0.0	0.0	0.0	k__Bacteria; p__Actinobacteria; c__Acidimicrobiia; o__Acidimicrobiales; f__C111; g__Unclassified_C111; s__Unclassified_C111
otu5729	0.0	5.0	0.0	1.0	0.0	0.0	0.0	0.0	k__Bacteria; p__Firmicutes; c__Clostridia; o__Clostridiales; f__Ruminococcaceae; g__Unclassified_Ruminococcaceae; s__Unclassified_Ruminococcaceae
otu5783	0.0	0.0	0.0	2.0	0.0	0.0	2.0	2.0	k__Bacteria; p__Firmicutes; c__Clostridia; o__Clostridiales; f__Ruminococcaceae; g__Unclassified_Ruminococcaceae; s__Unclassified_Ruminococcaceae
otu5967	0.0	5.0	0.0	0.0	0.0	0.0	1.0	0.0	k__Bacteria; p__TM7; c__TM7-3; o__I025; f__Rs-045; g__Unclassified_Rs-045; s__Unclassified_Rs-045
otu5997	0.0	0.0	0.0	0.0	0.0	6.0	0.0	0.0	k__Bacteria; p__Firmicutes; c__Clostridia; o__Clostridiales; f__Lachnospiraceae; g__Unclassified_Lachnospiraceae; s__Unclassified_Lachnospiraceae
otu6016	0.0	6.0	0.0	0.0	0.0	0.0	0.0	0.0	k__Bacteria; p__Firmicutes; c__Clostridia; o__Clostridiales; f__Unclassified_Clostridiales; g__Unclassified_Clostridiales; s__Unclassified_Clostridiales
otu6029	6.0	0.0	0.0	0.0	0.0	0.0	0.0	0.0	k__Bacteria; p__Tenericutes; c__Mollicutes; o__Acholeplasmatales; f__Acholeplasmataceae; g__Acholeplasma; s__Unclassified_Acholeplasma
otu6031	6.0	0.0	0.0	0.0	0.0	0.0	0.0	0.0	k__Bacteria; p__Firmicutes; c__Clostridia; o__Clostridiales; f__Unclassified_Clostridiales; g__Unclassified_Clostridiales; s__Unclassified_Clostridiales
otu6040	0.0	6.0	0.0	0.0	0.0	0.0	0.0	0.0	k__Bacteria; p__Acidobacteria; c__Acidobacteriia; o__Acidobacteriales; f__Koribacteraceae; g__Unclassified_Koribacteraceae; s__Unclassified_Koribacteraceae
otu6096	6.0	0.0	0.0	0.0	0.0	0.0	0.0	0.0	k__Bacteria; p__Firmicutes; c__Clostridia; o__Clostridiales; f__Ruminococcaceae; g__Unclassified_Ruminococcaceae; s__Unclassified_Ruminococcaceae
otu6141	0.0	0.0	0.0	0.0	0.0	1.0	5.0	0.0	k__Bacteria; p__Firmicutes; c__Clostridia; o__Clostridiales; f__Lachnospiraceae; g__Oribacterium; s__Unclassified_Oribacterium
otu6232	0.0	0.0	0.0	0.0	6.0	0.0	0.0	0.0	k__Bacteria; p__Proteobacteria; c__Gammaproteobacteria; o__Enterobacteriales; f__Enterobacteriaceae; g__Unclassified_Enterobacteriaceae; s__Unclassified_Enterobacteriaceae
otu6252	5.0	0.0	0.0	0.0	0.0	1.0	0.0	0.0	k__Bacteria; p__Chloroflexi; c__Ellin6529; o__Unclassified_Ellin6529; f__Unclassified_Ellin6529; g__Unclassified_Ellin6529; s__Unclassified_Ellin6529
otu6255	0.0	1.0	0.0	2.0	0.0	0.0	3.0	0.0	k__Bacteria; p__Firmicutes; c__Erysipelotrichi; o__Erysipelotrichales; f__Erysipelotrichaceae; g__Unclassified_Erysipelotrichaceae; s__Unclassified_Erysipelotrichaceae
otu6271	0.0	6.0	0.0	0.0	0.0	0.0	0.0	0.0	k__Bacteria; p__Synergistetes; c__Synergistia; o__Synergistales; f__Dethiosulfovibrionaceae; g__Pyramidobacter; s__Pyramidobacter_piscolens
otu6283	0.0	0.0	0.0	0.0	0.0	6.0	0.0	0.0	k__Bacteria; p__Firmicutes; c__Clostridia; o__Clostridiales; f__Unclassified_Clostridiales; g__Unclassified_Clostridiales; s__Unclassified_Clostridiales
otu6288	0.0	0.0	0.0	6.0	0.0	0.0	0.0	0.0	k__Bacteria; p__Firmicutes; c__Clostridia; o__Clostridiales; f__Lachnospiraceae; g__Unclassified_Lachnospiraceae; s__Unclassified_Lachnospiraceae
otu6315	0.0	0.0	0.0	5.0	0.0	1.0	0.0	0.0	k__Bacteria; p__Firmicutes; c__Clostridia; o__Clostridiales; f__Unclassified_Clostridiales; g__Unclassified_Clostridiales; s__Unclassified_Clostridiales
otu6355	0.0	6.0	0.0	0.0	0.0	0.0	0.0	0.0	k__Bacteria; p__Firmicutes; c__Clostridia; o__Clostridiales; f__Peptococcaceae; g__rc4-4; s__Unclassified_rc4-4
otu6433	0.0	4.0	0.0	1.0	0.0	0.0	1.0	0.0	k__Bacteria; p__Firmicutes; c__Clostridia; o__Clostridiales; f__Lachnospiraceae; g__Dorea; s__Unclassified_Dorea
otu6447	0.0	6.0	0.0	0.0	0.0	0.0	0.0	0.0	k__Bacteria; p__Bacteroidetes; c__Sphingobacteriia; o__Sphingobacteriales; f__Sphingobacteriaceae; g__Unclassified_Sphingobacteriaceae; s__Unclassified_Sphingobacteriaceae
otu6475	0.0	1.0	0.0	2.0	0.0	0.0	1.0	2.0	k__Bacteria; p__Bacteroidetes; c__Bacteroidia; o__Bacteroidales; f__Bacteroidaceae; g__Bacteroides; s__Unclassified_Bacteroides
otu6529	3.0	3.0	0.0	0.0	0.0	0.0	0.0	0.0	k__Bacteria; p__Firmicutes; c__Clostridia; o__Clostridiales; f__Lachnospiraceae; g__Dorea; s__Unclassified_Dorea
otu6681	0.0	6.0	0.0	0.0	0.0	0.0	0.0	0.0	k__Bacteria; p__Firmicutes; c__Bacilli; o__Lactobacillales; f__Lactobacillaceae; g__Lactobacillus; s__Unclassified_Lactobacillus
otu6685	0.0	6.0	0.0	0.0	0.0	0.0	0.0	0.0	k__Bacteria; p__Actinobacteria; c__Coriobacteriia; o__Coriobacteriales; f__Coriobacteriaceae; g__Unclassified_Coriobacteriaceae; s__Unclassified_Coriobacteriaceae
otu6692	0.0	0.0	0.0	0.0	0.0	0.0	6.0	0.0	k__Bacteria; p__Actinobacteria; c__Actinobacteria; o__Bifidobacteriales; f__Bifidobacteriaceae; g__Scardovia; s__Unclassified_Scardovia
otu6711	0.0	0.0	0.0	0.0	0.0	0.0	0.0	6.0	k__Bacteria; p__Firmicutes; c__Bacilli; o__Lactobacillales; f__Unclassified_Lactobacillales; g__Unclassified_Lactobacillales; s__Unclassified_Lactobacillales
otu6760	6.0	0.0	0.0	0.0	0.0	0.0	0.0	0.0	k__Bacteria; p__Proteobacteria; c__Alphaproteobacteria; o__Rickettsiales; f__Pelagibacteraceae; g__Unclassified_Pelagibacteraceae; s__Unclassified_Pelagibacteraceae
otu6796	0.0	0.0	0.0	0.0	6.0	0.0	0.0	0.0	k__Bacteria; p__Firmicutes; c__Clostridia; o__Clostridiales; f__Ruminococcaceae; g__Faecalibacterium; s__Faecalibacterium_prausnitzii
otu6808	0.0	6.0	0.0	0.0	0.0	0.0	0.0	0.0	k__Bacteria; p__Firmicutes; c__Clostridia; o__Clostridiales; f__Lachnospiraceae; g__Unclassified_Lachnospiraceae; s__Unclassified_Lachnospiraceae
otu6829	0.0	6.0	0.0	0.0	0.0	0.0	0.0	0.0	k__Bacteria; p__Bacteroidetes; c__Bacteroidia; o__Bacteroidales; f__Bacteroidaceae; g__Bacteroides; s__Unclassified_Bacteroides
otu6898	0.0	6.0	0.0	0.0	0.0	0.0	0.0	0.0	k__Bacteria; p__Firmicutes; c__Bacilli; o__Lactobacillales; f__Lactobacillaceae; g__Lactobacillus; s__Unclassified_Lactobacillus
otu6908	0.0	0.0	0.0	4.0	0.0	0.0	2.0	0.0	k__Bacteria; p__Firmicutes; c__Clostridia; o__Clostridiales; f__Lachnospiraceae; g__Unclassified_Lachnospiraceae; s__Unclassified_Lachnospiraceae
otu6929	0.0	0.0	0.0	0.0	4.0	1.0	0.0	1.0	k__Bacteria; p__Firmicutes; c__Erysipelotrichi; o__Erysipelotrichales; f__Erysipelotrichaceae; g__Unclassified_Erysipelotrichaceae; s__Unclassified_Erysipelotrichaceae
otu6939	0.0	0.0	0.0	6.0	0.0	0.0	0.0	0.0	k__Bacteria; p__Bacteroidetes; c__Bacteroidia; o__Bacteroidales; f__Bacteroidaceae; g__Bacteroides; s__Unclassified_Bacteroides
otu7006	0.0	6.0	0.0	0.0	0.0	0.0	0.0	0.0	k__Bacteria; p__Actinobacteria; c__Actinobacteria; o__Actinomycetales; f__Unclassified_Actinomycetales; g__Unclassified_Actinomycetales; s__Unclassified_Actinomycetales
otu7030	6.0	0.0	0.0	0.0	0.0	0.0	0.0	0.0	k__Bacteria; p__Bacteroidetes; c__Bacteroidia; o__Bacteroidales; f__S24-7; g__Unclassified_S24-7; s__Unclassified_S24-7
otu7117	0.0	6.0	0.0	0.0	0.0	0.0	0.0	0.0	k__Bacteria; p__Bacteroidetes; c__Bacteroidia; o__Bacteroidales; f__Prevotellaceae; g__Prevotella; s__Unclassified_Prevotella
otu7145	6.0	0.0	0.0	0.0	0.0	0.0	0.0	0.0	k__Bacteria; p__Proteobacteria; c__Gammaproteobacteria; o__Pseudomonadales; f__Pseudomonadaceae; g__Pseudomonas; s__Unclassified_Pseudomonas
otu7148	0.0	0.0	0.0	6.0	0.0	0.0	0.0	0.0	k__Bacteria; p__Firmicutes; c__Clostridia; o__Clostridiales; f__Veillonellaceae; g__Megamonas; s__Unclassified_Megamonas
otu7228	0.0	6.0	0.0	0.0	0.0	0.0	0.0	0.0	k__Bacteria; p__Firmicutes; c__Clostridia; o__Clostridiales; f__Ruminococcaceae; g__Unclassified_Ruminococcaceae; s__Unclassified_Ruminococcaceae
otu7259	3.0	3.0	0.0	0.0	0.0	0.0	0.0	0.0	k__Bacteria; p__Proteobacteria; c__Deltaproteobacteria; o__MIZ46; f__Unclassified_MIZ46; g__Unclassified_MIZ46; s__Unclassified_MIZ46
otu7295	0.0	6.0	0.0	0.0	0.0	0.0	0.0	0.0	k__Bacteria; p__Bacteroidetes; c__Bacteroidia; o__Bacteroidales; f__[Barnesiellaceae]; g__Unclassified_[Barnesiellaceae]; s__Unclassified_[Barnesiellaceae]
otu7307	0.0	6.0	0.0	0.0	0.0	0.0	0.0	0.0	k__Bacteria; p__Firmicutes; c__Bacilli; o__Lactobacillales; f__Lactobacillaceae; g__Lactobacillus; s__Unclassified_Lactobacillus
otu7392	6.0	0.0	0.0	0.0	0.0	0.0	0.0	0.0	k__Bacteria; p__Firmicutes; c__Bacilli; o__Lactobacillales; f__Streptococcaceae; g__Streptococcus; s__Unclassified_Streptococcus
otu7406	0.0	6.0	0.0	0.0	0.0	0.0	0.0	0.0	k__Bacteria; p__Bacteroidetes; c__[Saprospirae]; o__[Saprospirales]; f__Chitinophagaceae; g__Unclassified_Chitinophagaceae; s__Unclassified_Chitinophagaceae
otu7510	0.0	6.0	0.0	0.0	0.0	0.0	0.0	0.0	k__Bacteria; p__Firmicutes; c__Clostridia; o__Clostridiales; f__Unclassified_Clostridiales; g__Unclassified_Clostridiales; s__Unclassified_Clostridiales
otu7555	0.0	0.0	0.0	0.0	0.0	0.0	6.0	0.0	k__Bacteria; p__Proteobacteria; c__Gammaproteobacteria; o__Enterobacteriales; f__Enterobacteriaceae; g__Unclassified_Enterobacteriaceae; s__Unclassified_Enterobacteriaceae
otu7648	0.0	6.0	0.0	0.0	0.0	0.0	0.0	0.0	k__Bacteria; p__Gemmatimonadetes; c__Gemm-1; o__Unclassified_Gemm-1; f__Unclassified_Gemm-1; g__Unclassified_Gemm-1; s__Unclassified_Gemm-1
otu7728	0.0	6.0	0.0	0.0	0.0	0.0	0.0	0.0	k__Bacteria; p__Firmicutes; c__Clostridia; o__Clostridiales; f__Ruminococcaceae; g__Ruminococcus; s__Unclassified_Ruminococcus
otu51	5.0	0.0	0.0	0.0	0.0	0.0	0.0	0.0	k__Bacteria; p__Firmicutes; c__Clostridia; o__Clostridiales; f__Ruminococcaceae; g__Unclassified_Ruminococcaceae; s__Unclassified_Ruminococcaceae
otu61	0.0	5.0	0.0	0.0	0.0	0.0	0.0	0.0	k__Bacteria; p__Firmicutes; c__Bacilli; o__Lactobacillales; f__Lactobacillaceae; g__Lactobacillus; s__Unclassified_Lactobacillus
otu78	0.0	0.0	0.0	2.0	1.0	0.0	2.0	0.0	k__Bacteria; p__Firmicutes; c__Clostridia; o__Clostridiales; f__Ruminococcaceae; g__Oscillospira; s__Unclassified_Oscillospira
otu105	0.0	0.0	0.0	4.0	0.0	0.0	0.0	1.0	k__Bacteria; p__Firmicutes; c__Clostridia; o__Clostridiales; f__Lachnospiraceae; g__[Ruminococcus]; s__[Ruminococcus]_gnavus
otu148	0.0	5.0	0.0	0.0	0.0	0.0	0.0	0.0	k__Bacteria; p__Firmicutes; c__Clostridia; o__Clostridiales; f__Ruminococcaceae; g__Unclassified_Ruminococcaceae; s__Unclassified_Ruminococcaceae
otu180	0.0	4.0	0.0	0.0	0.0	1.0	0.0	0.0	k__Bacteria; p__Firmicutes; c__Clostridia; o__Clostridiales; f__Lachnospiraceae; g__Lachnospira; s__Unclassified_Lachnospira
otu203	0.0	0.0	0.0	4.0	0.0	0.0	1.0	0.0	k__Bacteria; p__Firmicutes; c__Clostridia; o__Clostridiales; f__Lachnospiraceae; g__[Ruminococcus]; s__Unclassified_[Ruminococcus]
otu240	0.0	5.0	0.0	0.0	0.0	0.0	0.0	0.0	k__Bacteria; p__Bacteroidetes; c__Bacteroidia; o__Bacteroidales; f__Prevotellaceae; g__Unclassified_Prevotellaceae; s__Unclassified_Prevotellaceae
otu297	0.0	5.0	0.0	0.0	0.0	0.0	0.0	0.0	k__Bacteria; p__Proteobacteria; c__Alphaproteobacteria; o__Rhodospirillales; f__Acetobacteraceae; g__Unclassified_Acetobacteraceae; s__Unclassified_Acetobacteraceae
otu329	0.0	0.0	0.0	0.0	0.0	1.0	4.0	0.0	k__Bacteria; p__Proteobacteria; c__Gammaproteobacteria; o__Enterobacteriales; f__Enterobacteriaceae; g__Unclassified_Enterobacteriaceae; s__Unclassified_Enterobacteriaceae
otu383	0.0	0.0	0.0	1.0	4.0	0.0	0.0	0.0	k__Bacteria; p__Proteobacteria; c__Gammaproteobacteria; o__Enterobacteriales; f__Enterobacteriaceae; g__Unclassified_Enterobacteriaceae; s__Unclassified_Enterobacteriaceae
otu386	0.0	0.0	0.0	0.0	0.0	5.0	0.0	0.0	k__Bacteria; p__Firmicutes; c__Clostridia; o__Clostridiales; f__Ruminococcaceae; g__Unclassified_Ruminococcaceae; s__Unclassified_Ruminococcaceae
otu388	0.0	0.0	0.0	0.0	0.0	0.0	0.0	5.0	k__Bacteria; p__Firmicutes; c__Clostridia; o__Clostridiales; f__Lachnospiraceae; g__[Ruminococcus]; s__[Ruminococcus]_gnavus
otu447	0.0	0.0	0.0	1.0	0.0	1.0	1.0	2.0	k__Bacteria; p__Firmicutes; c__Clostridia; o__Clostridiales; f__Lachnospiraceae; g__[Ruminococcus]; s__[Ruminococcus]_gnavus
otu448	0.0	0.0	0.0	0.0	0.0	5.0	0.0	0.0	k__Bacteria; p__Firmicutes; c__Clostridia; o__Clostridiales; f__Unclassified_Clostridiales; g__Unclassified_Clostridiales; s__Unclassified_Clostridiales
otu521	0.0	5.0	0.0	0.0	0.0	0.0	0.0	0.0	k__Bacteria; p__Firmicutes; c__Clostridia; o__Clostridiales; f__Lachnospiraceae; g__Blautia; s__Unclassified_Blautia
otu539	0.0	5.0	0.0	0.0	0.0	0.0	0.0	0.0	k__Bacteria; p__Bacteroidetes; c__Sphingobacteriia; o__Sphingobacteriales; f__Sphingobacteriaceae; g__Unclassified_Sphingobacteriaceae; s__Unclassified_Sphingobacteriaceae
otu549	0.0	5.0	0.0	0.0	0.0	0.0	0.0	0.0	k__Bacteria; p__Bacteroidetes; c__Bacteroidia; o__Bacteroidales; f__Rikenellaceae; g__Unclassified_Rikenellaceae; s__Unclassified_Rikenellaceae
otu627	0.0	0.0	0.0	0.0	0.0	5.0	0.0	0.0	k__Bacteria; p__Firmicutes; c__Clostridia; o__Clostridiales; f__Unclassified_Clostridiales; g__Unclassified_Clostridiales; s__Unclassified_Clostridiales
otu677	0.0	5.0	0.0	0.0	0.0	0.0	0.0	0.0	k__Bacteria; p__Firmicutes; c__Clostridia; o__Clostridiales; f__Lachnospiraceae; g__Blautia; s__Unclassified_Blautia
otu724	0.0	0.0	0.0	0.0	0.0	5.0	0.0	0.0	k__Bacteria; p__Firmicutes; c__Clostridia; o__Clostridiales; f__Lachnospiraceae; g__Epulopiscium; s__Unclassified_Epulopiscium
otu733	0.0	5.0	0.0	0.0	0.0	0.0	0.0	0.0	k__Bacteria; p__Firmicutes; c__Clostridia; o__Clostridiales; f__Lachnospiraceae; g__Blautia; s__Unclassified_Blautia
otu759	0.0	1.0	3.0	1.0	0.0	0.0	0.0	0.0	k__Bacteria; p__Firmicutes; c__Bacilli; o__Lactobacillales; f__Streptococcaceae; g__Streptococcus; s__Unclassified_Streptococcus
otu797	2.0	3.0	0.0	0.0	0.0	0.0	0.0	0.0	k__Bacteria; p__Proteobacteria; c__Gammaproteobacteria; o__Pseudomonadales; f__Moraxellaceae; g__Acinetobacter; s__Acinetobacter_johnsonii
otu877	0.0	0.0	0.0	4.0	0.0	1.0	0.0	0.0	k__Bacteria; p__Firmicutes; c__Clostridia; o__Clostridiales; f__Unclassified_Clostridiales; g__Unclassified_Clostridiales; s__Unclassified_Clostridiales
otu911	0.0	5.0	0.0	0.0	0.0	0.0	0.0	0.0	k__Bacteria; p__Firmicutes; c__Clostridia; o__Clostridiales; f__Clostridiaceae; g__SMB53; s__Unclassified_SMB53
otu959	3.0	2.0	0.0	0.0	0.0	0.0	0.0	0.0	k__Bacteria; p__Bacteroidetes; c__Sphingobacteriia; o__Sphingobacteriales; f__Sphingobacteriaceae; g__Sphingobacterium; s__Unclassified_Sphingobacterium
otu960	0.0	0.0	0.0	0.0	0.0	1.0	2.0	2.0	k__Bacteria; p__Firmicutes; c__Clostridia; o__Clostridiales; f__Lachnospiraceae; g__[Ruminococcus]; s__[Ruminococcus]_gnavus
otu999	0.0	5.0	0.0	0.0	0.0	0.0	0.0	0.0	k__Bacteria; p__Firmicutes; c__Bacilli; o__Lactobacillales; f__Lactobacillaceae; g__Lactobacillus; s__Unclassified_Lactobacillus
otu1009	0.0	5.0	0.0	0.0	0.0	0.0	0.0	0.0	k__Bacteria; p__Firmicutes; c__Clostridia; o__Clostridiales; f__[Tissierellaceae]; g__Tepidimicrobium; s__Unclassified_Tepidimicrobium
otu1012	0.0	5.0	0.0	0.0	0.0	0.0	0.0	0.0	k__Bacteria; p__Firmicutes; c__Clostridia; o__Clostridiales; f__Lachnospiraceae; g__Unclassified_Lachnospiraceae; s__Unclassified_Lachnospiraceae
otu1038	5.0	0.0	0.0	0.0	0.0	0.0	0.0	0.0	k__Bacteria; p__Firmicutes; c__Clostridia; o__Clostridiales; f__Ruminococcaceae; g__Unclassified_Ruminococcaceae; s__Unclassified_Ruminococcaceae
otu1040	0.0	5.0	0.0	0.0	0.0	0.0	0.0	0.0	k__Bacteria; p__Firmicutes; c__Clostridia; o__Clostridiales; f__Ruminococcaceae; g__Unclassified_Ruminococcaceae; s__Unclassified_Ruminococcaceae
otu1046	0.0	0.0	0.0	5.0	0.0	0.0	0.0	0.0	k__Bacteria; p__Firmicutes; c__Clostridia; o__Clostridiales; f__Lachnospiraceae; g__Blautia; s__Unclassified_Blautia
otu1075	0.0	0.0	2.0	0.0	1.0	1.0	0.0	1.0	k__Bacteria; p__Firmicutes; c__Bacilli; o__Lactobacillales; f__Streptococcaceae; g__Streptococcus; s__Unclassified_Streptococcus
otu1079	2.0	3.0	0.0	0.0	0.0	0.0	0.0	0.0	k__Bacteria; p__Actinobacteria; c__Acidimicrobiia; o__Acidimicrobiales; f__Unclassified_Acidimicrobiales; g__Unclassified_Acidimicrobiales; s__Unclassified_Acidimicrobiales
otu1082	2.0	0.0	0.0	0.0	0.0	0.0	0.0	3.0	k__Bacteria; p__Bacteroidetes; c__Bacteroidia; o__Bacteroidales; f__Bacteroidaceae; g__Bacteroides; s__Bacteroides_fragilis
otu1109	0.0	0.0	0.0	5.0	0.0	0.0	0.0	0.0	k__Bacteria; p__Bacteroidetes; c__Bacteroidia; o__Bacteroidales; f__Bacteroidaceae; g__Bacteroides; s__Unclassified_Bacteroides
otu1137	0.0	3.0	2.0	0.0	0.0	0.0	0.0	0.0	k__Bacteria; p__Actinobacteria; c__Actinobacteria; o__Actinomycetales; f__Geodermatophilaceae; g__Unclassified_Geodermatophilaceae; s__Unclassified_Geodermatophilaceae
otu1164	0.0	5.0	0.0	0.0	0.0	0.0	0.0	0.0	k__Bacteria; p__Firmicutes; c__Clostridia; o__Clostridiales; f__Lachnospiraceae; g__[Ruminococcus]; s__[Ruminococcus]_gnavus
otu1186	0.0	5.0	0.0	0.0	0.0	0.0	0.0	0.0	k__Bacteria; p__Firmicutes; c__Clostridia; o__Clostridiales; f__Unclassified_Clostridiales; g__Unclassified_Clostridiales; s__Unclassified_Clostridiales
otu1193	0.0	5.0	0.0	0.0	0.0	0.0	0.0	0.0	k__Bacteria; p__Actinobacteria; c__Actinobacteria; o__Actinomycetales; f__Yaniellaceae; g__Yaniella; s__Unclassified_Yaniella
otu1210	0.0	0.0	0.0	0.0	0.0	5.0	0.0	0.0	k__Bacteria; p__Firmicutes; c__Clostridia; o__Clostridiales; f__Lachnospiraceae; g__Unclassified_Lachnospiraceae; s__Unclassified_Lachnospiraceae
otu1220	0.0	0.0	0.0	2.0	0.0	0.0	3.0	0.0	k__Bacteria; p__Bacteroidetes; c__Bacteroidia; o__Bacteroidales; f__Bacteroidaceae; g__Bacteroides; s__Unclassified_Bacteroides
otu1239	0.0	5.0	0.0	0.0	0.0	0.0	0.0	0.0	k__Bacteria; p__Bacteroidetes; c__Bacteroidia; o__Bacteroidales; f__Unclassified_Bacteroidales; g__Unclassified_Bacteroidales; s__Unclassified_Bacteroidales
otu1247	0.0	5.0	0.0	0.0	0.0	0.0	0.0	0.0	k__Bacteria; p__Firmicutes; c__Clostridia; o__Clostridiales; f__Ruminococcaceae; g__Unclassified_Ruminococcaceae; s__Unclassified_Ruminococcaceae
otu1267	0.0	5.0	0.0	0.0	0.0	0.0	0.0	0.0	k__Bacteria; p__Firmicutes; c__Clostridia; o__Clostridiales; f__Unclassified_Clostridiales; g__Unclassified_Clostridiales; s__Unclassified_Clostridiales
otu1294	2.0	0.0	3.0	0.0	0.0	0.0	0.0	0.0	k__Bacteria; p__Proteobacteria; c__Alphaproteobacteria; o__Sphingomonadales; f__Sphingomonadaceae; g__Novosphingobium; s__Novosphingobium_stygium
otu1343	0.0	0.0	0.0	0.0	0.0	5.0	0.0	0.0	k__Bacteria; p__Proteobacteria; c__Gammaproteobacteria; o__Pseudomonadales; f__Moraxellaceae; g__Enhydrobacter; s__Unclassified_Enhydrobacter
otu1368	0.0	0.0	0.0	0.0	0.0	5.0	0.0	0.0	k__Bacteria; p__Firmicutes; c__Clostridia; o__Clostridiales; f__Ruminococcaceae; g__Unclassified_Ruminococcaceae; s__Unclassified_Ruminococcaceae
otu1420	2.0	3.0	0.0	0.0	0.0	0.0	0.0	0.0	k__Bacteria; p__Proteobacteria; c__Alphaproteobacteria; o__Rhodospirillales; f__Rhodospirillaceae; g__Unclassified_Rhodospirillaceae; s__Unclassified_Rhodospirillaceae
otu1434	0.0	0.0	0.0	4.0	0.0	0.0	1.0	0.0	k__Bacteria; p__Bacteroidetes; c__Bacteroidia; o__Bacteroidales; f__Bacteroidaceae; g__Bacteroides; s__Unclassified_Bacteroides
otu1448	0.0	5.0	0.0	0.0	0.0	0.0	0.0	0.0	k__Bacteria; p__Firmicutes; c__Erysipelotrichi; o__Erysipelotrichales; f__Erysipelotrichaceae; g__Allobaculum; s__Unclassified_Allobaculum
otu1459	0.0	0.0	0.0	0.0	0.0	0.0	5.0	0.0	k__Bacteria; p__Proteobacteria; c__Gammaproteobacteria; o__Enterobacteriales; f__Enterobacteriaceae; g__Unclassified_Enterobacteriaceae; s__Unclassified_Enterobacteriaceae
otu1520	0.0	5.0	0.0	0.0	0.0	0.0	0.0	0.0	k__Bacteria; p__Firmicutes; c__Clostridia; o__Clostridiales; f__Unclassified_Clostridiales; g__Unclassified_Clostridiales; s__Unclassified_Clostridiales
otu1567	0.0	0.0	0.0	5.0	0.0	0.0	0.0	0.0	k__Bacteria; p__Firmicutes; c__Clostridia; o__Clostridiales; f__Ruminococcaceae; g__Unclassified_Ruminococcaceae; s__Unclassified_Ruminococcaceae
otu1626	0.0	0.0	0.0	0.0	0.0	0.0	5.0	0.0	k__Bacteria; p__Actinobacteria; c__Actinobacteria; o__Bifidobacteriales; f__Bifidobacteriaceae; g__Bifidobacterium; s__Unclassified_Bifidobacterium
otu1699	5.0	0.0	0.0	0.0	0.0	0.0	0.0	0.0	k__Bacteria; p__Proteobacteria; c__Betaproteobacteria; o__Methylophilales; f__Methylophilaceae; g__Methylotenera; s__Methylotenera_mobilis
otu1714	0.0	0.0	0.0	0.0	0.0	0.0	5.0	0.0	k__Bacteria; p__Proteobacteria; c__Gammaproteobacteria; o__Enterobacteriales; f__Enterobacteriaceae; g__Unclassified_Enterobacteriaceae; s__Unclassified_Enterobacteriaceae
otu1843	0.0	0.0	0.0	4.0	0.0	0.0	1.0	0.0	k__Bacteria; p__Bacteroidetes; c__Bacteroidia; o__Bacteroidales; f__Bacteroidaceae; g__Bacteroides; s__Unclassified_Bacteroides
otu1863	5.0	0.0	0.0	0.0	0.0	0.0	0.0	0.0	k__Bacteria; p__Acidobacteria; c__Acidobacteria-6; o__CCU21; f__Unclassified_CCU21; g__Unclassified_CCU21; s__Unclassified_CCU21
otu1892	0.0	0.0	3.0	2.0	0.0	0.0	0.0	0.0	k__Bacteria; p__Firmicutes; c__Clostridia; o__Clostridiales; f__Lachnospiraceae; g__Epulopiscium; s__Unclassified_Epulopiscium
otu1930	0.0	5.0	0.0	0.0	0.0	0.0	0.0	0.0	k__Bacteria; p__Bacteroidetes; c__Bacteroidia; o__Bacteroidales; f__S24-7; g__Unclassified_S24-7; s__Unclassified_S24-7
otu1942	0.0	0.0	0.0	0.0	0.0	0.0	5.0	0.0	k__Bacteria; p__Proteobacteria; c__Gammaproteobacteria; o__Enterobacteriales; f__Enterobacteriaceae; g__Unclassified_Enterobacteriaceae; s__Unclassified_Enterobacteriaceae
otu1980	0.0	0.0	0.0	3.0	2.0	0.0	0.0	0.0	k__Bacteria; p__Bacteroidetes; c__Bacteroidia; o__Bacteroidales; f__Bacteroidaceae; g__Bacteroides; s__Unclassified_Bacteroides
otu2004	0.0	5.0	0.0	0.0	0.0	0.0	0.0	0.0	k__Bacteria; p__Chloroflexi; c__Ktedonobacteria; o__Thermogemmatisporales; f__Thermogemmatisporaceae; g__Unclassified_Thermogemmatisporaceae; s__Unclassified_Thermogemmatisporaceae
otu2035	0.0	5.0	0.0	0.0	0.0	0.0	0.0	0.0	k__Bacteria; p__Firmicutes; c__Clostridia; o__Clostridiales; f__Lachnospiraceae; g__Unclassified_Lachnospiraceae; s__Unclassified_Lachnospiraceae
otu2042	0.0	5.0	0.0	0.0	0.0	0.0	0.0	0.0	k__Bacteria; p__Firmicutes; c__Bacilli; o__Lactobacillales; f__Aerococcaceae; g__Facklamia; s__Unclassified_Facklamia
otu2054	0.0	5.0	0.0	0.0	0.0	0.0	0.0	0.0	k__Bacteria; p__Firmicutes; c__Clostridia; o__Clostridiales; f__Unclassified_Clostridiales; g__Unclassified_Clostridiales; s__Unclassified_Clostridiales
otu2055	5.0	0.0	0.0	0.0	0.0	0.0	0.0	0.0	k__Bacteria; p__Firmicutes; c__Clostridia; o__Clostridiales; f__Ruminococcaceae; g__Unclassified_Ruminococcaceae; s__Unclassified_Ruminococcaceae
otu2057	0.0	0.0	0.0	0.0	0.0	5.0	0.0	0.0	k__Bacteria; p__Firmicutes; c__Clostridia; o__Clostridiales; f__Lachnospiraceae; g__Blautia; s__Unclassified_Blautia
otu2071	0.0	5.0	0.0	0.0	0.0	0.0	0.0	0.0	k__Bacteria; p__Proteobacteria; c__Gammaproteobacteria; o__Thiotrichales; f__Piscirickettsiaceae; g__Unclassified_Piscirickettsiaceae; s__Unclassified_Piscirickettsiaceae
otu2100	0.0	5.0	0.0	0.0	0.0	0.0	0.0	0.0	k__Bacteria; p__Proteobacteria; c__Gammaproteobacteria; o__Alteromonadales; f__[Chromatiaceae]; g__Unclassified_[Chromatiaceae]; s__Unclassified_[Chromatiaceae]
otu2153	5.0	0.0	0.0	0.0	0.0	0.0	0.0	0.0	k__Bacteria; p__Firmicutes; c__Clostridia; o__Clostridiales; f__Unclassified_Clostridiales; g__Unclassified_Clostridiales; s__Unclassified_Clostridiales
otu2158	0.0	0.0	0.0	5.0	0.0	0.0	0.0	0.0	k__Bacteria; p__Firmicutes; c__Clostridia; o__Clostridiales; f__Lachnospiraceae; g__Unclassified_Lachnospiraceae; s__Unclassified_Lachnospiraceae
otu2192	0.0	1.0	0.0	4.0	0.0	0.0	0.0	0.0	k__Bacteria; p__Firmicutes; c__Clostridia; o__Clostridiales; f__Lachnospiraceae; g__Unclassified_Lachnospiraceae; s__Unclassified_Lachnospiraceae
otu2298	1.0	0.0	0.0	0.0	0.0	1.0	0.0	3.0	k__Bacteria; p__Bacteroidetes; c__Bacteroidia; o__Bacteroidales; f__Bacteroidaceae; g__Bacteroides; s__Unclassified_Bacteroides
otu2316	0.0	0.0	0.0	5.0	0.0	0.0	0.0	0.0	k__Bacteria; p__Firmicutes; c__Clostridia; o__Clostridiales; f__Lachnospiraceae; g__[Ruminococcus]; s__[Ruminococcus]_gnavus
otu2345	1.0	1.0	2.0	0.0	0.0	0.0	0.0	1.0	k__Bacteria; p__Proteobacteria; c__Betaproteobacteria; o__Burkholderiales; f__Comamonadaceae; g__Unclassified_Comamonadaceae; s__Unclassified_Comamonadaceae
otu2365	0.0	0.0	0.0	0.0	0.0	1.0	4.0	0.0	k__Bacteria; p__Bacteroidetes; c__Bacteroidia; o__Bacteroidales; f__Bacteroidaceae; g__Bacteroides; s__Unclassified_Bacteroides
otu2399	0.0	0.0	0.0	5.0	0.0	0.0	0.0	0.0	k__Bacteria; p__Bacteroidetes; c__Bacteroidia; o__Bacteroidales; f__Bacteroidaceae; g__Bacteroides; s__Unclassified_Bacteroides
otu2414	0.0	0.0	0.0	2.0	3.0	0.0	0.0	0.0	k__Bacteria; p__Firmicutes; c__Clostridia; o__Clostridiales; f__Ruminococcaceae; g__Oscillospira; s__Unclassified_Oscillospira
otu2445	0.0	0.0	0.0	5.0	0.0	0.0	0.0	0.0	k__Bacteria; p__Firmicutes; c__Clostridia; o__Clostridiales; f__Lachnospiraceae; g__Unclassified_Lachnospiraceae; s__Unclassified_Lachnospiraceae
otu2465	0.0	0.0	0.0	0.0	5.0	0.0	0.0	0.0	k__Bacteria; p__Proteobacteria; c__Gammaproteobacteria; o__Enterobacteriales; f__Enterobacteriaceae; g__Klebsiella; s__Unclassified_Klebsiella
otu2520	0.0	0.0	0.0	5.0	0.0	0.0	0.0	0.0	k__Bacteria; p__Firmicutes; c__Clostridia; o__Clostridiales; f__Lachnospiraceae; g__[Ruminococcus]; s__[Ruminococcus]_gnavus
otu2563	0.0	0.0	0.0	0.0	0.0	5.0	0.0	0.0	k__Bacteria; p__Actinobacteria; c__Actinobacteria; o__Actinomycetales; f__Micrococcaceae; g__Micrococcus; s__Unclassified_Micrococcus
otu2596	0.0	5.0	0.0	0.0	0.0	0.0	0.0	0.0	k__Bacteria; p__Firmicutes; c__Clostridia; o__Clostridiales; f__Ruminococcaceae; g__Unclassified_Ruminococcaceae; s__Unclassified_Ruminococcaceae
otu2597	5.0	0.0	0.0	0.0	0.0	0.0	0.0	0.0	k__Bacteria; p__Firmicutes; c__Clostridia; o__Clostridiales; f__Ruminococcaceae; g__Unclassified_Ruminococcaceae; s__Unclassified_Ruminococcaceae
otu2605	0.0	5.0	0.0	0.0	0.0	0.0	0.0	0.0	k__Bacteria; p__Bacteroidetes; c__Bacteroidia; o__Bacteroidales; f__Porphyromonadaceae; g__Unclassified_Porphyromonadaceae; s__Unclassified_Porphyromonadaceae
otu2636	0.0	0.0	0.0	0.0	0.0	5.0	0.0	0.0	k__Bacteria; p__Firmicutes; c__Clostridia; o__Clostridiales; f__Ruminococcaceae; g__Ruminococcus; s__Unclassified_Ruminococcus
otu2666	0.0	0.0	0.0	1.0	0.0	0.0	4.0	0.0	k__Bacteria; p__Firmicutes; c__Clostridia; o__Clostridiales; f__Lachnospiraceae; g__Epulopiscium; s__Unclassified_Epulopiscium
otu2671	0.0	0.0	0.0	0.0	0.0	5.0	0.0	0.0	k__Bacteria; p__Firmicutes; c__Clostridia; o__Clostridiales; f__Ruminococcaceae; g__Ruminococcus; s__Unclassified_Ruminococcus
otu2674	0.0	0.0	0.0	0.0	1.0	4.0	0.0	0.0	k__Bacteria; p__Firmicutes; c__Clostridia; o__Clostridiales; f__Unclassified_Clostridiales; g__Unclassified_Clostridiales; s__Unclassified_Clostridiales
otu2690	5.0	0.0	0.0	0.0	0.0	0.0	0.0	0.0	k__Bacteria; p__Bacteroidetes; c__Bacteroidia; o__Bacteroidales; f__S24-7; g__Unclassified_S24-7; s__Unclassified_S24-7
otu2726	0.0	5.0	0.0	0.0	0.0	0.0	0.0	0.0	k__Bacteria; p__Proteobacteria; c__Betaproteobacteria; o__Burkholderiales; f__Unclassified_Burkholderiales; g__Unclassified_Burkholderiales; s__Unclassified_Burkholderiales
otu2742	0.0	0.0	0.0	0.0	0.0	1.0	4.0	0.0	k__Bacteria; p__Proteobacteria; c__Gammaproteobacteria; o__Enterobacteriales; f__Enterobacteriaceae; g__Unclassified_Enterobacteriaceae; s__Unclassified_Enterobacteriaceae
otu2746	0.0	0.0	0.0	0.0	0.0	0.0	5.0	0.0	k__Bacteria; p__Firmicutes; c__Clostridia; o__Clostridiales; f__Veillonellaceae; g__Veillonella; s__Veillonella_dispar
[truncated: 505 more rows]
