# Supplementary material for: Effects of changes on gut microbiota in children with acute Kawasaki disease
Source: PeerJ journal article supplement (doi:10.7717/peerj.9698), 2020-08-06
Supplement: Supplemental_File.zip [file Supplemental_File.zip]

-  k\_\_Bacteria;p\_\_Firmicutes
-  k\_\_Bacteria;p\_\_Bacteroidetes
-  k\_\_Bacteria;p\_\_Proteobacteria
-  k\_\_Bacteria;p\_\_Actinobacteria
-  k\_\_Bacteria;p\_\_Cyanobacteria
-  k\_\_Bacteria;p\_\_TM7
-  k\_\_Bacteria;p\_\_[Thermi]
-  k\_\_Bacteria;p\_\_Acidobacteria
-  k\_\_Bacteria;p\_\_Verrucomicrobia
-  k\_\_Bacteria;p\_\_Fusobacteria
-  k\_\_Bacteria;p\_\_Gemmatimonadetes
