# Supplementary material for: Effects of changes on gut microbiota in children with acute Kawasaki disease
Source: PeerJ journal article supplement (doi:10.7717/peerj.9698), 2020-08-06
Supplement: Supplemental_File.zip [file Supplemental_File.zip]

k\_Bacteria;p\_Firmicutes;c\_Clostridia;o\_Clostridiales  
k\_Bacteria;p\_Bacteroidetes;c\_Bacteroidia;o\_Bacteroidales  
k\_Bacteria;p\_Firmicutes;c\_Bacilli;o\_Lactobacillales  
k\_Bacteria;p\_Proteobacteria;c\_Gammaproteobacteria;o\_Enterobacteriales  
k\_Bacteria;p\_Actinobacteria;c\_Actinobacteria;o\_Bifidobacteriales  
k\_Bacteria;p\_Firmicutes;c\_Erysipelotrichi;o\_Erysipelotrichales  
k\_Bacteria;p\_Proteobacteria;c\_Betaproteobacteria;o\_Burkholderiales  
k\_Bacteria;p\_Proteobacteria;c\_Gammaproteobacteria;o\_Pseudomonadales  
k\_Bacteria;p\_Actinobacteria;c\_Actinobacteria;o\_Actinomycetales  
k\_Bacteria;p\_Actinobacteria;c\_Coriobacteriia;o\_Coriobacteriales  
k\_Bacteria;p\_Proteobacteria;c\_Deltaproteobacteria;o\_Desulfovibrionales  
k\_Bacteria;p\_Proteobacteria;c\_Gammaproteobacteria;o\_Xanthomonadales  
k\_Bacteria;p\_Proteobacteria;c\_Alphaproteobacteria;o\_Rhizobiales  
k\_Bacteria;p\_TM7;c\_TM7-3;o\_Unclassified\_TM7-3  
k\_Bacteria;p\_Cyanobacteria;c\_Chloroplast;o\_Streptophyta  
k\_Bacteria;p\_Proteobacteria;c\_Alphaproteobacteria;o\_Caulobacteriales  
k\_Bacteria;p\_Firmicutes;c\_Bacilli;o\_Bacillales  
k\_Bacteria;p\_Proteobacteria;c\_Gammaproteobacteria;o\_Pasteurellales  
k\_Bacteria;p\_Proteobacteria;c\_Gammaproteobacteria;o\_Alteromonadales  
k\_Bacteria;p\_Proteobacteria;c\_Alphaproteobacteria;o\_Sphingomonadales  
k\_Bacteria;p\_[Thermi];c\_Deinococci;o\_Thermales  
k\_Bacteria;p\_Proteobacteria;c\_Gammaproteobacteria;o\_Aeromonadales  
k\_Bacteria;p\_Actinobacteria;c\_Acidimicrobiia;o\_Acidimicrobiales  
k\_Bacteria;p\_Proteobacteria;c\_Alphaproteobacteria;o\_RF32  
k\_Bacteria;p\_Bacteroidetes;c\_[Saprospirae];o\_[Saprospirales]  
k\_Bacteria;p\_Acidobacteria;c\_iii1-8;o\_SJA-36  
k\_Bacteria;p\_Acidobacteria;c\_Acidobacteria-6;o\_iii1-15  
k\_Bacteria;p\_Proteobacteria;c\_Epsilonproteobacteria;o\_Campylobacteriales  
k\_Bacteria;p\_Proteobacteria;c\_Betaproteobacteria;o\_Rhodocyclales  
k\_Bacteria;p\_Bacteroidetes;c\_Sphingobacteriia;o\_Sphingobacteriales  
k\_Bacteria;p\_Firmicutes;c\_Bacilli;o\_Gemellales  
k\_Bacteria;p\_Verrucomicrobia;c\_Verrucomicrobiae;o\_Verrucomicrobiales  
k\_Bacteria;p\_Fusobacteria;c\_Fusobacteriia;o\_Fusobacteriales  
k\_Bacteria;p\_Proteobacteria;c\_Alphaproteobacteria;o\_Rhodobacteriales  
k\_Bacteria;p\_Gemmatimonadetes;c\_Gemm-1;o\_Unclassified\_Gemm-1  
k\_Bacteria;p\_Proteobacteria;c\_Deltaproteobacteria;o\_Syntrophobacteriales  
k\_Bacteria;p\_Cyanobacteria;c\_Chloroplast;o\_Stromatolites  
k\_Bacteria;p\_Cyanobacteria;c\_4C0d-2;o\_MLE1-12
