# Supplementary figures and images for: Effects of changes on gut microbiota in children with acute Kawasaki disease
Source: PeerJ journal article supplement (doi:10.7717/peerj.9698), 2020-08-06

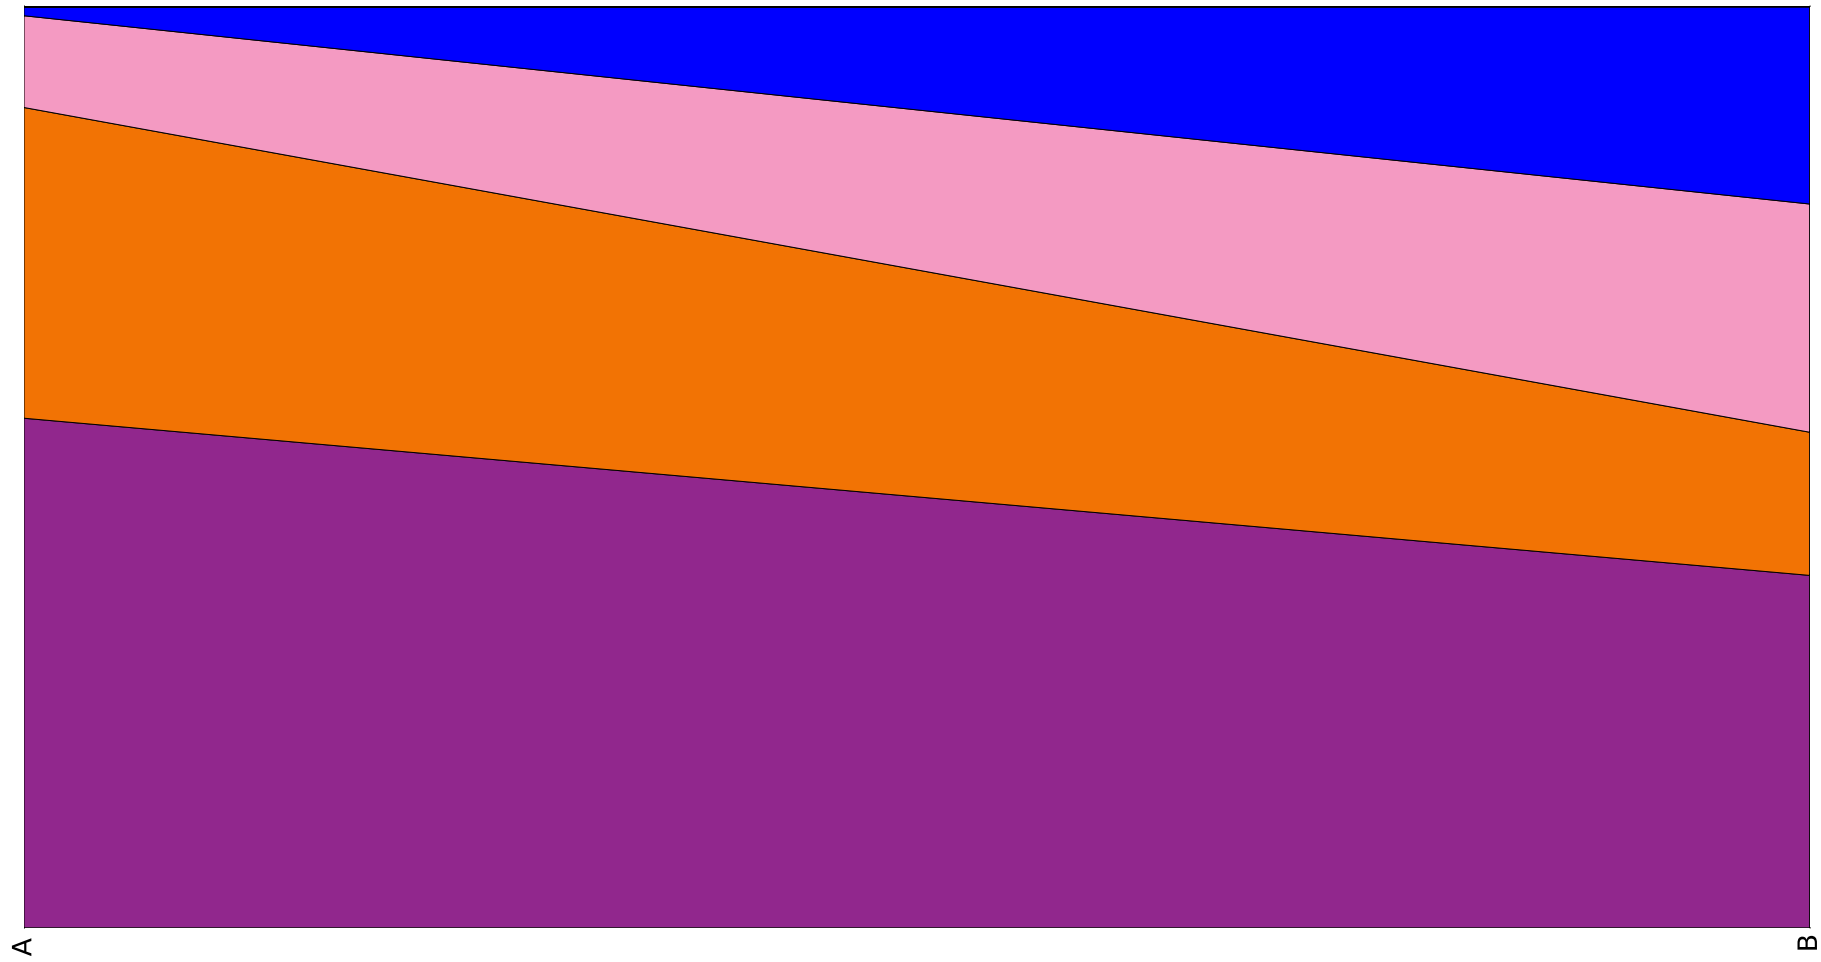

Supplement: Supplemental_File.zip [file Supplemental_File.zip]

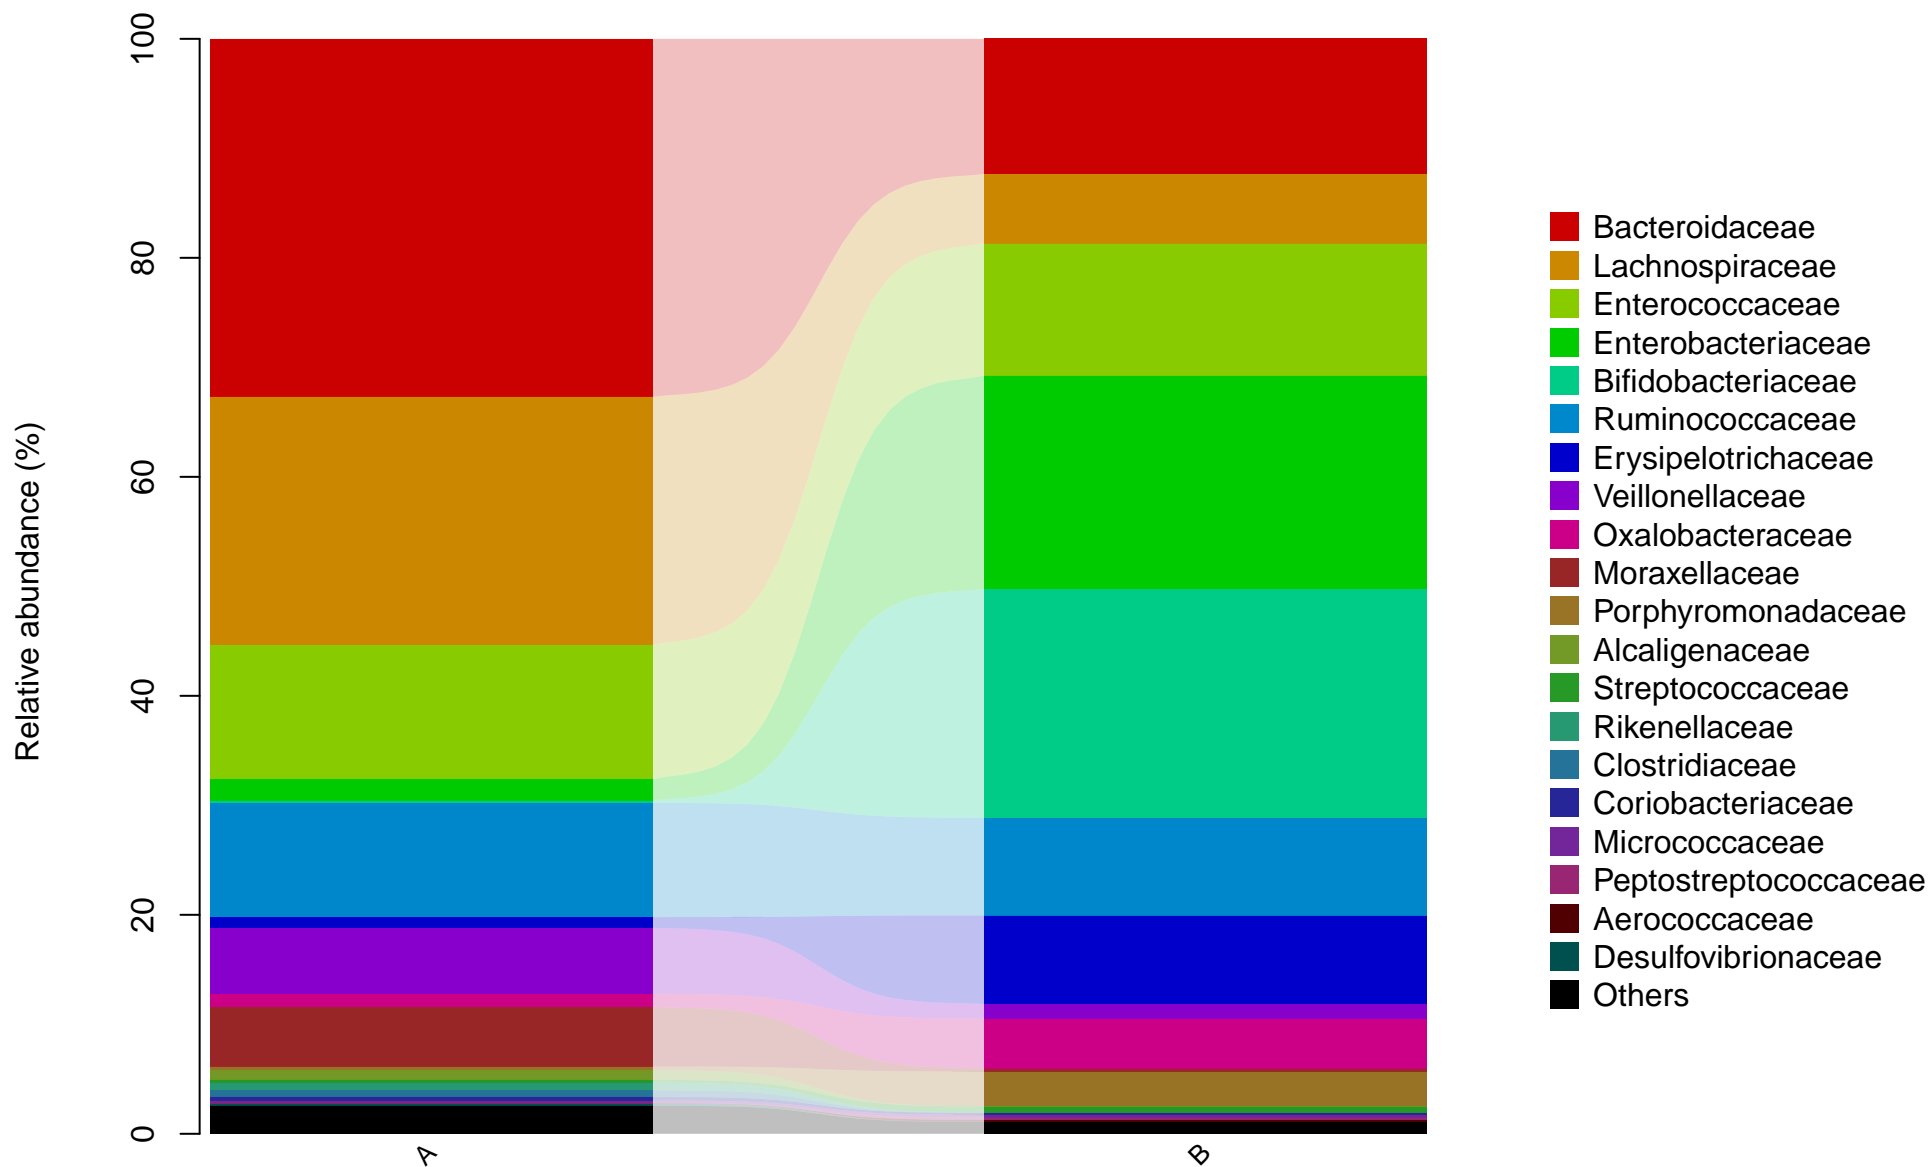

Supplement: Supplemental_File.zip [file Supplemental_File.zip]

A

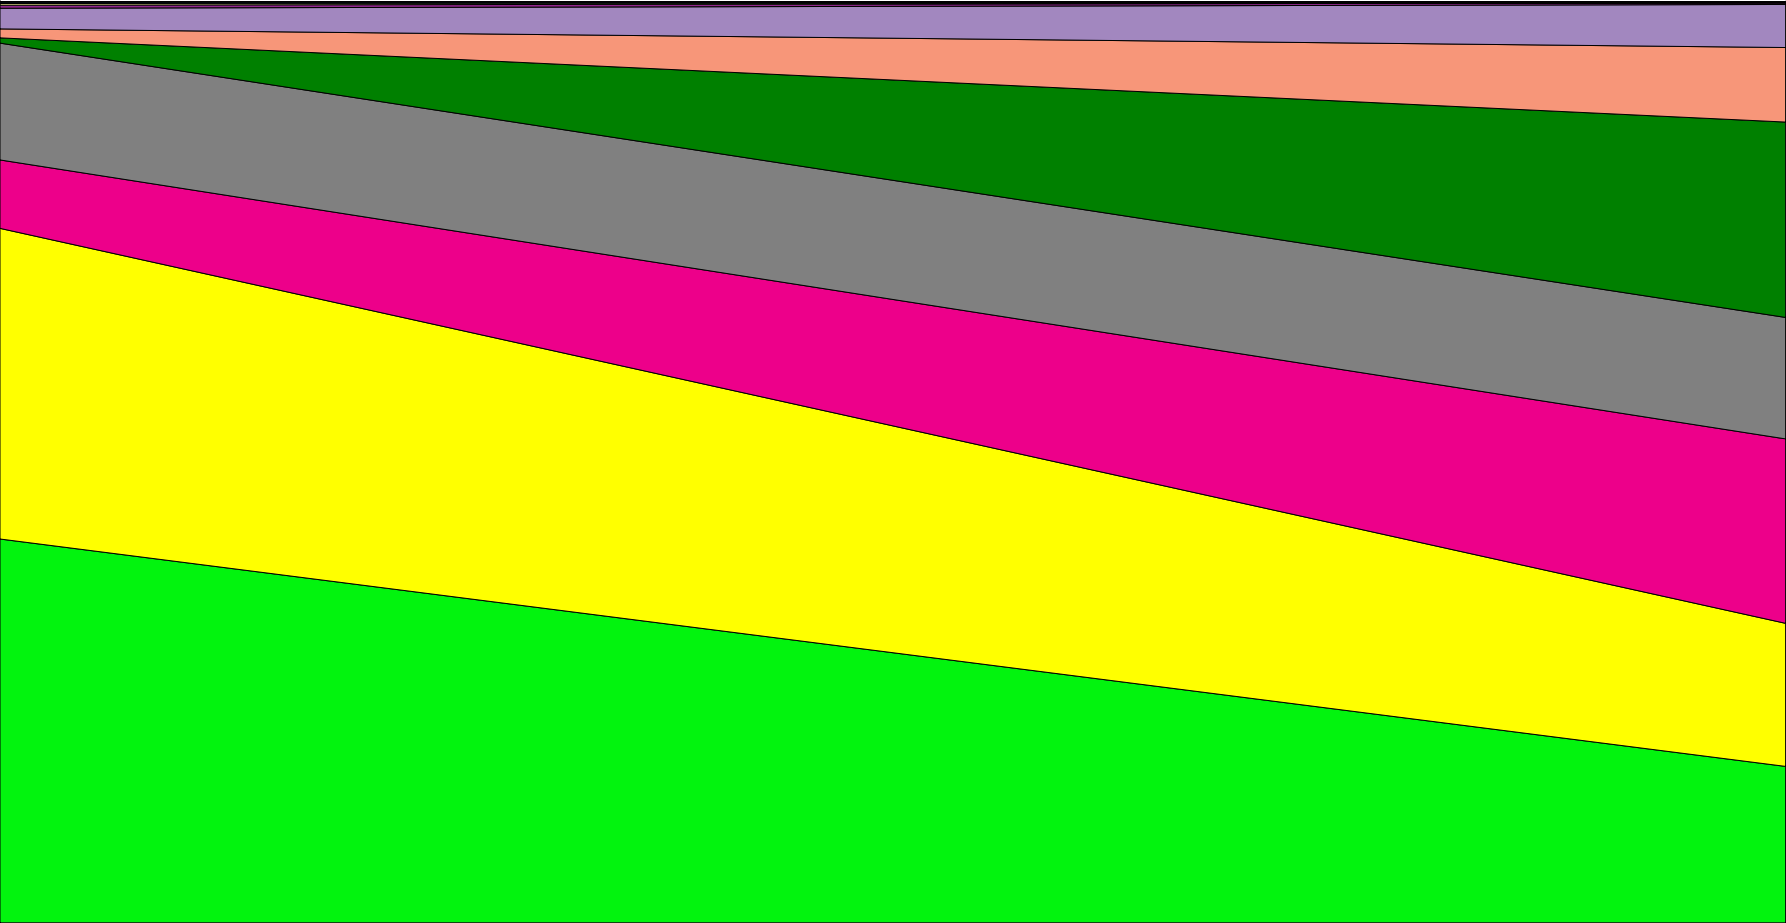

B

Supplement: Supplemental_File.zip [file Supplemental_File.zip]

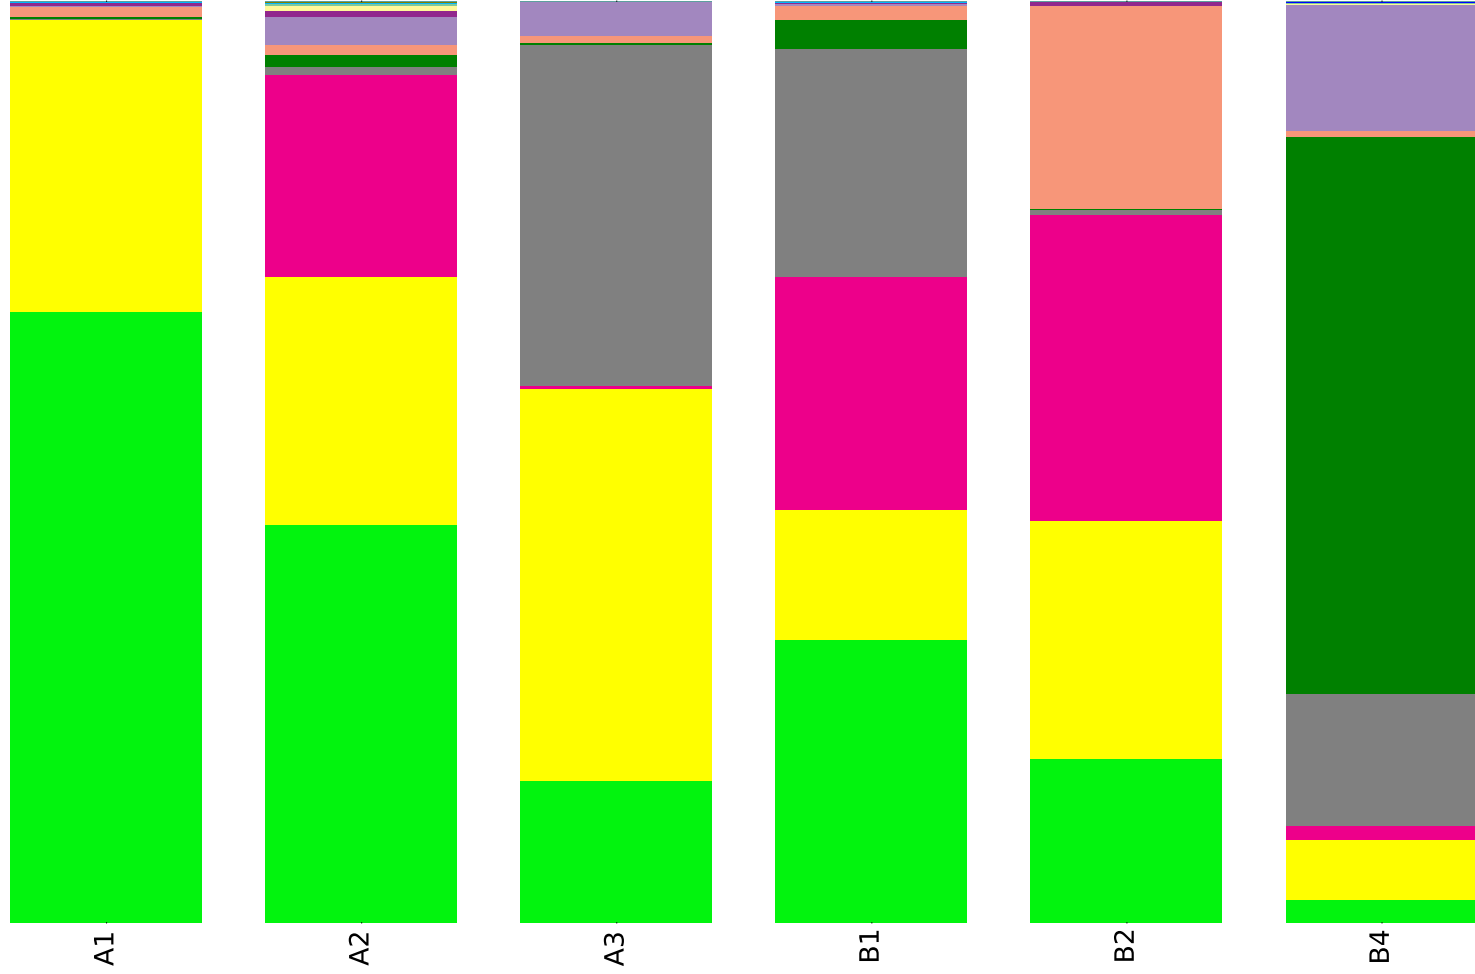

Supplement: Supplemental_File.zip [file Supplemental_File.zip]

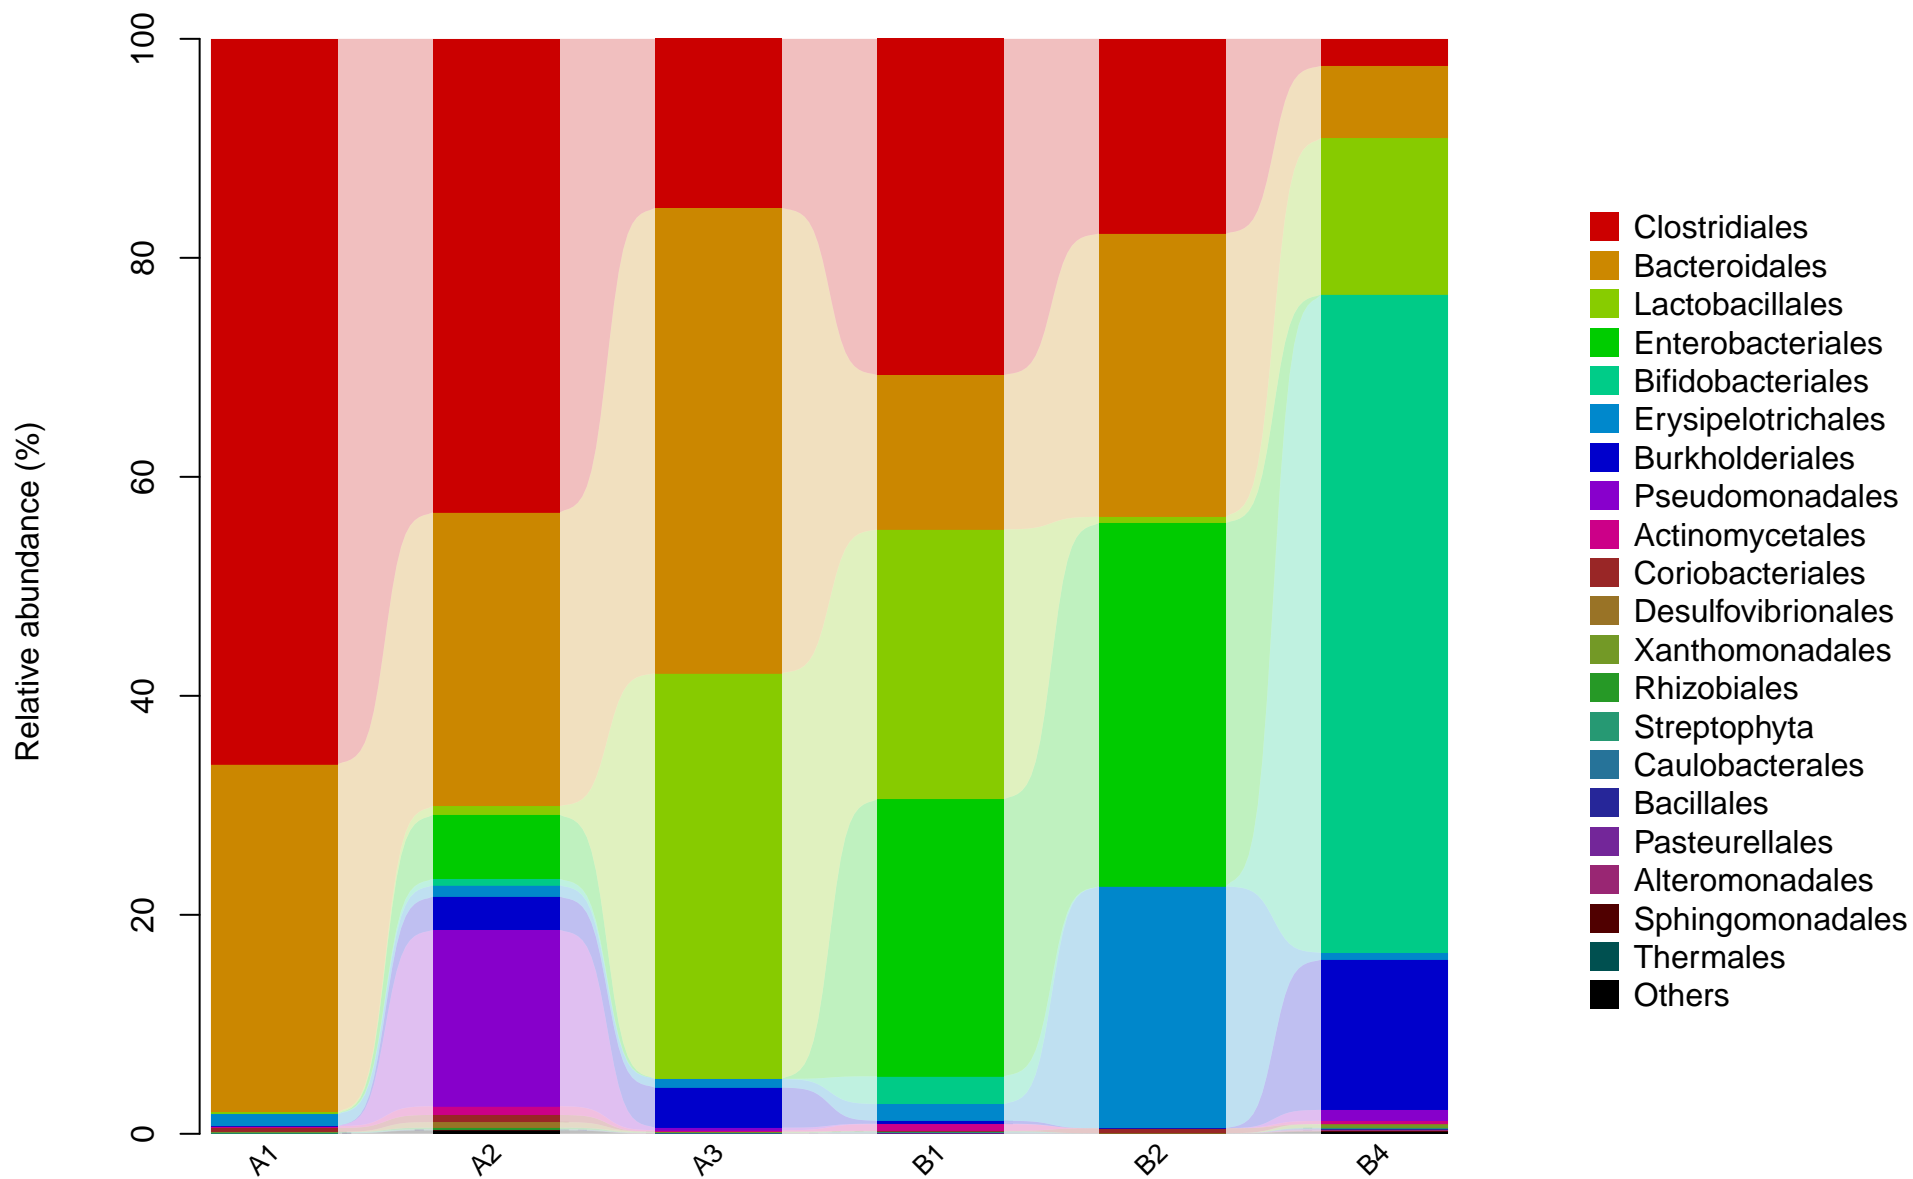

Supplement: Supplemental_File.zip [file Supplemental_File.zip]

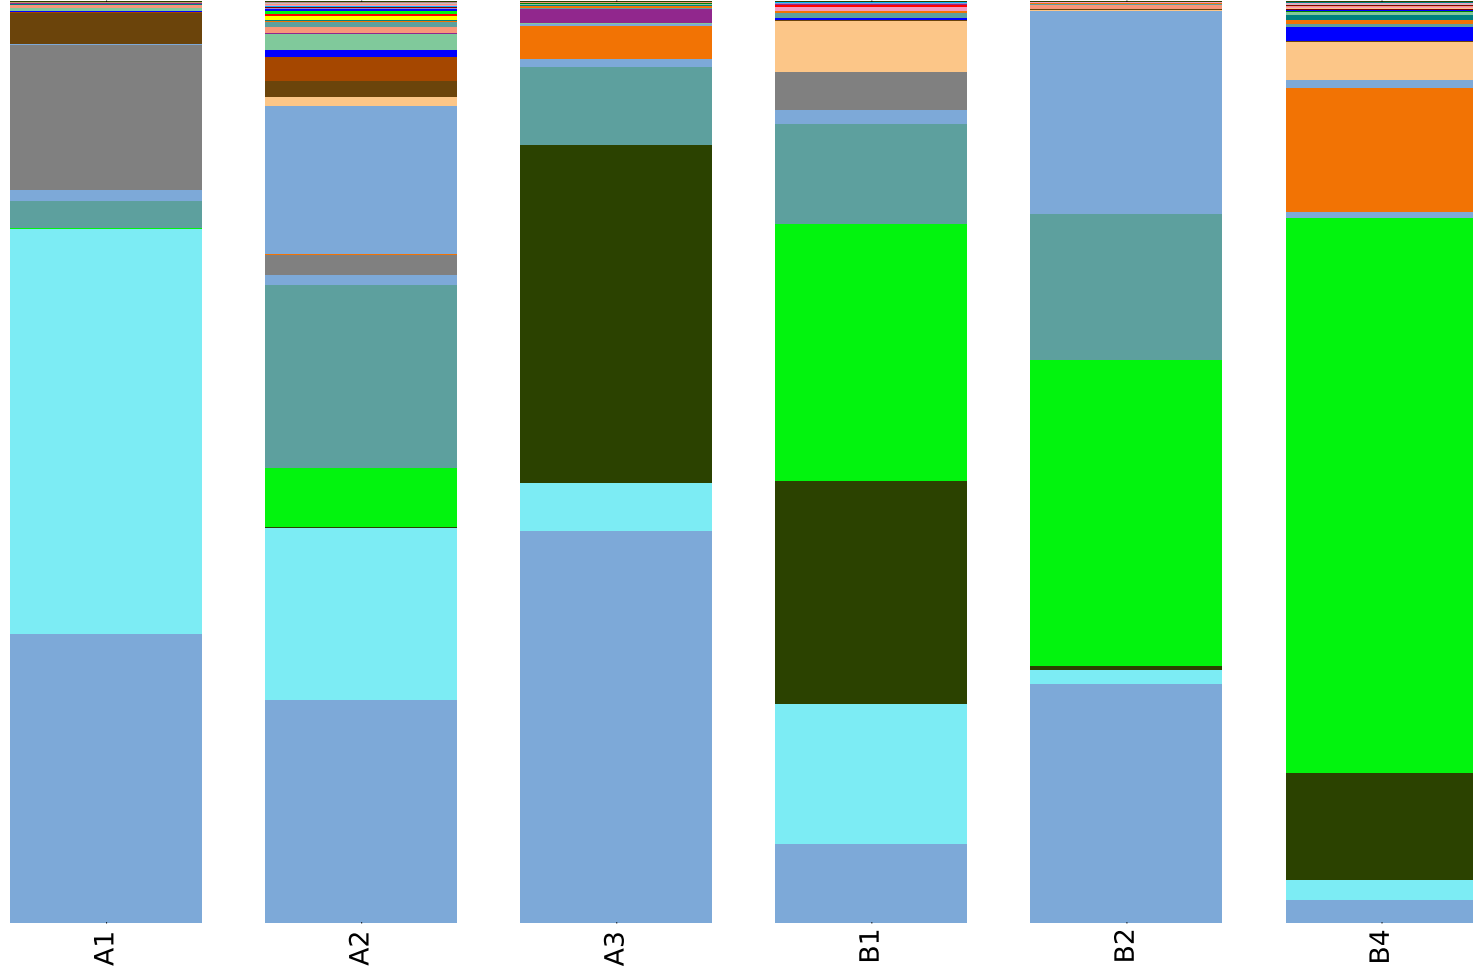

Supplement: Supplemental_File.zip [file Supplemental_File.zip]

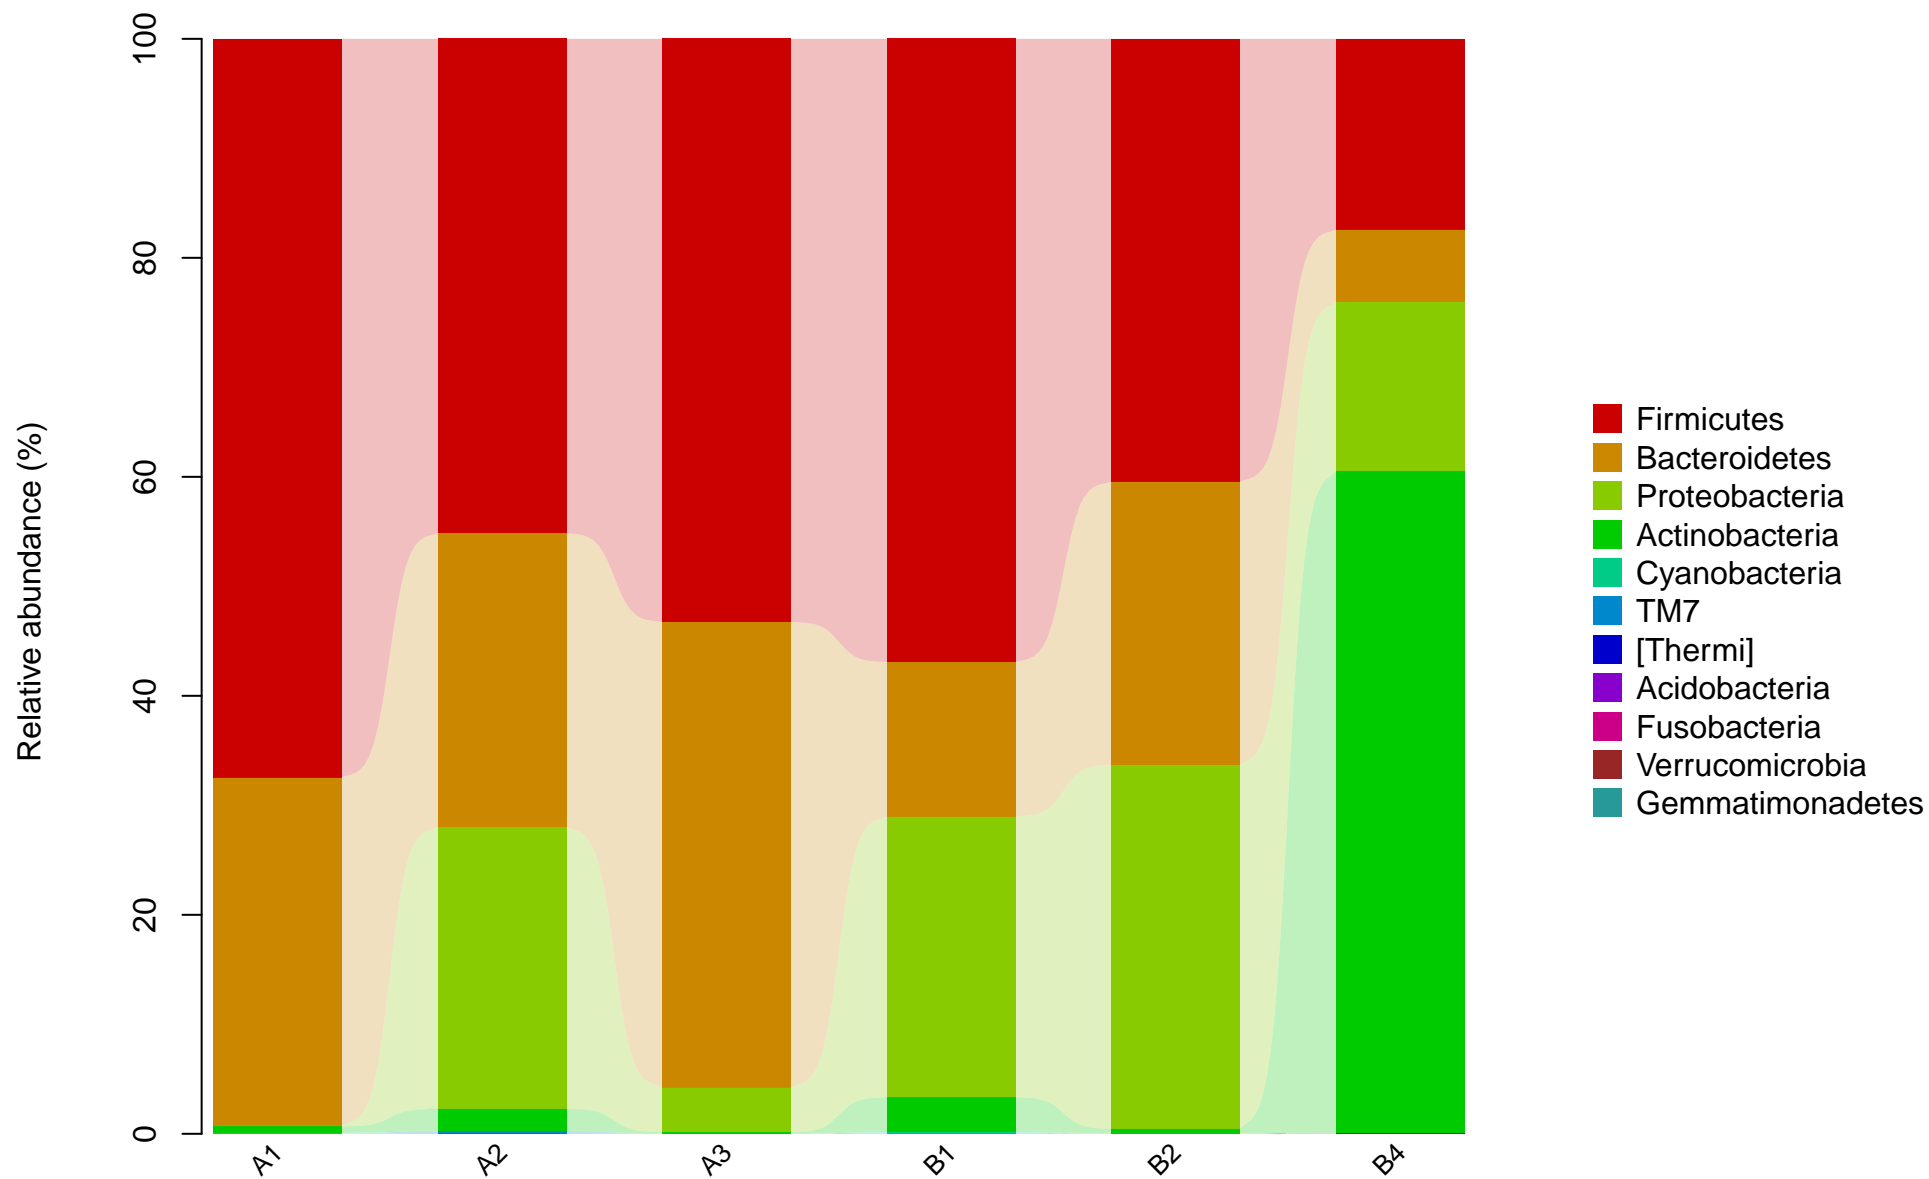

Supplement: Supplemental_File.zip [file Supplemental_File.zip]

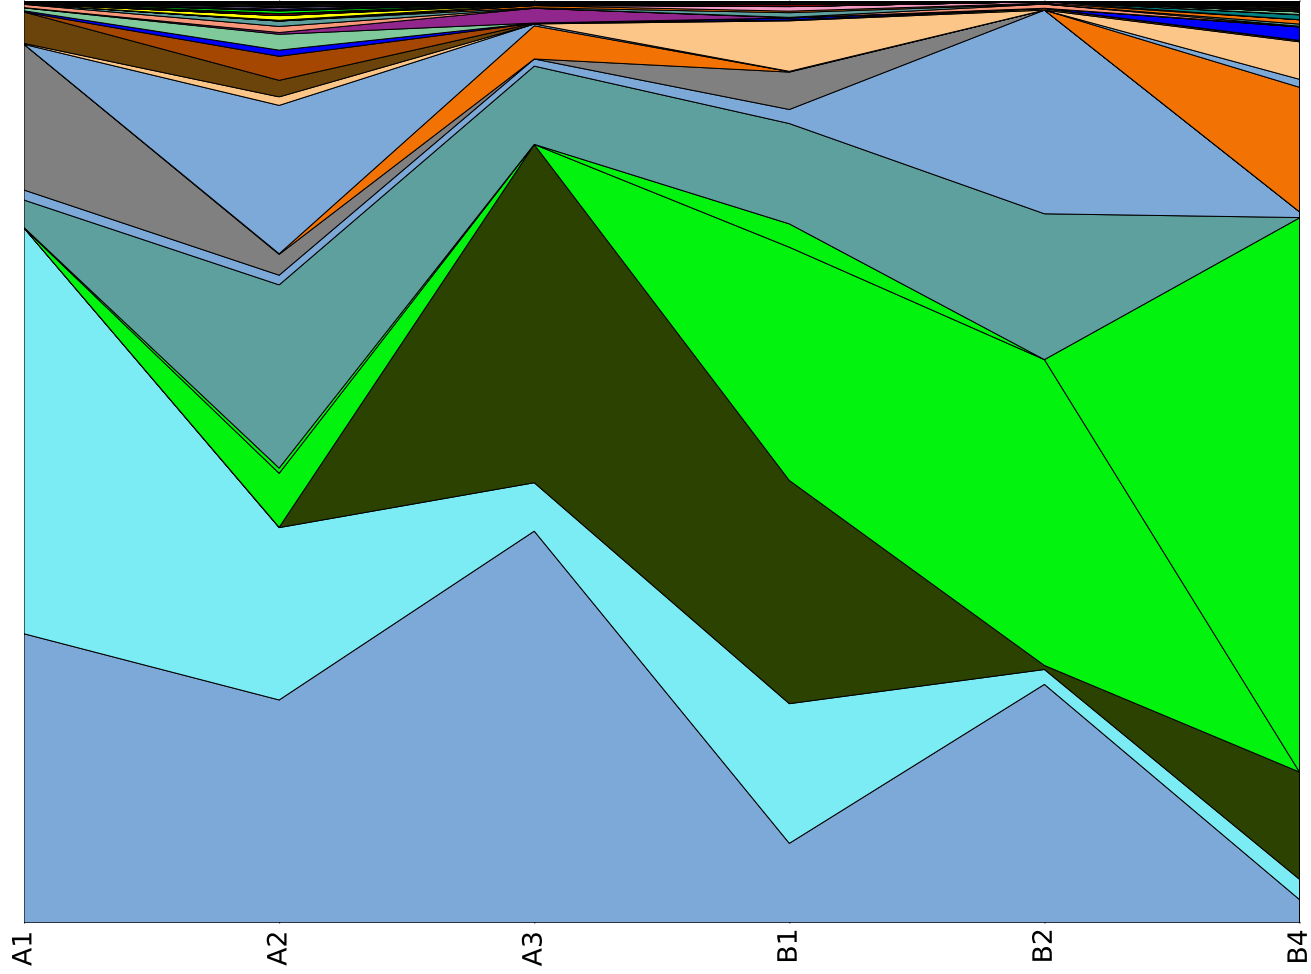

Supplement: Supplemental_File.zip [file Supplemental_File.zip]

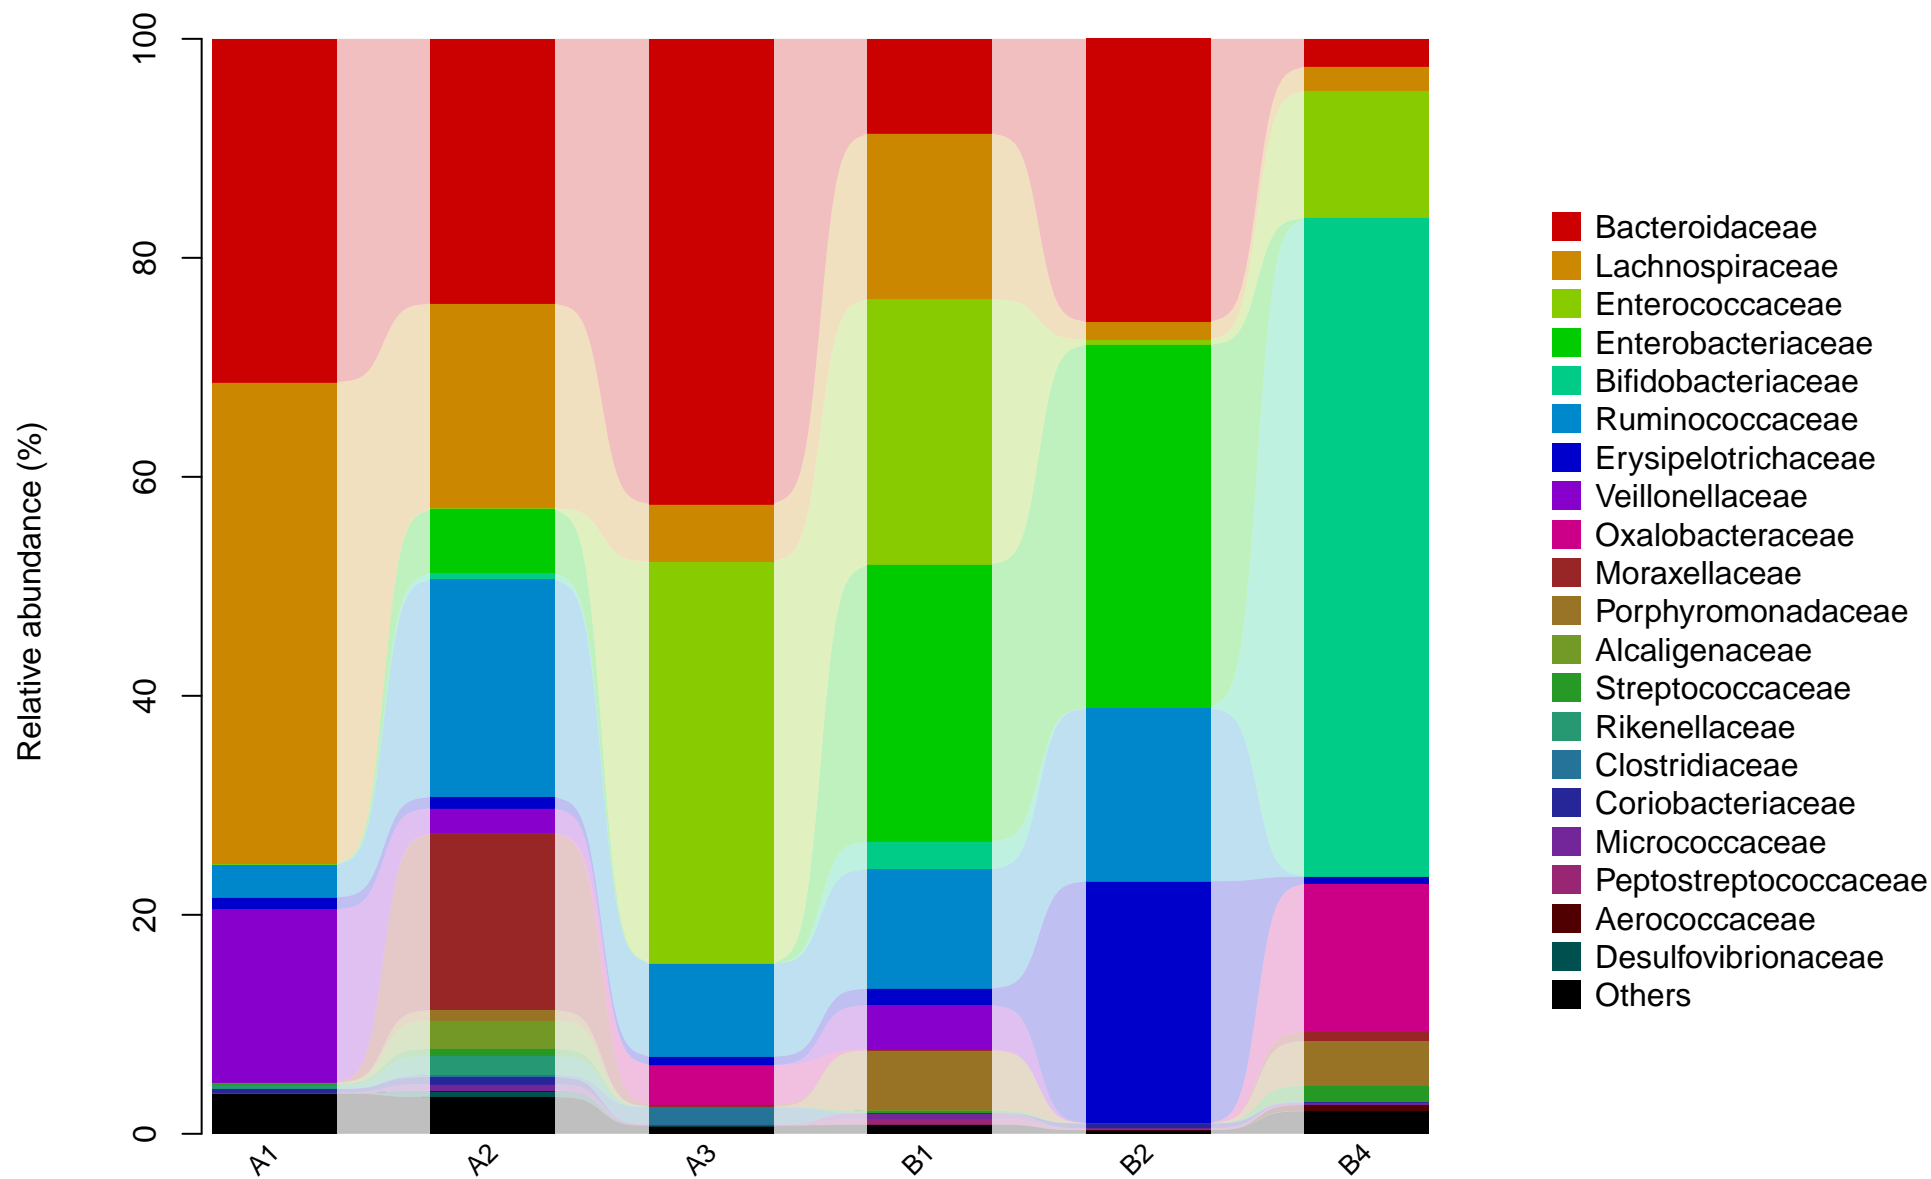

Supplement: Supplemental_File.zip [file Supplemental_File.zip]

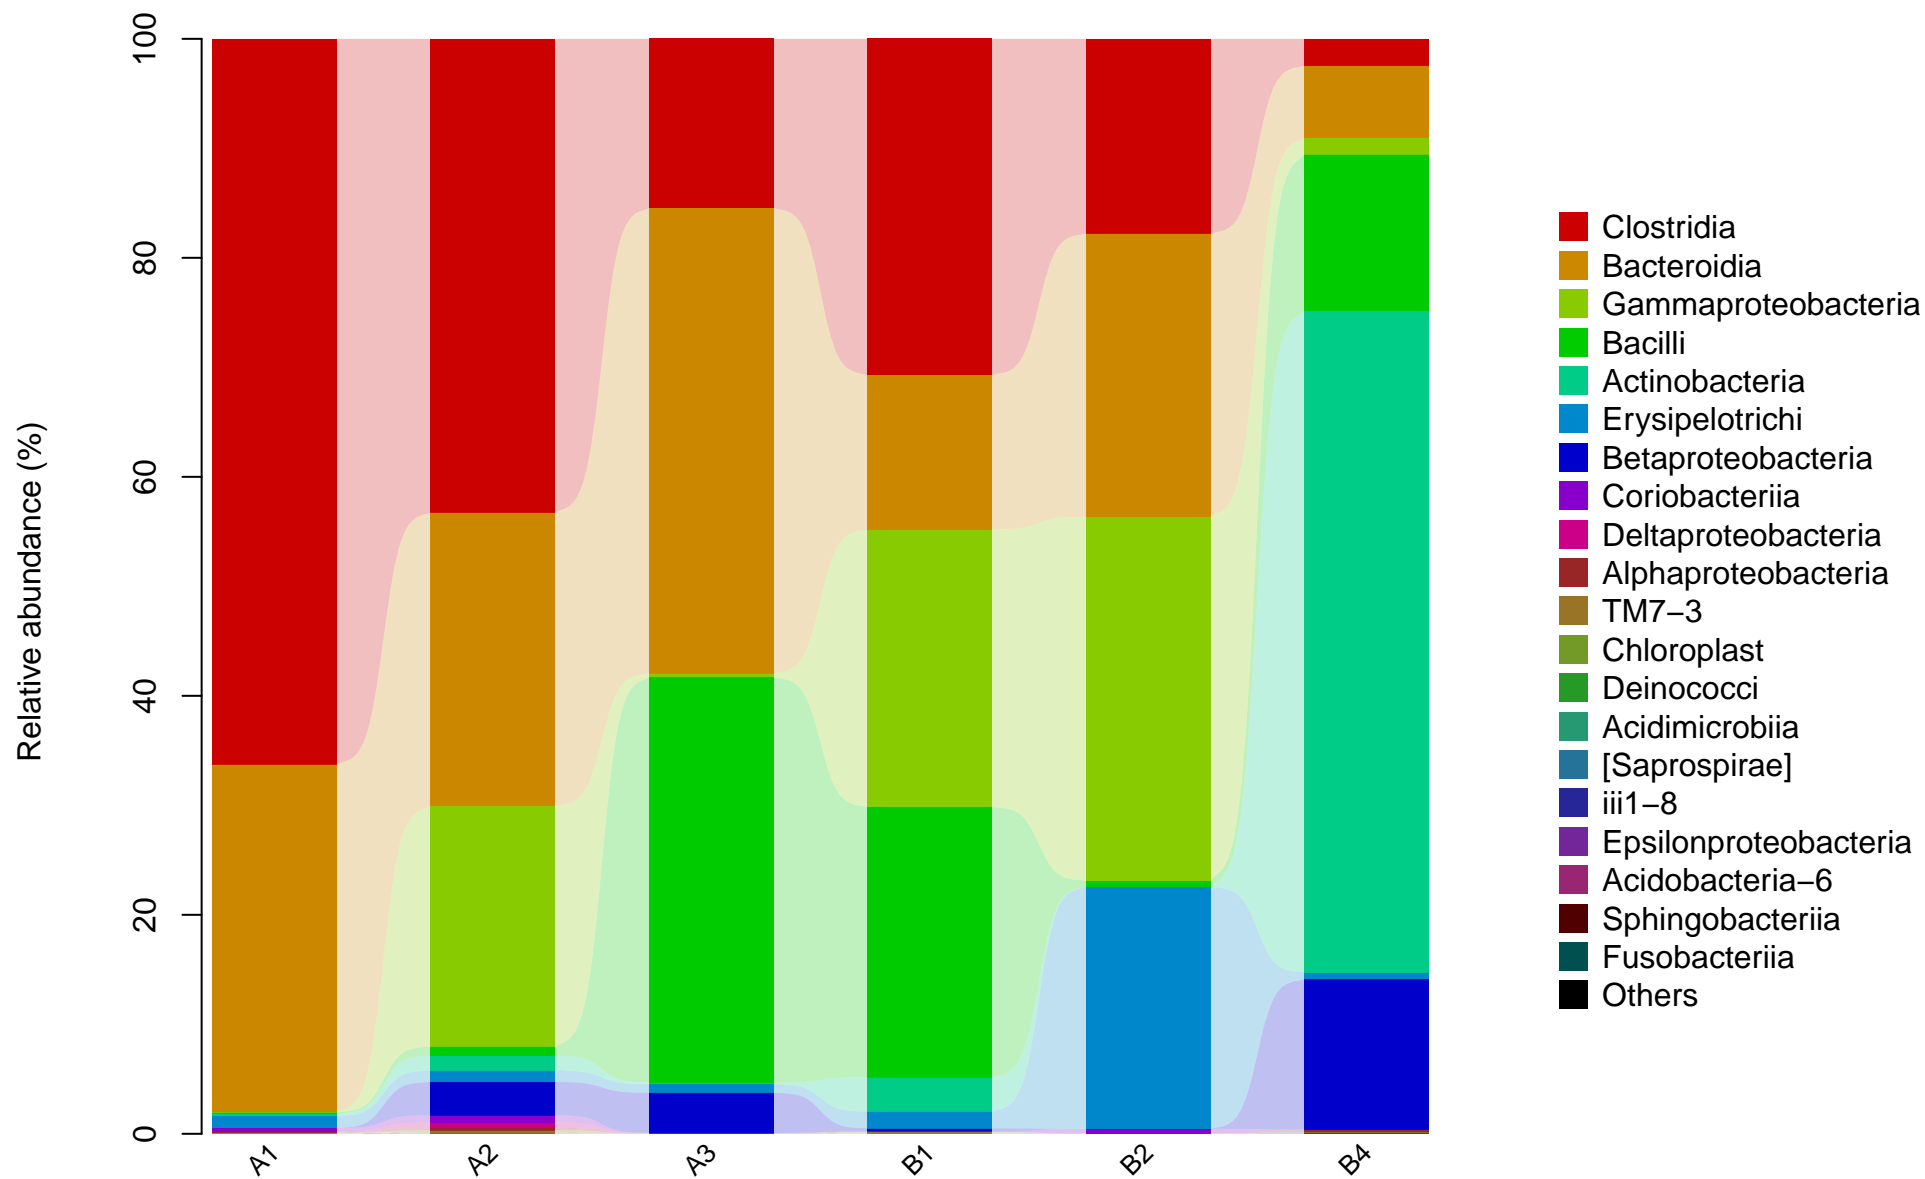

Supplement: Supplemental_File.zip [file Supplemental_File.zip]

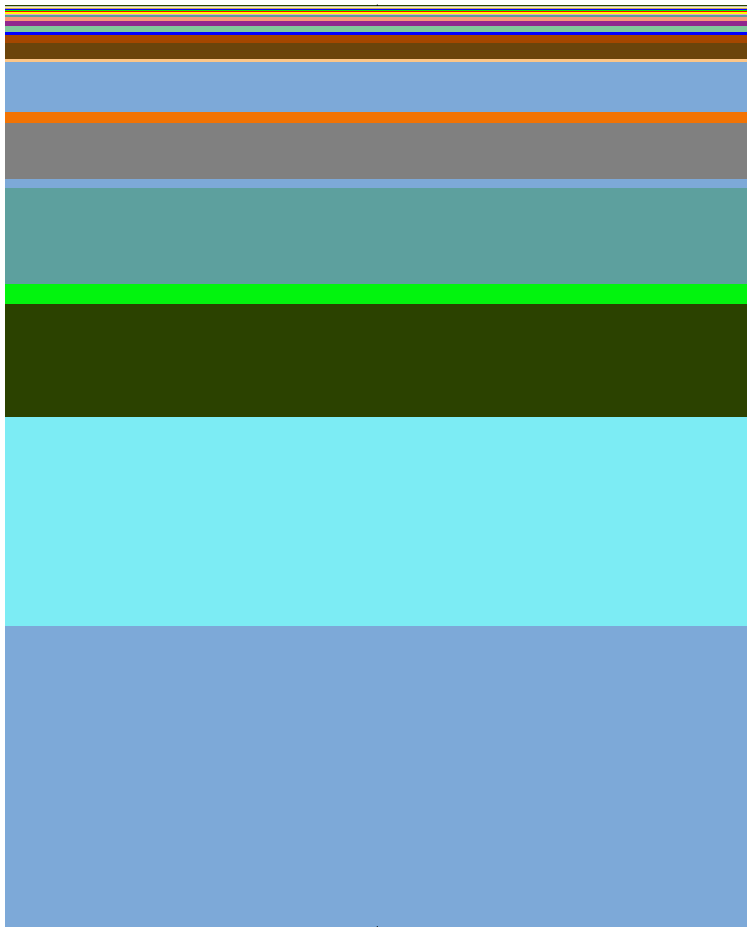

A

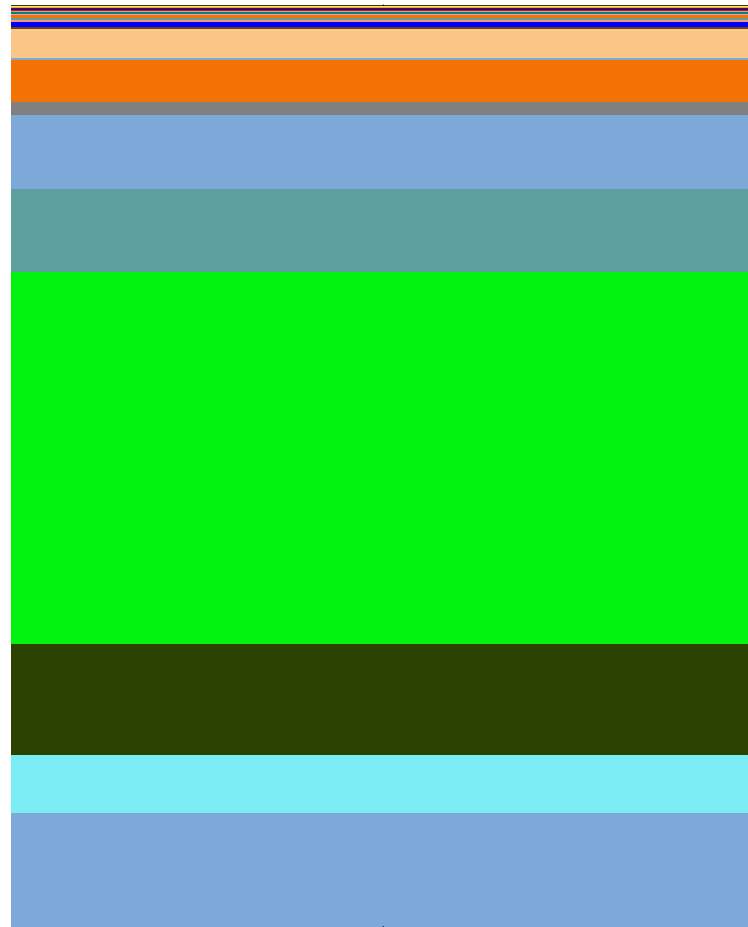

B

Supplement: Supplemental_File.zip [file Supplemental_File.zip]

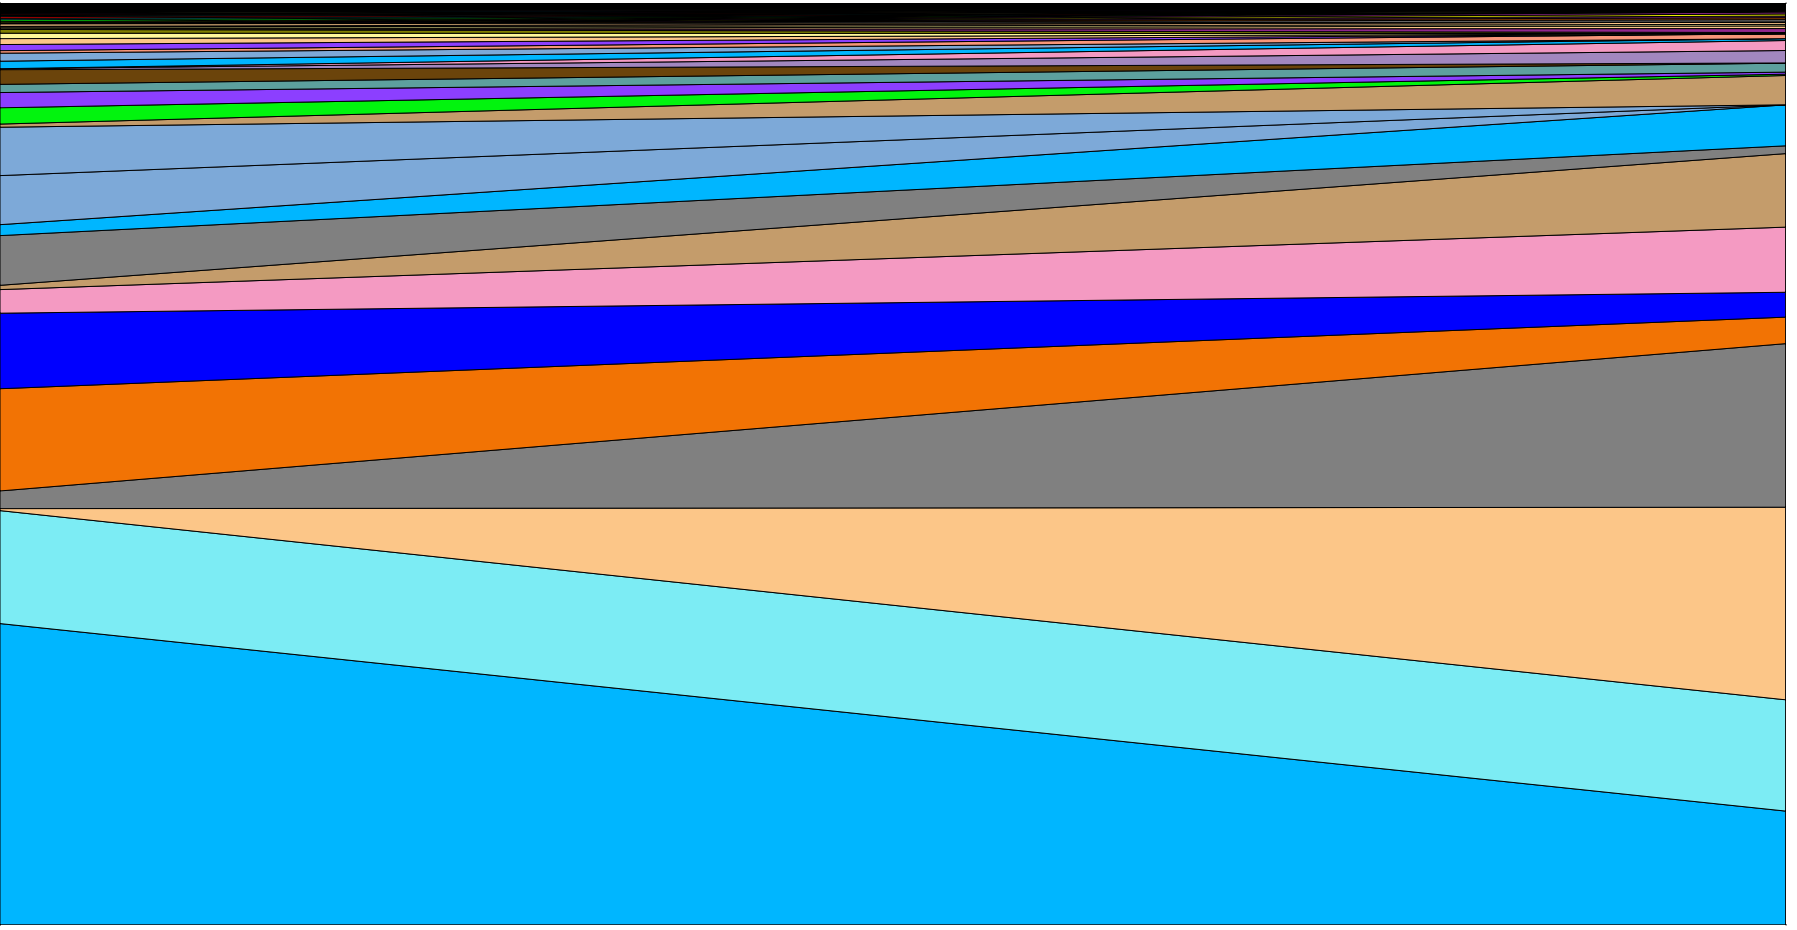

A

B

Supplement: Supplemental_File.zip [file Supplemental_File.zip]

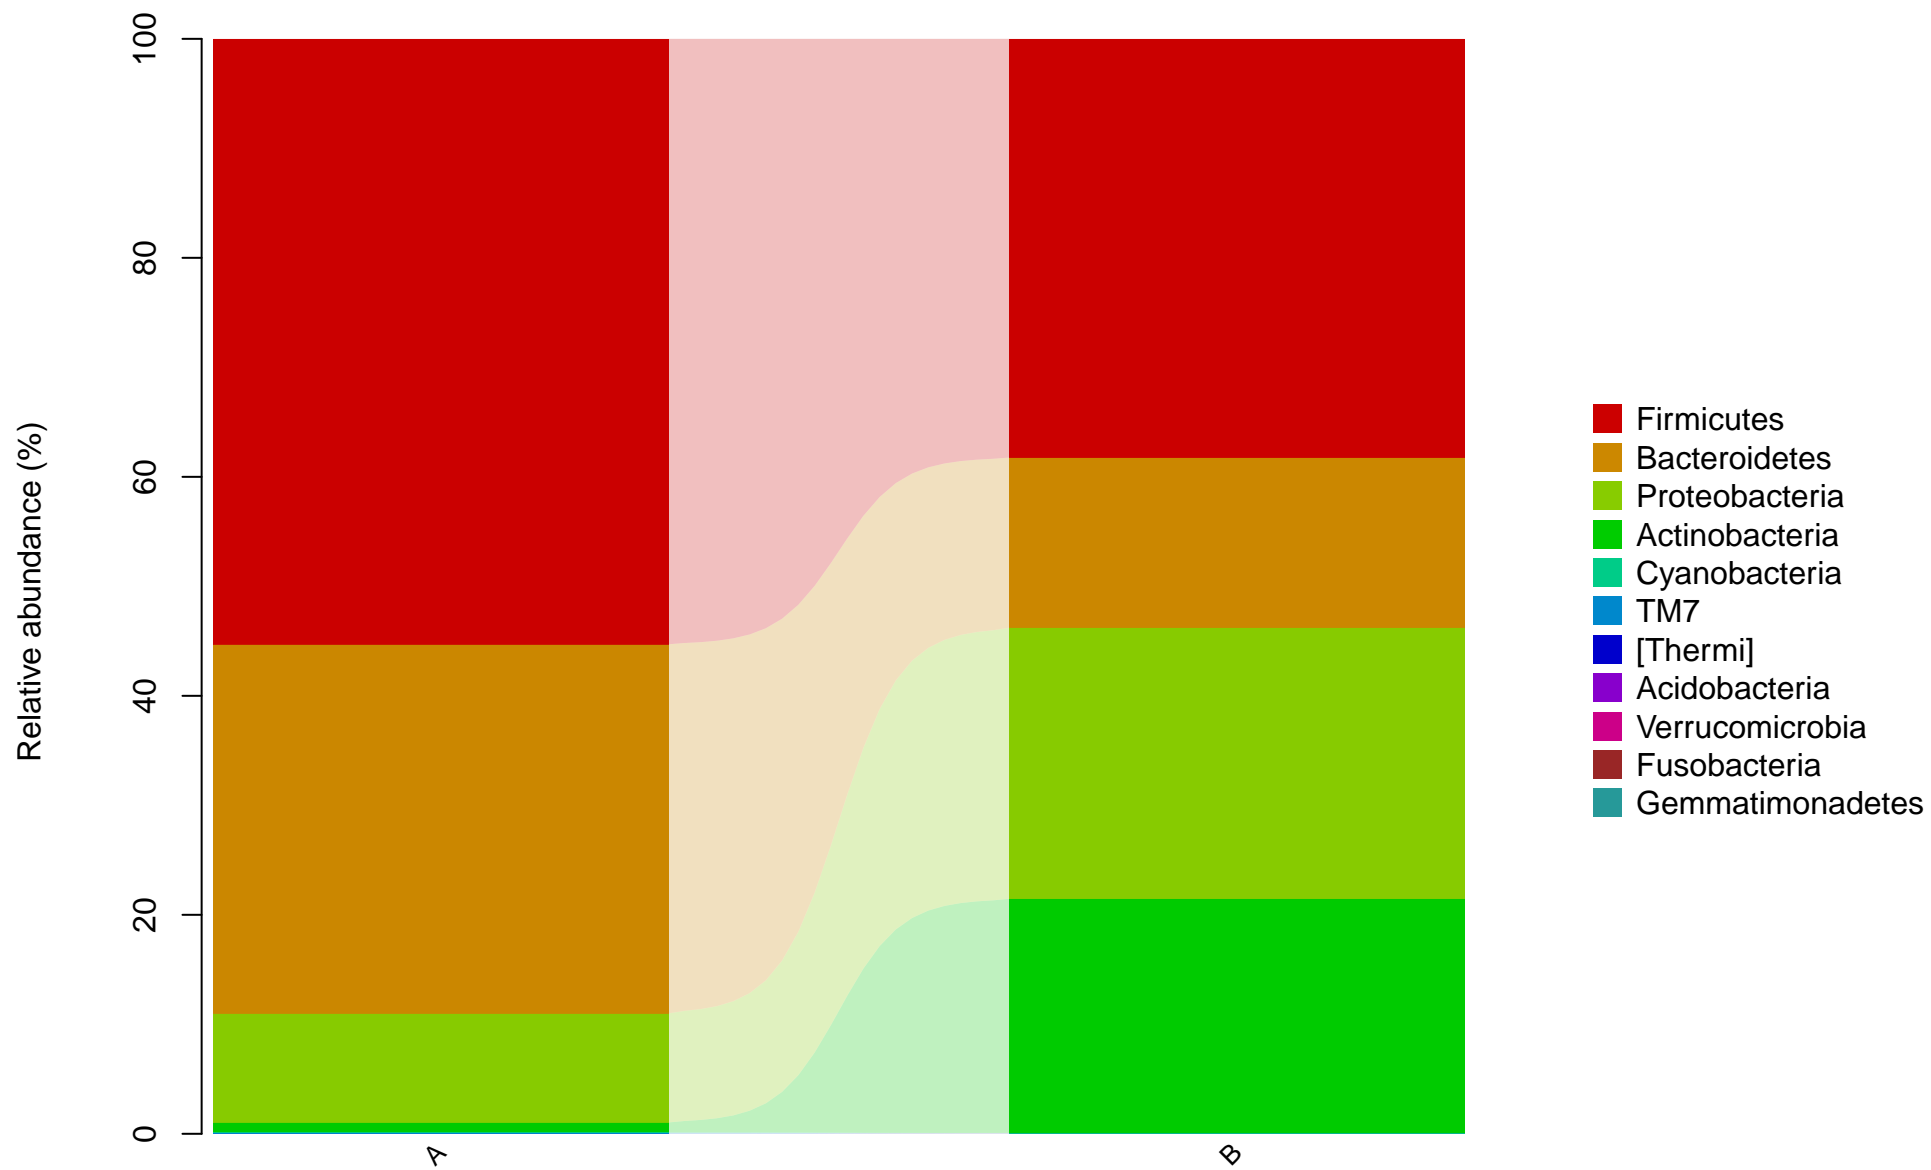

Supplement: Supplemental_File.zip [file Supplemental_File.zip]

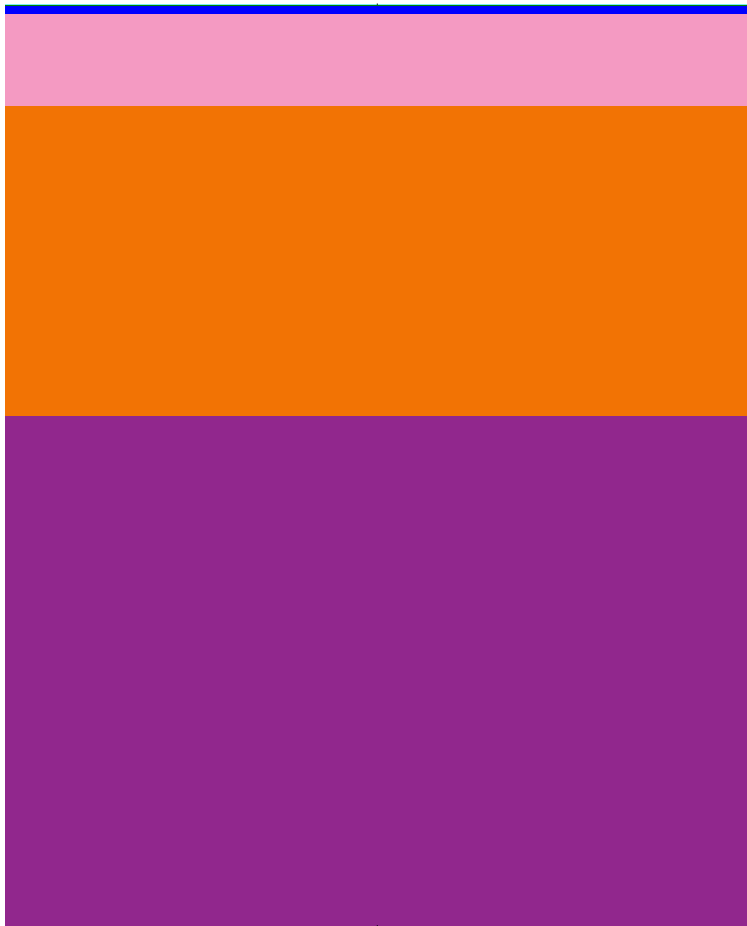

A

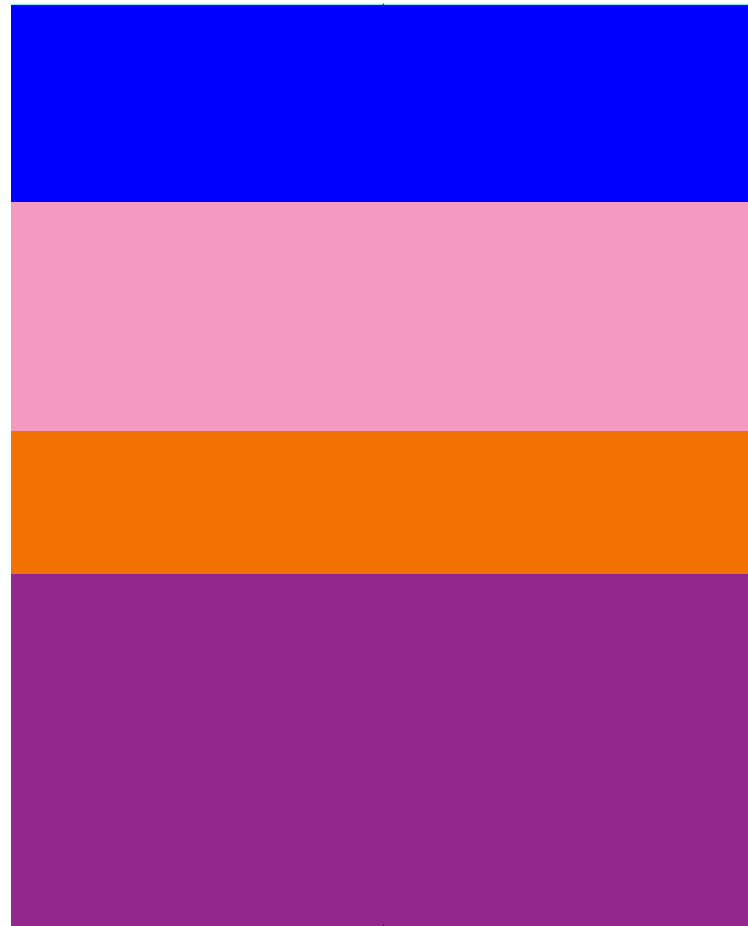

B

Supplement: Supplemental_File.zip [file Supplemental_File.zip]

Length Distribution

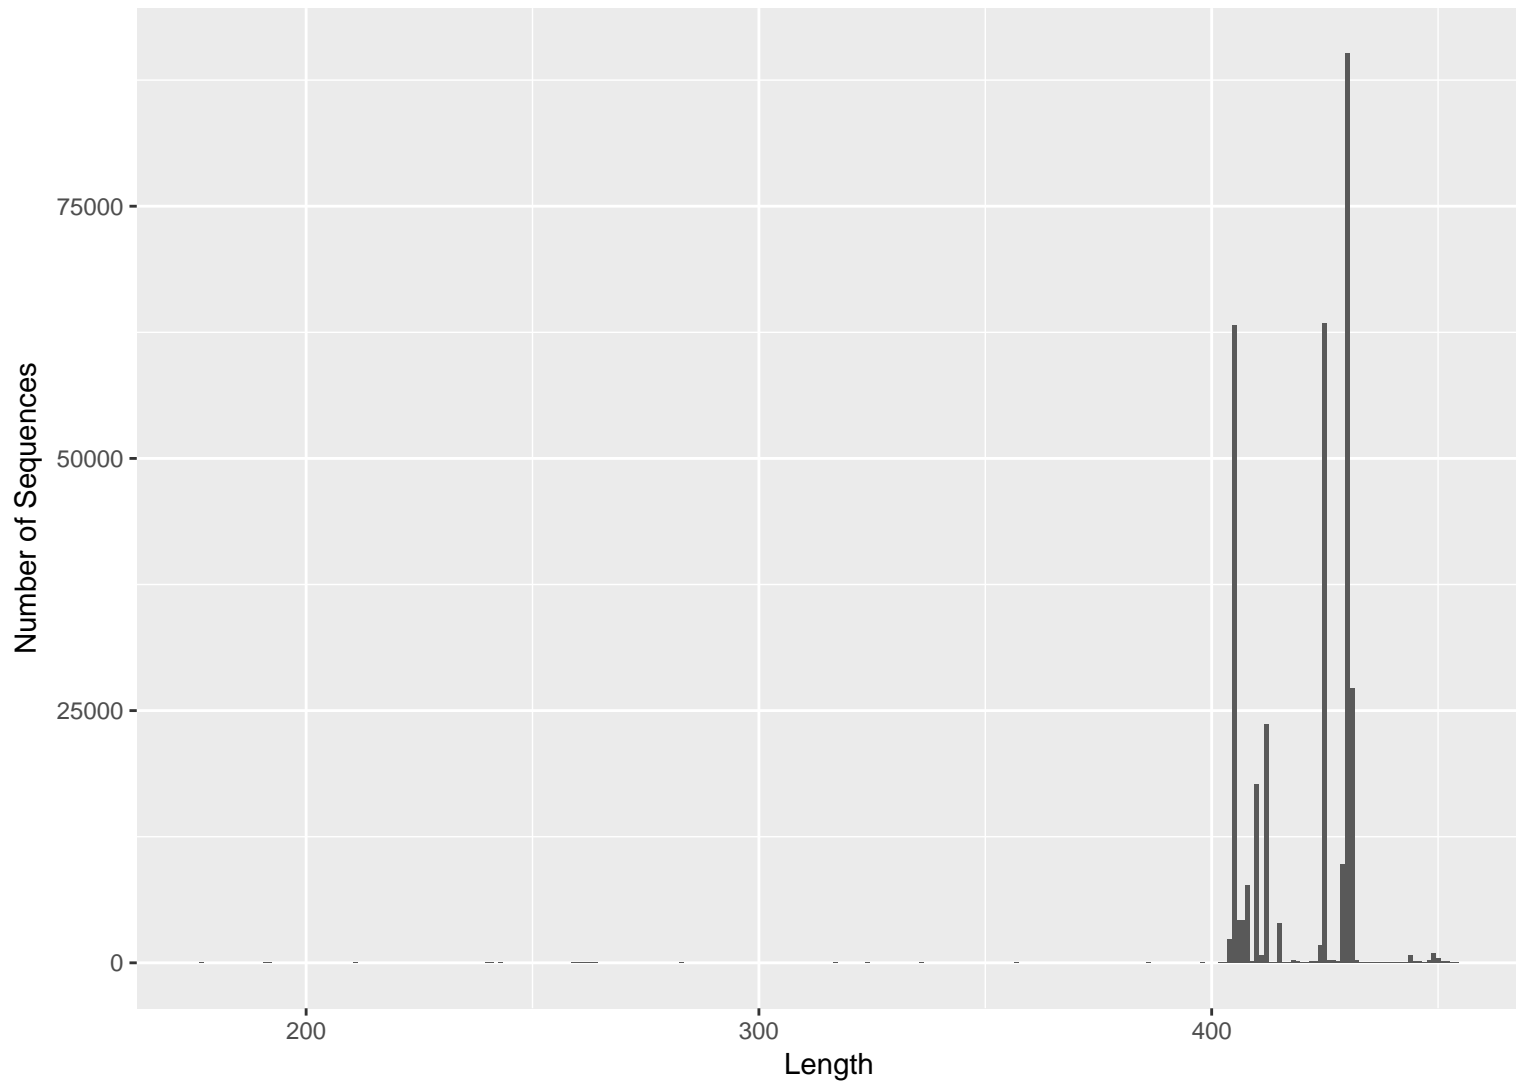

Supplement: Supplemental_File.zip [file Supplemental_File.zip]

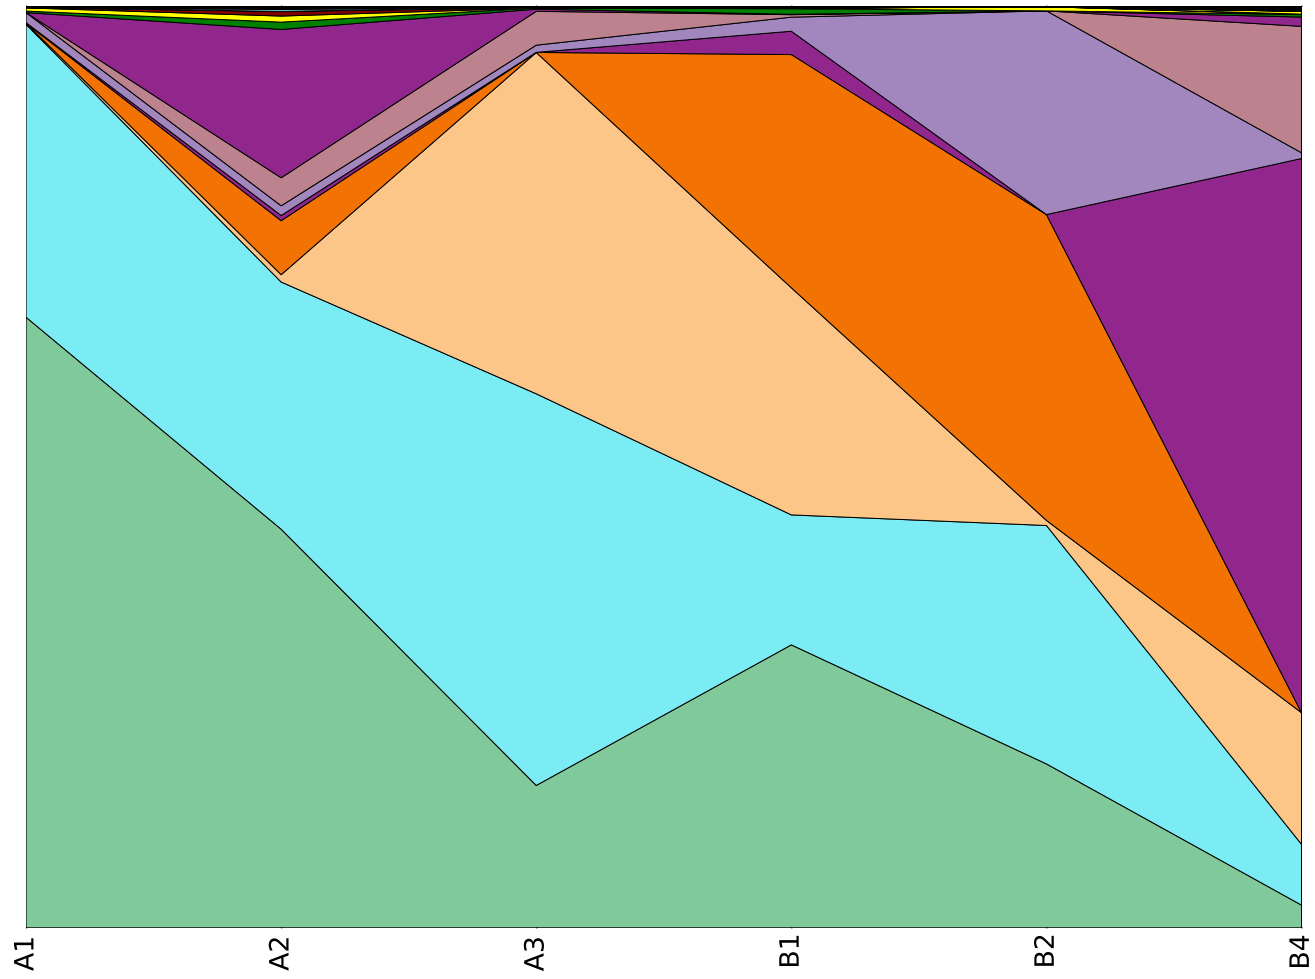

Supplement: Supplemental_File.zip [file Supplemental_File.zip]

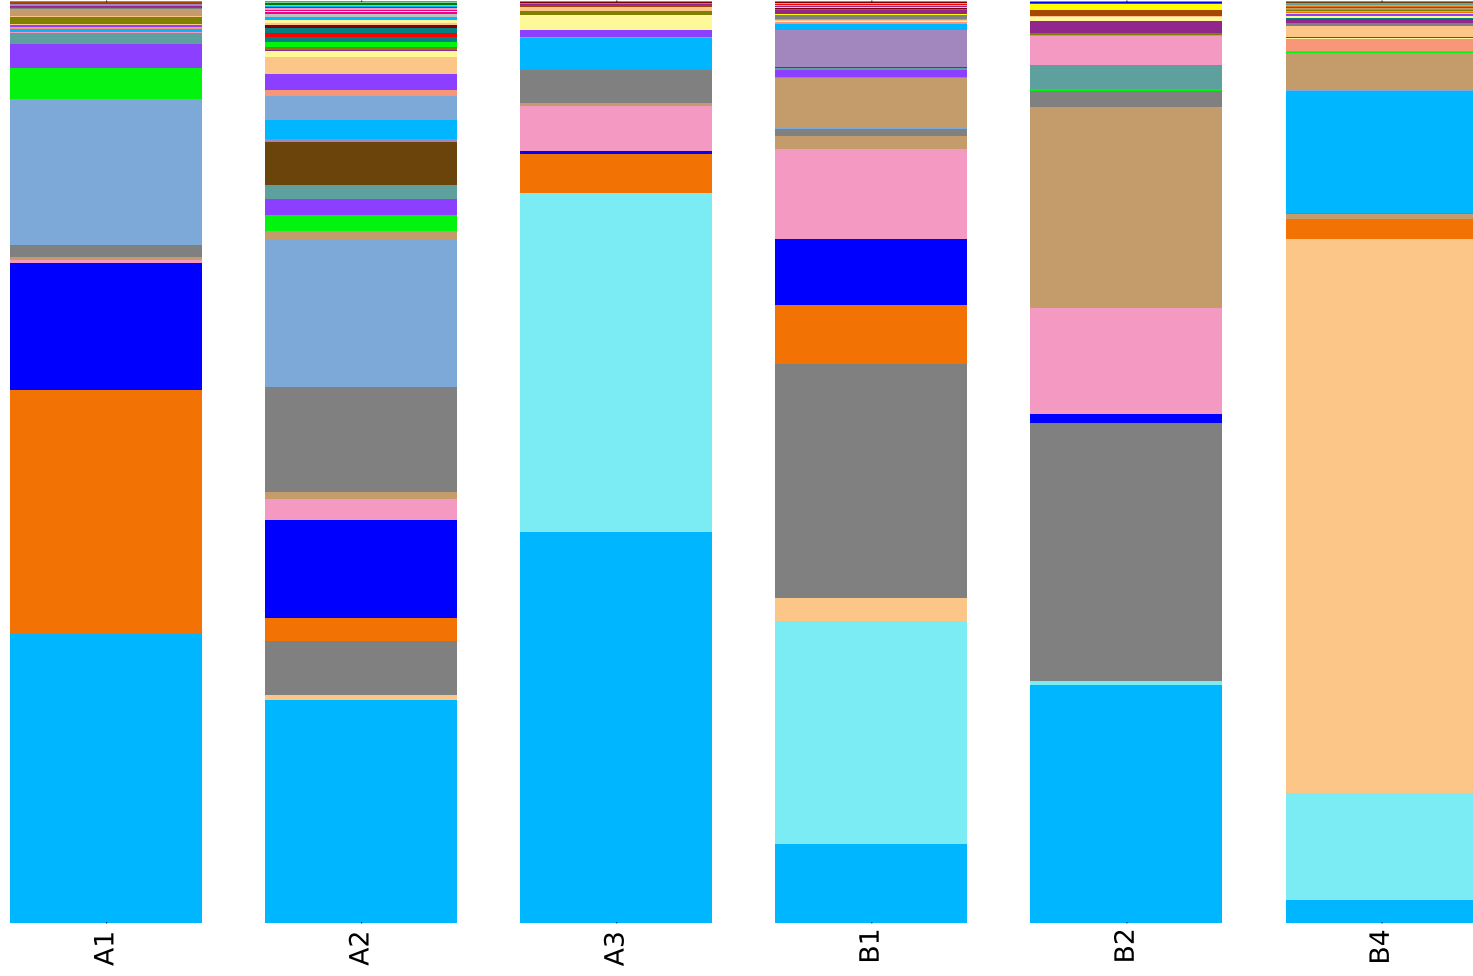

Supplement: Supplemental_File.zip [file Supplemental_File.zip]

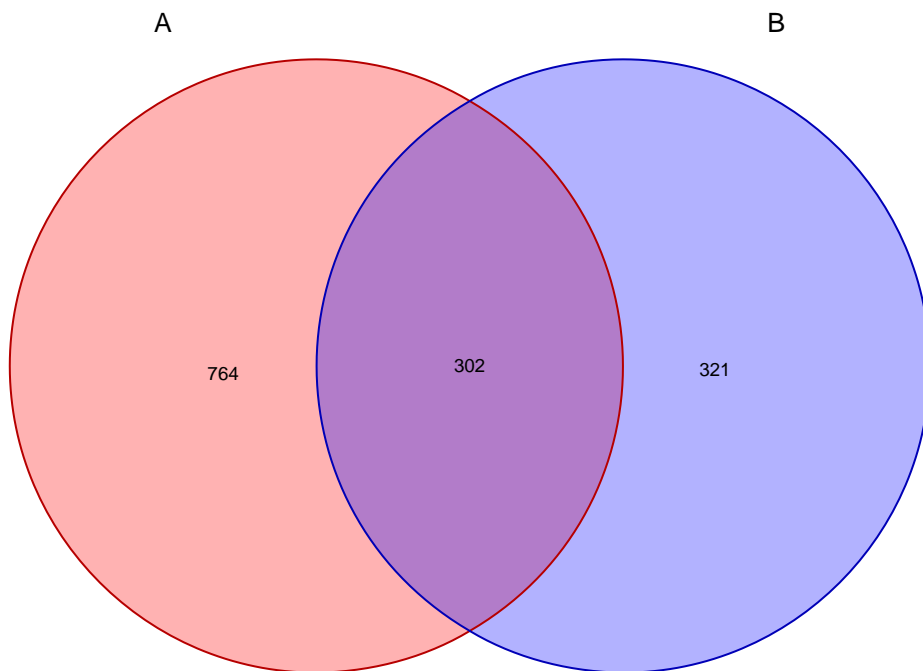

Supplement: Supplemental_File.zip [file Supplemental_File.zip]

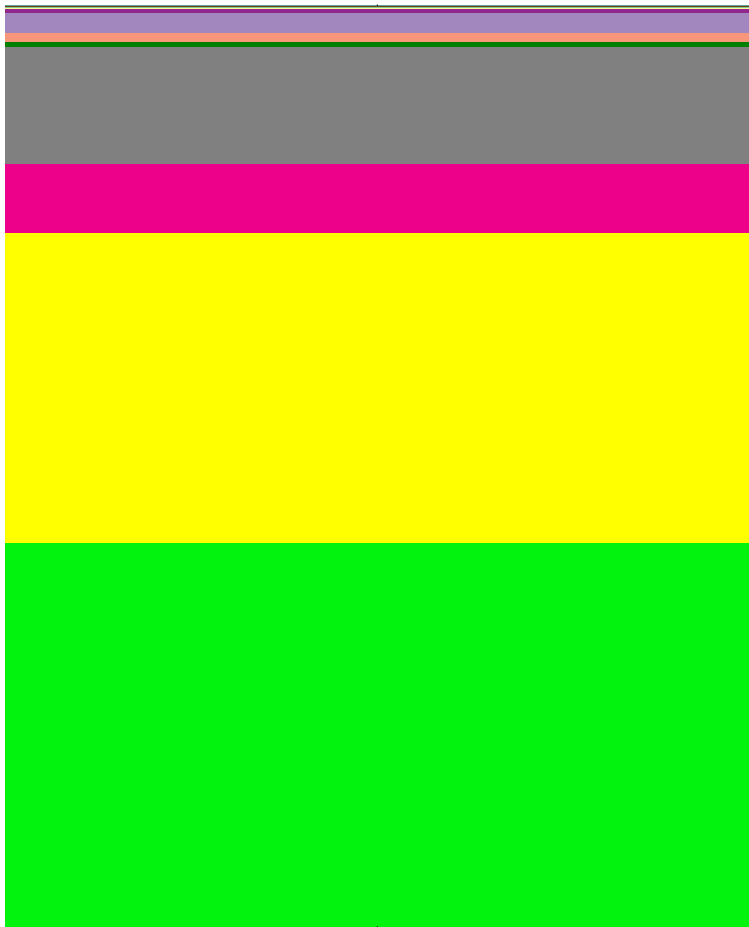

A

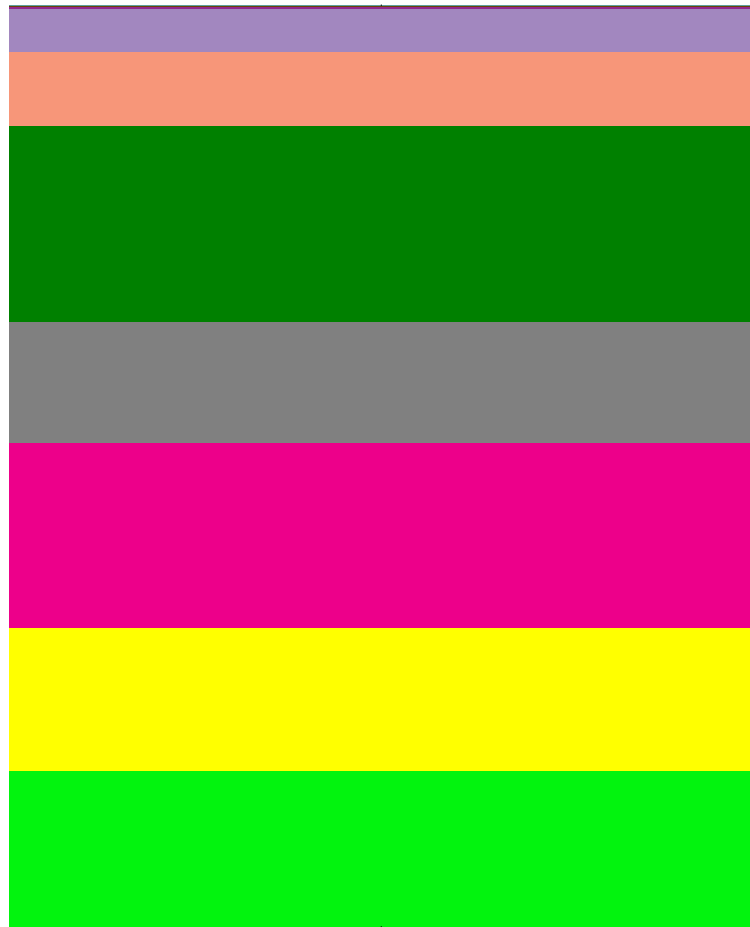

B

Supplement: Supplemental_File.zip [file Supplemental_File.zip]

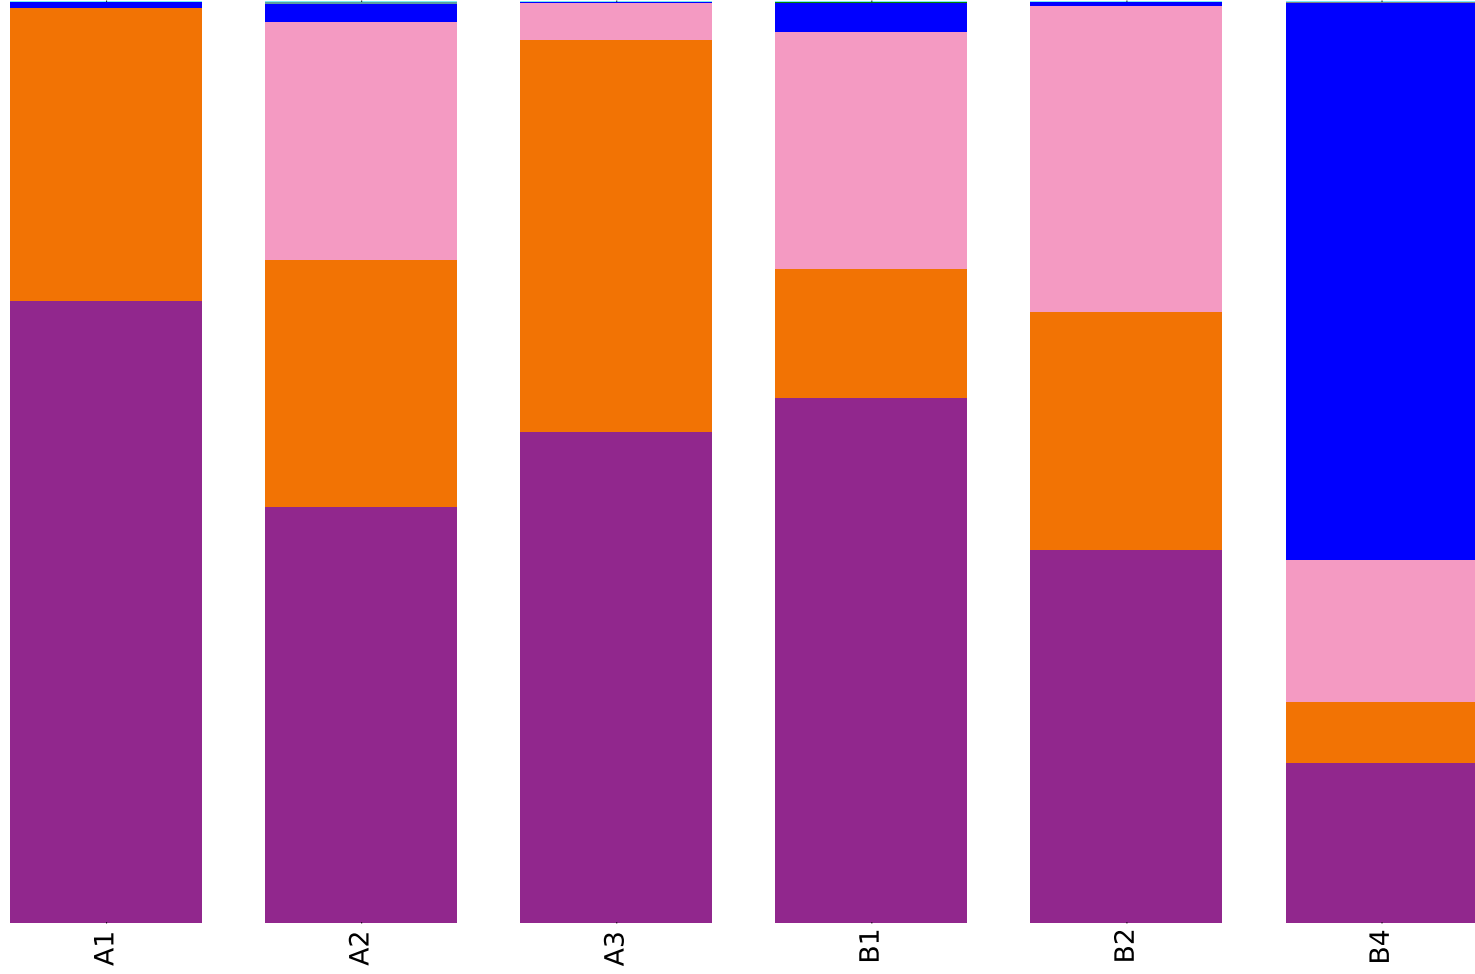

Supplement: Supplemental_File.zip [file Supplemental_File.zip]

A

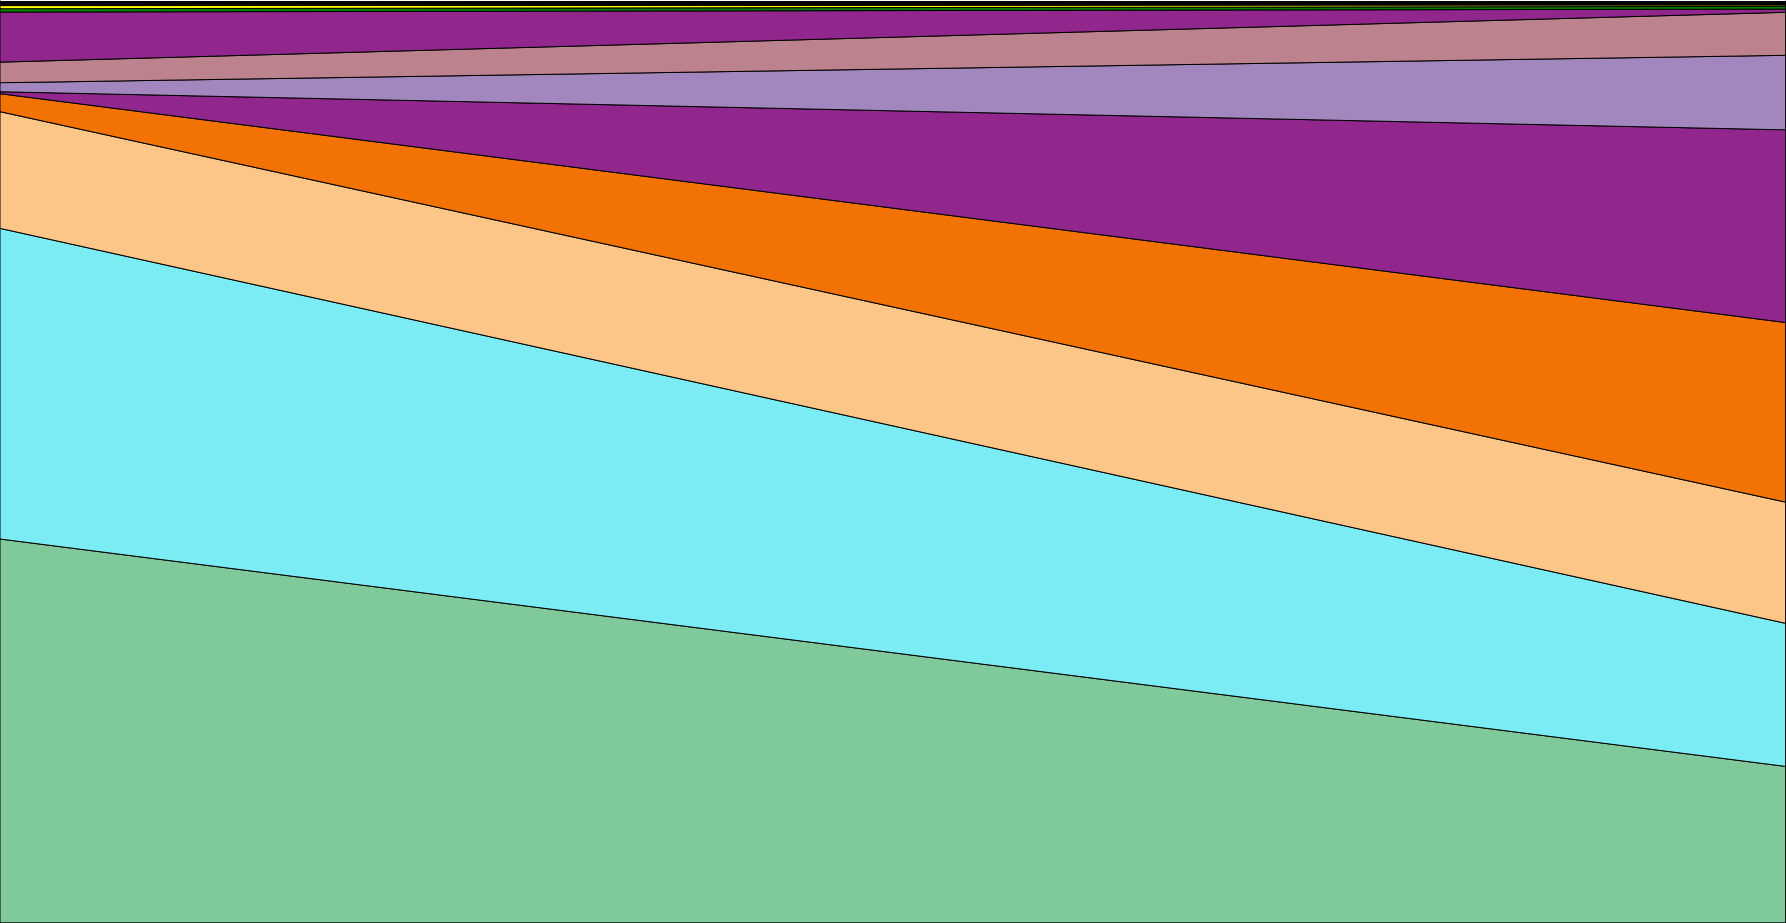

B

Supplement: Supplemental_File.zip [file Supplemental_File.zip]

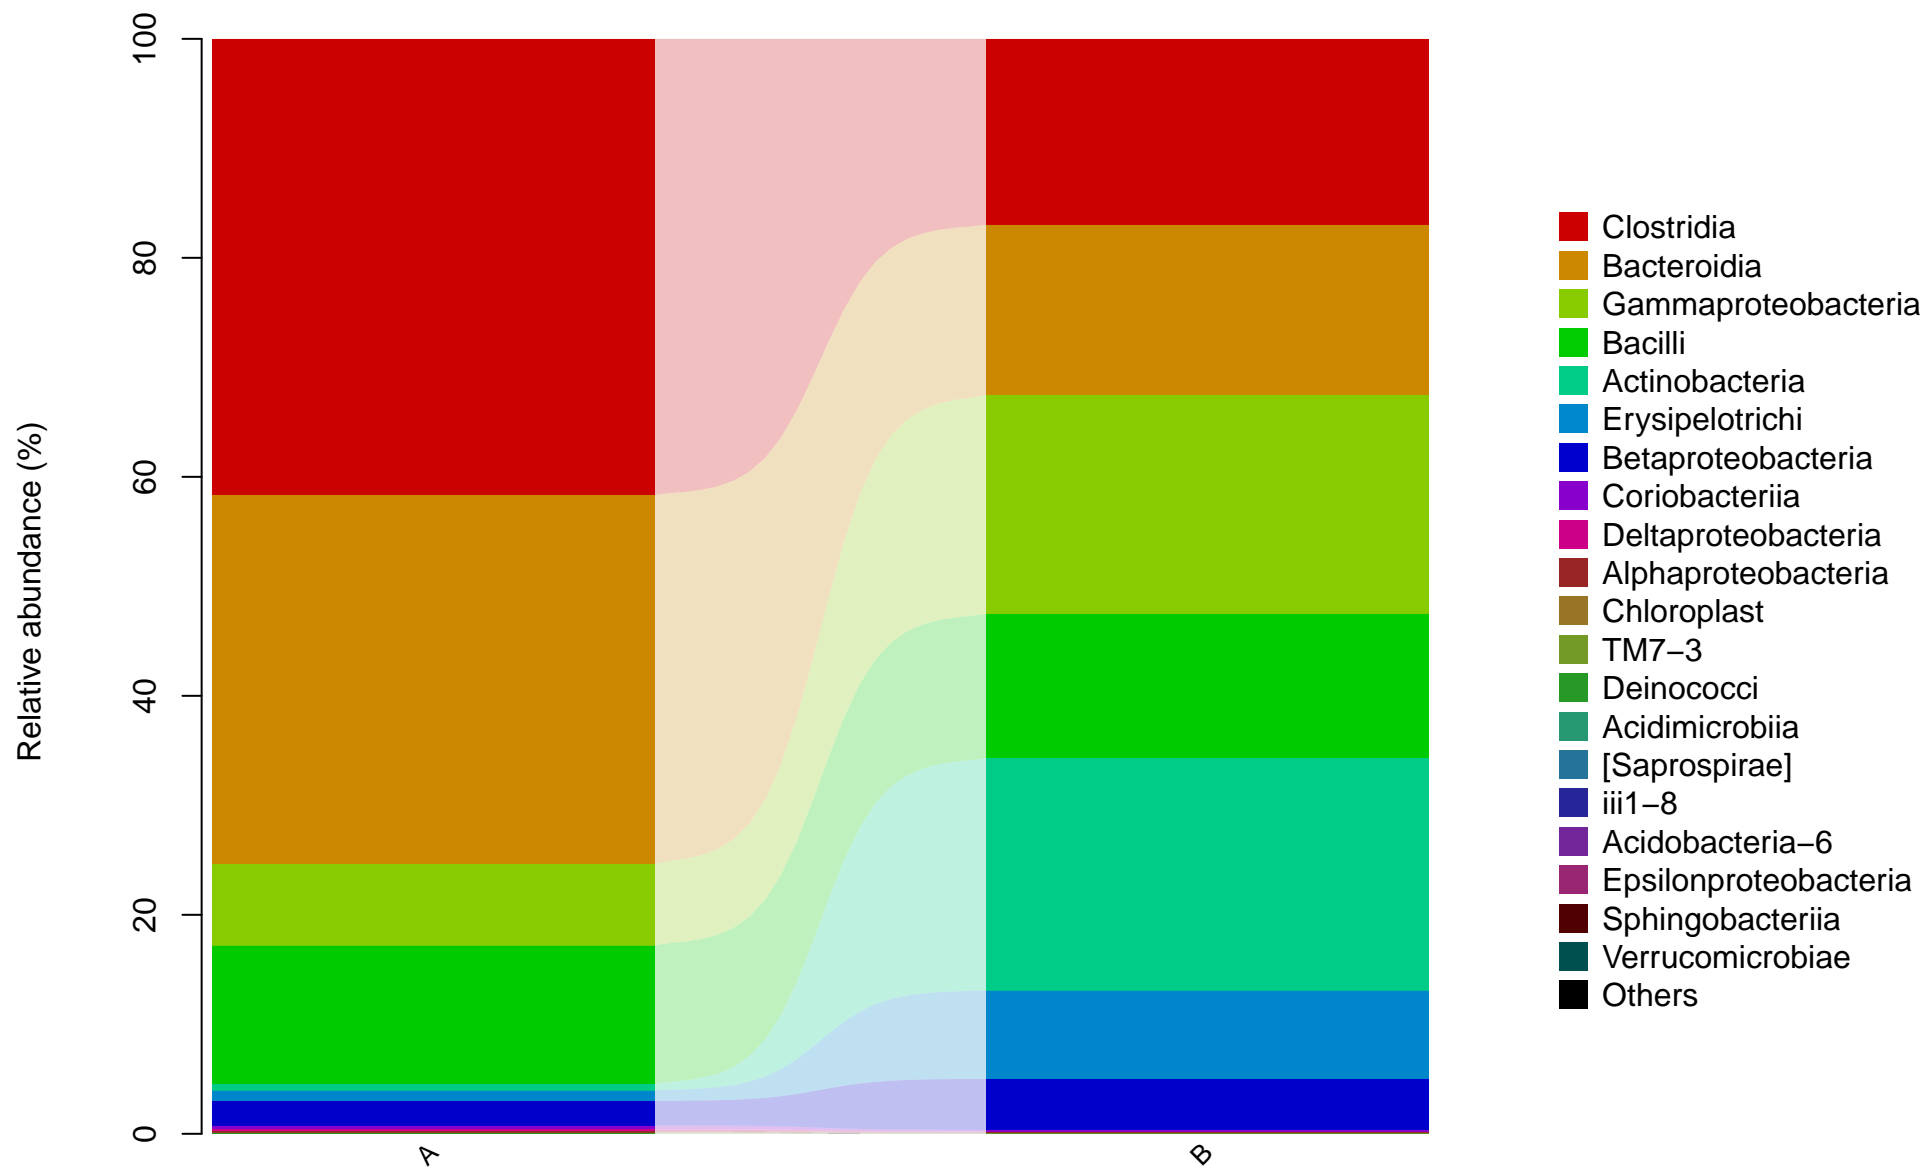

Supplement: Supplemental_File.zip [file Supplemental_File.zip]

Dorea

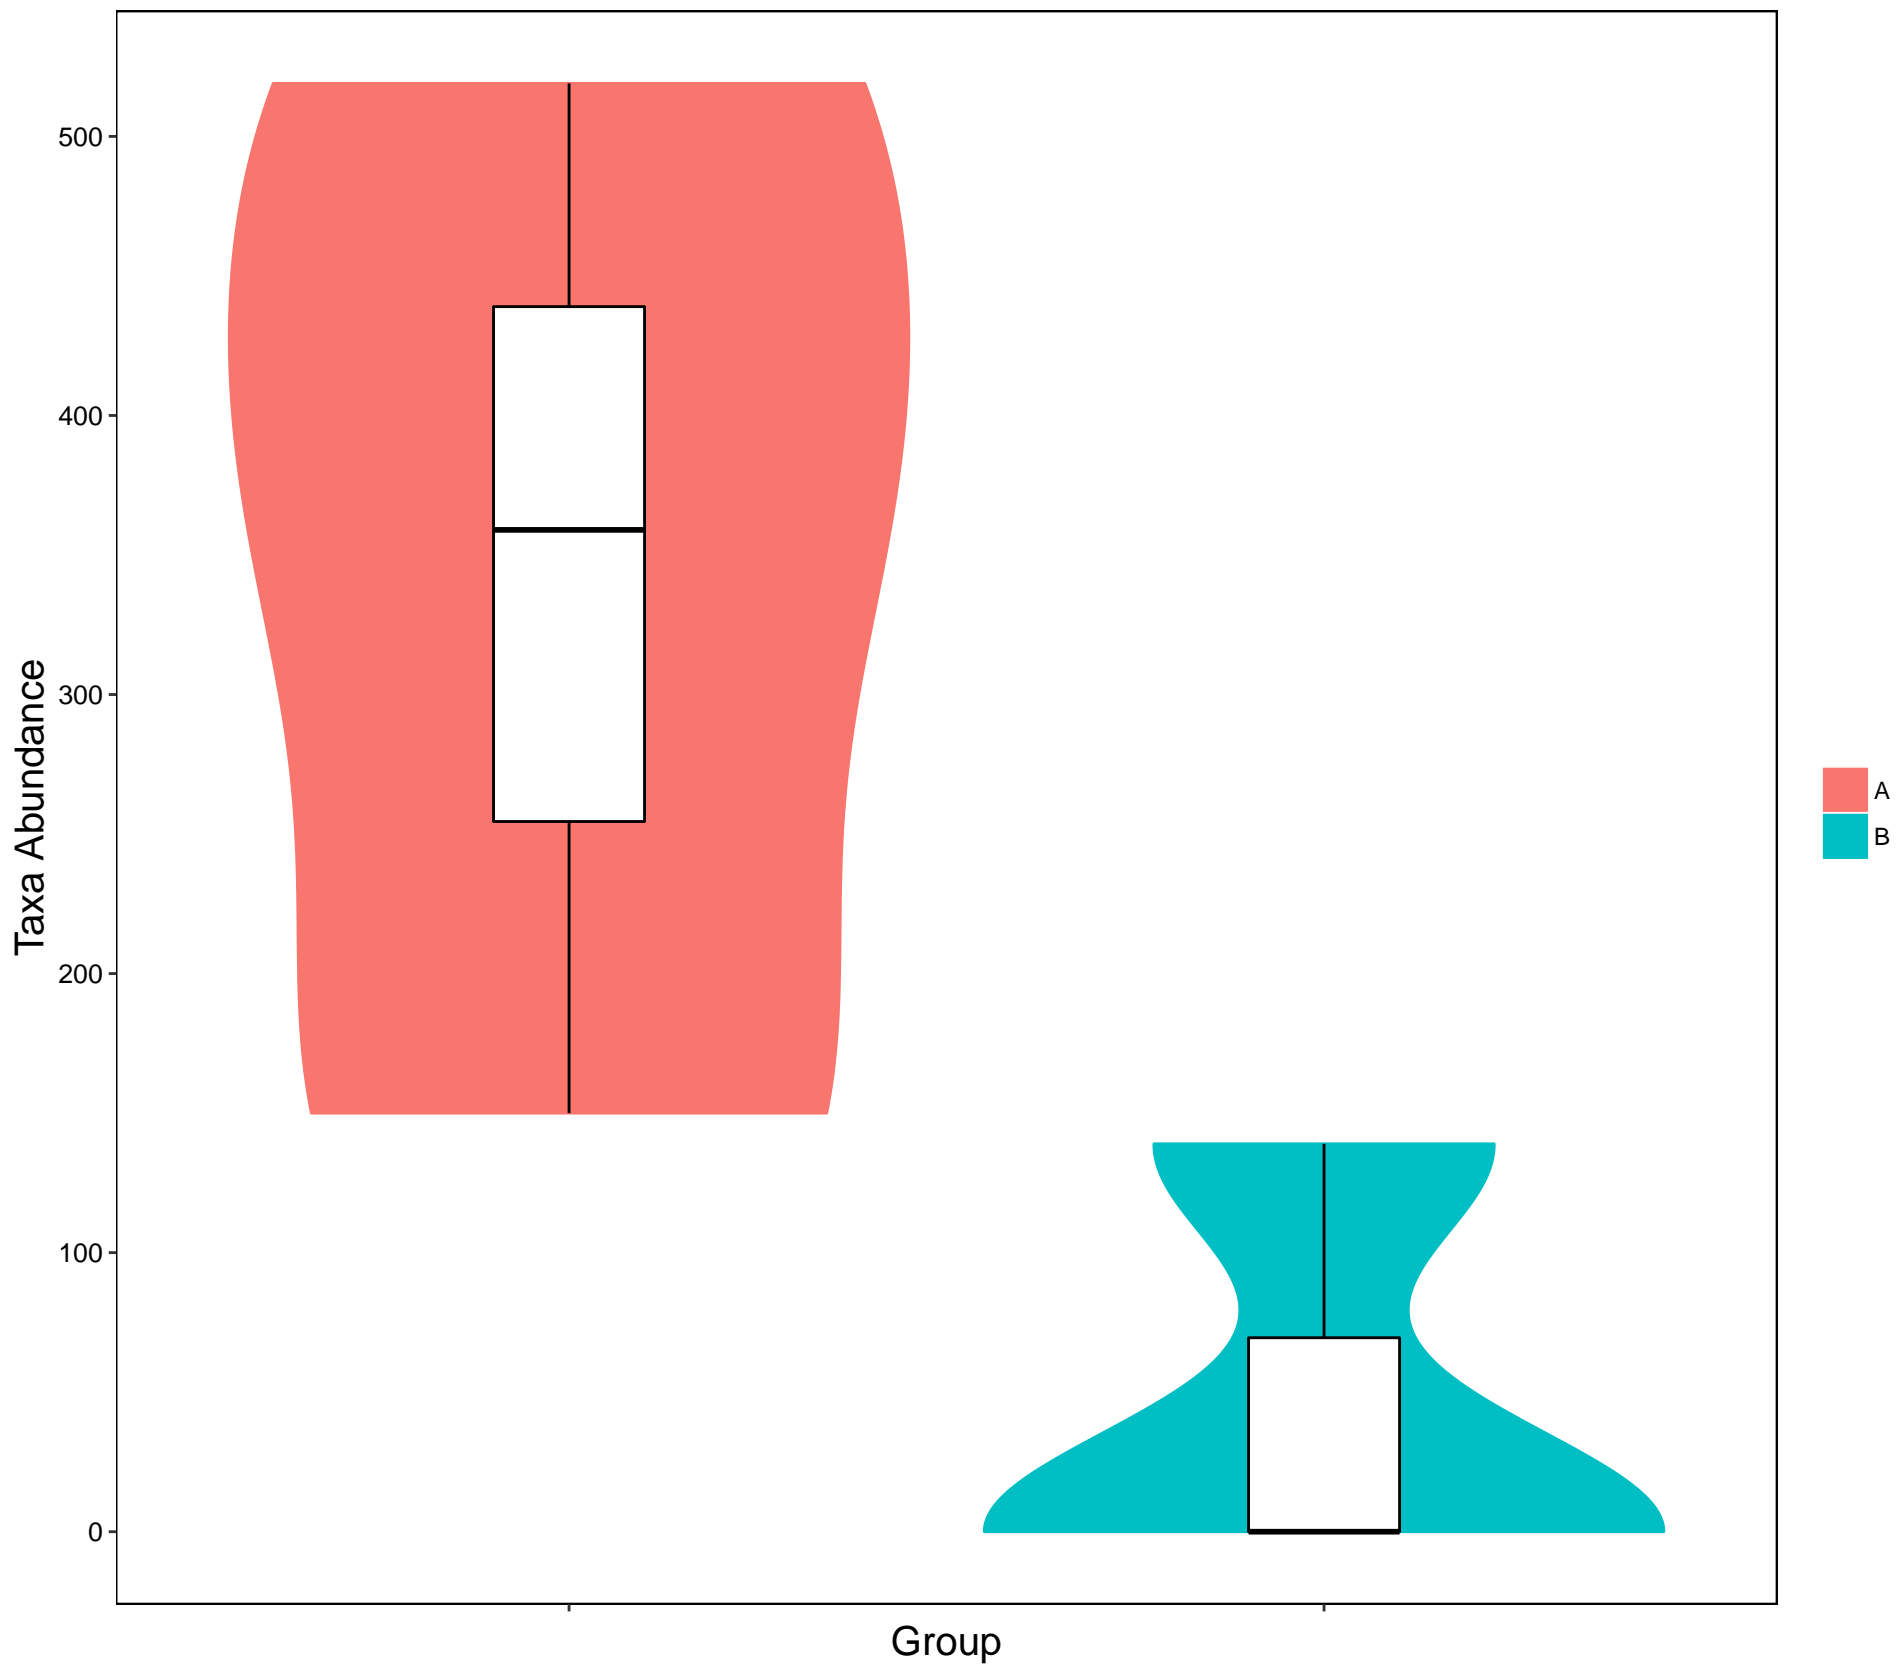

Supplement: Supplemental_File.zip [file Supplemental_File.zip]

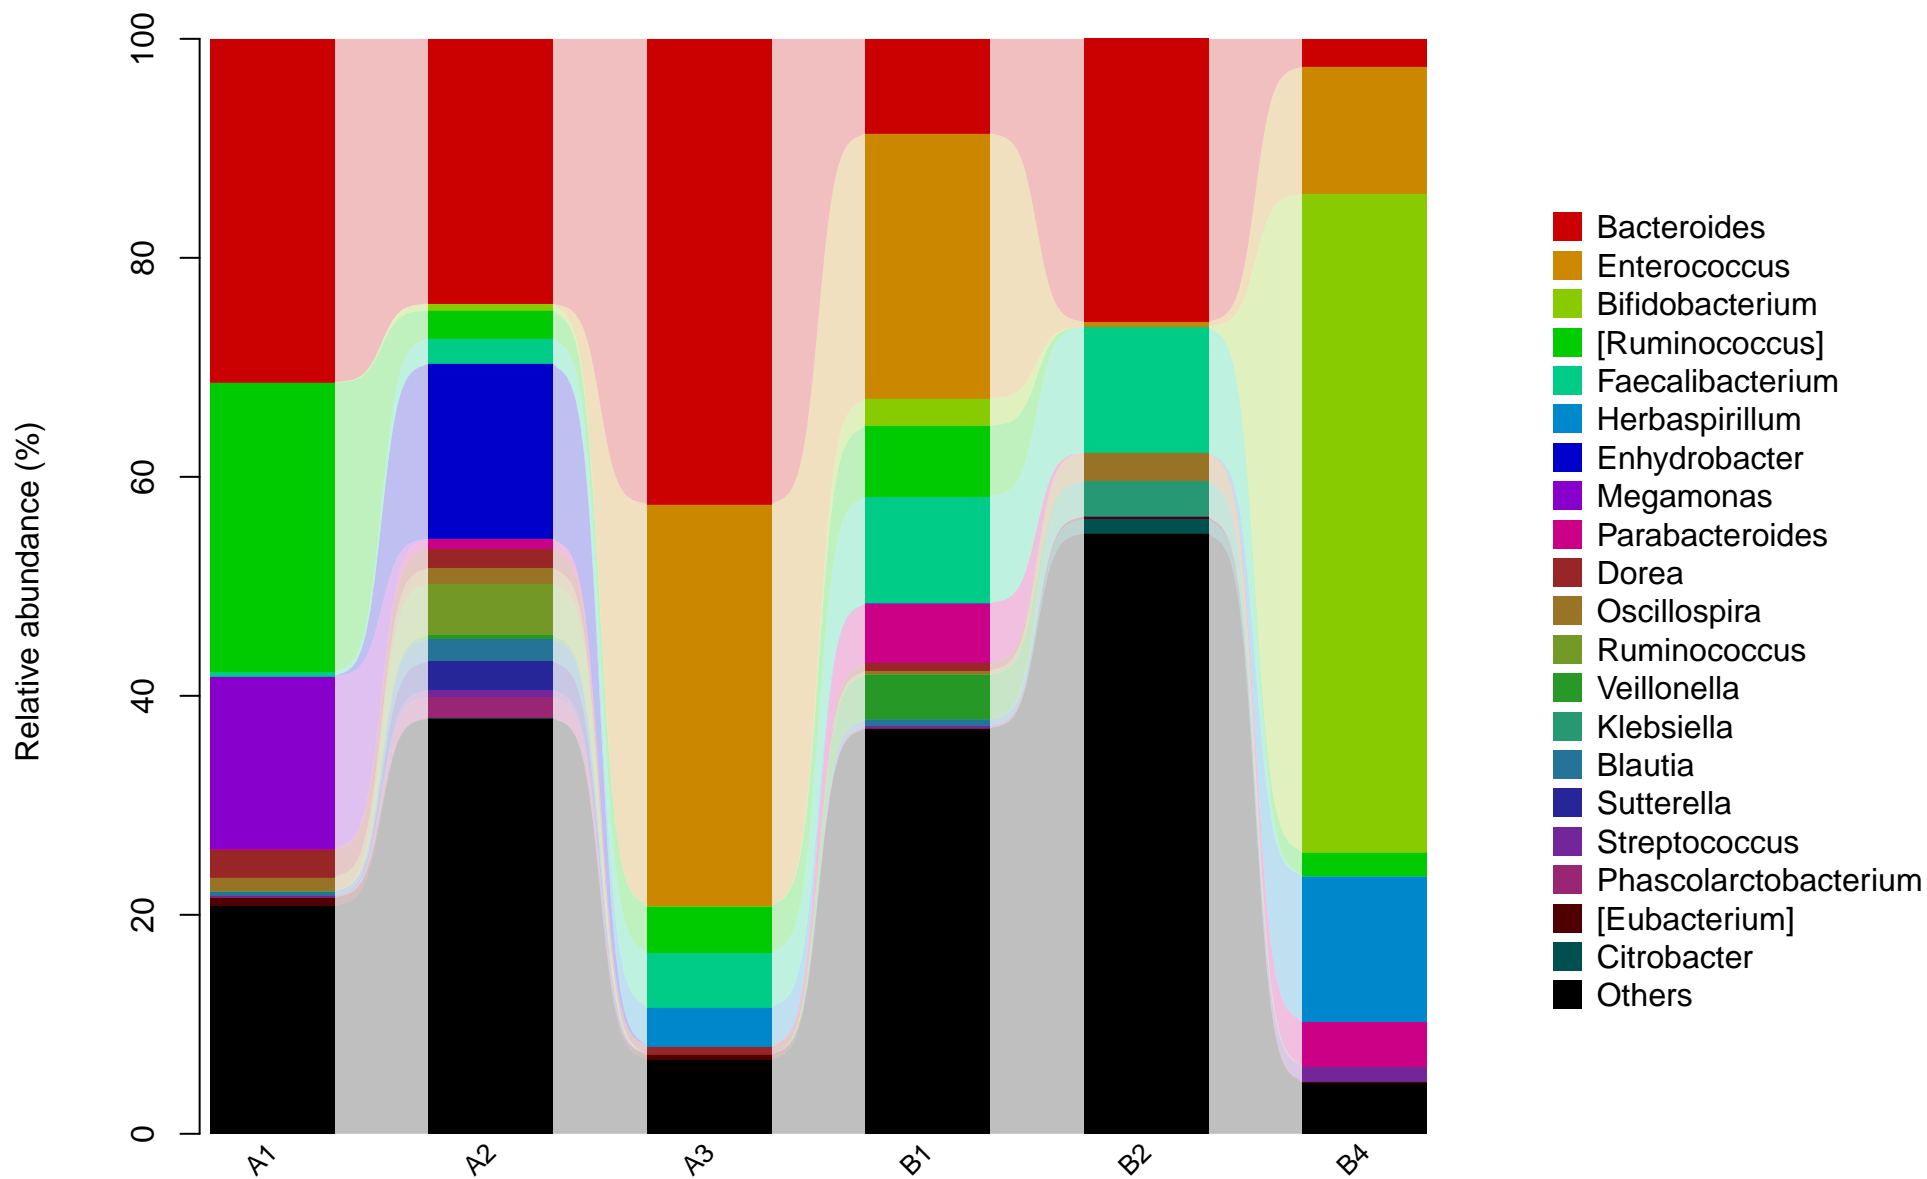

Supplement: Supplemental_File.zip [file Supplemental_File.zip]

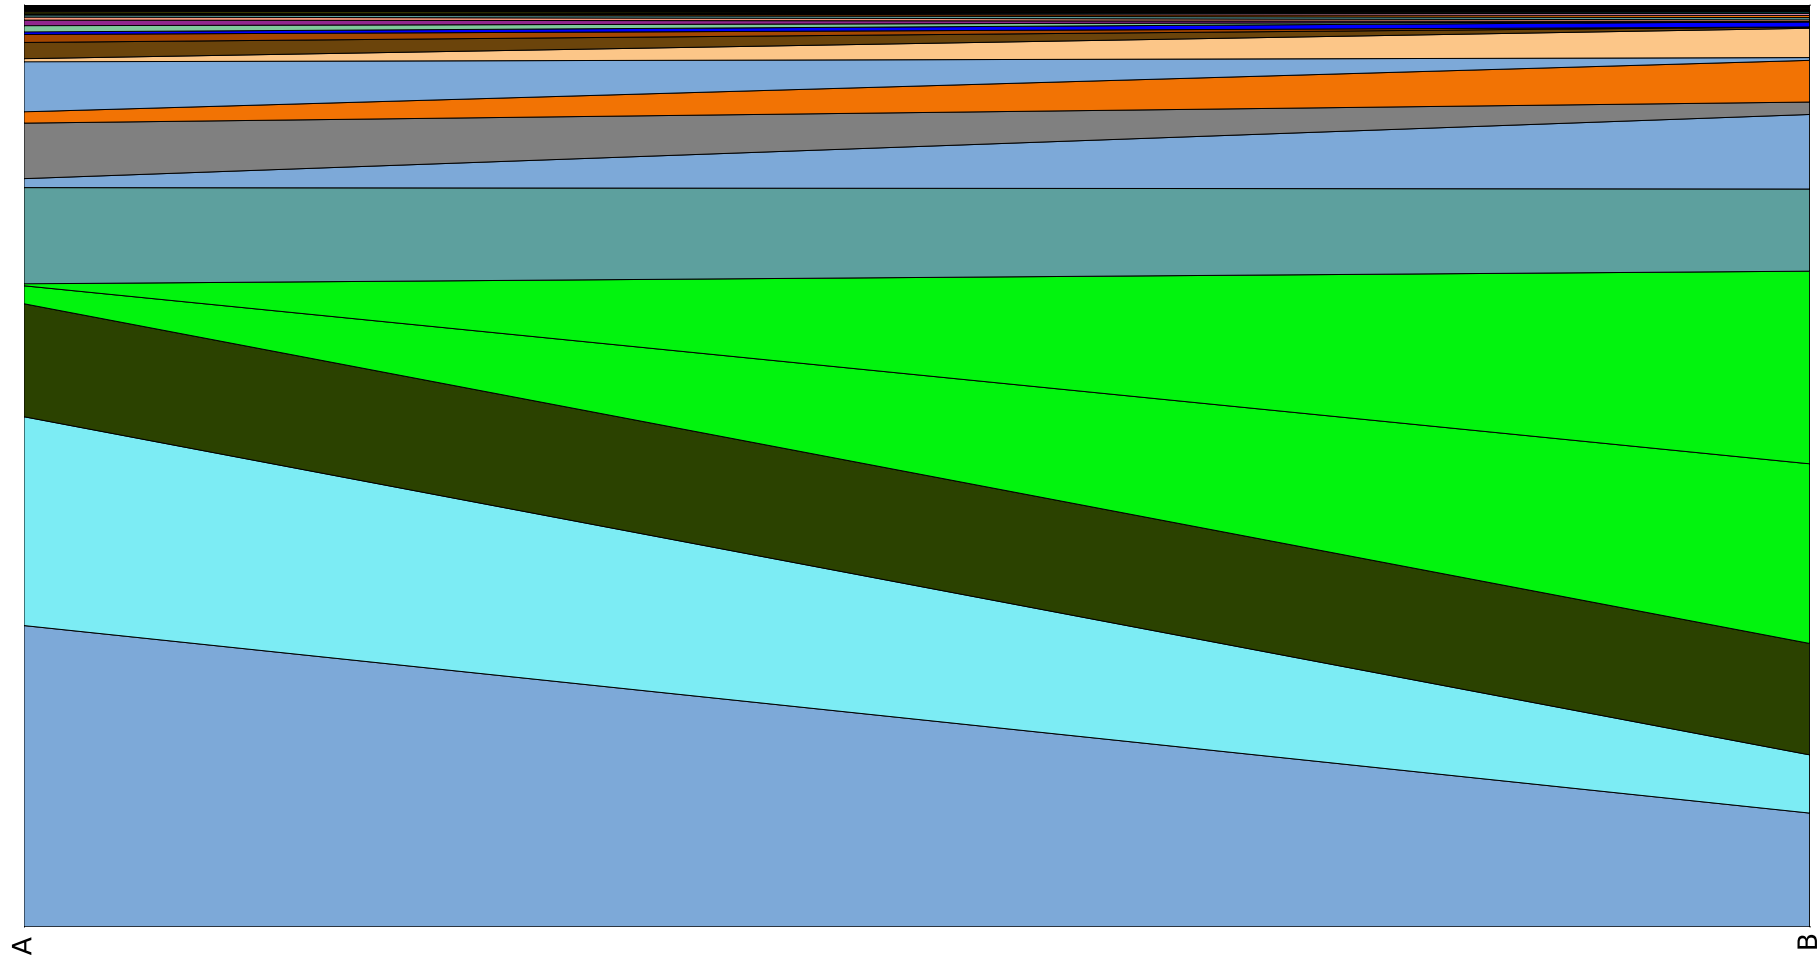

Supplement: Supplemental_File.zip [file Supplemental_File.zip]

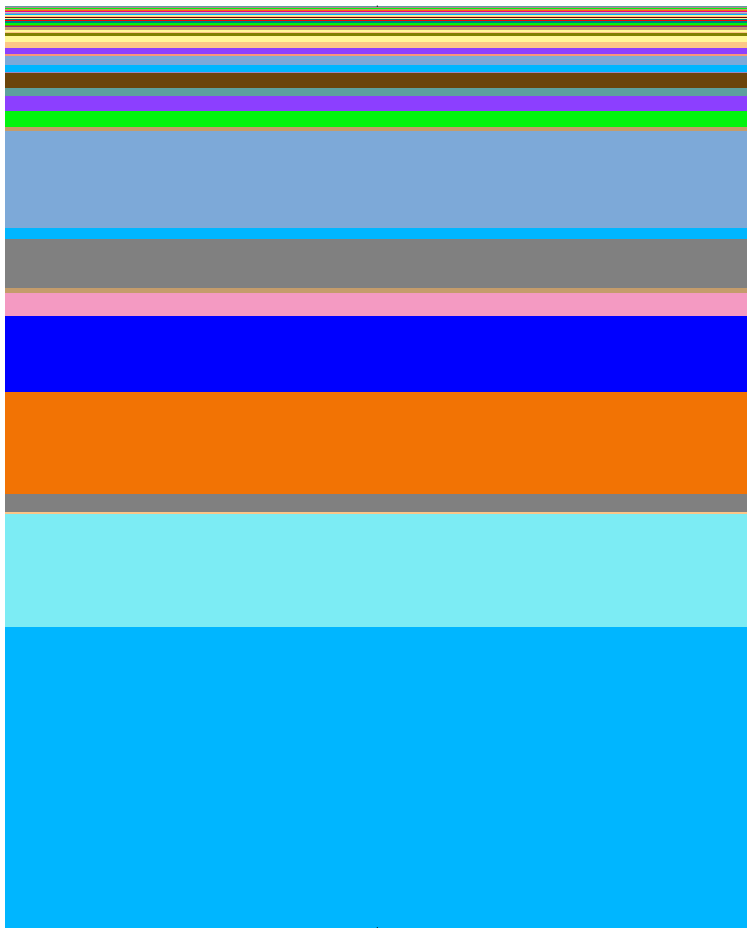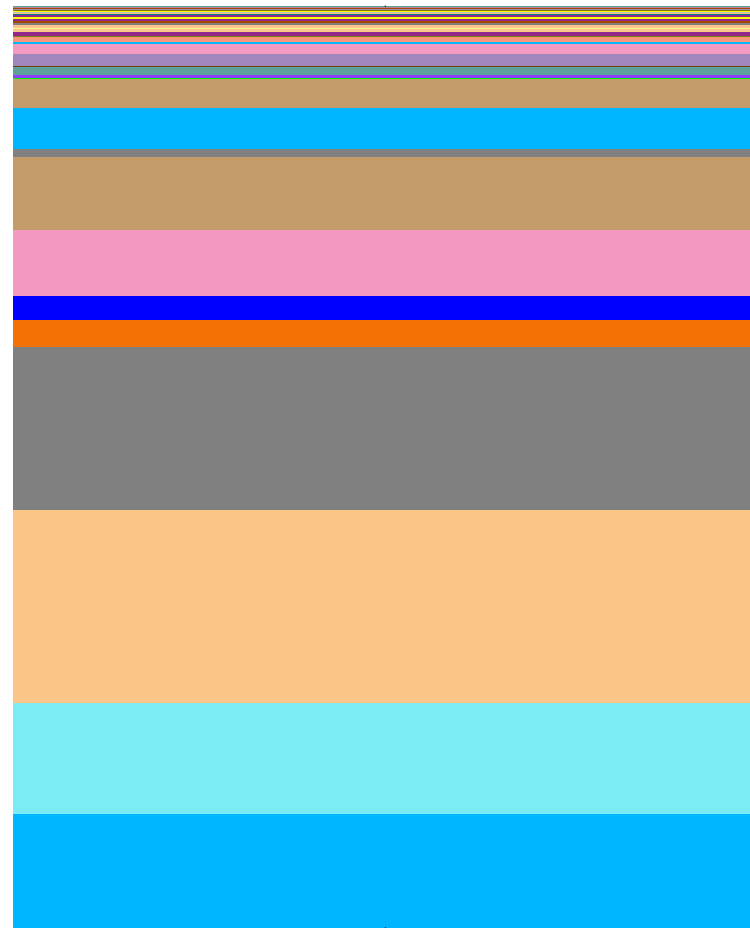

Supplement: Supplemental_File.zip [file Supplemental_File.zip]

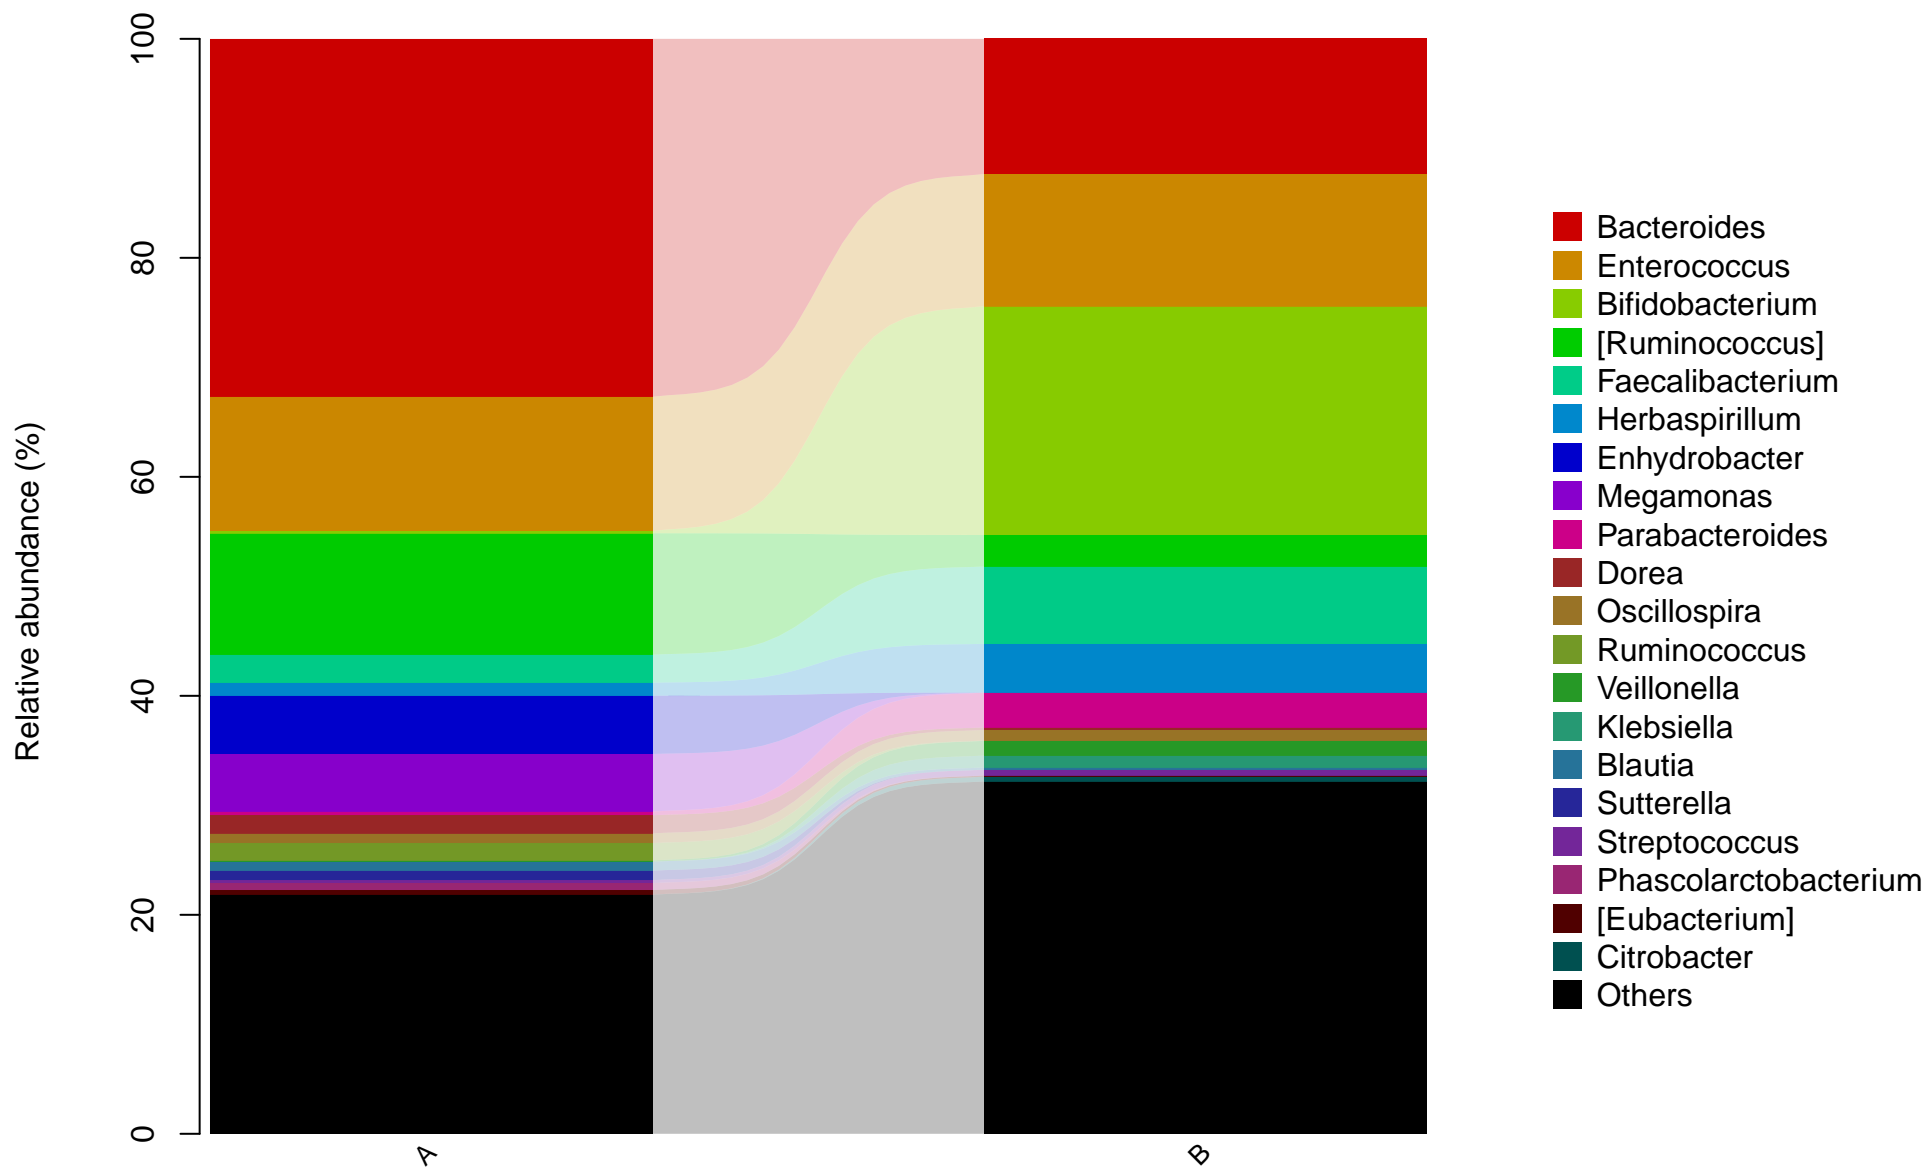

Supplement: Supplemental_File.zip [file Supplemental_File.zip]

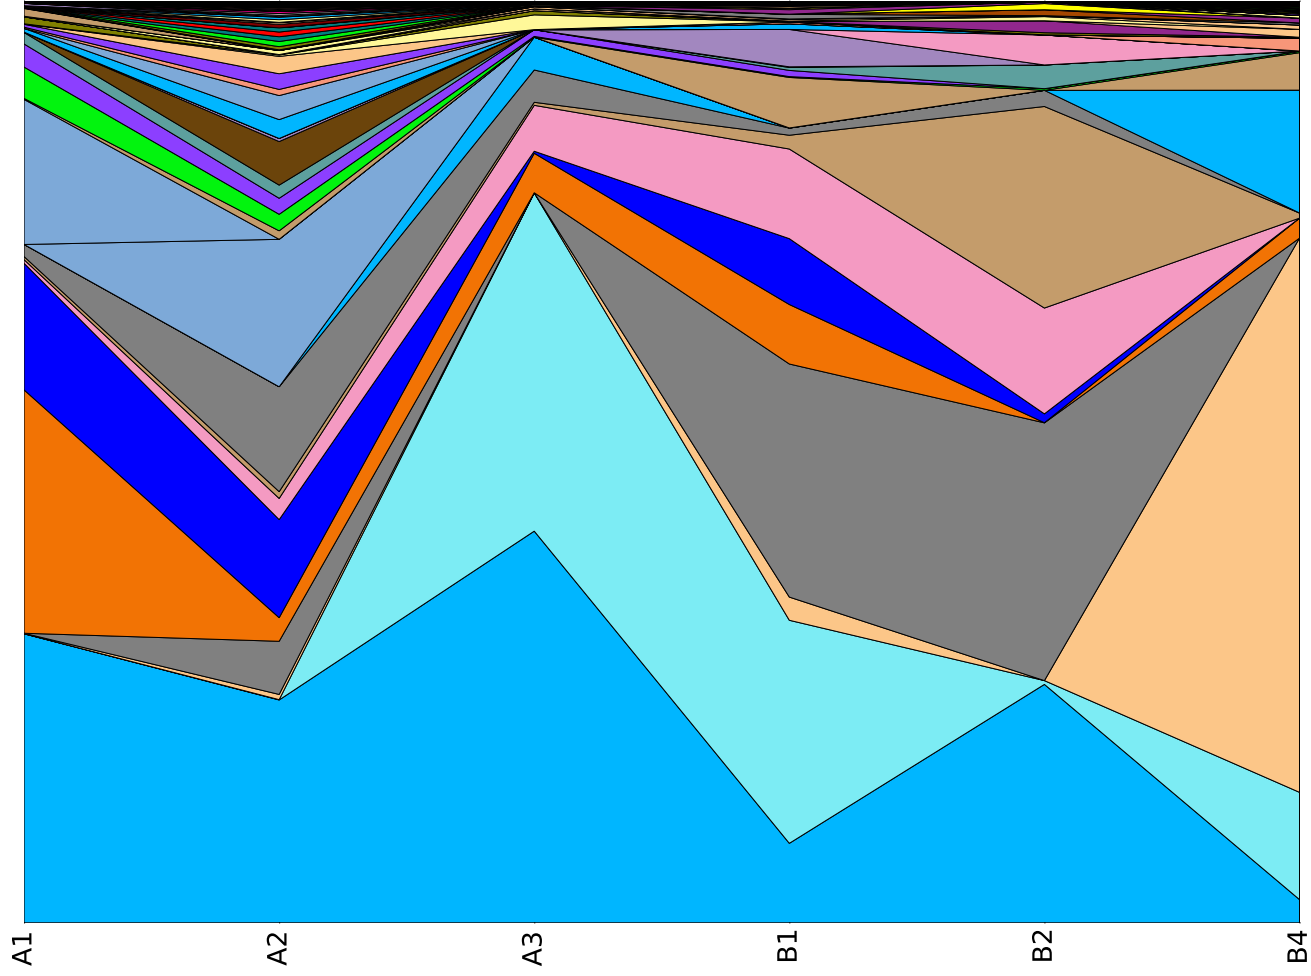

Supplement: Supplemental_File.zip [file Supplemental_File.zip]

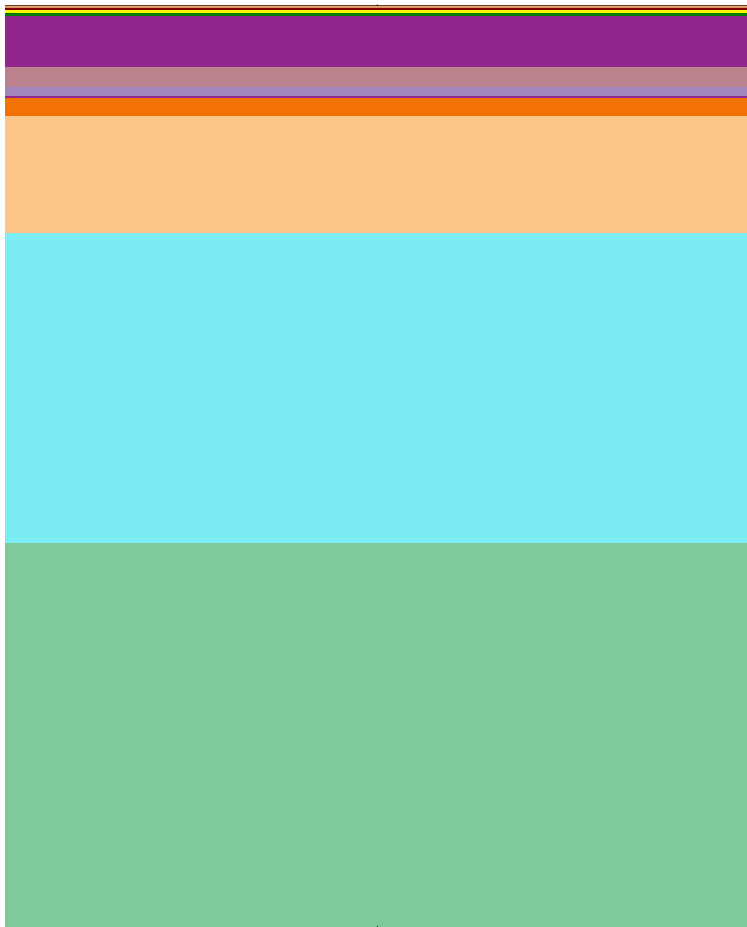

A

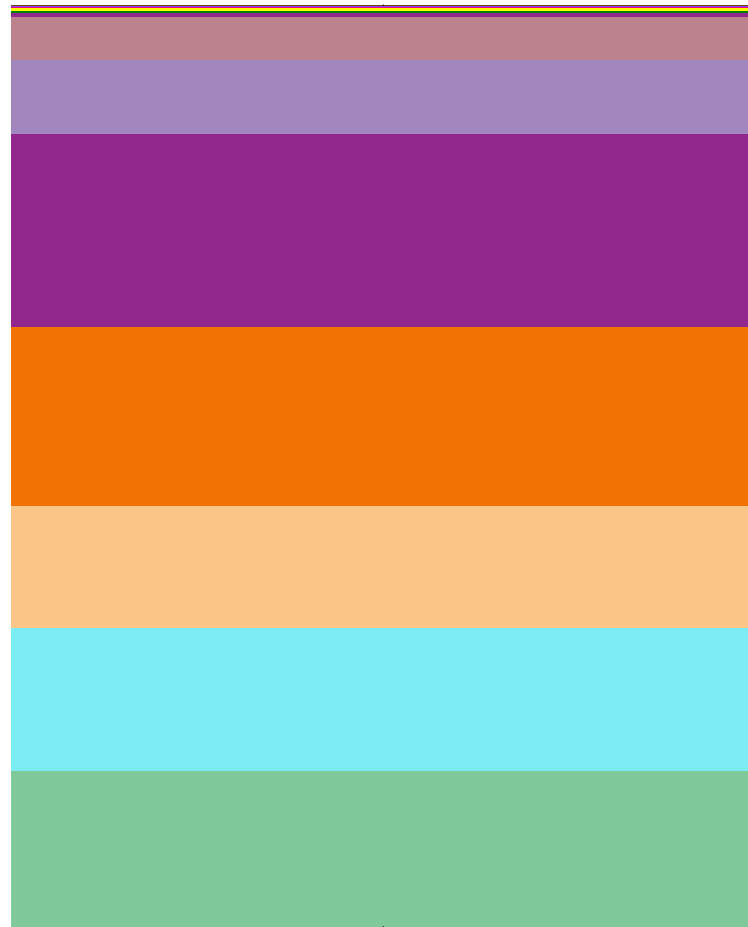

B

Supplement: Supplemental_File.zip [file Supplemental_File.zip]

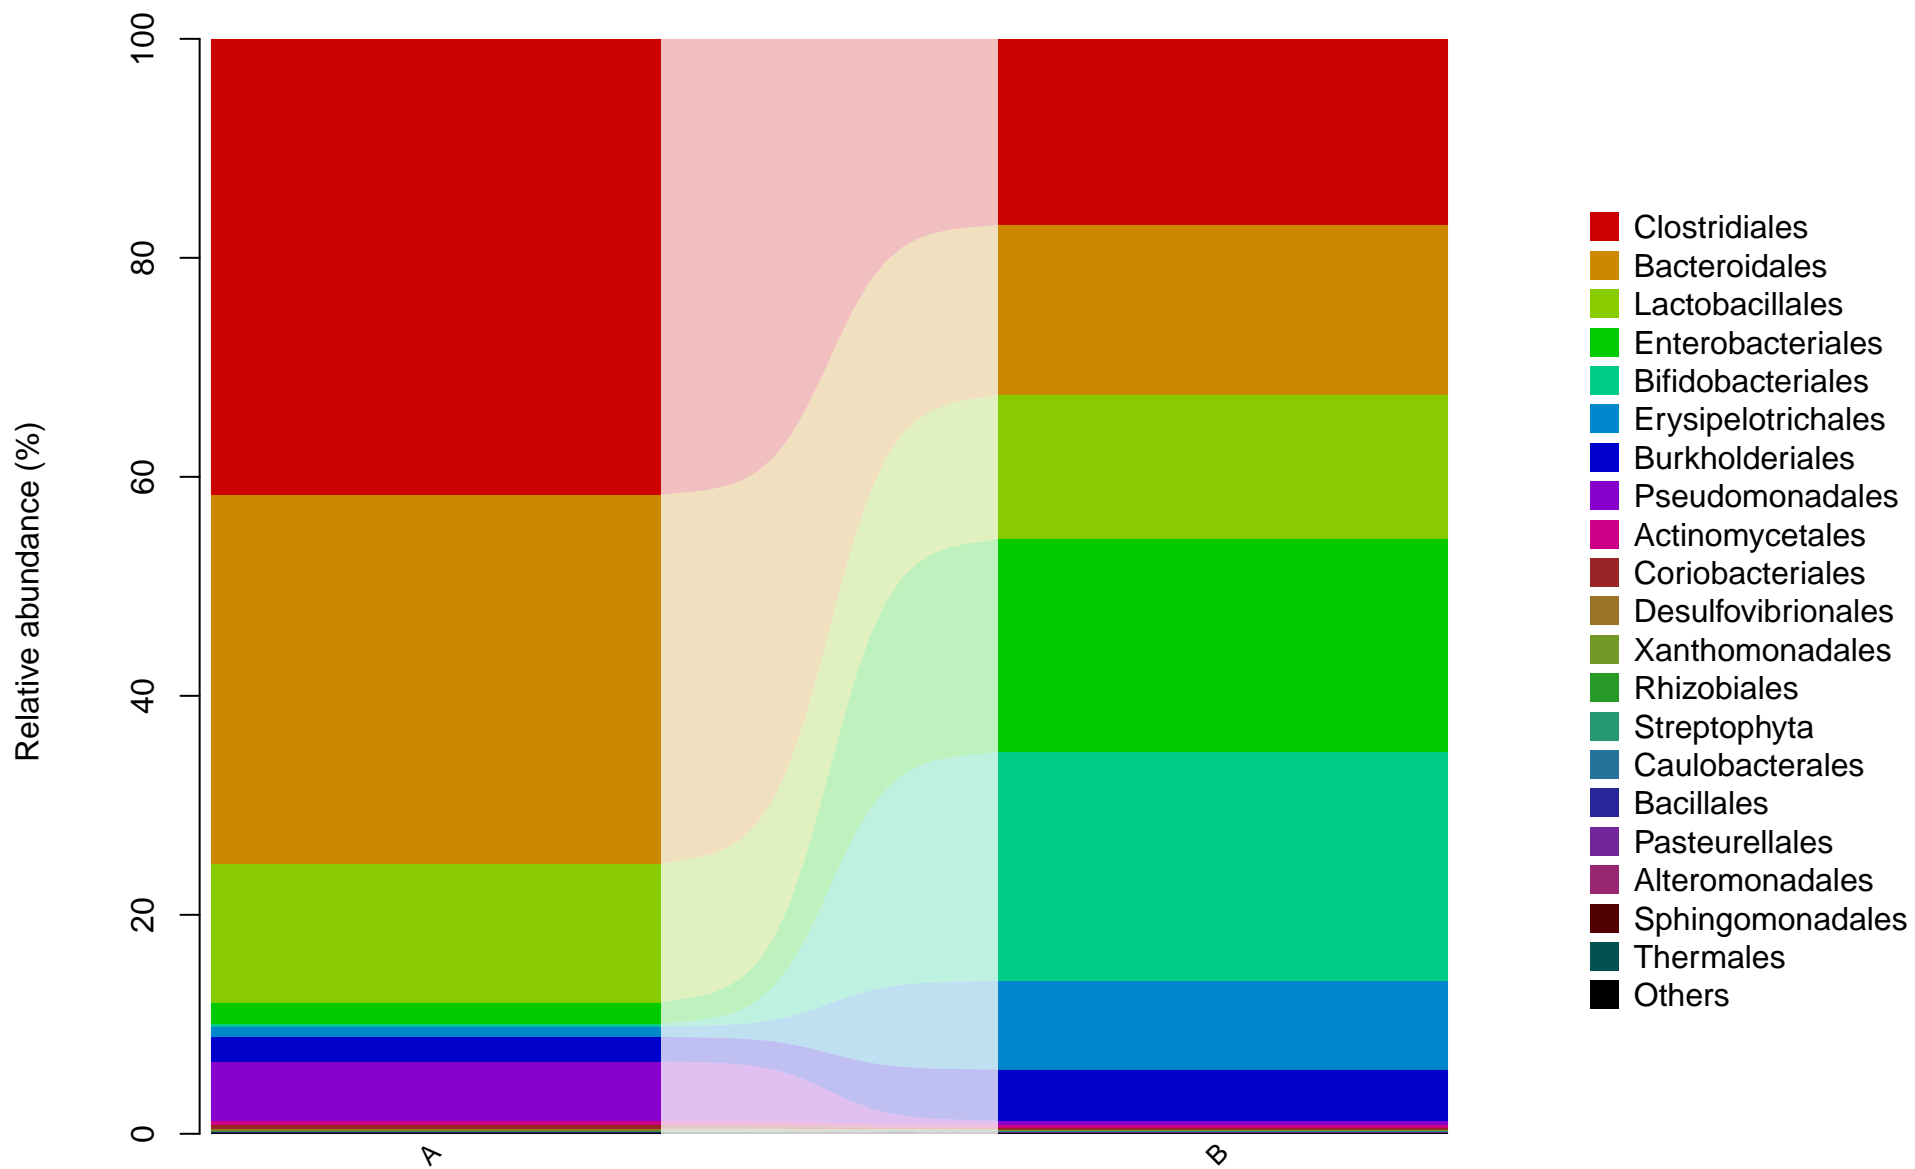

Supplement: Supplemental_File.zip [file Supplemental_File.zip]

# Bacteroidetes

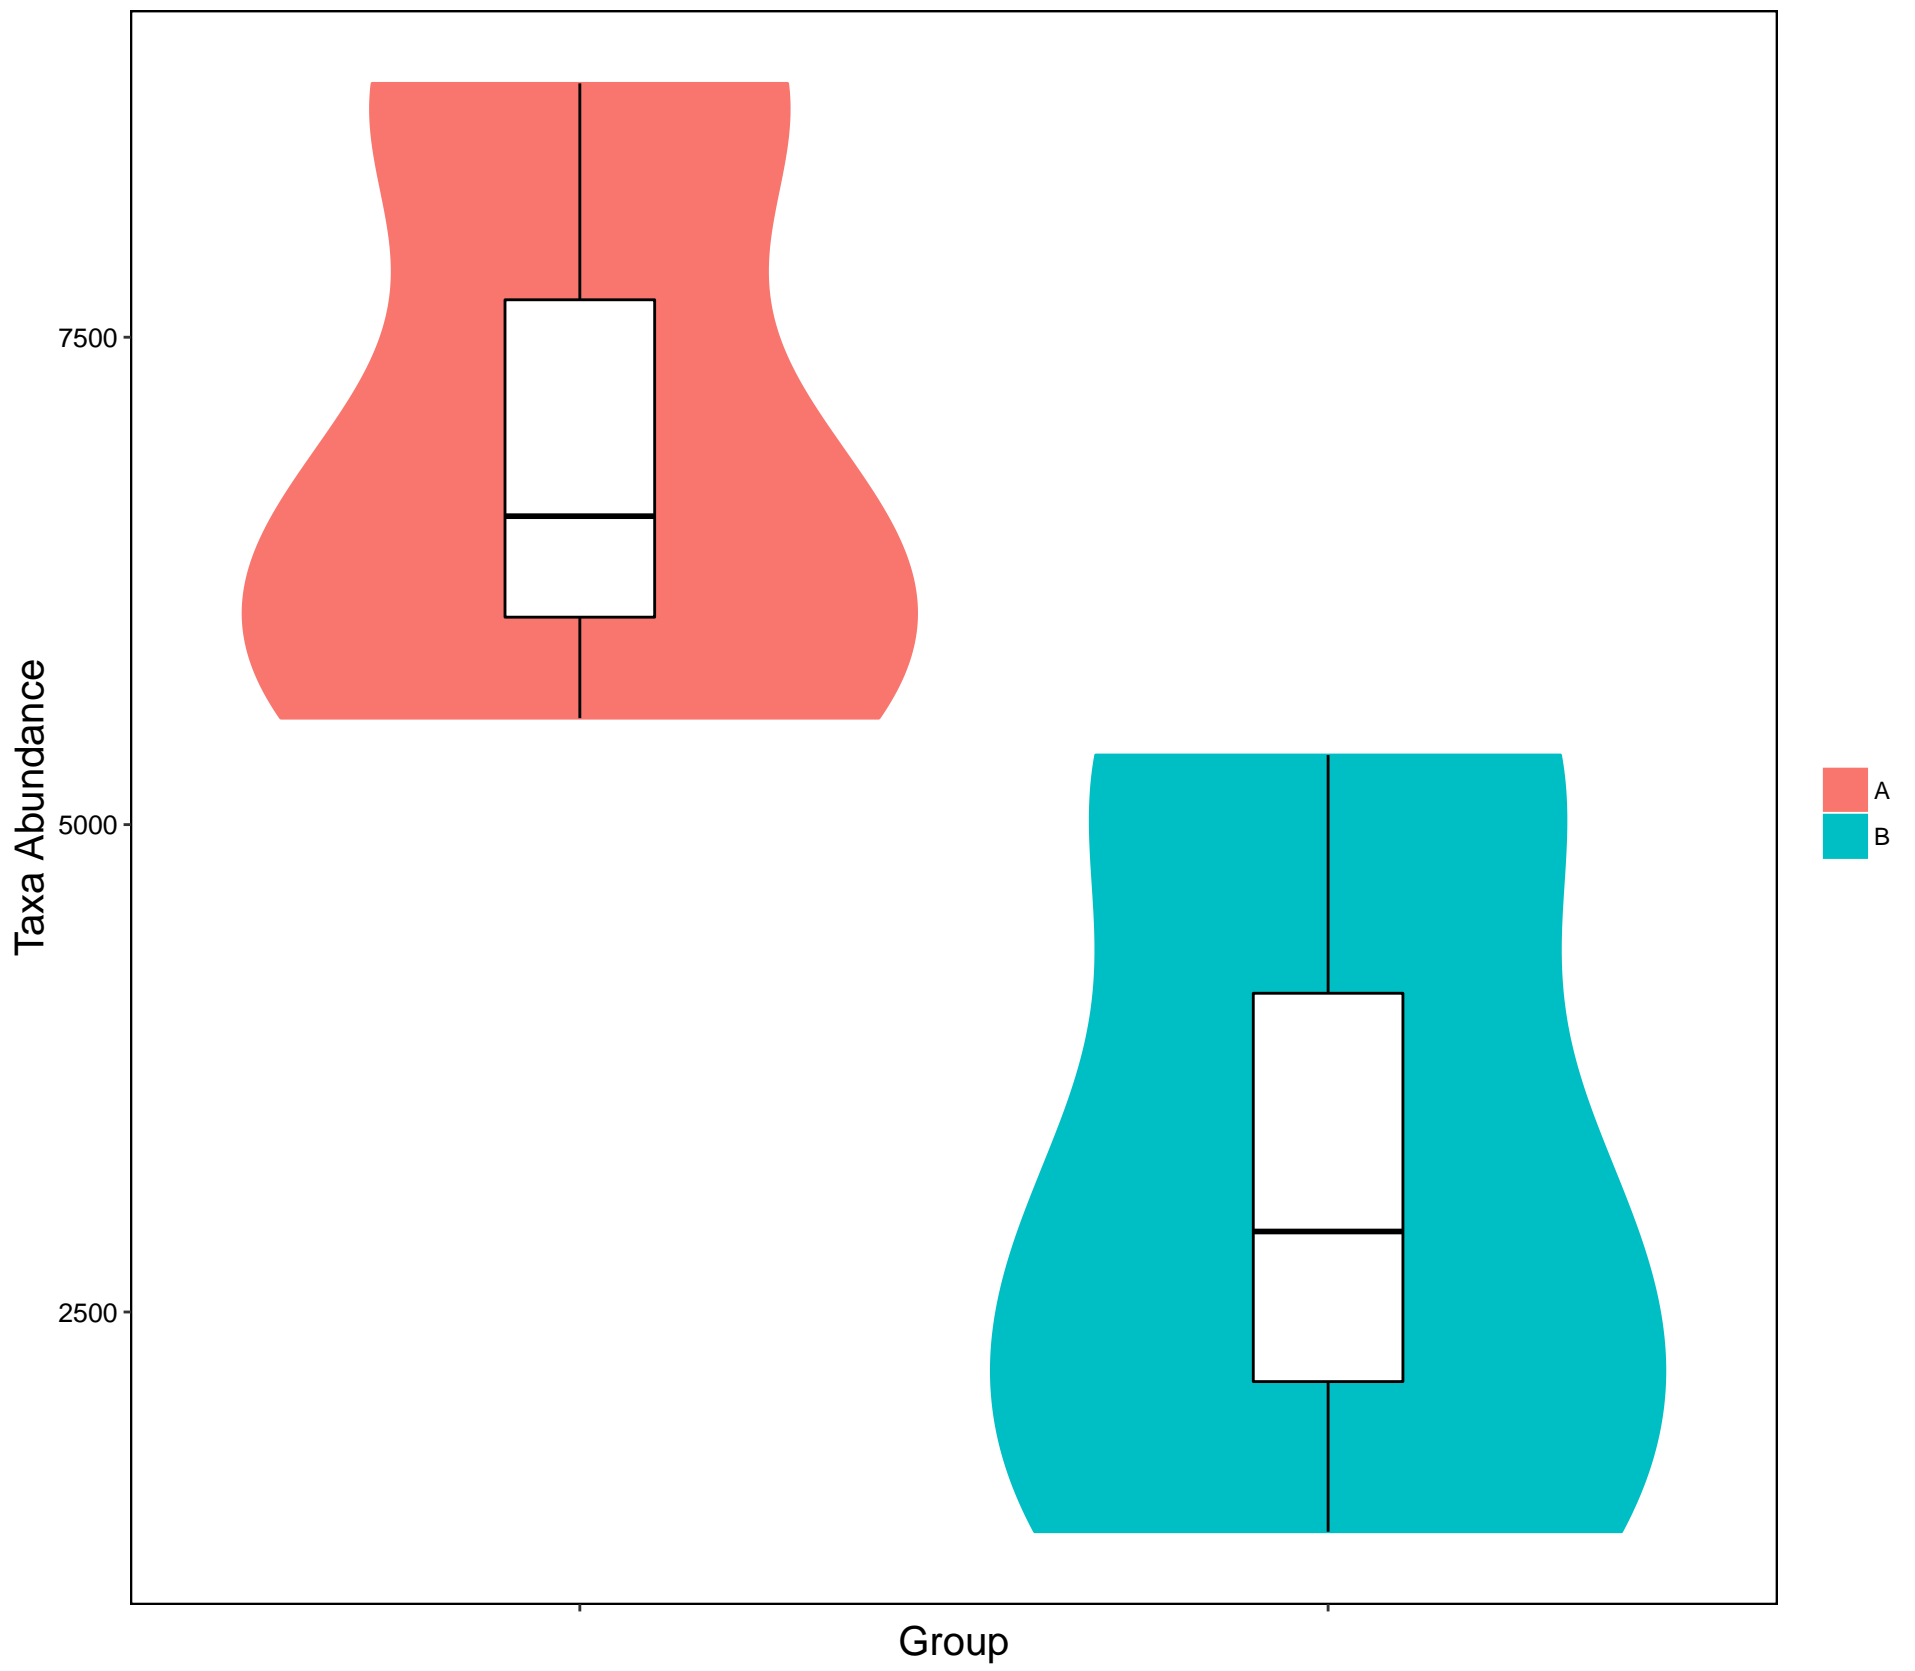

Supplement: Supplemental_File.zip [file Supplemental_File.zip]

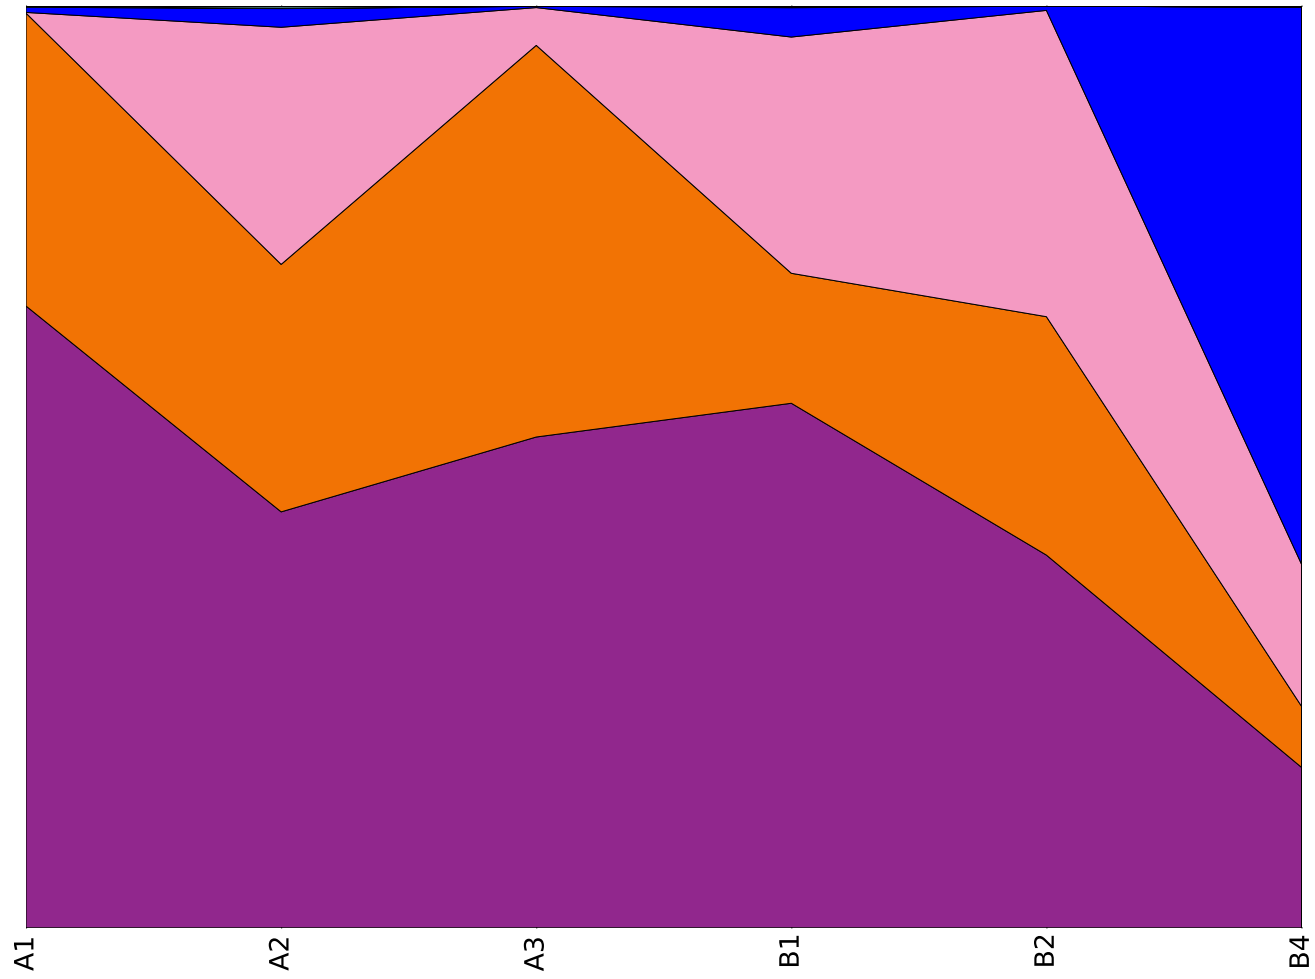

Supplement: Supplemental_File.zip [file Supplemental_File.zip]

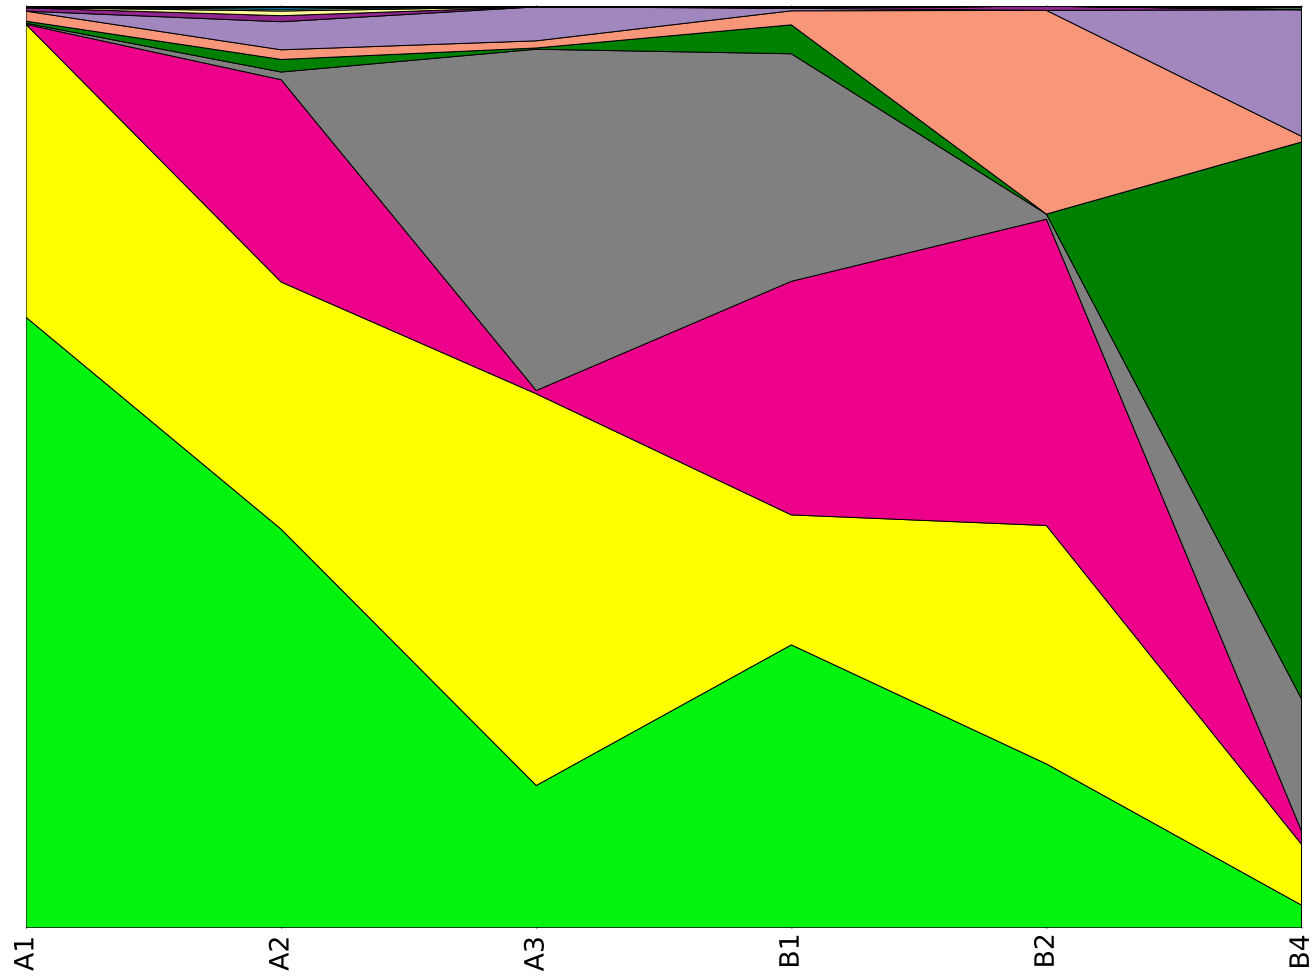

Supplement: Supplemental_File.zip [file Supplemental_File.zip]

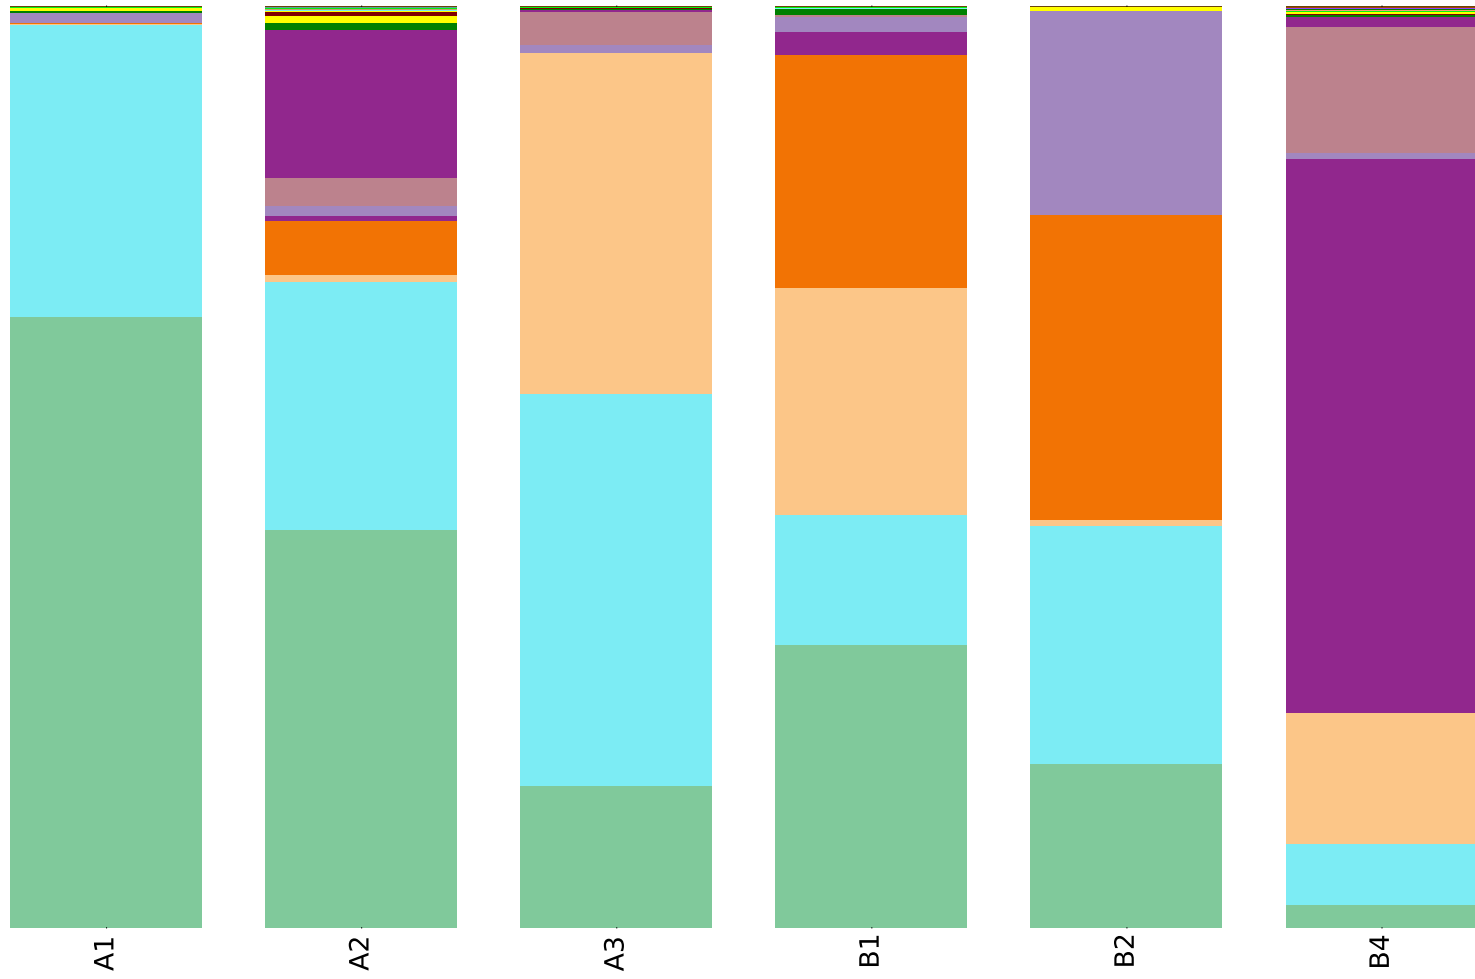

Supplement: Supplemental_File.zip [file Supplemental_File.zip]
